# Supplementary material for: Fe-Catalyzed three-component carboazidation of alkenes with alkanes and trimethylsilyl azide
Source: Royal Society of Chemistry journal article supplement (doi:10.1039/c8cc05090b), 2018-01-01

Electronic Supplementary Information

**Fe-catalyzed three-component carboazidation of alkenes with  
alkanes and trimethylsilyl azide**

Wei-Yu Li, Chuan-Shuo Wu, Wang Zhou, Luo Yang\*

**Table of Contents**

|                                                                                         |                |
|-----------------------------------------------------------------------------------------|----------------|
| <b>I. General information.....</b>                                                      | <b>S1</b>      |
| <b>II. General experimental procedure.....</b>                                          | <b>S1</b>      |
| <b>III. Optimization of the reaction conditions .....</b>                               | <b>S1-3</b>    |
| <b>Table S1. Optimization of catalysts.....</b>                                         | <b>S1-2</b>    |
| <b>Table S2. Optimization of the amount of cyclohexane .....</b>                        | <b>S2</b>      |
| <b>Table S3. Optimization of oxidants .....</b>                                         | <b>S2</b>      |
| <b>Table S4. Optimization of the loading of catalyst .....</b>                          | <b>S2-3</b>    |
| <b>IV. Mechanistic study .....</b>                                                      | <b>S3-4</b>    |
| <b>V. Synthetic transformations of the carboazidation products .....</b>                | <b>S4</b>      |
| <b>VI. Characterization data of the products.....</b>                                   | <b>S4-20</b>   |
| <b>VII. Copies of <sup>1</sup>H and <sup>13</sup>C NMR spectra of the products.....</b> | <b>S18-113</b> |

## I. General information

Unless otherwise noted, all commercially available reagents and analytical grade solvents (cyclohexane, cyclopentane, cyclooctane, cycloheptane, hexane, pentane, dichloromethane, chloroform, tetrachloromethane) were used as received without further purification.

Thin-layer chromatography (TLC) was performed using E. Merck silica gel 60 F254 precoated plates (0.25 mm) or Sorbent Silica Gel 60 F254 plates and visualized by UV lamp (254 nm). High-resolution mass spectra (HRMS) were obtained from a JEOL JMS-700 instrument (ESI) or Thermo Scientific LTQ-Orbitrap XL (MALDI). Melting points are uncorrected. Nuclear magnetic resonance (NMR) spectra were recorded on a Bruker Avance 400 spectrometer at ambient temperature. Chemical shifts for  $^1\text{H}$  NMR spectra are reported in parts per million (ppm) from tetramethylsilane with the solvent resonance as the internal standard (chloroform:  $\delta$  7.26 ppm). Chemical shifts for  $^{13}\text{C}$  NMR spectra are reported in parts per million (ppm) from tetramethylsilane with the solvent as the internal standard ( $\text{CDCl}_3$ :  $\delta$  77.16 ppm). Data are reported as following: chemical shift, multiplicity (s = singlet, d = doublet, dd = doublet of doublets, t = triplet, q = quartet, m = multiplet, br = broad signal), coupling constant (Hz), and integration.

## II. General experimental procedure

Representative procedure for the Fe-catalyzed three-component carboazidation of alkene:

An oven-dried reaction vessel was charged with  $\text{Fe}(\text{acac})_3$  (0.001 mmol, 0.5 mol%) in cyclohexane (1.5 mL, **2a**, pre-prepared solution), styrene (**1a**, 0.2 mmol, 1.0 equiv),  $\text{TMSN}_3$  (0.5 mmol, 2.5 equiv) and DTBP (0.5 mmol, 2.5 equiv) under argon atmosphere. The vessel was sealed and the mixture was stirred with heating at 110 °C (oil bath temperature) for 10 h. Afterwards the resulting mixture was cooled to room temperature. The solvent was removed in vacuo and the residue was purified by column chromatography on silica gel using a mixture of dichloromethane/petroleum ether as eluent to give product **3a**.

## III. Conditions optimization

Table S1. Optimization of catalysts<sup>a</sup>

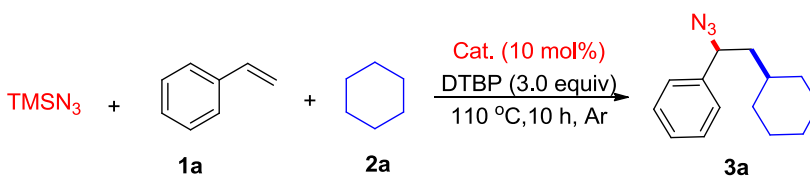

| entry    | Cat. (mol%)                 | yield [%] <sup>b</sup> |
|----------|-----------------------------|------------------------|
| <b>1</b> | -                           | <b>7</b>               |
| <b>2</b> | <b>FeCl<sub>2</sub></b>     | <b>&lt;2</b>           |
| <b>3</b> | <b>FeCl<sub>3</sub></b>     | <b>29</b>              |
| <b>4</b> | <b>Fe(acac)<sub>3</sub></b> | <b>53</b>              |

|           |                                              |             |
|-----------|----------------------------------------------|-------------|
| <b>5</b>  | <b>Fe(acac)<sub>2</sub></b>                  | <b>42</b>   |
| <b>6</b>  | <b>Fe(OAc)<sub>2</sub> · 4H<sub>2</sub>O</b> | <b>n.d.</b> |
| <b>7</b>  | <b>Co(acac)<sub>3</sub></b>                  | <b>n.d.</b> |
| <b>8</b>  | <b>Mn(AcO)<sub>2</sub></b>                   | <b>n.d.</b> |
| <b>9</b>  | <b>Cu(acac)<sub>2</sub></b>                  | <b>n.d.</b> |
| <b>10</b> | <b>Cu(OTf)<sub>2</sub></b>                   | <b>n.d.</b> |
| <b>11</b> | <b>CuCl</b>                                  | <b>n.d.</b> |

<sup>a</sup> Reaction conditions: styrene (**1a**, 0.2 mmol, 1.0 equiv), cyclohexane (**2a**, 1.0 mL), TMSN<sub>3</sub> (0.5 mmol, 2.5 equiv), DTBP (0.6 mmol, 3.0 equiv), Cat. (0.02 mmol, 10 mol %), stirred at 110 °C for 10 h under Ar. <sup>b</sup> Isolated yields.

**Table S2. Optimization for the amount of cyclohexane <sup>a</sup>**

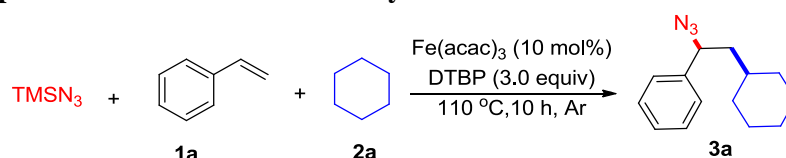

| entry    | cyclohexane (X mL) | yield [%] <sup>b</sup> |
|----------|--------------------|------------------------|
| <b>1</b> | <b>1.0</b>         | <b>53</b>              |
| <b>2</b> | <b>1.5</b>         | <b>68</b>              |
| <b>3</b> | <b>2.0</b>         | <b>62</b>              |

<sup>a</sup> Reaction conditions: styrene (**1a**, 0.2 mmol, 1.0 equiv), cyclohexane (**2a**, X mL), TMSN<sub>3</sub> (0.5 mmol, 2.5 equiv), DTBP (0.6 mmol, 3.0 equiv), Fe(acac)<sub>3</sub> (0.02 mmol, 10 mol %), stirred at 110 °C for 10 h under Ar. <sup>b</sup> Isolated yields.

**Table S3. Optimization of oxidants <sup>a</sup>**

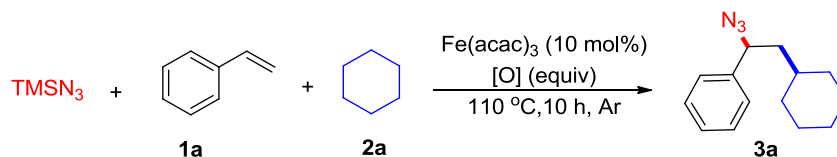

| Entry    | [O] (equiv)                                          | yield [%] <sup>b</sup> |
|----------|------------------------------------------------------|------------------------|
| <b>1</b> | <b>DTBP (3.0)</b>                                    | <b>68</b>              |
| <b>2</b> | <b>TBHP in Decane (3.0)</b>                          | <b>17</b>              |
| <b>3</b> | <b>PhI(AcO)<sub>2</sub> (3.0)</b>                    | <b>n.d.</b>            |
| <b>4</b> | <b>K<sub>2</sub>S<sub>2</sub>O<sub>8</sub> (3.0)</b> | <b>n.d.</b>            |
| <b>5</b> | <b>DCP (3.0)</b>                                     | <b>37</b>              |
| <b>6</b> | <b>BPO (3.0)</b>                                     | <b>35</b>              |
| <b>7</b> | <b>DTBP (2.5)</b>                                    | <b>73</b>              |
| <b>8</b> | <b>DTBP (2.0)</b>                                    | <b>65</b>              |

<sup>a</sup> Reaction conditions: styrene (**1a**, 0.2 mmol, 1.0 equiv), cyclohexane (**2a**, 1.5 mL), TMSN<sub>3</sub> (0.5 mmol, 2.5 equiv), [O] (equiv), Fe(acac)<sub>3</sub> (0.02 mmol, 10 mol %), stirred at 110 °C for 10 h under Ar. <sup>b</sup> Isolated yields.

**Table S4. Optimization of the amount of catalyst <sup>a</sup>**

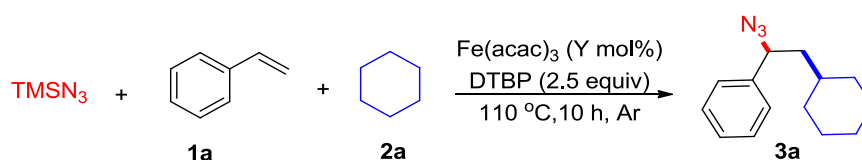

| entry | Fe(acac) <sub>3</sub> (Y mol%) | yield [%] <sup>b</sup> |
|-------|--------------------------------|------------------------|
| 1     | 15                             | 64                     |
| 2     | 10                             | 73                     |
| 3     | 5                              | 72                     |
| 4     | 1                              | 72                     |
| 5     | 0.5                            | 74                     |
| 6     | 0.25                           | 69                     |

<sup>a</sup> Reaction conditions: styrene (**1a**, 0.2 mmol, 1.0 equiv), cyclohexane (**2a**, 1.5 mL), TMSN<sub>3</sub> (0.5 mmol, 2.5 equiv), DTBP (0.5 mmol, 2.5 equiv), Fe(acac)<sub>3</sub> (Y mol %), stirred at 110 °C for 10 h under Ar. <sup>b</sup> Isolated yields.

#### IV. Mechanistic study

Radical capture experiment:

To further understand this Fe-catalyzed three-component alkylation-azidation of styrenes with alkane and trimethylsilyl azide, several control experiments were carried out in the presence of various radical scavengers. We found that: (a) in the presence of TEMPO (2,2,6,6-tetramethylpiperidine-1-oxyl, 2.0 equiv), the reaction was completely inhibited and the 1-(cyclohexyloxy)-2,2,6,6-tetramethylpiperidine was detected by GC-MS, which supported our speculation that the reaction proceeded via a radical pathway and confirmed the generation of alkyl radical; (b) in the presence of BHT (2,6-di-tert-butyl-4-methylphenol, 2.0 equiv), the product **3a** was not detected, which further confirmed that this cascade reaction was realized via radical pathway.

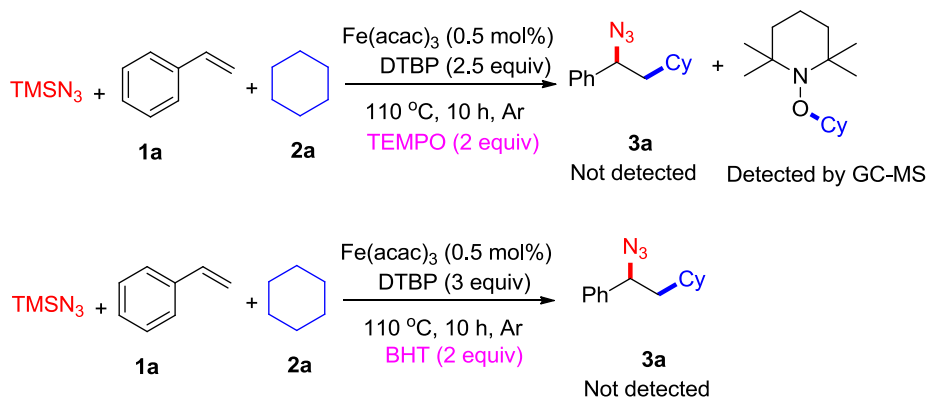

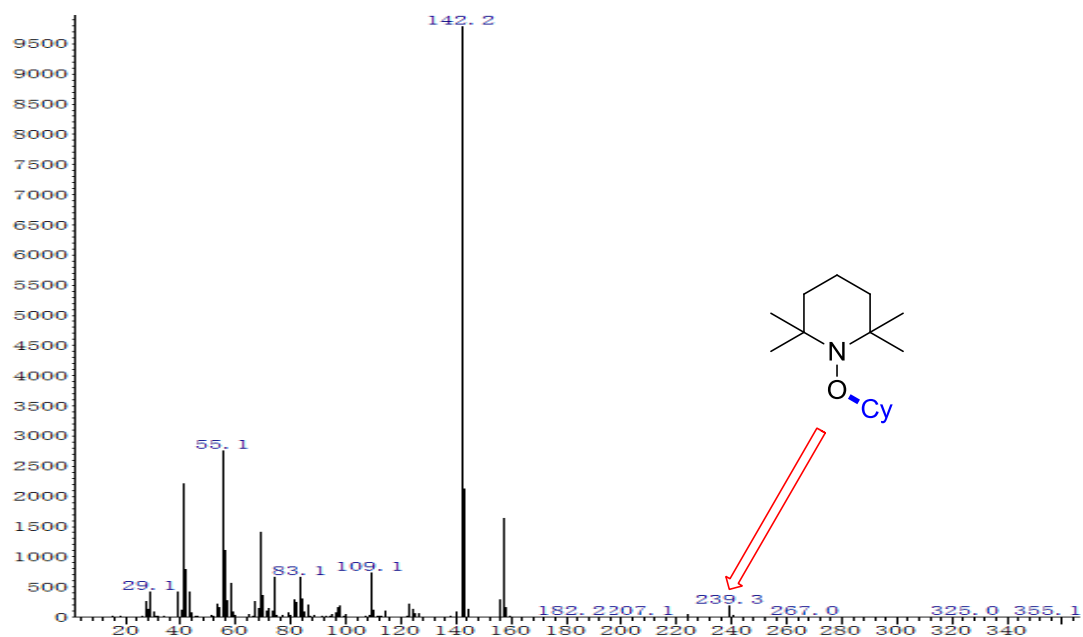

## V. Synthetic transformations of the carboazidation products

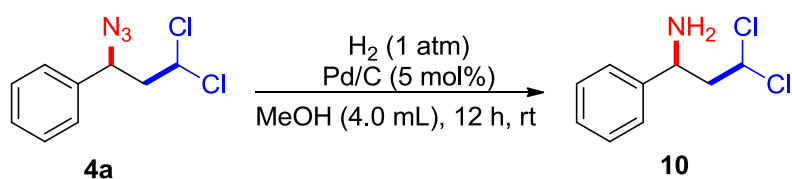

To a solution of **4a** (91.6 mg, 0.4 mmol) in MeOH (4 mL, 0.1 M) was added Pd/C (m/m 10%, 50% wet, 42 mg, 5 mol%). The reaction mixture was evacuated and filled with H<sub>2</sub> (from balloon) three times. After being stirred at room temperature for 12 hours, the reaction mixture was filtered through a plug of Celite. The resulting filtrate was concentrated in vacuo. The crude product was purified by flash column chromatography on silica gel (CH<sub>2</sub>Cl<sub>2</sub>/MeOH = 40:1) to give compound **14** (colorless oil, 57.6 mg, 71%).

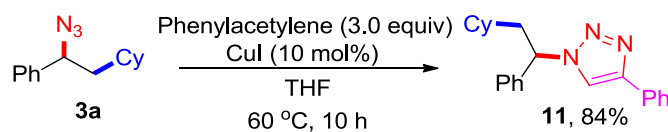

Compound **3a** (0.2 mmol, 1.0 equiv) was dissolved in THF (1 mL) in an oven-dried glass tube. Then phenylacetylene (0.6 mmol, 3.0 equiv) and CuI (0.02 mmol, 0.1 equiv) were added. The reaction mixture was stirred at 60 °C for 10 h, and the resulting solution was concentrated under vacuum. The residue was purified by column chromatography on silica gel with an eluent of petroleum ether and ethyl acetate (5:1) to afford compound **15** as a white solid (55.6 mg, 84%).

## VI. Spectroscopic data of the products

### (3a) (1-azido-2-cyclohexylethyl)benzene

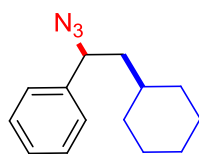

The title compound was prepared according to the general procedure described above by the reaction of styrene (**1a**) with TMSN<sub>3</sub> and cyclohexane (**2a**), and purified by flash column chromatography as colorless oil (33.8 mg, 74%).

<sup>1</sup>H NMR (400 MHz, CDCl<sub>3</sub>) δ 7.41 – 7.28 (m, 5H), 4.51 (dd, *J* = 8.4, 6.4 Hz, 1H), 1.80 – 1.53 (m, 7H), 1.39 – 1.31 (m, 1H), 1.26 – 1.12 (m, 3H), 0.99 – 0.87 (m, 2H); <sup>13</sup>C NMR (100 MHz, CDCl<sub>3</sub>) δ 140.3, 128.9, 128.3, 127.0, 63.9, 43.8, 34.5, 33.6, 33.0, 26.6, 26.3, 26.2. IR (cm<sup>-1</sup>): 2924, 2850, 2097, 1448, 1240, 816. HRMS: calcd. for C<sub>14</sub>H<sub>20</sub>N<sup>+</sup> [M–N<sub>2</sub>+H]<sup>+</sup>: 202.1596, Found: 202.1590.

### (3b) 1-(1-azido-2-cyclohexylethyl)-4-methylbenzene

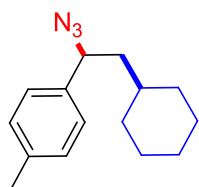

The title compound was prepared according to the general procedure described above by the reaction of 4-methylphenylene (**1b**) with TMSN<sub>3</sub> and cyclohexane (**2a**), and purified by flash column chromatography as colorless oil (33.0 mg, 68%).

<sup>1</sup>H NMR (400 MHz, CDCl<sub>3</sub>) δ 7.18 (s, 4H), 4.50 – 4.43 (m, 1H), 2.35 (s, 3H), 1.77 – 1.51 (m, 7H), 1.39 – 1.28 (m, 1H), 1.26 – 1.10 (m, 3H), 0.98 – 0.86 (m, 2H); <sup>13</sup>C NMR (100 MHz, CDCl<sub>3</sub>) δ 138.0, 137.2, 129.6, 127.0, 63.7, 43.7, 34.5, 33.5, 33.0, 26.6, 26.2, 26.1, 21.3. IR (cm<sup>-1</sup>): 2924, 2851, 2097, 1448, 1241, 816. HRMS: calcd. for C<sub>15</sub>H<sub>22</sub>N<sup>+</sup> [M–N<sub>2</sub>+H]<sup>+</sup>: 216.1747, Found: 216.1731.

### (3c) 1-(1-azido-2-cyclohexylethyl)-4-(*tert*-butyl)benzene

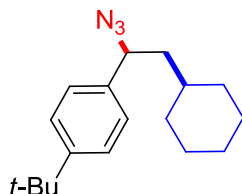

The title compound was prepared according to the general procedure described above by the reaction of 4-*tert*-butylstyrene (**1c**) with TMSN<sub>3</sub> and cyclohexane (**2a**), and purified by flash column chromatography as colorless oil (52.4 mg, 92%).

<sup>1</sup>H NMR (400 MHz, CDCl<sub>3</sub>) δ 7.41 – 7.35 (m, 2H), 7.25 – 7.20 (m, 2H), 4.47 (dd, *J* = 9.2, 6.0 Hz, 1H), 1.82 – 1.62 (m, 6H), 1.60 – 1.51 (m, 1H), 1.43 – 1.34 (m, 1H), 1.32 (s, 9H), 1.29 – 1.12 (m, 3H), 1.01 – 0.85 (m, 2H); <sup>13</sup>C NMR (100 MHz, CDCl<sub>3</sub>) δ 151.2, 137.3, 126.6, 125.8, 63.6, 43.8, 34.7, 34.5, 33.6, 32.9, 31.4, 26.6, 26.3, 26.2. IR (cm<sup>-1</sup>): 2924, 2852, 2097, 1448, 1241, 829. HRMS: calcd. for C<sub>18</sub>H<sub>28</sub>N<sup>+</sup> [M–N<sub>2</sub>+H]<sup>+</sup>: 258.2222, Found: 258.2156.

### (3d) 1-(1-azido-2-cyclohexylethyl)-4-methoxybenzene

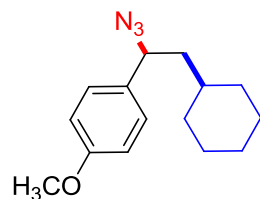

The title compound was prepared according to the general procedure described above by the reaction of 4-methoxystyrene (**1d**) with  $\text{TMSN}_3$  and cyclohexane (**2a**), and purified by flash column chromatography as colorless oil (28.5 mg, 55%).

$^1\text{H}$  NMR (400 MHz,  $\text{CDCl}_3$ )  $\delta$  7.25 – 7.21 (m, 2H), 6.93 – 6.88 (m, 2H), 4.46 (dd,  $J = 8.3, 6.8$  Hz, 1H), 3.82 (s, 3H), 1.78 – 1.61 (m, 6H), 1.60 – 1.52 (m, 1H), 1.37 – 1.28 (m, 1H), 1.26 – 1.11 (m, 3H), 0.99 – 0.86 (m, 2H);  $^{13}\text{C}$  NMR (100 MHz,  $\text{CDCl}_3$ )  $\delta$  159.5, 132.2, 128.3, 114.2, 63.5, 55.4, 43.6, 34.5, 33.5, 33.1, 26.6, 26.3, 26.2. IR ( $\text{cm}^{-1}$ ): 2924, 2851, 2095, 1513, 1249, 829. HRMS: calcd. for  $\text{C}_{15}\text{H}_{21}\text{NO}^+$  [ $\text{M}-\text{N}_2$ ] $^+$ : 231.1618, Found: 231.1577.

### (3e) 1-(1-azido-2-cyclohexylethyl)-4-(chloromethyl)benzene

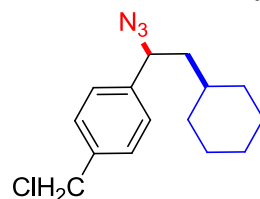

The title compound was prepared according to the general procedure described above by the reaction of 1-(chloromethyl)-4-ethenyl-benzene (**1e**) with  $\text{TMSN}_3$  and cyclohexane (**2a**), and purified by flash column chromatography as colorless oil (31.0 mg, 56%).

$^1\text{H}$  NMR (400 MHz,  $\text{CDCl}_3$ )  $\delta$  7.43 – 7.37 (m, 2H), 7.32 – 7.27 (m, 2H), 4.59 (s, 2H), 4.51 (dd,  $J = 8.3, 6.6$  Hz, 1H), 1.79 – 1.62 (m, 6H), 1.59 – 1.51 (m, 1H), 1.38 – 1.31 (m, 1H), 1.27 – 1.11 (m, 3H), 1.00 – 0.87 (m, 2H);  $^{13}\text{C}$  NMR (100 MHz,  $\text{CDCl}_3$ )  $\delta$  140.6, 137.4, 129.2, 127.4, 63.5, 46.0, 43.9, 34.4, 33.5, 33.0, 26.6, 26.2, 26.1. IR ( $\text{cm}^{-1}$ ): 2924, 2851, 2097, 1447, 1265, 684. HRMS: calcd. for  $\text{C}_{15}\text{H}_{21}\text{ClN}^+$  [ $\text{M}-\text{N}_2+\text{H}$ ] $^+$ : 250.1357, Found: 250.1341.

### (3f) 1-(1-azido-2-cyclohexylethyl)-4-fluorobenzene

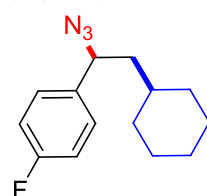

The title compound was prepared according to the general procedure described above by the reaction of 4-fluorostyrene (**1f**) with  $\text{TMSN}_3$  and cyclohexane (**2a**), and purified by flash column chromatography as colorless oil (36.0 mg, 73%).

$^1\text{H}$  NMR (400 MHz,  $\text{CDCl}_3$ )  $\delta$  7.30 – 7.25 (m, 2H), 7.10 – 7.03 (m, 2H), 4.50 (dd,  $J$  = 8.5, 6.6 Hz, 1H), 1.78 – 1.61 (m, 6H), 1.56 – 1.50 (m, 1H), 1.38 – 1.27 (m, 1H), 1.26 – 1.08 (m, 3H), 1.01 – 0.87 (m, 2H);  $^{13}\text{C}$  NMR (100 MHz,  $\text{CDCl}_3$ )  $\delta$  162.6 (d,  $J$  = 245.2 Hz), 136.1 (d,  $J$  = 3.3 Hz), 128.7 (d,  $J$  = 8.1 Hz), 115.8 (d,  $J$  = 21.4 Hz), 63.2, 43.9, 34.4, 33.5, 33.0, 26.6, 26.2, 26.2. IR ( $\text{cm}^{-1}$ ): 2924, 2852, 2097, 1510, 1231, 833. HRMS: calcd. for  $\text{C}_{14}\text{H}_{19}\text{FN}^+$  [ $\text{M}-\text{N}_2+\text{H}$ ] $^+$ : 220.1496, Found: 220.1474.

### (3g) 1-(1-azido-2-cyclohexylethyl)-4-chlorobenzene

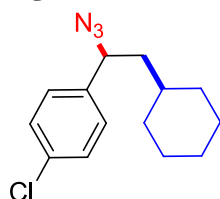

The title compound was prepared according to the general procedure described above by the reaction of 4-chlorostyrene (**1g**) with  $\text{TMSN}_3$  and cyclohexane (**2a**), and purified by flash column chromatography as colorless oil (36.5 mg, 68%).

$^1\text{H}$  NMR (400 MHz,  $\text{CDCl}_3$ )  $\delta$  7.38 – 7.33 (m, 2H), 7.28 – 7.20 (m, 2H), 4.49 (dd,  $J$  = 8.8, 6.4 Hz, 1H), 1.77 – 1.62 (m, 6H), 1.56 – 1.48 (m, 1H), 1.38 – 1.27 (m, 1H), 1.26 – 1.10 (m, 3H), 1.00 – 0.87 (m, 2H);  $^{13}\text{C}$  NMR (100 MHz,  $\text{CDCl}_3$ )  $\delta$  138.8, 134.1, 129.1, 128.4, 63.3, 43.9, 34.4, 33.5, 33.0, 26.6, 26.2, 26.2. IR ( $\text{cm}^{-1}$ ): 2924, 2851, 2096, 1448, 1240, 818. HRMS: calcd. for  $\text{C}_{14}\text{H}_{19}\text{ClN}^+$  [ $\text{M}-\text{N}_2+\text{H}$ ] $^+$ : 236.1201, Found: 236.1188.

### (3h) 1-(1-azido-2-cyclohexylethyl)-4-bromobenzene

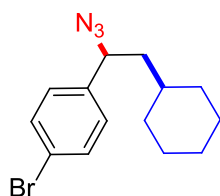

The title compound was prepared according to the general procedure described above by the reaction of 4-bromostyrene (**1h**) with  $\text{TMSN}_3$  and cyclohexane (**2a**), and purified by flash column chromatography as colorless oil (36.8 mg, 60%).

$^1\text{H}$  NMR (400 MHz,  $\text{CDCl}_3$ )  $\delta$  7.55 – 7.47 (m, 2H), 7.20 – 7.15 (m, 2H), 4.48 (dd,  $J$  = 8.4, 6.4 Hz, 1H), 1.80 – 1.60 (m, 6H), 1.56 – 1.48 (m, 1H), 1.37 – 1.27 (m, 1H), 1.26 – 1.10 (m, 3H), 1.00 – 0.86 (m, 2H);  $^{13}\text{C}$  NMR (100 MHz,  $\text{CDCl}_3$ )  $\delta$  139.4, 132.1, 128.7, 122.2, 63.3, 43.8, 34.4, 33.5, 33.0, 26.5, 26.2, 26.1. IR ( $\text{cm}^{-1}$ ): 2923, 2851, 2096, 1488, 1240, 821. HRMS: calcd. for  $\text{C}_{14}\text{H}_{19}\text{BrN}^+$  [ $\text{M}-\text{N}_2+\text{H}$ ] $^+$ : 280.0695, Found: 280.0660.

### (3i) 1-(1-azido-2-cyclohexylethyl)-3-chlorobenzene

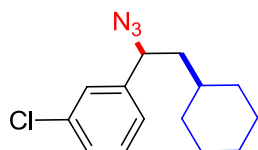



The title compound was prepared according to the general procedure described above by the reaction of 3-chlorostyrene (**1i**) with TMSN<sub>3</sub> and cyclohexane (**2a**), and purified by flash column chromatography as colorless oil (36.8 mg, 70%).

<sup>1</sup>H NMR (400 MHz, CDCl<sub>3</sub>) δ 7.33 – 7.27 (m, 3H), 7.20 – 7.16 (m, 1H), 4.48 (dd, *J* = 8.6, 6.2 Hz, 1H), 1.80 – 1.63 (m, 6H), 1.57 – 1.48 (m, 1H), 1.40 – 1.30 (m, 1H), 1.27 – 1.110 (m, 3H), 1.00 – 0.86 (m, 2H); <sup>13</sup>C NMR (100 MHz, CDCl<sub>3</sub>) δ 142.5, 134.8, 130.2, 128.5, 127.1, 125.1, 63.4, 43.9, 34.4, 33.6, 32.9, 26.6, 26.2, 26.1. IR (cm<sup>-1</sup>): 2924, 2851, 2097, 1448, 1248, 699. HRMS: calcd. for C<sub>14</sub>H<sub>19</sub>ClN<sup>+</sup> [M–N<sub>2</sub>+H]<sup>+</sup>: 236.1201, Found: 236.1189..

### (3j) 1-(1-azido-2-cyclohexylethyl)-2-chlorobenzene

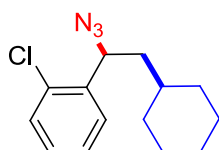

The title compound was prepared according to the general procedure described above by the reaction of 2-chlorostyrene (**1j**) with TMSN<sub>3</sub> and cyclohexane (**2a**), and purified by flash column chromatography as colorless oil (39.9 mg, 76%).

<sup>1</sup>H NMR (400 MHz, CDCl<sub>3</sub>) δ 7.49 – 7.43 (m, 1H), 7.38 (dd, *J* = 8.0, 0.8 Hz, 1H), 7.35 – 7.28 (m, 1H), 7.26 – 7.21 (m, 1H), 5.10 (dd, *J* = 9.2, 4.8 Hz, 1H), 1.89 (d, *J* = 12.3 Hz, 1H), 1.78 – 1.56 (m, 6H), 1.51 – 1.40 (m, 1H), 1.30 – 1.13 (m, 3H), 1.02 – 0.91 (m, 2H); <sup>13</sup>C NMR (100 MHz, CDCl<sub>3</sub>) δ 138.5, 132.9, 129.9, 129.1, 127.7, 127.5, 60.0, 43.4, 34.7, 33.9, 32.5, 26.6, 26.3, 26.1. IR (cm<sup>-1</sup>): 2923, 2851, 2099, 1447, 1249, 754. HRMS: calcd. for C<sub>14</sub>H<sub>19</sub>ClN<sup>+</sup> [M–N<sub>2</sub>+H]<sup>+</sup>: 236.1201, Found: 236.1188.

### (3k) 1-(1-azido-2-cyclohexylethyl)-3-bromobenzene

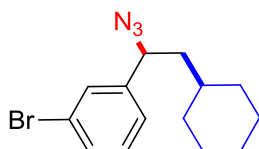

The title compound was prepared according to the general procedure described above by the reaction between 3-bromostyrene (**1k**) with TMSN<sub>3</sub> and cyclohexane (**2a**), and purified by flash column chromatography as colorless oil (44.8 mg, 73%).

<sup>1</sup>H NMR (400 MHz, CDCl<sub>3</sub>) δ 7.47 – 7.42 (m, 2H), 7.26 – 7.21 (m, 2H), 4.47 (dd, *J* = 8.8, 6.0 Hz, 1H), 1.81 – 1.62 (m, 6H), 1.56 – 1.48 (m, 1H), 1.42 – 1.30 (m, 1H), 1.28 – 1.12 (m, 3H), 1.00 – 0.86 (m, 2H); <sup>13</sup>C NMR (100 MHz, CDCl<sub>3</sub>) δ 142.8, 131.4, 130.5, 130.0, 125.6, 123.0, 63.3, 43.9, 34.4, 33.6, 32.9, 26.5, 26.2, 26.1. IR (cm<sup>-1</sup>): 2924, 2851, 2094, 1448, 1246, 697. HRMS: calcd. for C<sub>14</sub>H<sub>19</sub>BrN<sup>+</sup> [M–N<sub>2</sub>+H]<sup>+</sup>: 280.0695, Found: 280.0661.

### (3l) (2-azido-1-cyclohexylpropan-2-yl)benzene

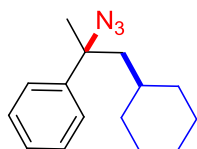

The title compound was prepared according to the general procedure described above by the reaction of alpha-methylstyrene (**1l**) with TMSN<sub>3</sub> and cyclohexane (**2a**), and purified by flash column chromatography as colorless oil (35.0 mg, 72%).

<sup>1</sup>H NMR (400 MHz, CDCl<sub>3</sub>) δ 7.41 – 7.32 (m, 4H), 7.28 – 7.23 (m, 1H), 1.77 – 1.73 (m, 2H), 1.66 (s, 3H), 1.65 – 1.51 (m, 4H), 1.44 – 1.38 (m, 1H), 1.31 – 1.20 (m, 1H), 1.14 – 1.04 (m, 3H), 0.96 – 0.78 (m, 2H); <sup>13</sup>C NMR (100 MHz, CDCl<sub>3</sub>) δ 140.3, 128.9, 128.3, 127.0, 64.6, 44.4, 35.9, 34.8, 34.1, 28.6, 26.3, 26.2. IR (cm<sup>-1</sup>): 2959, 2929, 2095, 1454, 1244, 699. HRMS: calcd. for C<sub>15</sub>H<sub>22</sub>N<sup>+</sup> [M–N<sub>2</sub>+H]<sup>+</sup>: 216.1747, Found: 216.1731.

### (3m) (1-azido-2-cyclohexylethane-1,1-diyl)dibenzene

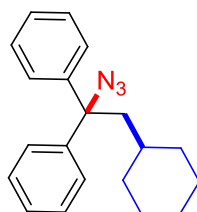

The title compound was prepared according to the general procedure described above by the reaction of 1,1-diphenylethylene (**1m**) with TMSN<sub>3</sub> and cyclohexane (**2a**), and purified by flash column chromatography as colorless oil (51.8 mg, 85%).

<sup>1</sup>H NMR (400 MHz, CDCl<sub>3</sub>) δ 7.40 – 7.22 (m, 10H), 2.35 – 2.28 (m, 2H), 1.60 – 1.46 (m, 5H), 1.32 – 1.23 (m, 1H), 1.13 – 0.91 (m, 5H); <sup>13</sup>C NMR (100 MHz, CDCl<sub>3</sub>) δ 143.7, 128.3, 127.4, 127.2, 72.6, 45.6, 34.6, 33.7, 26.4, 26.3. IR (cm<sup>-1</sup>): 2922, 2851, 2102, 1446, 1259, 698. HRMS: calcd. For C<sub>20</sub>H<sub>23</sub>N<sup>+</sup> [M–N<sub>2</sub>]<sup>+</sup>: 277.1825, Found: 277.1819.

### (3n) 2-(1-azido-2-cyclohexylethyl)naphthalene

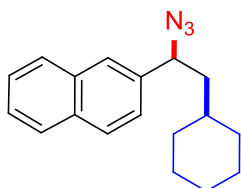

The title compound was prepared according to the general procedure described above by the reaction of 2-vinylnaphthalene (**1n**) with TMSN<sub>3</sub> and cyclohexane (**2a**), and purified by flash column chromatography as colorless oil (34.6 mg, 62%).

<sup>1</sup>H NMR (400 MHz, CDCl<sub>3</sub>) δ 7.89 – 7.82 (m, 3H), 7.34 (s, 1H), 7.52 – 7.49 (m, 2H), 7.43 (dd, *J* = 8.5, 1.7 Hz, 1H), 4.68 (dd, *J* = 8.5, 6.6 Hz, 1H), 1.85 – 1.74 (m, 3H), 1.72 – 1.61 (m, 4H), 1.43 – 1.32 (m, 1H), 1.26 – 1.10 (m, 3H), 1.01 – 0.88 (m, 2H); <sup>13</sup>C NMR (100 MHz, CDCl<sub>3</sub>) δ 137.6, 133.3, 133.3, 128.9, 128.1, 127.9, 126.5, 126.4, 126.2, 124.6, 64.2, 43.8, 34.5, 33.5, 33.1, 26.6, 26.2, 26.2. IR (cm<sup>-1</sup>): 2923, 2850,

2097, 1447, 1240, 748. HRMS: calcd. for  $C_{18}H_{22}N^+$   $[M-N_2+H]^+$ : 252.1747, Found: 252.1724.

**(3o) (1-azido-2-cyclopentylethyl)benzene**

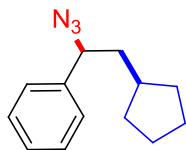

The title compound was prepared according to the general procedure described above by the reaction of styrene (**1a**) with  $TMSN_3$  and cyclopentane (**2b**), and purified by flash column chromatography as colorless oil (31.2 mg, 72%).

$^1H$  NMR (400 MHz,  $CDCl_3$ )  $\delta$  7.42 – 7.30 (m, 5H), 4.43 (t,  $J = 7.0$  Hz, 1H), 1.93 – 1.85 (m, 1H), 1.84 – 1.71 (m, 4H), 1.67 – 1.57 (m, 2H), 1.56 – 1.46 (m, 2H), 1.19 – 1.07 (m, 2H);  $^{13}C$  NMR (100 MHz,  $CDCl_3$ )  $\delta$  140.1, 128.9, 128.3, 127.1, 65.9, 42.6, 37.0, 32.7, 25.2, 25.1. IR ( $cm^{-1}$ ): 2949, 2867, 2560, 2094, 1246, 700. HRMS: calcd. for  $C_{13}H_{18}N^+$   $[M+H-N_2]^+$ : 188.1439, Found: 188.1434.

**(3p) (2-azido-2-phenylethyl)cycloheptane**

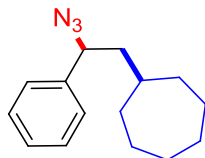

The title compound was prepared according to the general procedure described above by the reaction of styrene (**1a**) with  $TMSN_3$  and cycloheptane (**2c**), and purified by flash column chromatography as colorless oil (34.0 mg, 70%).

$^1H$  NMR (400 MHz,  $CDCl_3$ )  $\delta$  7.41 – 7.28 (m, 5H), 4.47 (dd,  $J = 8.6, 5.8$  Hz, 1H), 1.80 – 1.68 (m, 3H), 1.66 – 1.54 (m, 6H), 1.50 – 1.36 (m, 4H), 1.27 – 1.16 (m, 2H);  $^{13}C$  NMR (100 MHz,  $CDCl_3$ )  $\delta$  144.1, 128.5, 127.2, 125.6, 67.1, 49.3, 34.8, 34.5, 34.0, 26.8, 26.4, 26.3. IR ( $cm^{-1}$ ): 2922, 2851, 2102, 1446, 1255, 698. HRMS: calcd. for  $C_{15}H_{22}N^+$   $[M-N_2+H]^+$ : 216.1747, Found: 216.1731.

**(3q) (2-azido-2-phenylethyl)cyclooctane**

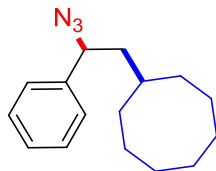

The title compound was prepared according to the general procedure described above by the reaction between styrene (**1a**) with  $TMSN_3$  and cyclooctane (**2d**), and purified by flash column chromatography as colorless oil (37.5 mg, 73%).

$^1H$  NMR (400 MHz,  $CDCl_3$ )  $\delta$  7.41 – 7.28 (m, 5H), 4.48 (dd,  $J = 8.6, 5.4$  Hz, 1H), 1.76 (t,  $J = 8.4$  Hz, 1H), 1.69 – 1.53 (m, 9H), 1.49 – 1.39 (m, 5H), 1.35 – 1.27 (m, 2H);  $^{13}C$  NMR (100 MHz,  $CDCl_3$ )  $\delta$  140.4, 128.9, 128.3, 127.0, 64.6, 44.4, 33.9, 32.5, 31.6,

27.4, 27.4, 26.3, 25.4, 25.3. IR (cm<sup>-1</sup>): 2922, 2852, 2094, 1448, 1243, 699. HRMS: calcd. for C<sub>16</sub>H<sub>23</sub>N<sup>+</sup> [M-N<sub>2</sub>]<sup>+</sup>: 229.1825, Found: 229.1805.

### (3r) (1-azido-3-methylheptyl)benzene

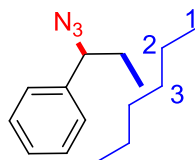

The title compound was prepared according to the general procedure described above by the reaction of styrene (**1a**) with TMSN<sub>3</sub> and n-hexane (**2e**), and purified by flash column chromatography as colorless oil (25.5 mg, 55%).

<sup>1</sup>H NMR (400 MHz, CDCl<sub>3</sub>) δ 7.43 – 7.37 (m, 15.5×1H), 7.37 – 7.30 (m, 22H), 4.55 – 4.47 (m, 6.5×1H), 4.42 (t, *J* = 7.2 Hz, 1H), 1.97 – 1.55 (m, 15H), 1.53 – 1.08 (m, 52.5×1H), 0.98 – 0.82 (m, 45H); <sup>13</sup>C NMR (100 MHz, CDCl<sub>3</sub>) δ 140.5, 140.4, 140.3, 140.1, 139.9, 128.9, 128.8, 128.3, 128.3 128.2, 127.1, 127.0, 127.0, 126.9, 66.5, 64.6, 64.4, 43.8, 43.2, 40.2, 36.9, 36.4, 36.3, 35.5, 35.48, 35.36, 35.1, 31.9, 29.8, 29.7, 29.3, 29.2, 29.1, 29.0, 26.3, 25.9, 25.4, 23.0, 22.7, 19.8, 19.6, 19.5, 19.4, 14.5, 14.2, 14.2, 10.6, 10.4. IR (cm<sup>-1</sup>): 2957, 2928, 2094, 1454, 1243, 699. HRMS: calcd. For C<sub>14</sub>H<sub>21</sub>N<sup>+</sup> [M-N<sub>2</sub>]<sup>+</sup>: 203.1669, Found: 203.1627.

### (4a) (1-azido-3,3-dichloropropyl)benzene

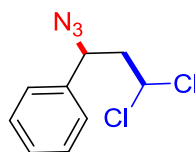

The title compound was prepared according to the general procedure described above by the reaction of styrene (**1a**) with TMSN<sub>3</sub> and dichloromethane, and purified by flash column chromatography as colorless oil (34.4 mg, 75%).

<sup>1</sup>H NMR (400 MHz, CDCl<sub>3</sub>) δ 7.46 – 7.32 (m, 5H), 5.74 (dd, *J* = 8.4, 4.9 Hz, 1H), 4.75 (dd, *J* = 9.5, 5.1 Hz, 1H), 2.65 (ddd, *J* = 14.4, 9.5, 4.9 Hz, 1H), 2.48 (ddd, *J* = 14.0, 8.4, 5.2 Hz, 1H); <sup>13</sup>C NMR (100 MHz, CDCl<sub>3</sub>) δ 137.6, 129.4, 129.2, 127.1, 70.2, 63.3, 49.8. IR (cm<sup>-1</sup>): 2103, 1455, 1249, 759, 700. HRMS: calcd. for C<sub>9</sub>H<sub>9</sub>Cl<sub>2</sub>N<sup>+</sup> [M-N<sub>2</sub>]<sup>+</sup>: 201.0107, Found: 201.0086.

### (4b) 1-(1-azido-3,3-dichloropropyl)-4-methylbenzene

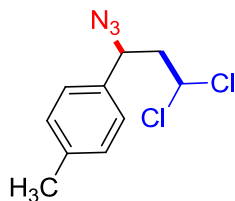

The title compound was prepared according to the general procedure described above by the reaction of 4-methylphenylene (**1b**) with TMSN<sub>3</sub> and dichloromethane, and purified by flash column chromatography as colorless oil (34.5 mg, 71%).

$^1\text{H}$  NMR (400 MHz,  $\text{CDCl}_3$ )  $\delta$  7.22 (s, 4H), 5.71 (dd,  $J = 8.2, 5.0$  Hz, 1H), 4.71 (dd,  $J = 9.4, 5.2$  Hz, 1H), 2.64 (ddd,  $J = 14.4, 9.4, 5.1$  Hz, 1H), 2.46 (ddd,  $J = 14.4, 8.4, 5.2$  Hz, 1H), 2.37 (s, 3H);  $^{13}\text{C}$  NMR (100 MHz,  $\text{CDCl}_3$ )  $\delta$  139.1, 134.5, 130.0, 127.0, 70.3, 63.1, 49.8, 21.3. IR ( $\text{cm}^{-1}$ ): 2960, 2110, 1243, 818, 748. HRMS: calcd. for  $\text{C}_{10}\text{H}_{11}\text{Cl}_2\text{N}^+ [\text{M}-\text{N}_2]^+$ : 215.0263, Found: 215.0193.

**(4c) 1-(1-azido-3,3-dichloropropyl)-4-(*tert*-butyl)benzene**

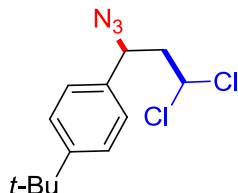

The title compound was prepared according to the general procedure described above by the reaction of 4-*tert*-butylstyrene (**1c**) with  $\text{TMSN}_3$  and dichloromethane, and purified by flash column chromatography as colorless oil (46.7mg, 82%).

$^1\text{H}$  NMR (400 MHz,  $\text{CDCl}_3$ )  $\delta$  7.45 – 7.41 (m, 2H), 7.28 – 7.24 (m, 2H), 5.73 (dd,  $J = 8.2, 5.0$  Hz, 1H), 4.72 (dd,  $J = 9.4, 5.3$  Hz, 1H), 2.64 (ddd,  $J = 14.4, 9.2, 5.0$  Hz, 1H), 2.47 (ddd,  $J = 14.0, 8.2, 5.4$  Hz, 1H), 1.33 (s, 9H);  $^{13}\text{C}$  NMR (100 MHz,  $\text{CDCl}_3$ )  $\delta$  152.3, 134.5, 126.8, 126.2, 70.3, 63.0, 49.8, 34.8, 31.4. IR ( $\text{cm}^{-1}$ ): 2964, 2105, 1246, 572. HRMS: calcd. For  $\text{C}_{13}\text{H}_{17}\text{Cl}_2\text{N}^+ [\text{M}-\text{N}_2]^+$ : 257.0733, Found: 257.0699.

**(4d) 1-(1-azido-3,3-dichloropropyl)-4-methoxybenzene**

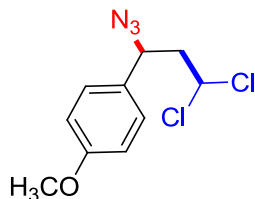

The title compound was prepared according to the general procedure described above by the reaction of 4-methoxystyrene (**1d**) with  $\text{TMSN}_3$  and dichloromethane, and purified by flash column chromatography as colorless oil (22.2 mg, 43%).

$^1\text{H}$  NMR (400 MHz,  $\text{CDCl}_3$ )  $\delta$  7.29 – 7.24 (m, 2H), 6.96 – 6.90 (m, 2H), 5.70 (dd,  $J = 8.0, 5.2$  Hz, 1H), 4.70 (dd,  $J = 9.2, 5.2$  Hz, 1H), 3.83 (s, 3H), 2.64 (ddd,  $J = 14.4, 9.4, 5.2$  Hz, 1H), 2.45 (ddd,  $J = 14.0, 8.2, 5.3$  Hz, 1H);  $^{13}\text{C}$  NMR (100 MHz,  $\text{CDCl}_3$ )  $\delta$  160.2, 129.4, 128.4, 114.8, 70.3, 62.8, 55.5, 49.8. IR ( $\text{cm}^{-1}$ ): 2104, 1514, 1611, 1251, 833. HRMS: calcd. for  $\text{C}_{10}\text{H}_{11}\text{Cl}_2\text{NO}^+ [\text{M}-\text{N}_2]^+$ : 231.0212, Found: 231.0182.

**(4e) 1-(1-azido-3,3-dichloropropyl)-4-(chloromethyl)benzene**

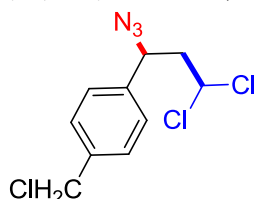

The title compound was prepared according to the general procedure described above by the reaction of 1-(chloromethyl)-4-ethenyl-benzene (**1e**) with TMSN<sub>3</sub> and dichloromethane, and purified by flash column chromatography as colorless oil (35.3 mg, 64%).

<sup>1</sup>H NMR (400 MHz, CDCl<sub>3</sub>) δ 7.47 – 7.43 (m, 2H), 7.37 – 7.32 (m, 2H), 5.74 (dd, *J* = 8.4, 4.8 Hz, 1H), 4.76 (dd, *J* = 9.6, 5.2 Hz, 1H), 4.60 (s, 2H), 2.63 (ddd, *J* = 14.4, 9.6, 4.8 Hz, 1H), 2.46 (ddd, *J* = 13.6, 8.6, 5.4 Hz, 1H); <sup>13</sup>C NMR (100 MHz, CDCl<sub>3</sub>) δ 138.1, 137.9, 129.6, 127.5, 70.0, 63.0, 49.8, 45.6. IR (cm<sup>-1</sup>): 2360, 2105, 1246, 682. EI MS *m/z*: C<sub>10</sub>H<sub>10</sub>Cl<sub>3</sub><sup>+</sup> [M–N<sub>3</sub>]<sup>+</sup>: 235.0.

#### (4f) 1-(1-azido-3,3-dichloropropyl)-4-fluorobenzene

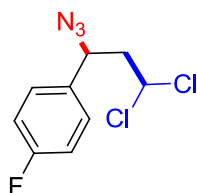

The title compound was prepared according to the general procedure described above by the reaction between 4-fluorostyrene (**1f**) with TMSN<sub>3</sub> and dichloromethane, and purified by flash column chromatography as colorless oil (34.5 mg, 70%).

<sup>1</sup>H NMR (400 MHz, CDCl<sub>3</sub>) δ 7.36 – 7.30 (m, 2H), 7.15 – 7.09 (m, 2H), 5.74 (dd, *J* = 8.2, 5.0 Hz, 1H), 4.75 (dd, *J* = 9.4, 5.2 Hz, 1H), 2.63 (ddd, *J* = 14.4, 9.4, 5.2 Hz, 1H), 2.45 (ddd, *J* = 13.8, 8.4, 5.2 Hz, 1H); <sup>13</sup>C NMR (100 MHz, CDCl<sub>3</sub>) δ 163.0 (d, *J* = 248.3 Hz), 133.5 (d, *J* = 3.3 Hz), 128.9 (d, *J* = 8.3 Hz), 116.4 (d, *J* = 21.8 Hz), 70.0, 62.6, 49.9. IR (cm<sup>-1</sup>): 2360, 2106, 1510, 1229, 836. EI MS *m/z*: C<sub>9</sub>H<sub>8</sub>Cl<sub>2</sub>F<sup>+</sup> [M–N<sub>3</sub>]<sup>+</sup>: 205.0.

#### (4g) 1-(1-azido-3,3-dichloropropyl)-4-chlorobenzene

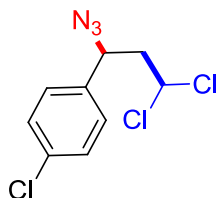

The title compound was prepared according to the general procedure described above by the reaction of 4-chlorostyrene (**1g**) with TMSN<sub>3</sub> and dichloromethane, and purified by flash column chromatography as colorless oil (37.8 mg, 72%).

<sup>1</sup>H NMR (400 MHz, CDCl<sub>3</sub>) δ 7.43 – 7.38 (m, 2H), 7.30 – 7.26 (m, 2H), 5.73 (dd, *J* = 8.4, 4.8 Hz, 1H), 4.74 (dd, *J* = 9.4, 5.0 Hz, 1H), 2.61 (ddd, *J* = 14.4, 9.6, 4.8 Hz, 1H), 2.45 (ddd, *J* = 14.0, 8.6, 5.0 Hz, 1H); <sup>13</sup>C NMR (100 MHz, CDCl<sub>3</sub>) δ 136.2, 135.1, 129.6, 128.4, 69.9, 62.7, 49.8. IR (cm<sup>-1</sup>): 2104, 1493, 1245, 1092, 829. HRMS: calcd. for C<sub>9</sub>H<sub>8</sub>Cl<sub>3</sub>N<sup>+</sup> [M–N<sub>2</sub>]<sup>+</sup>: 234.9717, Found: 234.9659.

#### (4h) 1-(1-azido-3,3-dichloropropyl)-4-bromobenzene

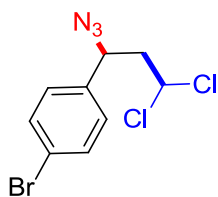

The title compound was prepared according to the general procedure described above by the reaction of 4-bromostyrene (**1h**) with TMSN<sub>3</sub> and dichloromethane, and purified by flash column chromatography as colorless oil (39.9 mg, 65%).

<sup>1</sup>H NMR (400 MHz, CDCl<sub>3</sub>) δ 7.44 – 7.38 (m, 2H), 7.32 – 7.27 (m, 2H), 5.73 (dd, *J* = 8.4, 4.8 Hz, 1H), 4.74 (dd, *J* = 9.4, 5.2 Hz, 1H), 2.61 (ddd, *J* = 14.4, 9.6, 4.8 Hz, 1H), 2.44 (ddd, *J* = 14.4, 8.6, 5.0 Hz, 1H); <sup>13</sup>C NMR (100 MHz, CDCl<sub>3</sub>) δ 136.2, 135.1, 129.6, 128.4, 69.9, 62.7, 49.8. IR (cm<sup>-1</sup>): 2360, 2101, 1492, 1242, 827. HRMS: calcd. for C<sub>9</sub>H<sub>8</sub>BrCl<sub>2</sub>N<sup>+</sup> [M–N<sub>2</sub>]<sup>+</sup>: 278.9212, Found: 278.9278.

**(4i) 1-(1-azido-3,3-dichloropropyl)-3-chlorobenzene**

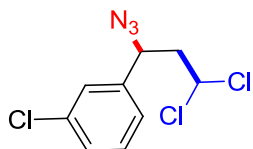

The title compound was prepared according to the general procedure described above by the reaction of 3-chlorostyrene (**1i**) with TMSN<sub>3</sub> and dichloromethane, and purified by flash column chromatography as colorless oil (38.4 mg, 73%).

<sup>1</sup>H NMR (400 MHz, CDCl<sub>3</sub>) δ 7.49 – 7.41 (m, 2H), 7.38 – 7.28 (m, 2H), 5.90 (dd, *J* = 9.4, 3.8 Hz, 1H), 5.34 (dd, *J* = 10.2, 3.8 Hz, 1H), 2.56 (ddd, *J* = 14.4, 9.4, 4.0 Hz, 1H), 2.46 (ddd, *J* = 14.4, 10.0, 3.6 Hz, 1H); <sup>13</sup>C NMR (100 MHz, CDCl<sub>3</sub>) δ 139.9, 135.4, 130.7, 129.4, 127.2, 125.2, 69.9, 62.8, 49.8. IR (cm<sup>-1</sup>): 2361, 2109, 1477, 1245, 696. HRMS: calcd. for C<sub>9</sub>H<sub>8</sub>Cl<sub>3</sub>N<sup>+</sup> [M–N<sub>2</sub>]<sup>+</sup>: 234.9717, Found: 234.9659.

**(4j) 1-(1-azido-3,3-dichloropropyl)-2-chlorobenzene**

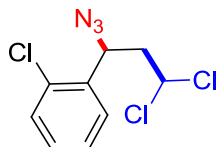

The title compound was prepared according to the general procedure described above by the reaction of 2-chlorostyrene (**1j**) with TMSN<sub>3</sub> and dichloromethane, and purified by flash column chromatography as colorless oil (37.9 mg, 72%).

<sup>1</sup>H NMR (400 MHz, CDCl<sub>3</sub>) δ 7.39 – 7.33 (m, 3H), 7.26 – 7.21 (m, 1H), 5.75 (dd, *J* = 8.6, 4.8 Hz, 1H), 4.74 (dd, *J* = 9.7, 4.9 Hz, 1H), 2.60 (ddd, *J* = 14.4, 9.7, 4.7 Hz, 1H), 2.45 (ddd, *J* = 14.4, 8.6, 4.9 Hz, 1H). <sup>13</sup>C NMR (100 MHz, CDCl<sub>3</sub>) δ 135.9, 133.0, 130.3, 130.0, 127.9, 127.8, 70.1, 59.9, 48.8. IR (cm<sup>-1</sup>): 2363, 2112, 1479, 1249, 699. HRMS: calcd. for C<sub>9</sub>H<sub>8</sub>Cl<sub>3</sub>N<sup>+</sup> [M–N<sub>2</sub>]<sup>+</sup>: 234.9717, Found: 234.9659.

**(4k) 1-(1-azido-3,3-dichloropropyl)-3-bromobenzene**

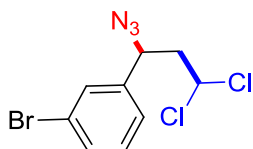

The title compound was prepared according to the general procedure described above by the reaction between 3-bromostyrene (**1k**) with TMSN<sub>3</sub> and dichloromethane, and purified by flash column chromatography as colorless oil (38.1 mg, 62%).

<sup>1</sup>H NMR (400 MHz, CDCl<sub>3</sub>) δ 7.55 – 7.49 (m, 2H), 7.33 – 7.25 (m, 2H), 5.76 (dd, *J* = 8.8, 4.8 Hz, 1H), 4.73 (dd, *J* = 9.7, 4.9 Hz, 1H), 2.60 (ddd, *J* = 14.4, 9.7, 4.7 Hz, 1H), 2.45 (ddd, *J* = 14.4, 8.7, 4.9 Hz, 1H); <sup>13</sup>C NMR (100 MHz, CDCl<sub>3</sub>) δ 140.1, 132.4, 130.9, 130.1, 125.8, 123.4, 69.9, 62.8, 49.9. IR (cm<sup>-1</sup>): 2923, 2360, 2100, 1475, 1244, 697. HRMS: calcd. for C<sub>9</sub>H<sub>8</sub>BrCl<sub>2</sub>N<sup>+</sup> [M–N<sub>2</sub>]<sup>+</sup>: 278.9212, Found: 278.9277.

#### (4l) (2-azido-4,4-dichlorobutan-2-yl)benzene

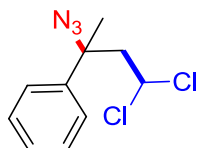

The title compound was prepared according to the general procedure described above by the reaction of alpha-methylstyrene (**1l**) with TMSN<sub>3</sub> and dichloromethane, and purified by flash column chromatography as colorless oil (38.4 mg, 79%).

<sup>1</sup>H NMR (400 MHz, CDCl<sub>3</sub>) δ 7.41 (m, 4H), 7.33 (m, 1H), 5.58 – 5.53 (m, 1H), 2.79 (dd, *J* = 5.6, 4.4 Hz, 2H), 1.82 (s, 3H); <sup>13</sup>C NMR (100 MHz, CDCl<sub>3</sub>) δ 141.7, 129.1, 128.2, 125.6, 69.0, 65.5, 55.4, 25.8. IR (cm<sup>-1</sup>): 2359, 2110, 1446, 1250, 698. HRMS: calcd. for C<sub>10</sub>H<sub>11</sub>Cl<sub>2</sub>N<sup>+</sup> [M–N<sub>2</sub>]<sup>+</sup>: 215.0263, Found: 215.0193.

#### (4m) (1-azido-3,3-dichloropropane-1,1-diyl)dibenzene

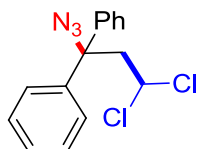

The title compound was prepared according to the general procedure described above by the reaction of 1,1-diphenylethylene (**1m**) with TMSN<sub>3</sub> and dichloromethane, and purified by flash column chromatography as colorless oil (49.1 mg, 81%).

<sup>1</sup>H NMR (400 MHz, CDCl<sub>3</sub>) δ 7.40 – 7.28 (m, 10H), 5.43 (t, *J* = 5.4 Hz, 1H), 3.41 (d, *J* = 5.4 Hz, 2H); <sup>13</sup>C NMR (100 MHz, CDCl<sub>3</sub>) δ 141.3, 128.9, 128.4, 127.0, 70.8, 69.0, 52.2. IR (cm<sup>-1</sup>): 2112, 1447, 1257, 1000, 698. HRMS: calcd. for C<sub>15</sub>H<sub>13</sub>Cl<sub>2</sub>N<sup>+</sup> [M–N<sub>2</sub>]<sup>+</sup>: 277.0420, Found: 277.0486.

#### (4n) 2-(1-azido-3,3-dichloropropyl)naphthalene

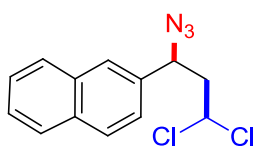



The title compound was prepared according to the general procedure described above by the reaction of 2-vinylnaphthalene (**1n**) with TMSN<sub>3</sub> and dichloromethane, and purified by flash column chromatography as colorless oil (34.6 mg, 62%).

<sup>1</sup>H NMR (400 MHz, CDCl<sub>3</sub>) δ 7.93 – 7.84 (m, 3H), 7.80 (d, *J* = 1.2 Hz, 1H), 7.55 – 7.51 (m, 2H), 7.43 (dd, *J* = 8.5, 1.8 Hz, 1H), 5.76 (dd, *J* = 8.2, 5.0 Hz, 1H), 4.92 (dd, *J* = 9.3, 5.3 Hz, 1H), 2.73 (ddd, *J* = 14.4, 9.2, 5.2 Hz, 1H), 2.56 (ddd, *J* = 14.2, 8.2, 5.2 Hz, 1H); <sup>13</sup>C NMR (100 MHz, CDCl<sub>3</sub>) δ 134.9, 133.6, 133.3, 129.6, 128.2, 128.0, 126.9, 126.9, 126.7, 124.1, 70.2, 63.6, 49.8. IR (cm<sup>-1</sup>): 2110, 1243, 818, 748. HRMS: calcd. For C<sub>13</sub>H<sub>11</sub>Cl<sub>2</sub>N<sup>+</sup> [M–N<sub>2</sub>]<sup>+</sup>: 251.0263, Found: 251.0211.

#### (5a) (1-azido-3,3,3-trichloropropyl)benzene <sup>1</sup>

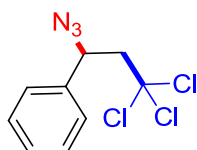

The title compound was prepared according to the general procedure described above by the reaction of styrene (**1a**) with TMSN<sub>3</sub> and chloroform, and purified by flash column chromatography as colorless oil (32.2 mg, 67%).

<sup>1</sup>H NMR (400 MHz, CDCl<sub>3</sub>) δ 7.46 – 7.34 (m, 5H), 4.95 (dd, *J* = 7.2, 3.9 Hz, 1H), 3.22 (dd, *J* = 15.2, 7.3 Hz, 1H), 3.11 (dd, *J* = 15.2, 3.9 Hz, 1H). <sup>13</sup>C NMR (100 MHz, CDCl<sub>3</sub>) δ 138.8, 129.3, 129.0, 127.0, 96.8, 63.5, 60.2. IR (cm<sup>-1</sup>): 2962, 2103, 1266, 1005, 700.

#### (5b) 1-(1-azido-3,3,3-trichloropropyl)-4-methoxybenzene

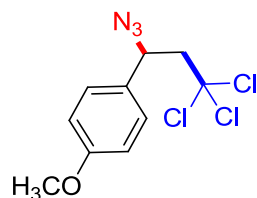

The title compound was prepared according to the general procedure described above by the reaction of 4-methoxystyrene (**1d**) with TMSN<sub>3</sub> and trichloromethane, and purified by flash column chromatography as colorless oil (34.6 mg, 59%).

<sup>1</sup>H NMR (400 MHz, CDCl<sub>3</sub>) δ 7.32 – 7.26 (m, 2H), 6.97 – 6.91 (m, 2H), 4.91 (dd, *J* = 6.8, 4.5 Hz, 1H), 3.83 (s, 3H), 3.20 (dd, *J* = 15.2, 6.8 Hz, 1H), 3.09 (dd, *J* = 15.2, 4.4 Hz, 1H). <sup>13</sup>C NMR (100 MHz, CDCl<sub>3</sub>) δ 160.0, 130.6, 128.4, 114.5, 96.8, 63.0, 60.0, 55.4. IR (cm<sup>-1</sup>): 2105, 1519, 1615, 1253, 839. HRMS: calcd. for C<sub>10</sub>H<sub>11</sub>Cl<sub>3</sub>NO<sup>+</sup> [M–N<sub>2</sub>+H]<sup>+</sup>: 265.9901, Found: 265.9895.

#### (5c) 1-(1-azido-3,3,3-trichloropropyl)-4-(tert-butyl)benzene

<sup>1</sup> B. Chen, C. Fang, P. Liu, J. M. Ready. *Angew. Chem. Int. Ed.* **2017**, *56*, 8780.

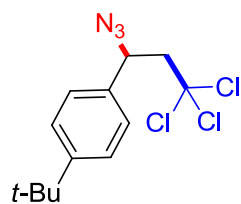

The title compound was prepared according to the general procedure described above by the reaction of 4-*tert*-butylstyrene (**1c**) with TMSN<sub>3</sub> and tetrachloride, and purified by flash column chromatography as colorless oil (30.0 mg, 47%).

<sup>1</sup>H NMR (400 MHz, CDCl<sub>3</sub>) δ 7.46 – 7.40 (m, 2H), 7.30 – 7.26 (m, 2H), 4.92 (dd, *J* = 7.5, 3.5 Hz, 1H), 3.21 (dd, *J* = 15.0, 7.6 Hz, 1H), 3.10 (dd, *J* = 15.2, 3.5 Hz, 1H), 1.33 (s, 9H); <sup>13</sup>C NMR (100 MHz, CDCl<sub>3</sub>) δ 152.1, 135.8, 126.6, 126.2, 97.0, 63.3, 60.2, 34.8, 31.4. IR (cm<sup>-1</sup>): 2964, 2101, 1268, 1009, 706. HRMS: calcd. for C<sub>13</sub>H<sub>16</sub>Cl<sub>3</sub>N<sup>+</sup> [M–N<sub>2</sub>]<sup>+</sup>: 291.0343, Found: 291.0299.

**(5d) (1-azido-3,3,3-trichloropropane-1,1-diyl)dibenzene**

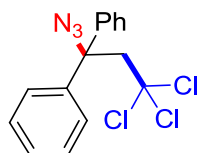

The title compound was prepared according to the general procedure described above by the reaction of 1,1-diphenylethylene (**1m**) with TMSN<sub>3</sub> and tetrachloride, and purified by flash column chromatography as colorless oil (39.9 mg, 58%).

<sup>1</sup>H NMR (400 MHz, CDCl<sub>3</sub>) δ 7.37 – 7.29 (m, 10H), 3.95 (s, 2H); <sup>13</sup>C NMR (100 MHz, CDCl<sub>3</sub>) δ 141.8, 128.6, 128.2, 127.3, 127.3, 95.8, 70.8, 59.4. IR (cm<sup>-1</sup>): 2114, 1447, 1258, 1015, 697. HRMS: calcd. for C<sub>15</sub>H<sub>13</sub>Cl<sub>3</sub>N<sup>+</sup> [M–N<sub>2</sub>+H]<sup>+</sup>: 312.0108, Found: 312.0997.

**(6) 1-(*tert*-butyl)-4-(1,3,3,3-tetrachloropropyl)benzene**

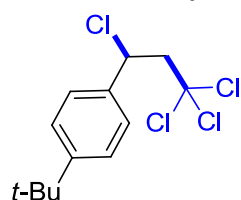

Colorless oil (9.5 mg, 15%). <sup>1</sup>H NMR (400 MHz, CDCl<sub>3</sub>) δ 7.41 – 7.33 (m, 4H), 5.29 (t, *J* = 5.8 Hz, 1H), 3.61 (dd, *J* = 15.4, 5.7 Hz, 1H), 3.52 (dd, *J* = 15.4, 5.9 Hz, 1H), 1.31 (s, 9H). <sup>13</sup>C NMR (100 MHz, CDCl<sub>3</sub>) δ 152.2, 137.6, 127.1, 126.0, 96.5, 62.9, 58.3, 34.8, 31.4. IR (cm<sup>-1</sup>): 2969, 2108, 1279, 1010, 712. HRMS: calcd. for C<sub>13</sub>H<sub>17</sub>Cl<sub>4</sub><sup>+</sup> [M+H]<sup>+</sup>: 313.0079, Found: 313.0073.

**(7) 1,4-dicyclohexylbutane-2,3-diyl)dibenzene**

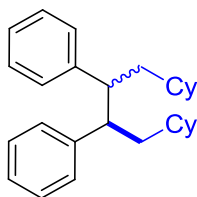

Melting point: 79 – 81.5 °C.

$^1\text{H}$  NMR (400 MHz,  $\text{CDCl}_3$ )  $\delta$  7.33 – 7.27 (m, 4H), 7.24 – 7.18 (m, 2H), 7.18 – 7.10 (m, 4H), 2.76 (dd,  $J = 6.3, 3.1$  Hz, 2H), 1.70 (d,  $J = 12.0$  Hz, 2H), 1.54 – 1.41 (m, 6H), 1.37 – 1.24 (m, 4H), 1.09 – 0.90 (m, 8H), 0.79 – 0.62 (m, 4H), 0.57 – 0.44 (m, 2H);  $^{13}\text{C}$  NMR (100 MHz,  $\text{CDCl}_3$ )  $\delta$  145.2, 128.5, 128.3, 126.0, 49.5, 42.5, 34.7, 34.6, 31.8, 26.7, 26.3, 26.1. IR ( $\text{cm}^{-1}$ ): 2959, 2929, 1454, 1244, 699. HRMS: calcd. for  $\text{C}_{28}\text{H}_{38}^+$   $[\text{M}]^+$ : 274.2968, Found: 274.2999.

**(9a) 4-(2-azidopropan-2-yl)-1-(cyclohexylmethyl)cyclohex-1-ene**

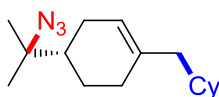

The title compound was prepared according to the general procedure described above by the reaction of ethyl beta-pinene (**8**) with  $\text{TMSN}_3$  and cyclohexane (**2a**), and purified by flash column chromatography as colorless oil (38.6 mg, 74%).

$^1\text{H}$  NMR (400 MHz,  $\text{CDCl}_3$ )  $\delta$  5.33 (d,  $J = 4.6$  Hz, 1H), 2.12 – 1.92 (m, 3H), 1.89 – 1.78 (m, 4H), 1.72 – 1.60 (m, 5H), 1.57 – 1.50 (m, 1H), 1.42 – 1.31 (m, 1H), 1.29 – 1.09 (m, 10H), 0.91 – 0.73 (m, 2H);  $^{13}\text{C}$  NMR (100 MHz,  $\text{CDCl}_3$ )  $\delta$  136.6, 121.1, 64.4, 45.9, 43.8, 35.6, 33.7, 33.2, 29.3, 26.9, 26.8, 26.5, 24.4, 24.0, 23.1. IR ( $\text{cm}^{-1}$ ): 2960, 2334, 2108, 1224, 700. HRMS: calcd. for  $\text{C}_{16}\text{H}_{27}\text{N}_3\text{Na}^+$   $[\text{M}+\text{Na}]^+$ : 284.2097, Found: 284.2149.

**(9b) 4-(2-azidopropan-2-yl)-1-(2,2-dichloroethyl)cyclohex-1-ene**

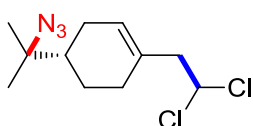

The title compound was prepared according to the general procedure described above by the reaction of beta-pinene (**8**) with  $\text{TMSN}_3$  and dichloromethane, and purified by flash column chromatography as colorless oil (37.5 mg, 72%).

$^1\text{H}$  NMR (400 MHz,  $\text{CDCl}_3$ )  $\delta$  5.77 (t,  $J = 6.7$  Hz, 1H), 5.61 (d,  $J = 2.2$  Hz, 1H), 2.84 (d,  $J = 6.7$  Hz, 2H), 2.20 – 1.99 (m, 3H), 1.94 – 1.84 (m, 2H), 1.56 (m, 1H), 1.34 – 1.27 (m, 1H), 1.27 (s, 3H), 1.24 (s, 3H);  $^{13}\text{C}$  NMR (101 MHz,  $\text{CDCl}_3$ )  $\delta$  132.2, 126.4, 72.0, 64.1, 51.5, 43.2, 29.1, 26.9, 24.0, 23.9, 23.2. IR ( $\text{cm}^{-1}$ ): 2961, 2111, 1243, 699. HRMS: calcd. For  $\text{C}_{11}\text{H}_{17}\text{Cl}_2\text{N}_3\text{Na}^+$   $[\text{M}+\text{Na}]^+$ : 284.0692, Found: 284.0658.

**(9c) 4-(2-azidopropan-2-yl)-1-(2,2,2-trichloroethyl)cyclohex-1-ene**

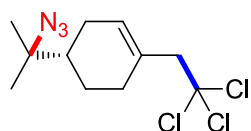

The title compound was prepared according to the general procedure described above by the reaction of beta-pinene (**8**) with TMSN<sub>3</sub> and trichloromethane, and purified by flash column chromatography as colorless oil (40 mg, 23.6%).

<sup>1</sup>H NMR (400 MHz, CDCl<sub>3</sub>) δ 5.81 (s, 1H), 3.34 (s, 2H), 2.46 – 2.27 (m, 2H), 2.25 – 2.13 (m, 1H), 2.01 – 1.86 (m, 2H), 1.67 – 1.49 (m, 2H), 1.29 (s, 3H), 1.26 (s, 3H); <sup>13</sup>C NMR (100 MHz, CDCl<sub>3</sub>) δ 131.4, 130.8, 99.2, 64.1, 62.0, 43.1, 30.7, 27.3, 24.3, 23.9, 23.3. IR (cm<sup>-1</sup>): 2964, 2110, 1238, 701. HRMS: calcd. For C<sub>11</sub>H<sub>16</sub>Cl<sub>3</sub>N<sub>3</sub>Na<sup>+</sup> [M+Na]<sup>+</sup>: 318.0302, Found: 318.026

#### (14) 3,3-dichloro-1-phenylpropan-1-amine

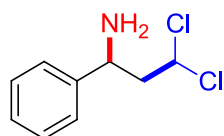

<sup>1</sup>H NMR (400 MHz, CDCl<sub>3</sub>) δ 7.39 – 7.26 (m, 5H), 5.71 (t, *J* = 6.7 Hz, 1H), 4.80 – 3.88 (m, 1H), 2.58 – 2.44 (m, 2H), 1.51 (s, 2H); <sup>13</sup>C NMR (101 MHz, CDCl<sub>3</sub>) δ 144.6, 129.0, 127.8, 126.2, 71.5, 53.7, 52.8. IR (cm<sup>-1</sup>): 2960, 2443, 1459, 701. HRMS: calcd. for C<sub>9</sub>H<sub>11</sub>Cl<sub>2</sub>NNa<sup>+</sup> [M+Na]<sup>+</sup>: 226.0161, Found: 226.0156.

#### (15) 1-(2-cyclohexyl-1-phenylethyl)-4-phenyl-1H-1,2,3-triazole

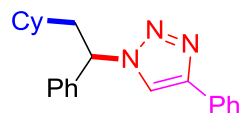

Melting point: 137 - 140 °C.

<sup>1</sup>H NMR (400 MHz, CDCl<sub>3</sub>) δ 7.85 – 7.79 (m, 2H), 7.71 (s, 1H), 7.43 – 7.28 (m, 8H), 5.80 (dd, *J* = 9.2, 6.6 Hz, 1H), 2.48 – 2.36 (m, 1H), 2.13 (dt, *J* = 14.1, 7.0 Hz, 1H), 1.87 (d, *J* = 12.2 Hz, 1H), 1.80 – 1.60 (m, 4H), 1.21 – 1.11 (m, 4H), 1.07 – 0.95 (m, 2H); <sup>13</sup>C NMR (100 MHz, CDCl<sub>3</sub>) δ 147.8, 139.5, 130.8, 129.1, 128.9, 128.6, 128.2, 127.0, 125.8, 118.5, 62.7, 42.8, 34.2, 33.4, 32.9, 26.5, 26.1, 26.0. IR (cm<sup>-1</sup>): 2923, 2851, 2103, 1446. HRMS: calcd. for C<sub>22</sub>H<sub>26</sub>N<sub>3</sub><sup>+</sup> [M+H]<sup>+</sup>: 332.2121, Found: 332.2113.

#### (11a) (1-azido-2-cyclohexylethyl)benzene

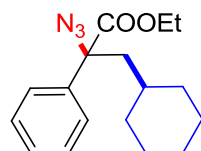

The title compound was prepared according to the general procedure described above by the reaction of ethyl 2-phenylacrylate (**10**) with TMSN<sub>3</sub> and cyclohexane (**2a**), and purified by flash column chromatography as colorless oil (42.1mg, 70%).

<sup>1</sup>H NMR (400 MHz, CDCl<sub>3</sub>) δ 7.45 – 7.30 (m, 5H), 4.30 – 4.23 (m, 2H), 2.15 (dd, *J* = 14.5, 6.2 Hz, 1H), 2.02 (dd, *J* = 14.5, 5.3 Hz, 1H), 1.75 – 1.55 (m, 5H), 1.48 – 1.37 (m,

1H), 1.28 (t,  $J = 7.1$  Hz, 3H), 1.22 – 1.07 (m, 3H), 1.04 – 0.89 (m, 2H);  $^{13}\text{C}$  NMR (100 MHz,  $\text{CDCl}_3$ )  $\delta$  171.5, 138.8, 128.8, 128.4, 126.0, 72.8, 62.3, 45.0, 34.7, 34.3, 33.8, 26.4, 26.2, 14.1. IR ( $\text{cm}^{-1}$ ): 2956, 2359, 2118, 1735, 1445, 1208, 699. HRMS: calcd. for  $\text{C}_{17}\text{H}_{23}\text{N}_3\text{O}_2\text{Na}^+$   $[\text{M}+\text{Na}]^+$ : 324.1682, Found: 324.1682.

**(11b) ethyl 2-azido-4,4-dichloro-2-phenylbutanoate**

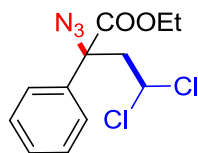

The title compound was prepared according to the general procedure described above by the reaction of 2-phenylacrylate (**10**) with  $\text{TMSN}_3$  and dichloromethane, and purified by flash column chromatography as colorless oil (45.7 mg, 76%).

$^1\text{H}$  NMR (400 MHz,  $\text{CDCl}_3$ )  $\delta$  7.47 – 7.37 (m, 5H), 5.91 (dd,  $J = 8.8, 3.7$  Hz, 1H), 4.40 – 4.28 (m, 2H), 3.23 (dd,  $J = 15.1, 8.8$  Hz, 1H), 2.93 (dd,  $J = 15.1, 3.7$  Hz, 1H), 1.34 (t,  $J = 7.1$  Hz, 3H);  $^{13}\text{C}$  NMR (100 MHz,  $\text{CDCl}_3$ )  $\delta$  170.1, 137.0, 129.4, 129.2, 125.9, 70.2, 68.8, 63.0, 51.0, 14.0. IR ( $\text{cm}^{-1}$ ): 2960, 2360, 2110, 1736, 1448, 1201.699. HRMS: calcd. for  $\text{C}_{12}\text{H}_{13}\text{Cl}_2\text{N}_3\text{O}_2\text{Na}^+$   $[\text{M}+\text{Na}]^+$ : 324.0277, Found: 324.0256.

**(11c) ethyl 2-azido-4,4,4-trichloro-2-phenylbutanoate**

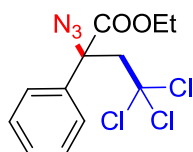

The title compound was prepared according to the general procedure described above by the reaction of 2-phenylacrylate (**10**) with  $\text{TMSN}_3$  and trichloromethane, and purified by flash column chromatography as colorless oil (46.2 mg, 69%).

$^1\text{H}$  NMR (400 MHz,  $\text{CDCl}_3$ )  $\delta$  7.51 – 7.37 (m, 5H), 4.43 – 4.27 (m, 2H), 4.02 (d,  $J = 15.5$  Hz, 1H), 3.45 (d,  $J = 15.5$  Hz, 1H), 1.33 (t,  $J = 7.1$  Hz, 3H);  $^{13}\text{C}$  NMR (100 MHz,  $\text{CDCl}_3$ )  $\delta$  169.9, 137.1, 129.4, 129.3, 126.1, 95.0, 71.0, 63.3, 59.5, 14.0. IR ( $\text{cm}^{-1}$ ): 2960, 2101, 1737, 1266, 1004, 699. HRMS: calcd. For  $\text{C}_{12}\text{H}_{12}\text{Cl}_3\text{N}_3\text{O}_2\text{Na}^+$   $[\text{M}+\text{Na}]^+$ : 357.9887, Found: 357.9844.

## VII. Copies of $^1\text{H}$ and $^{13}\text{C}$ NMR spectra of products

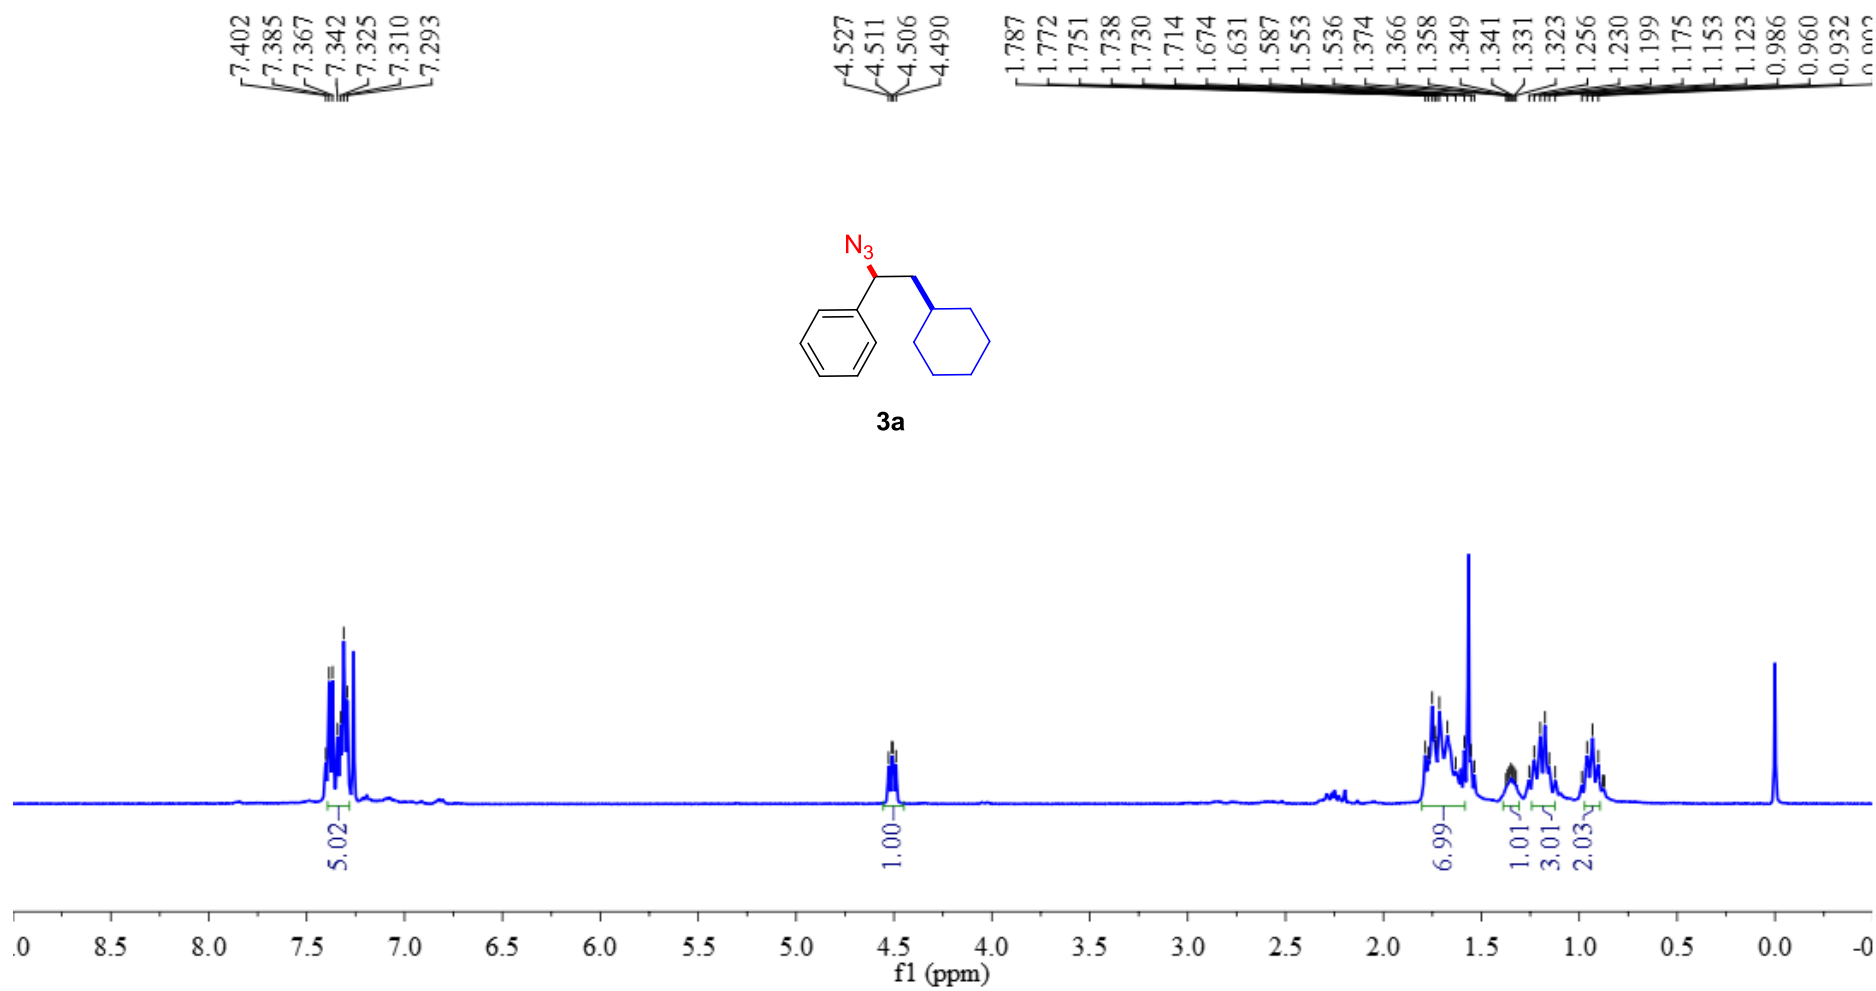

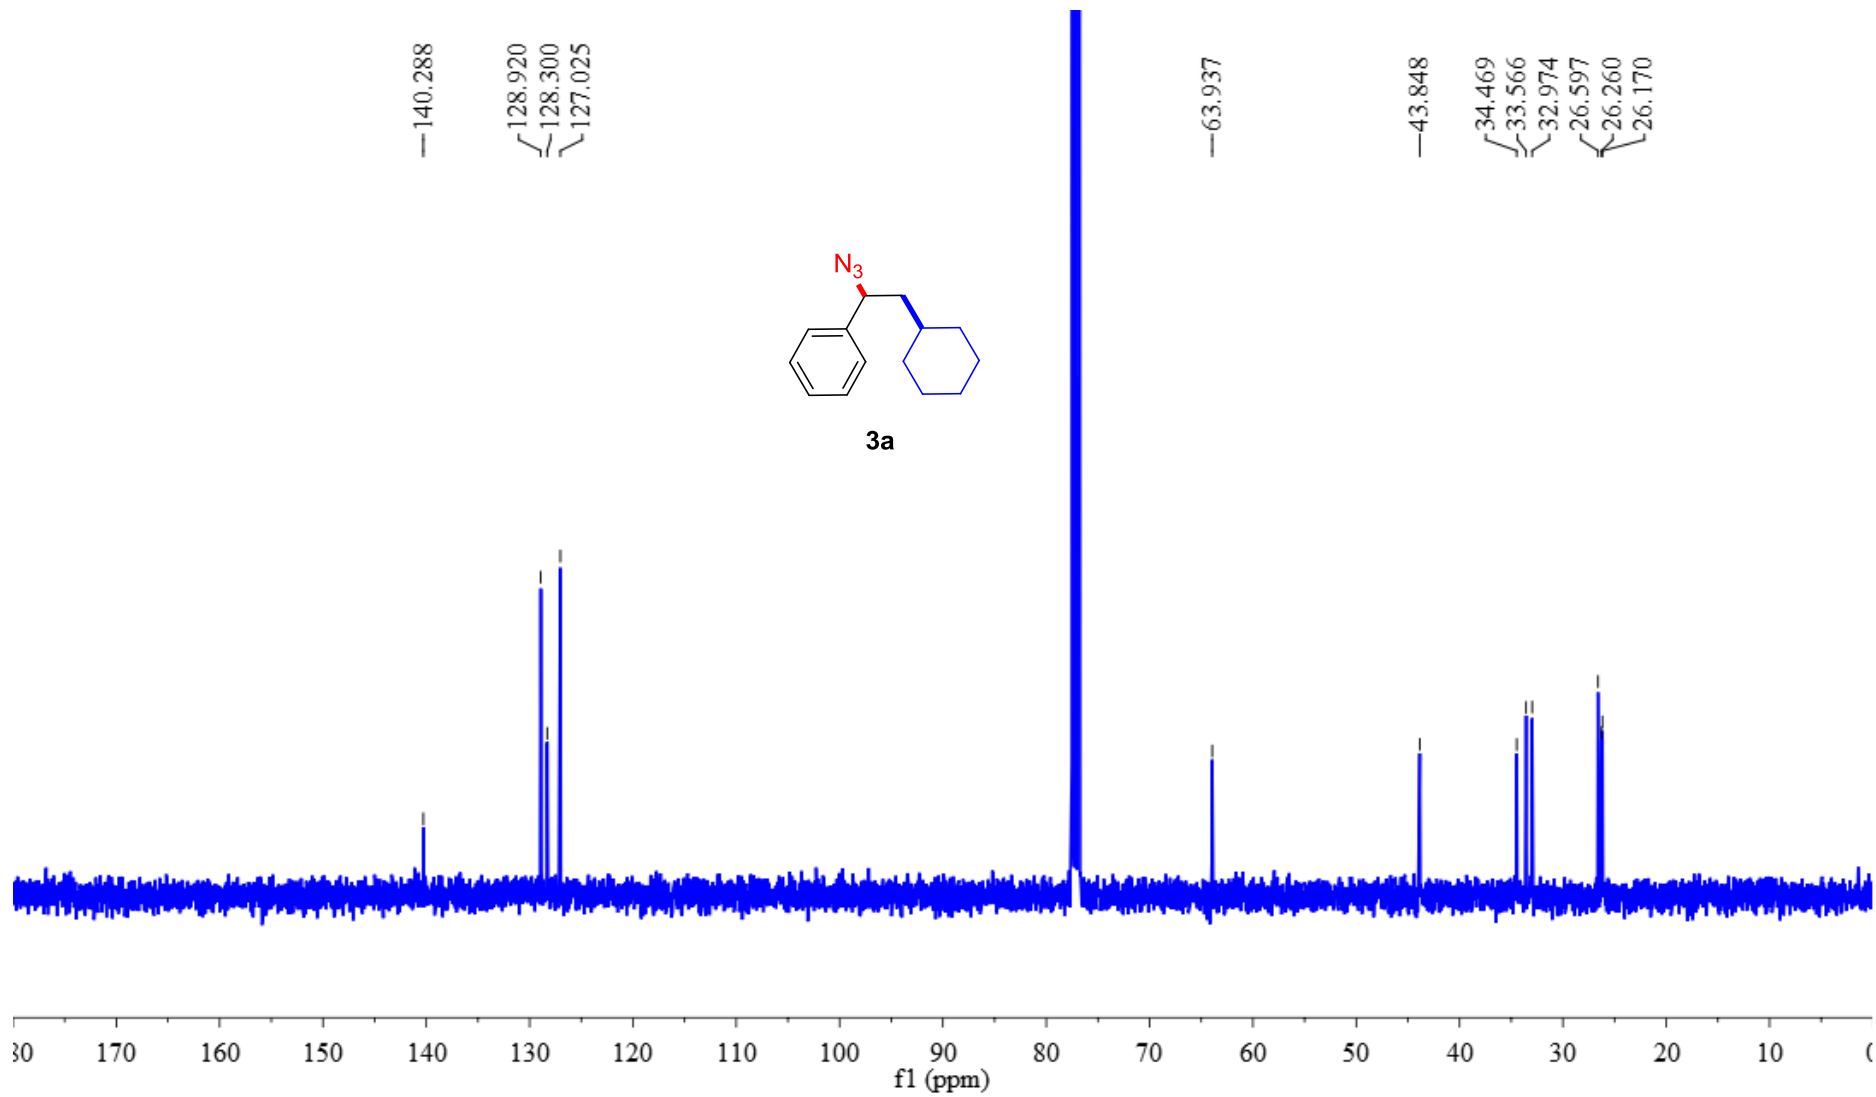

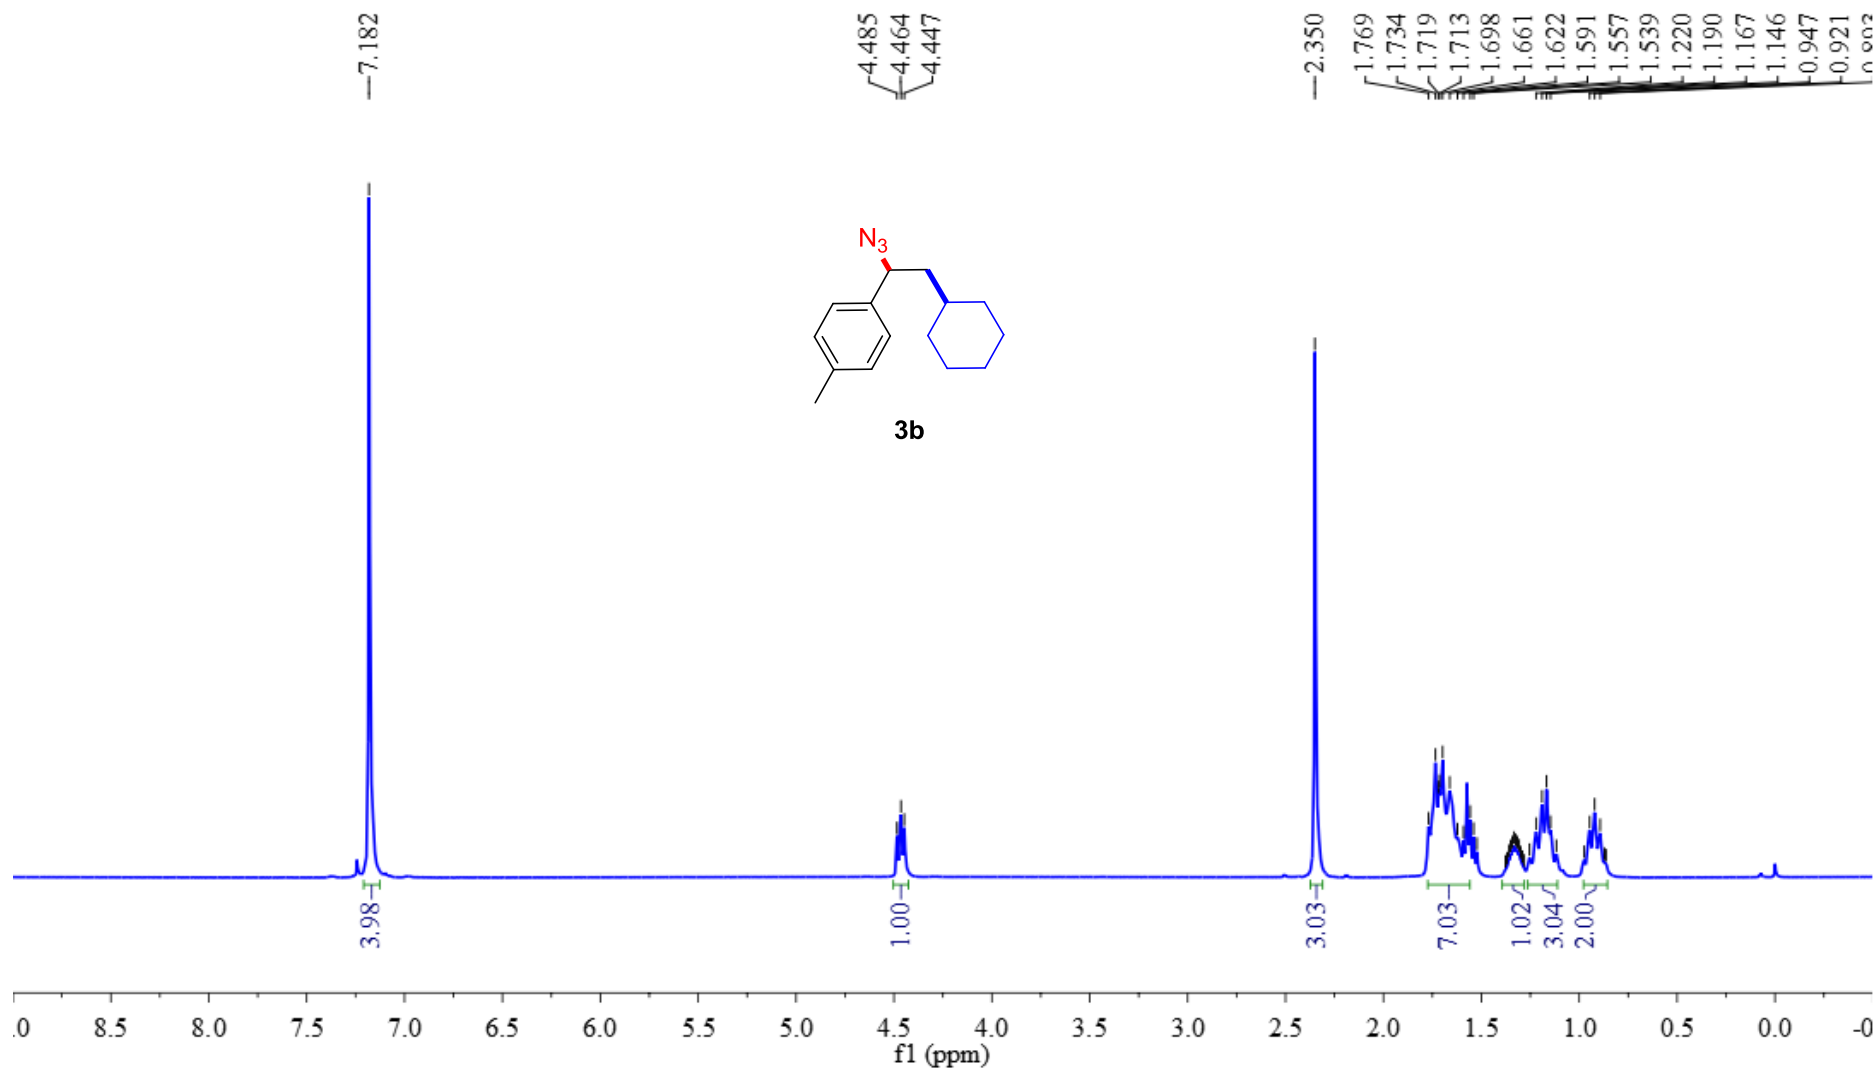



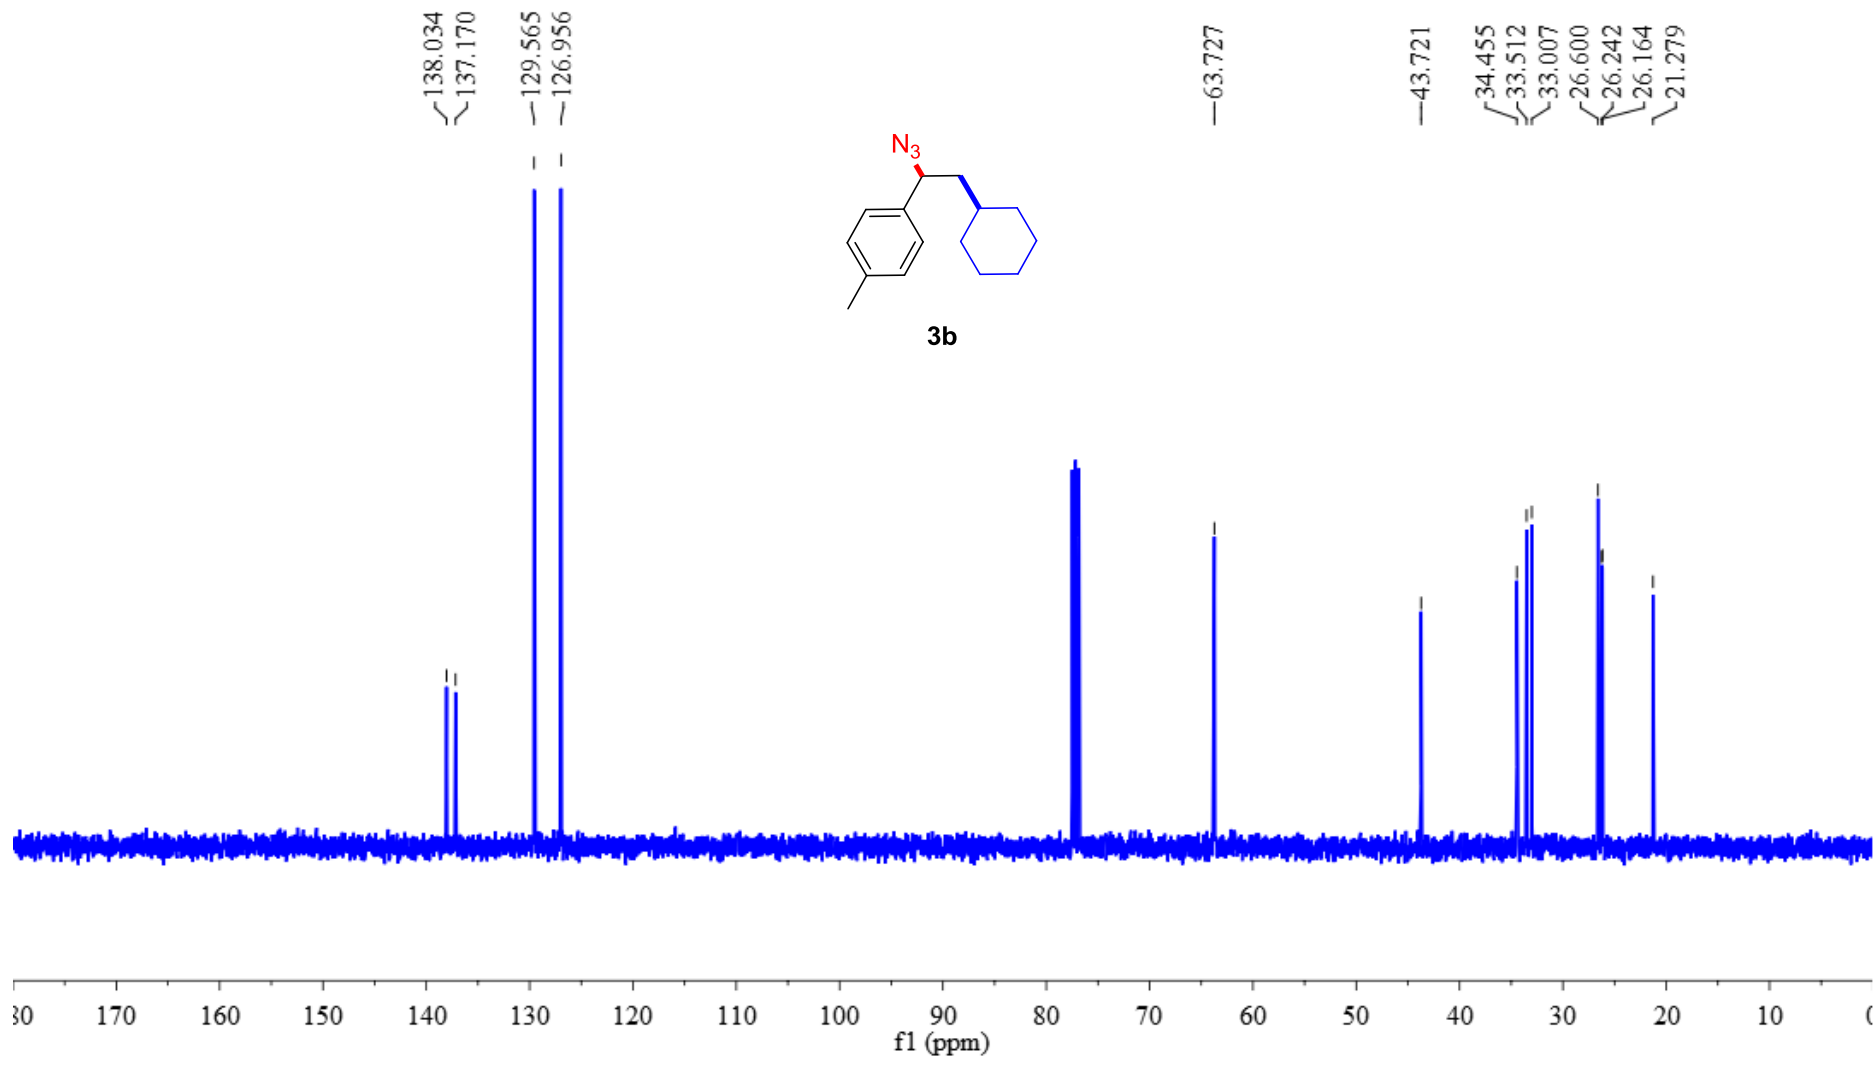

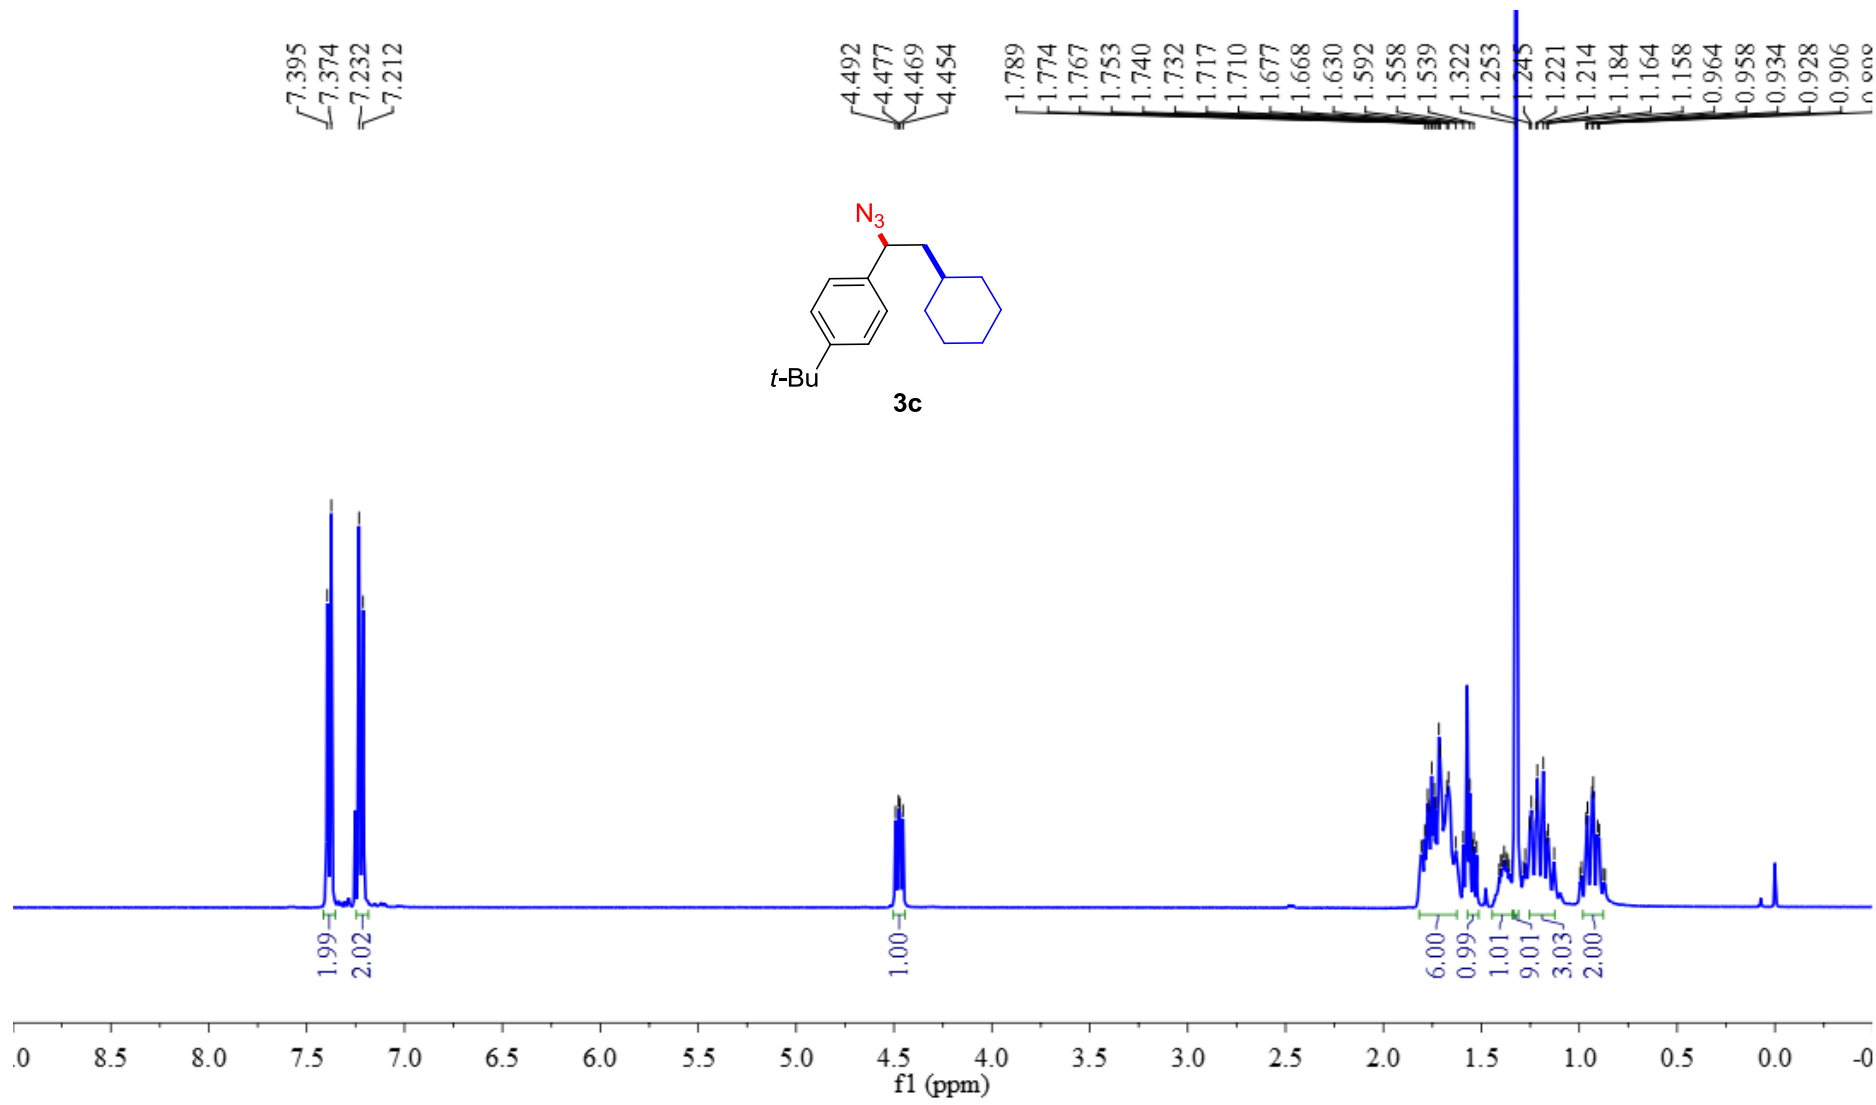

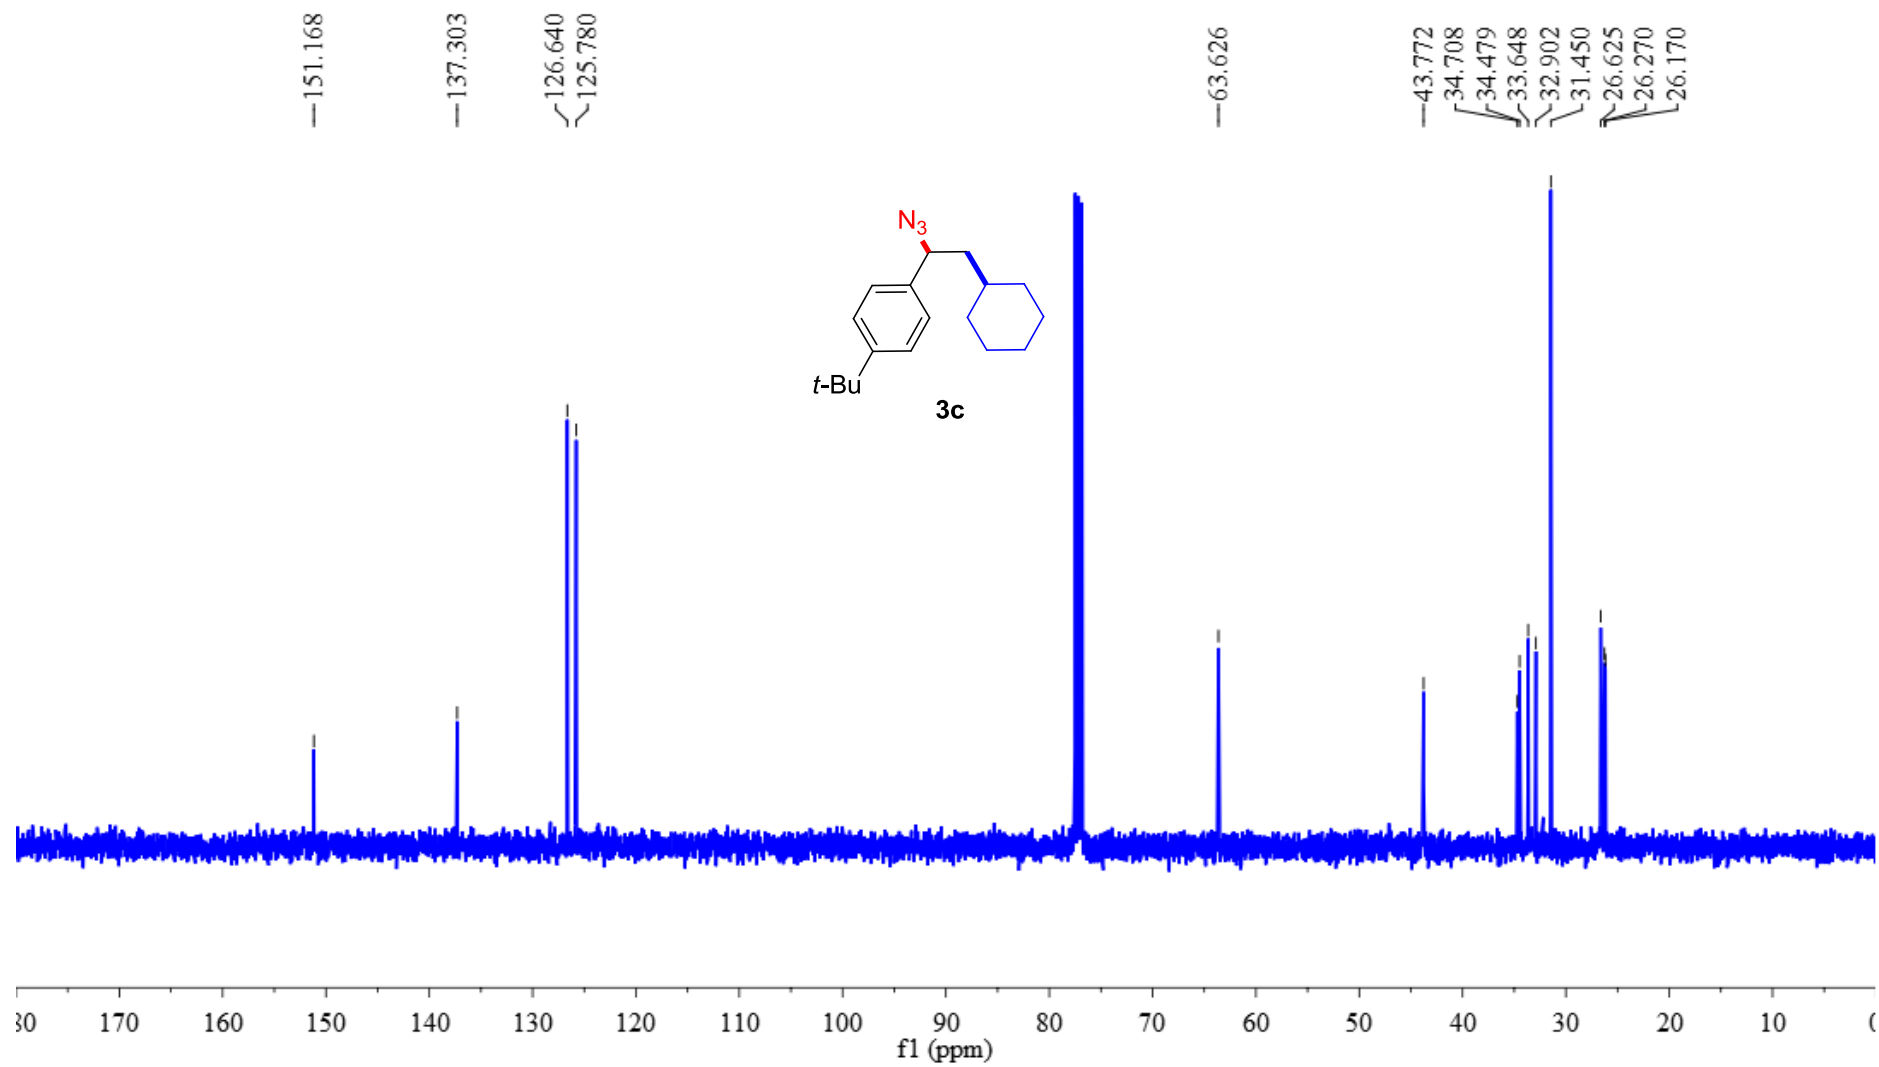

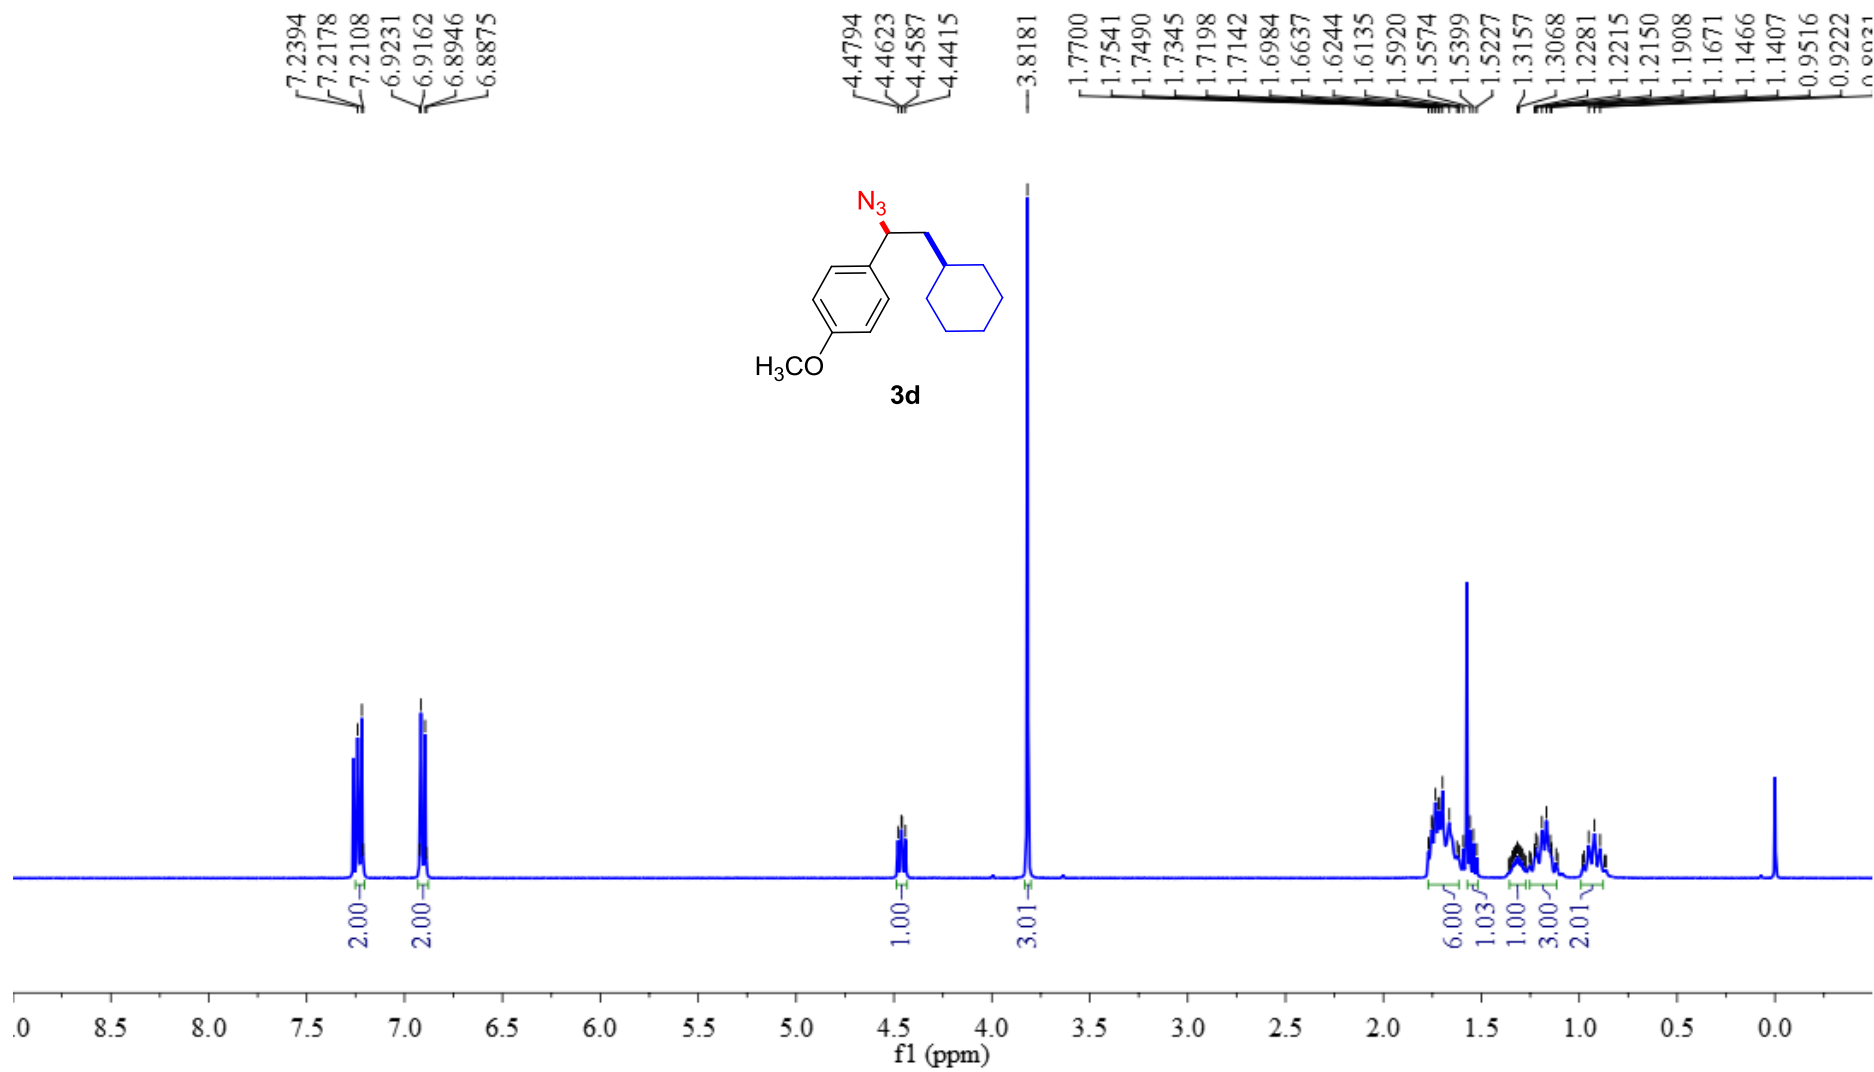

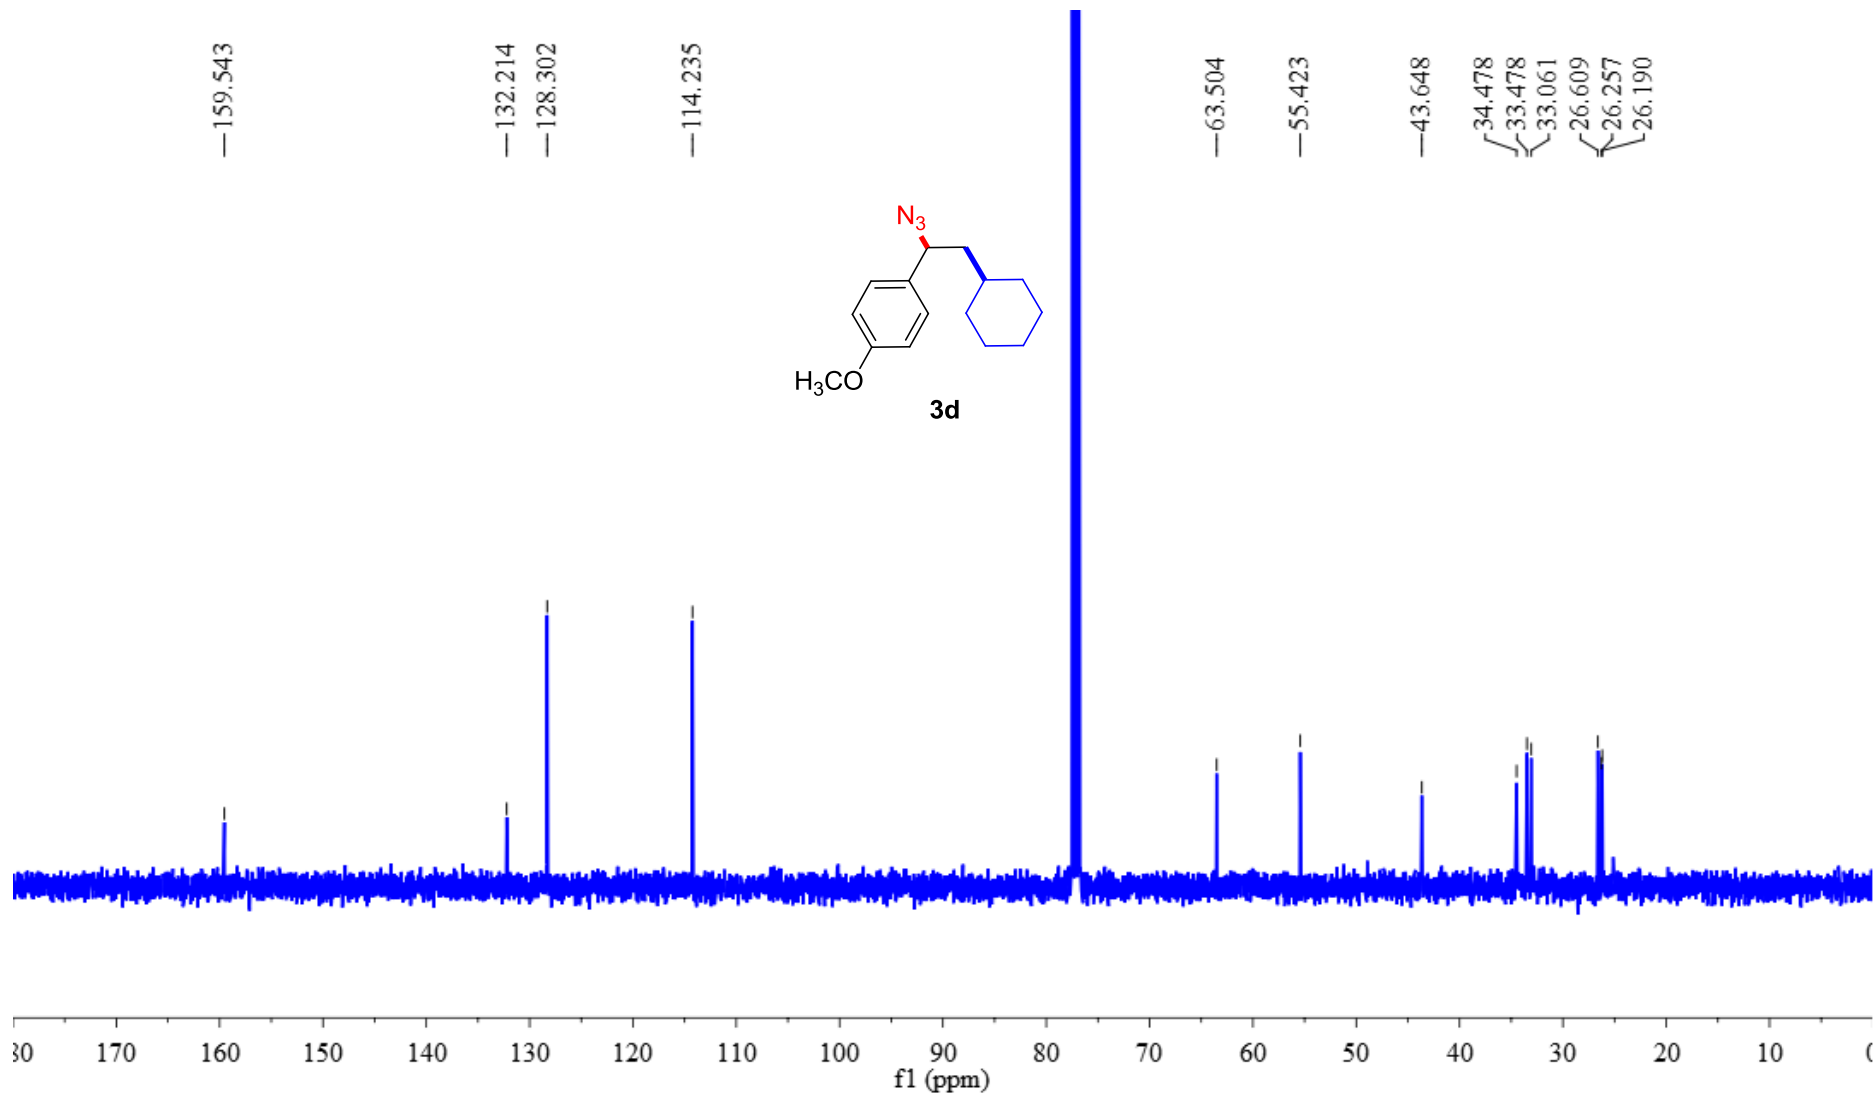

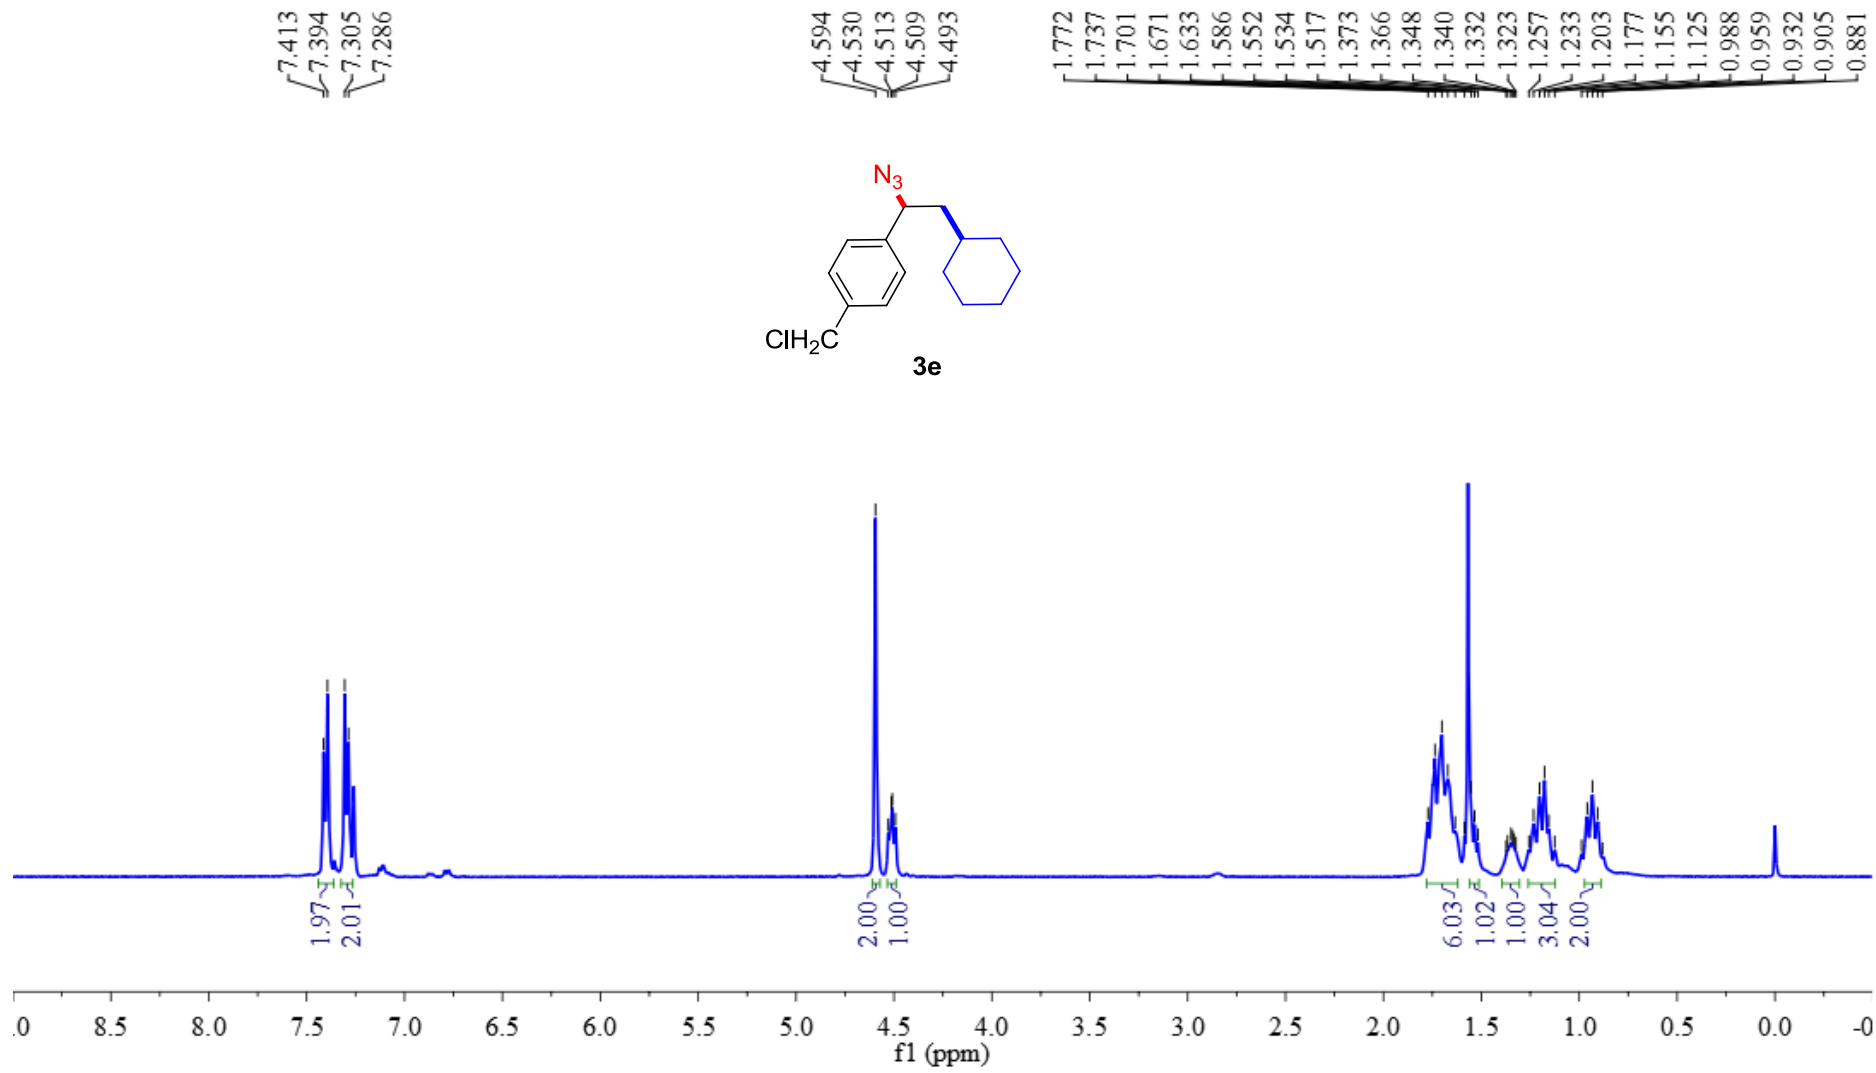

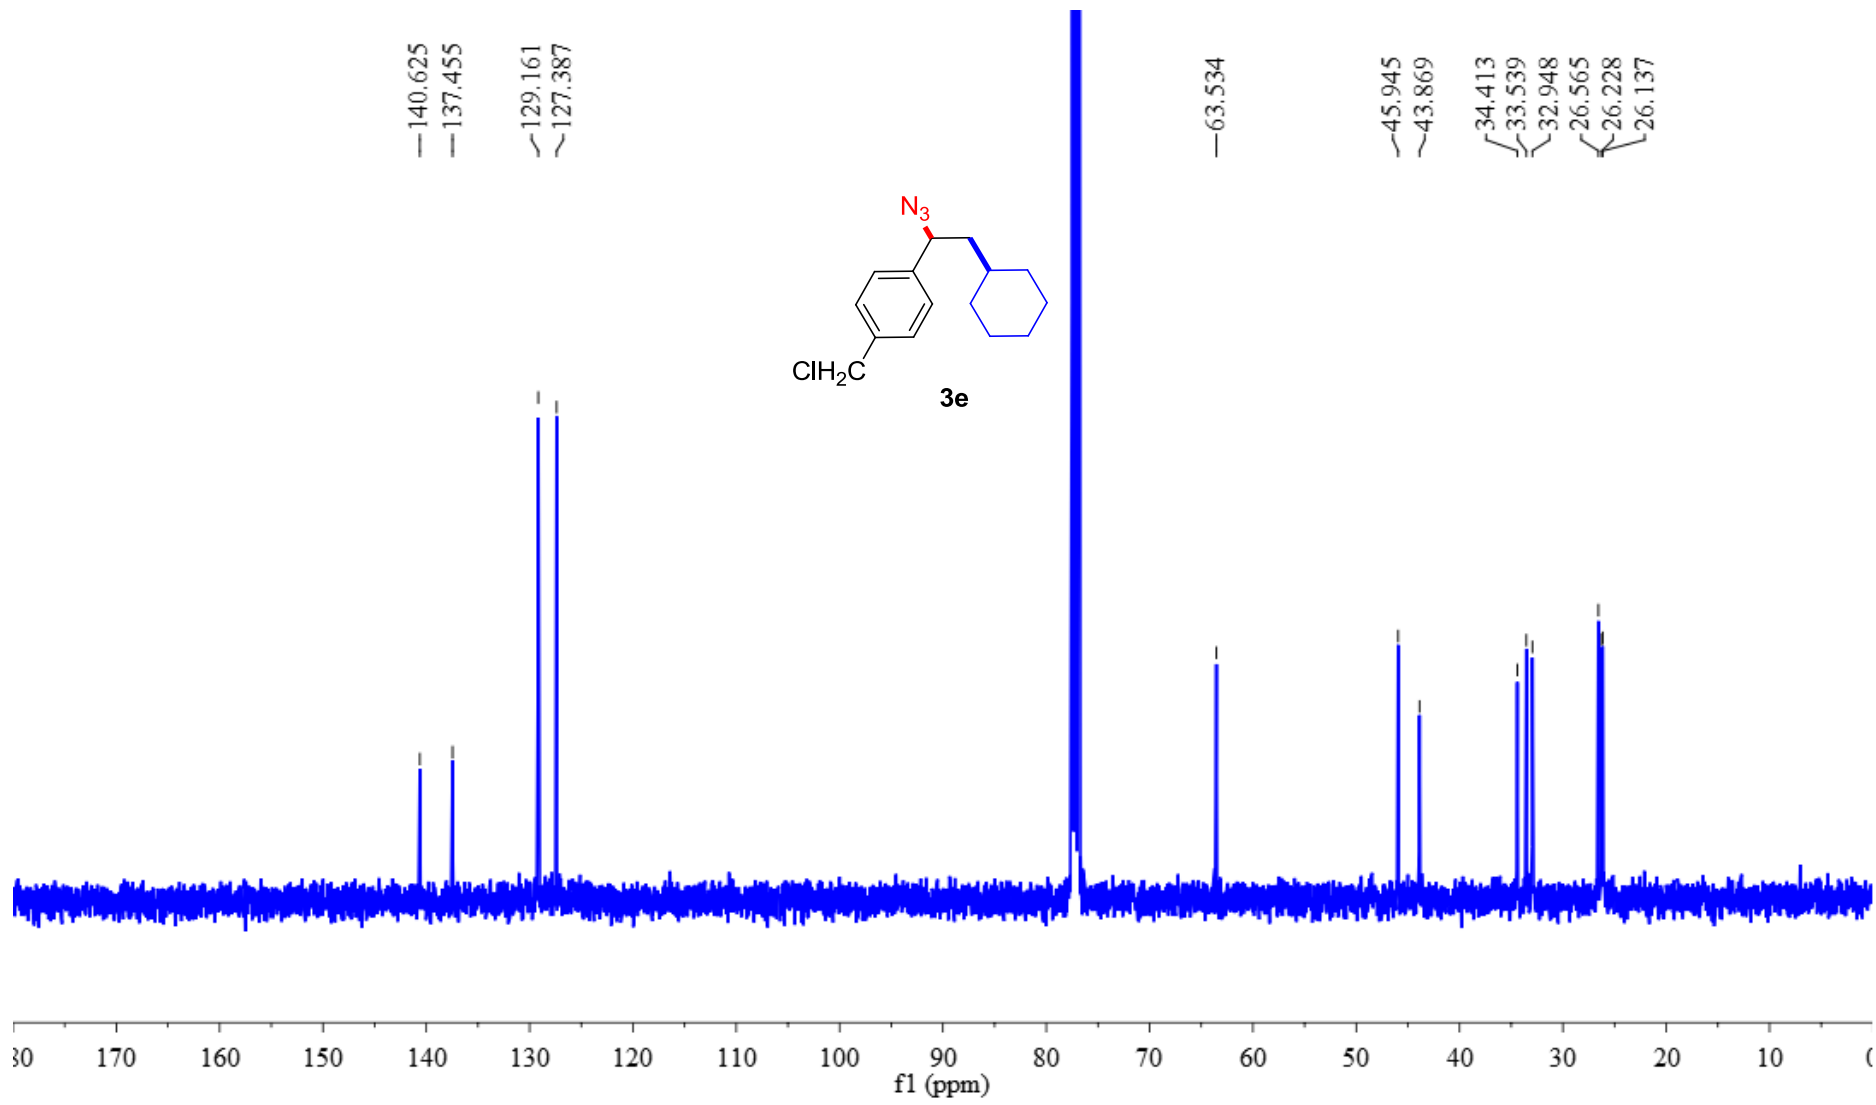

S30

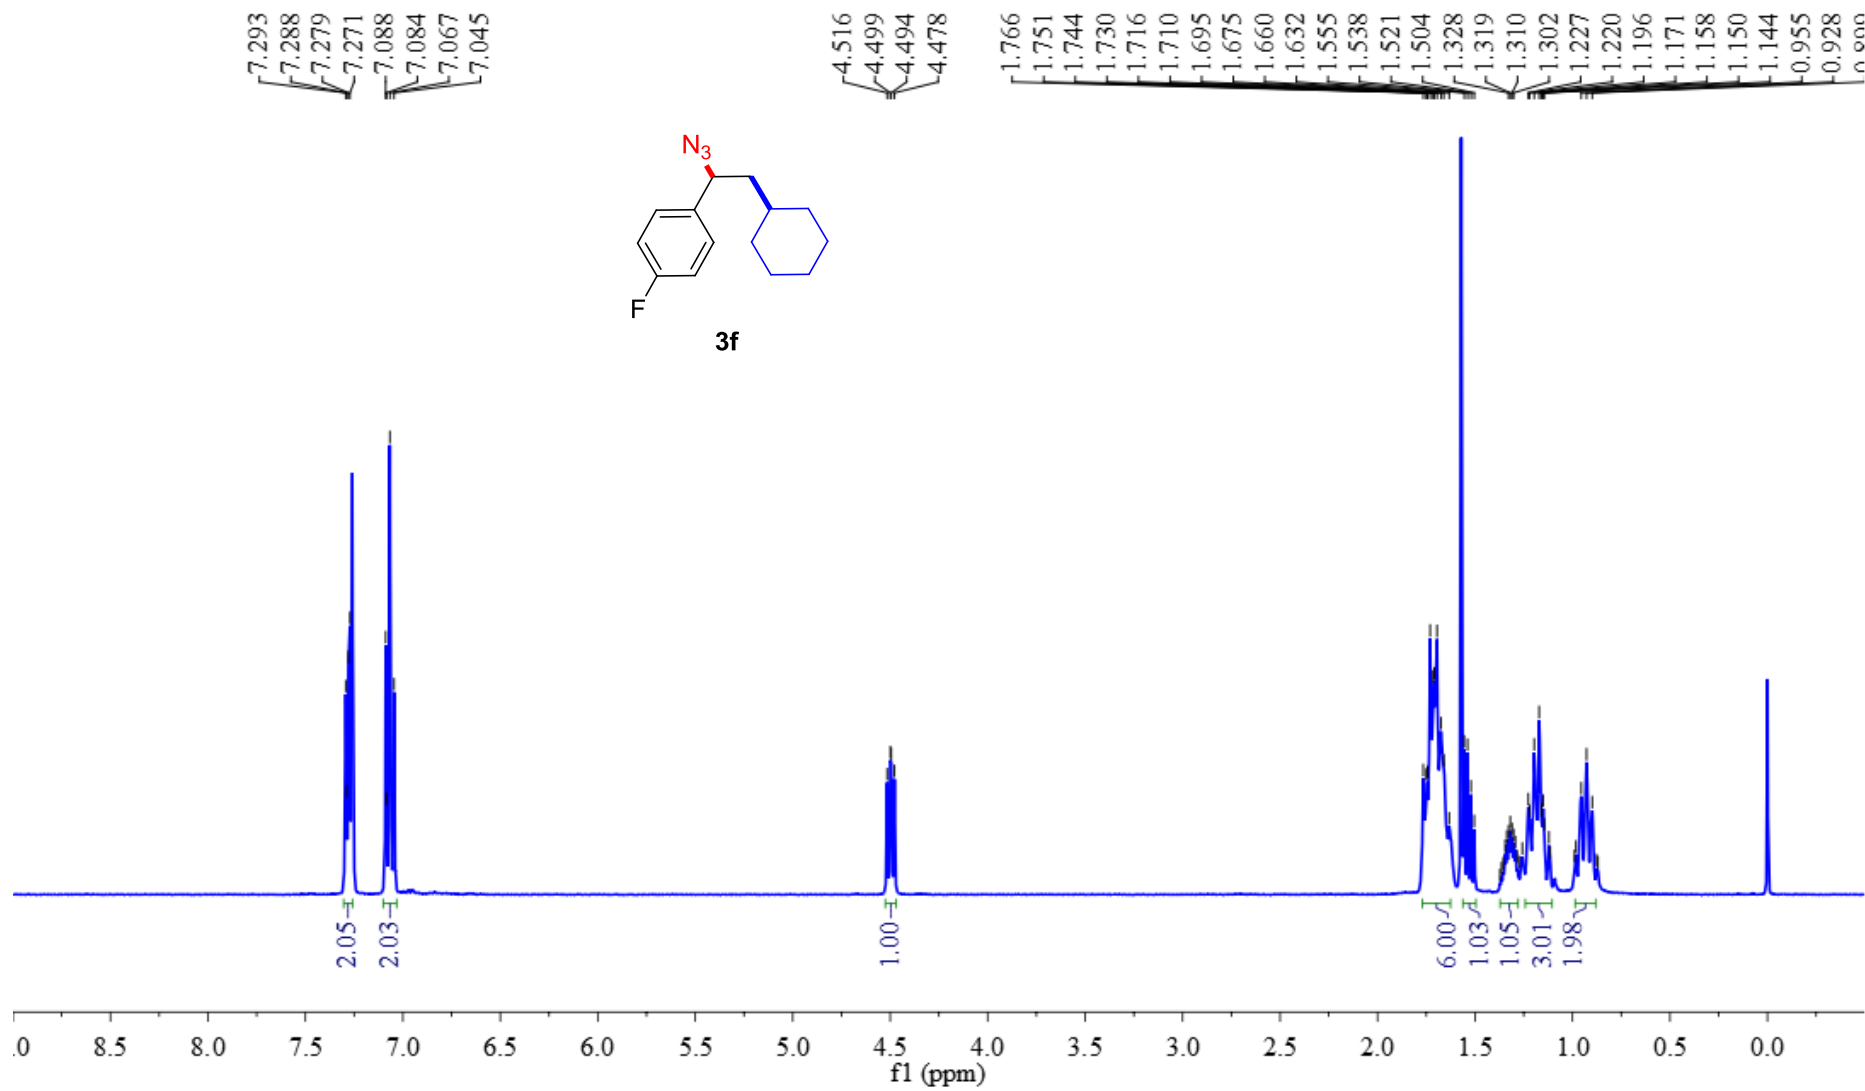



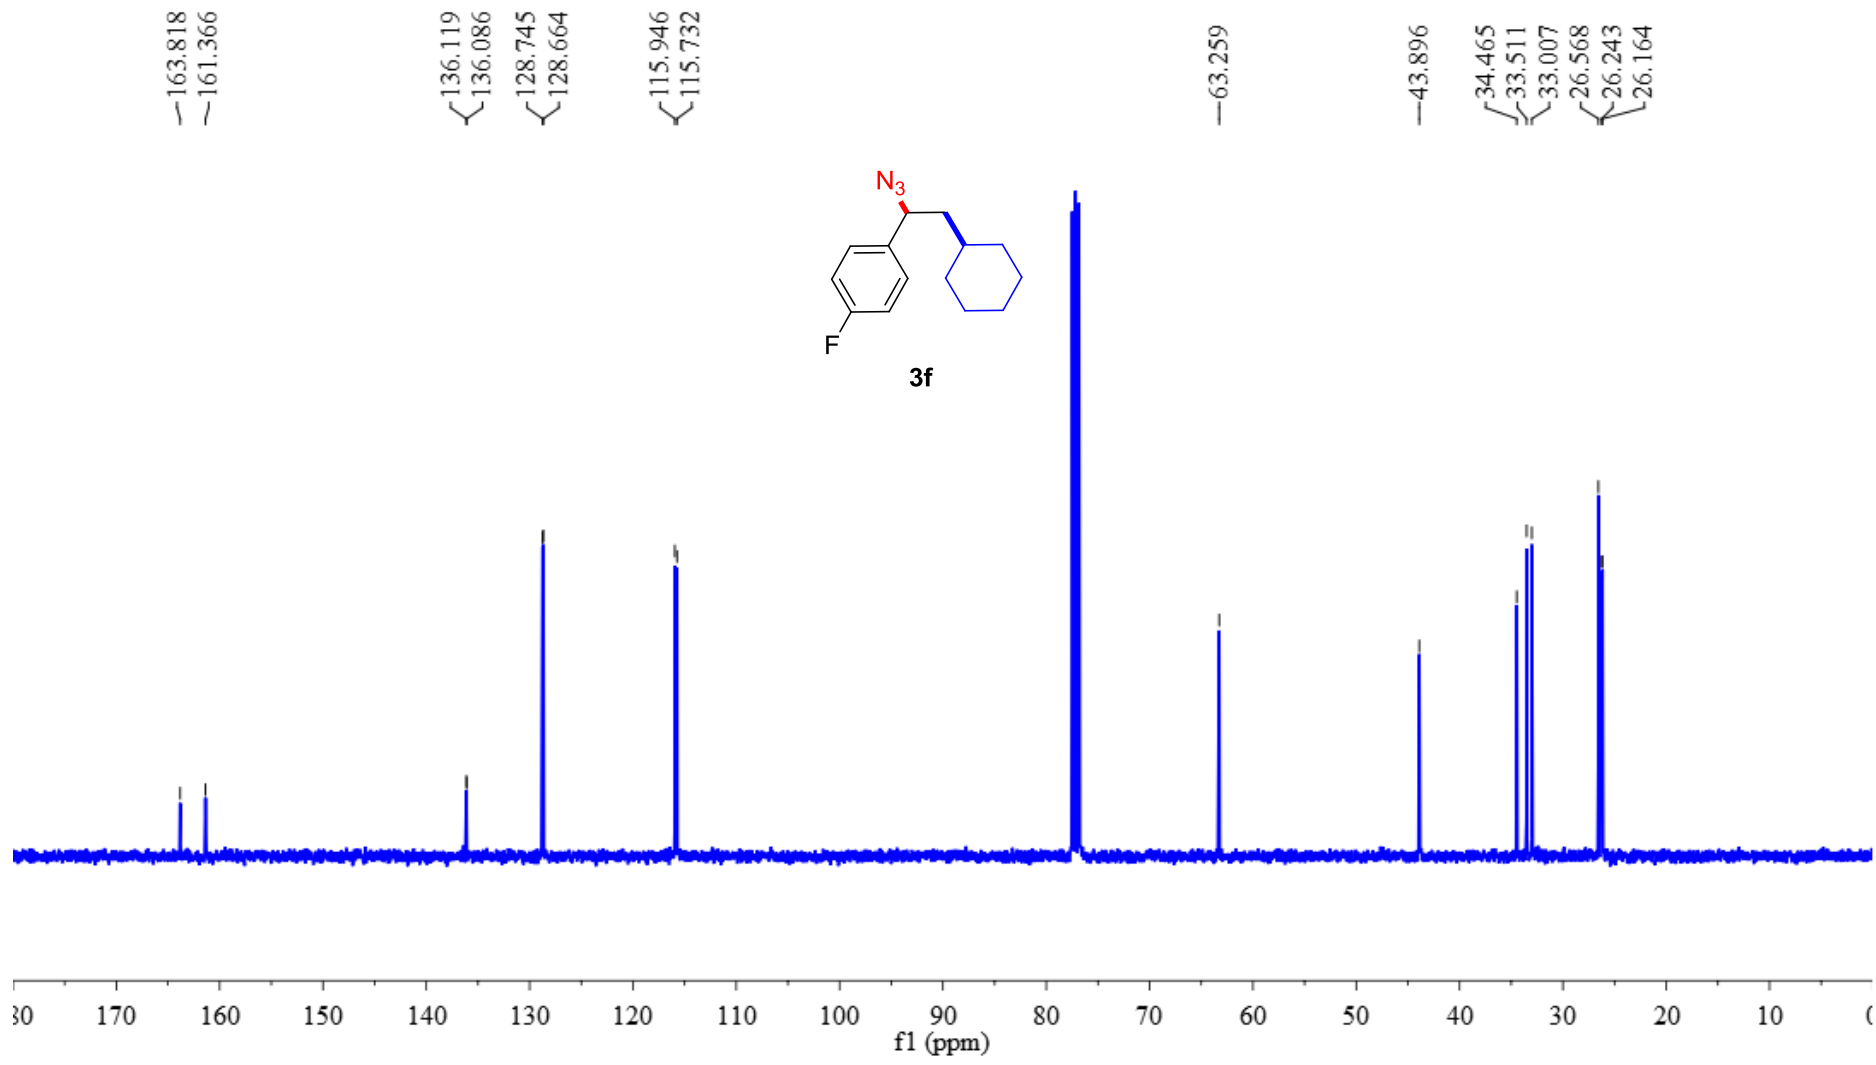

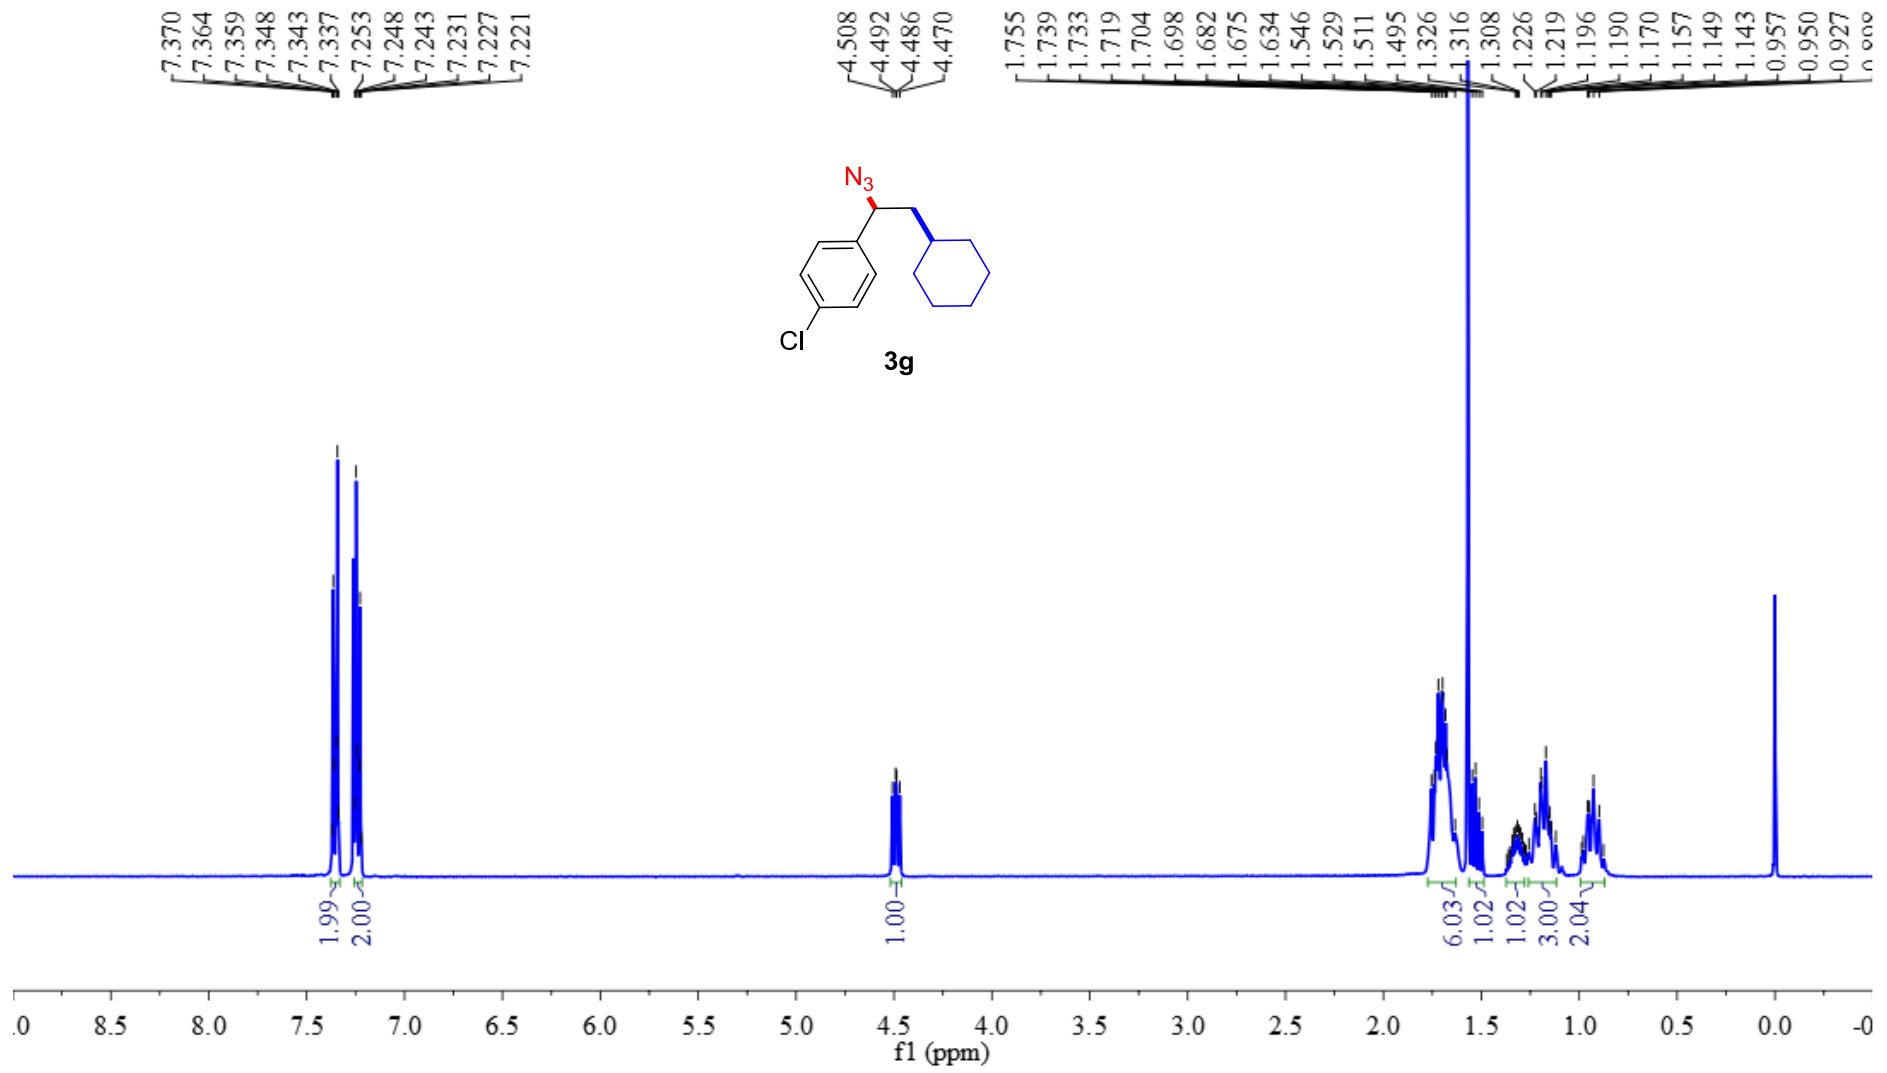

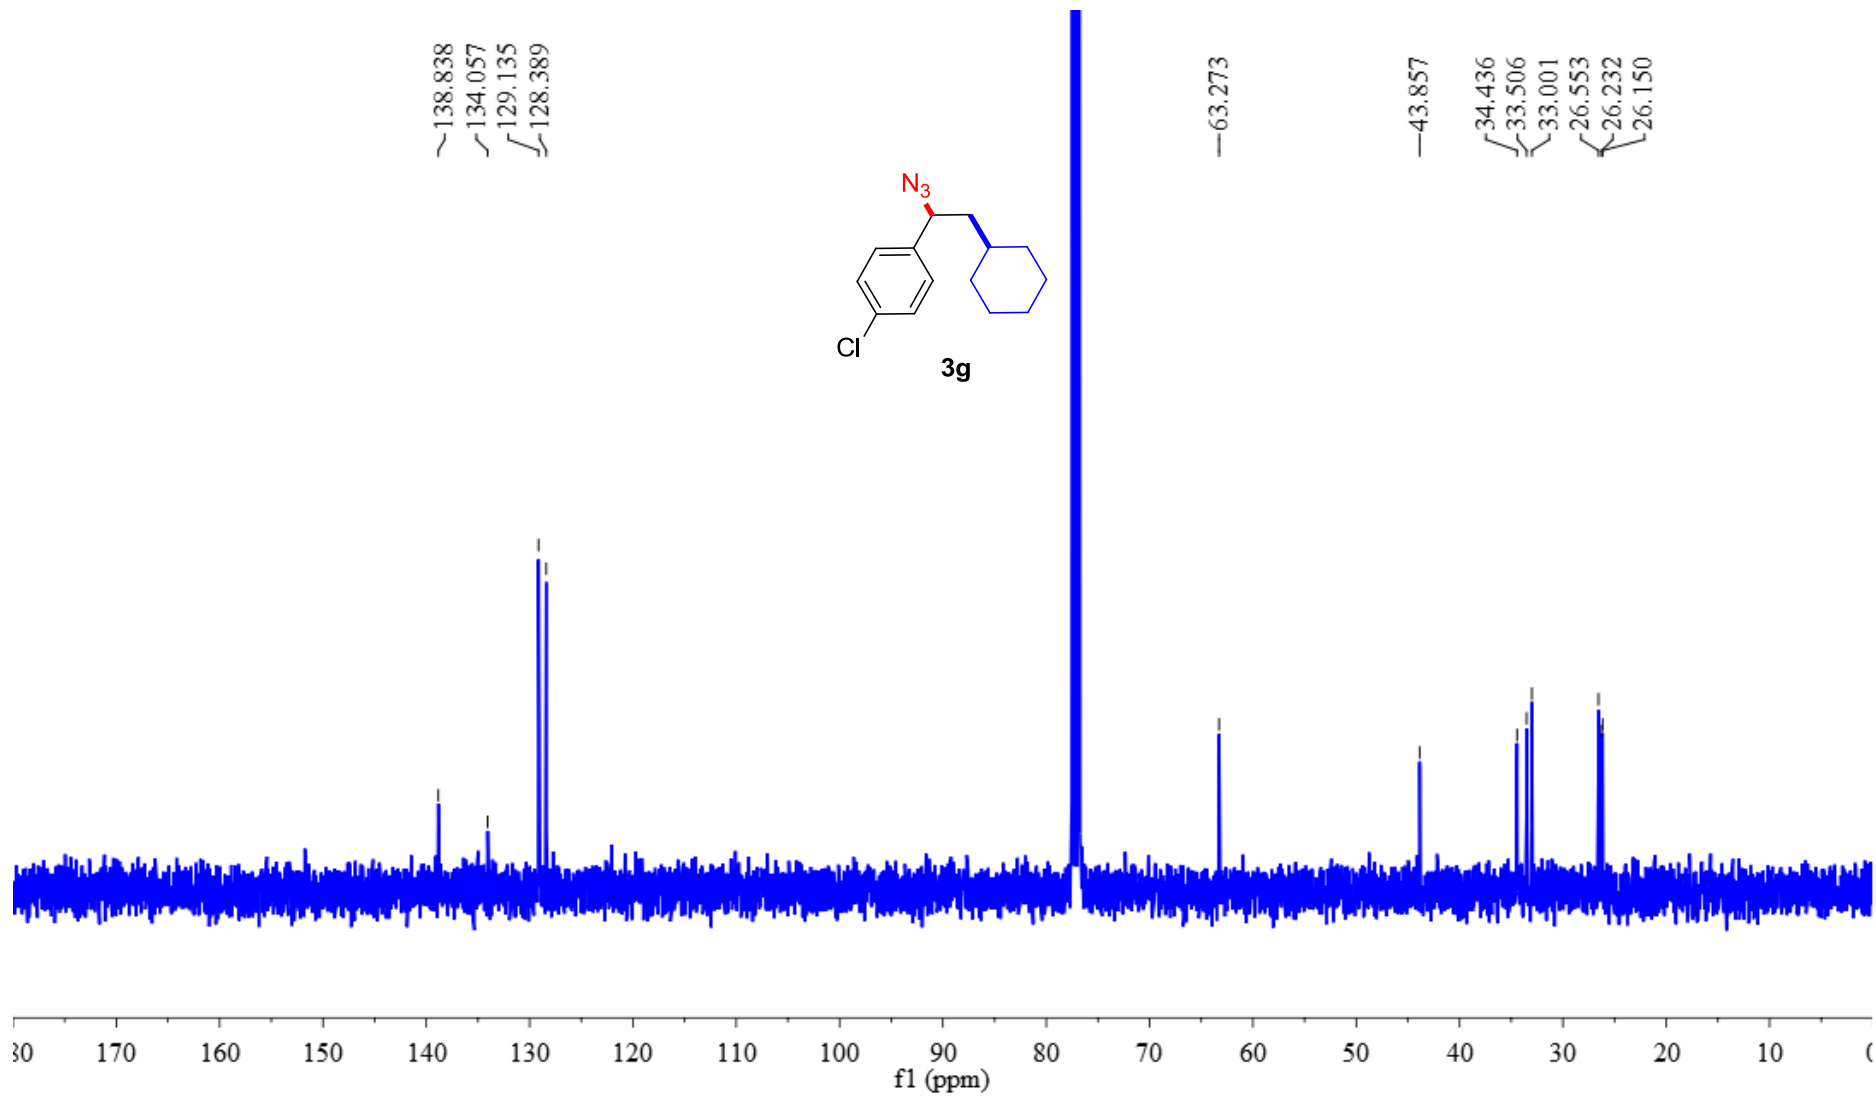

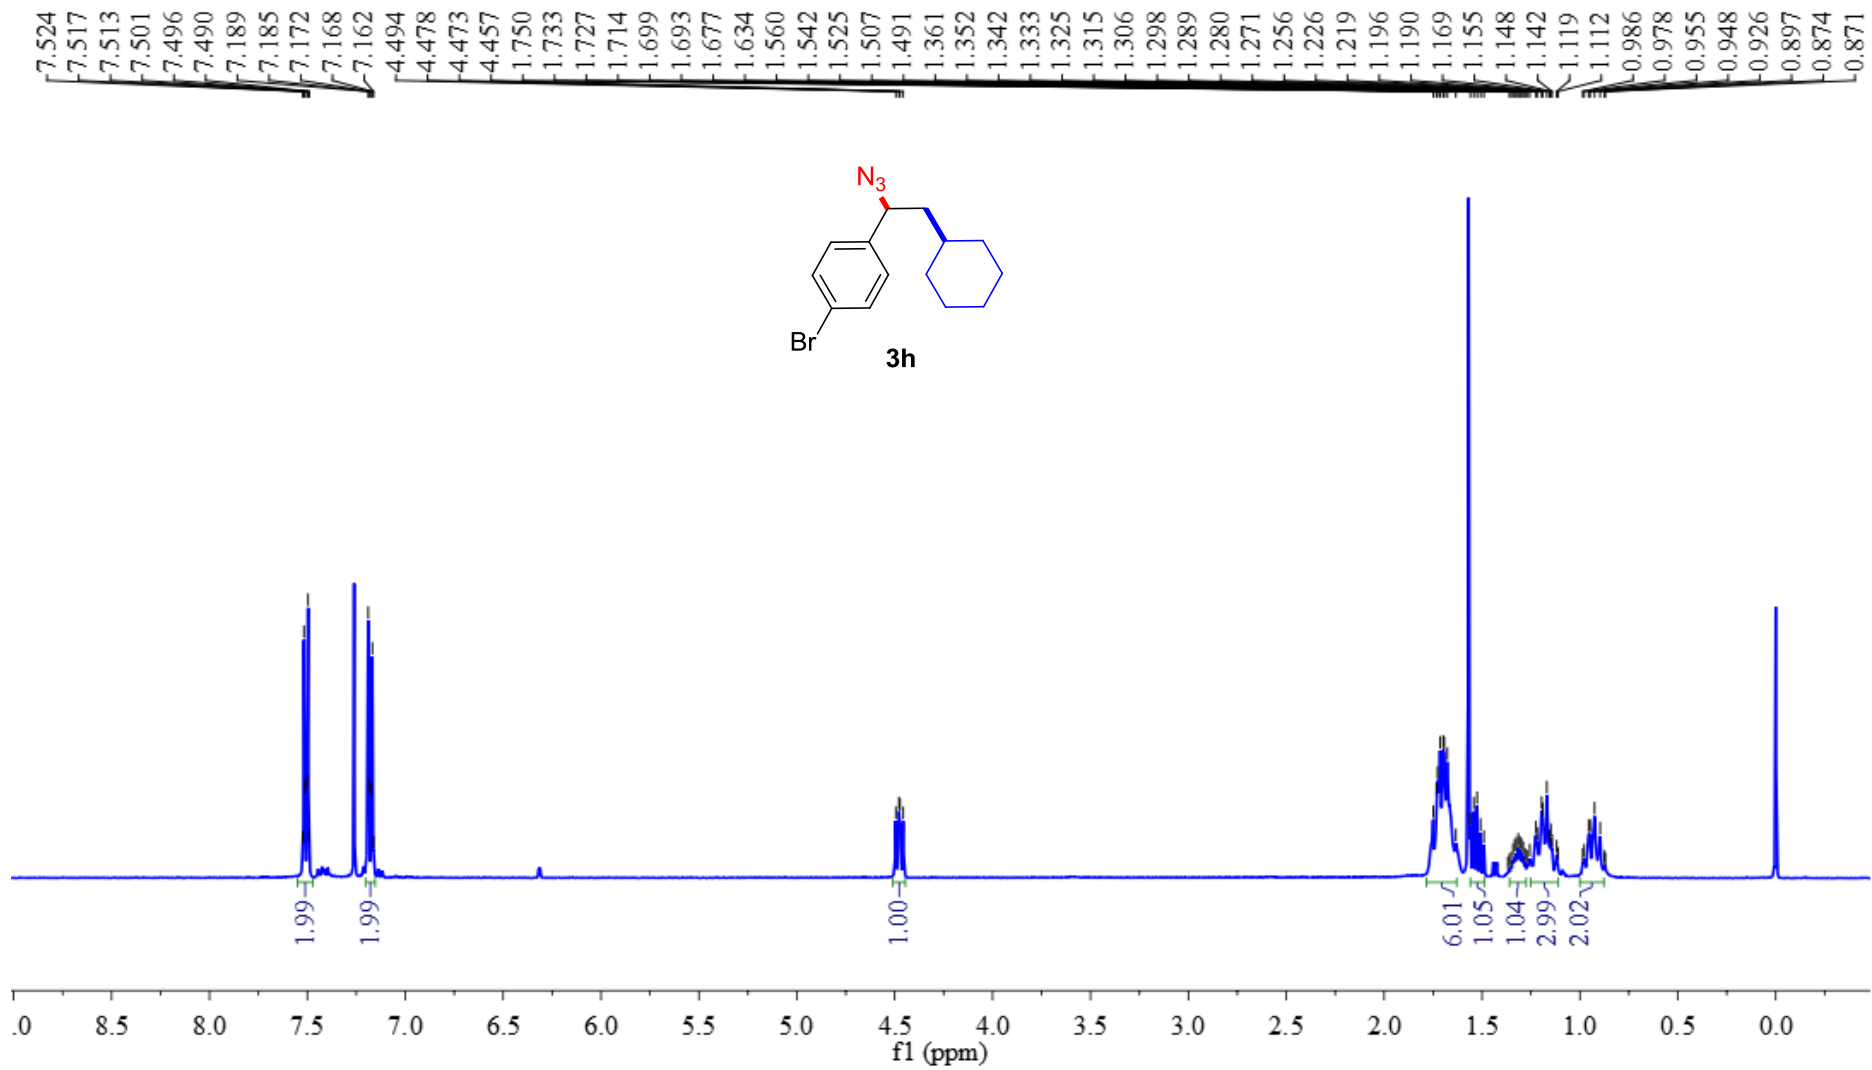

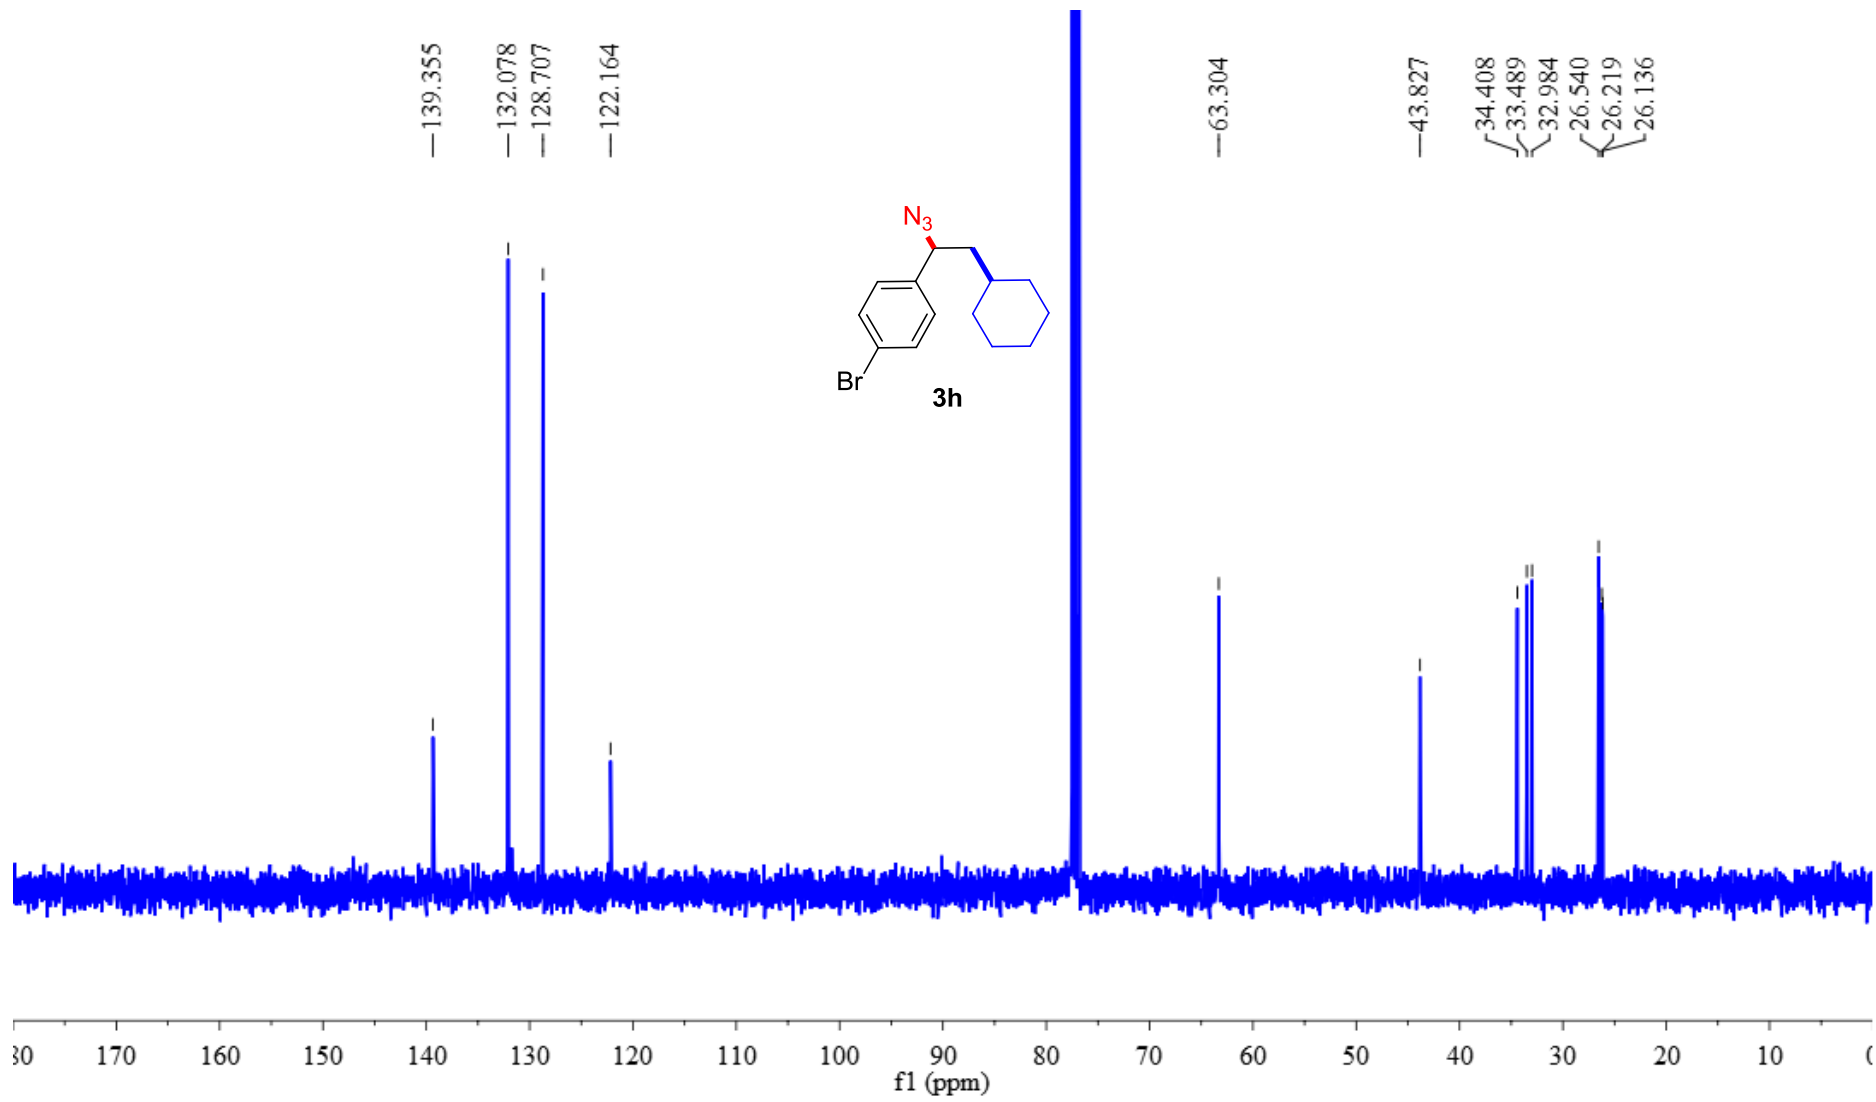

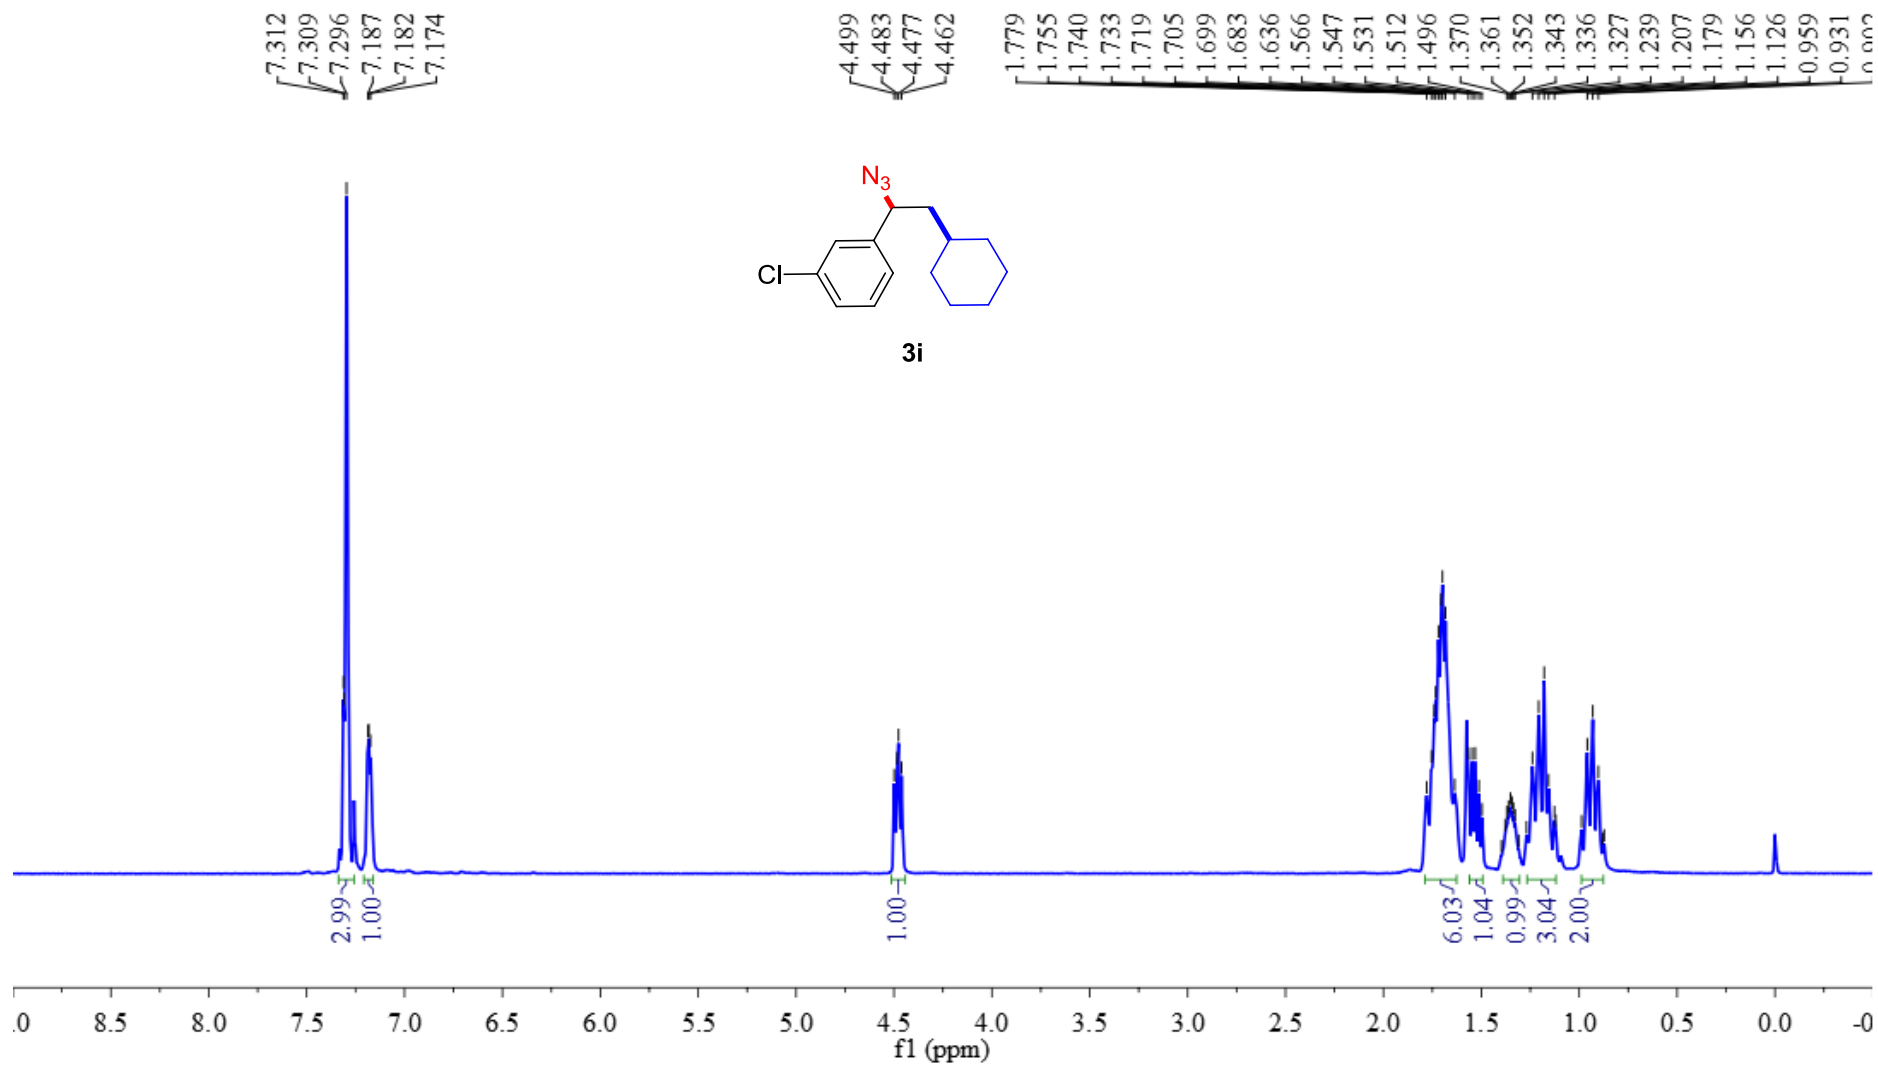

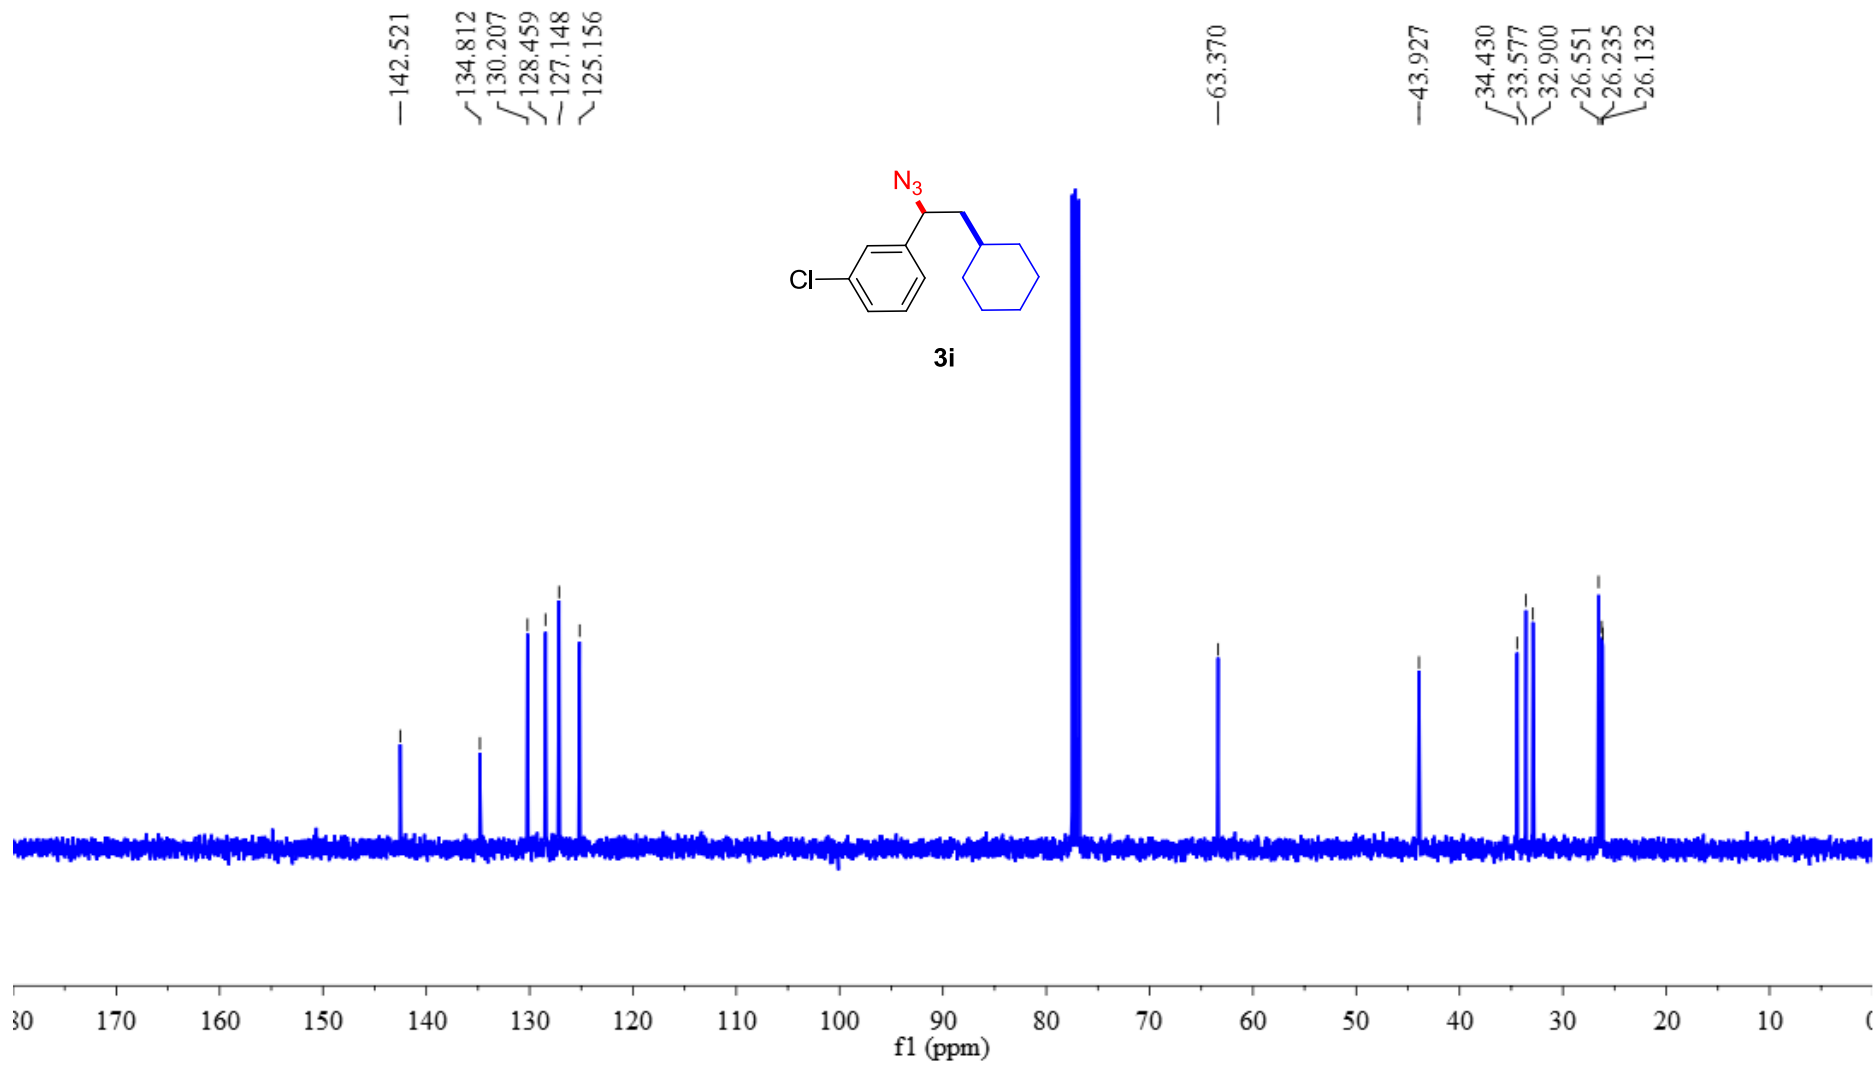

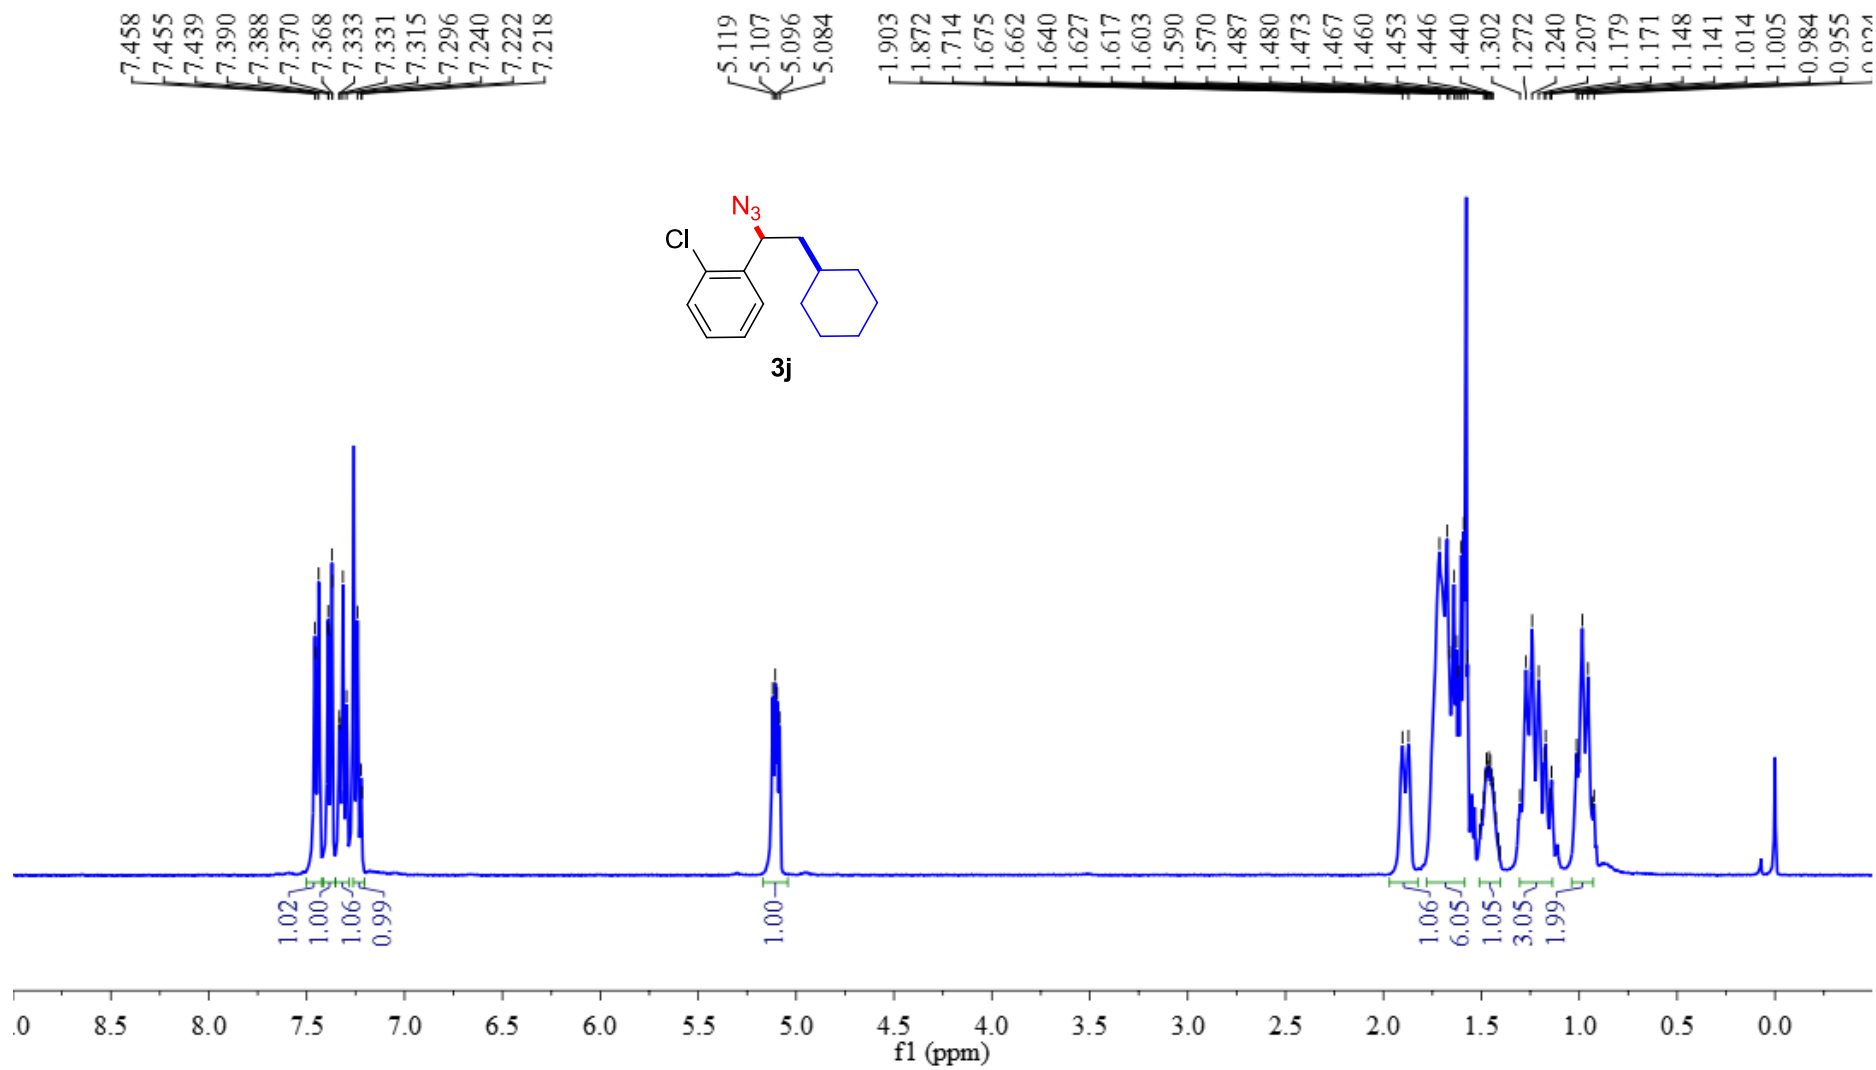



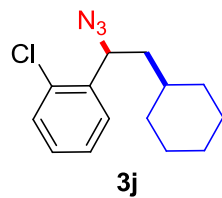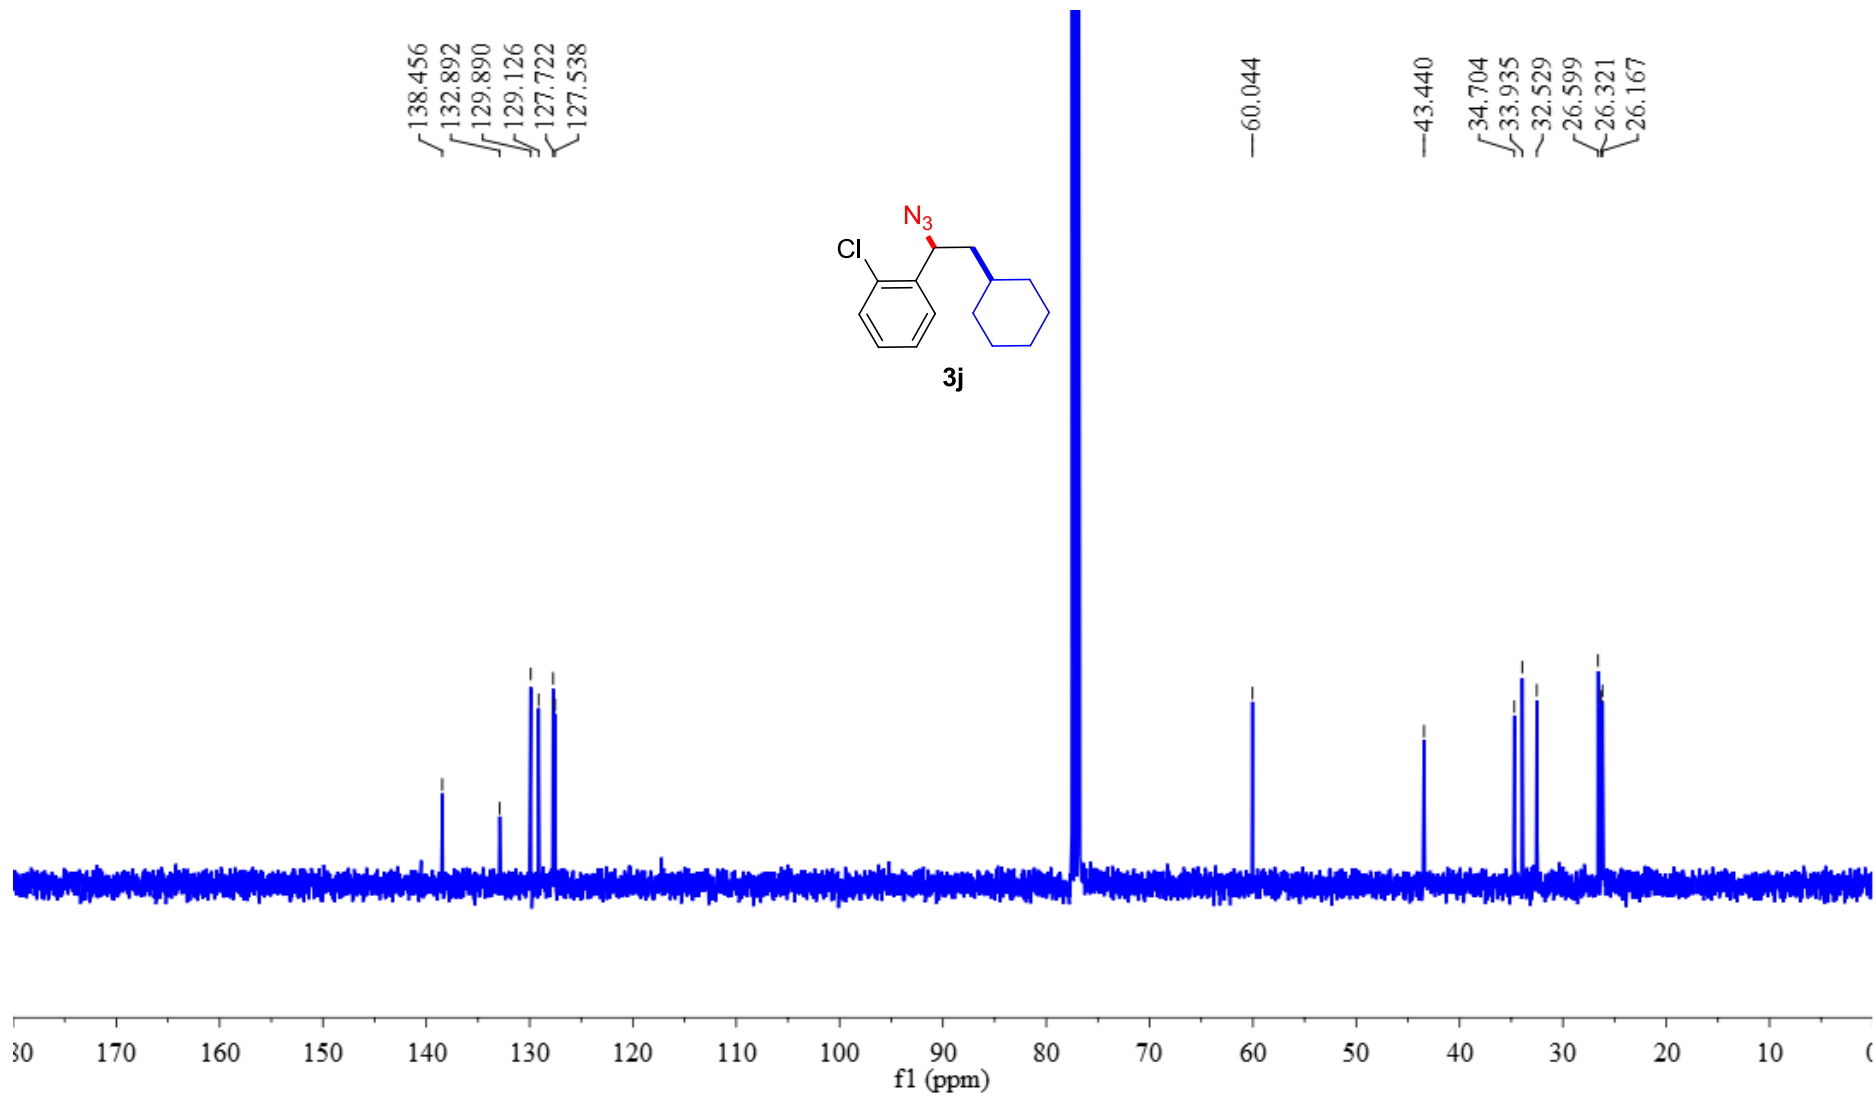

S40

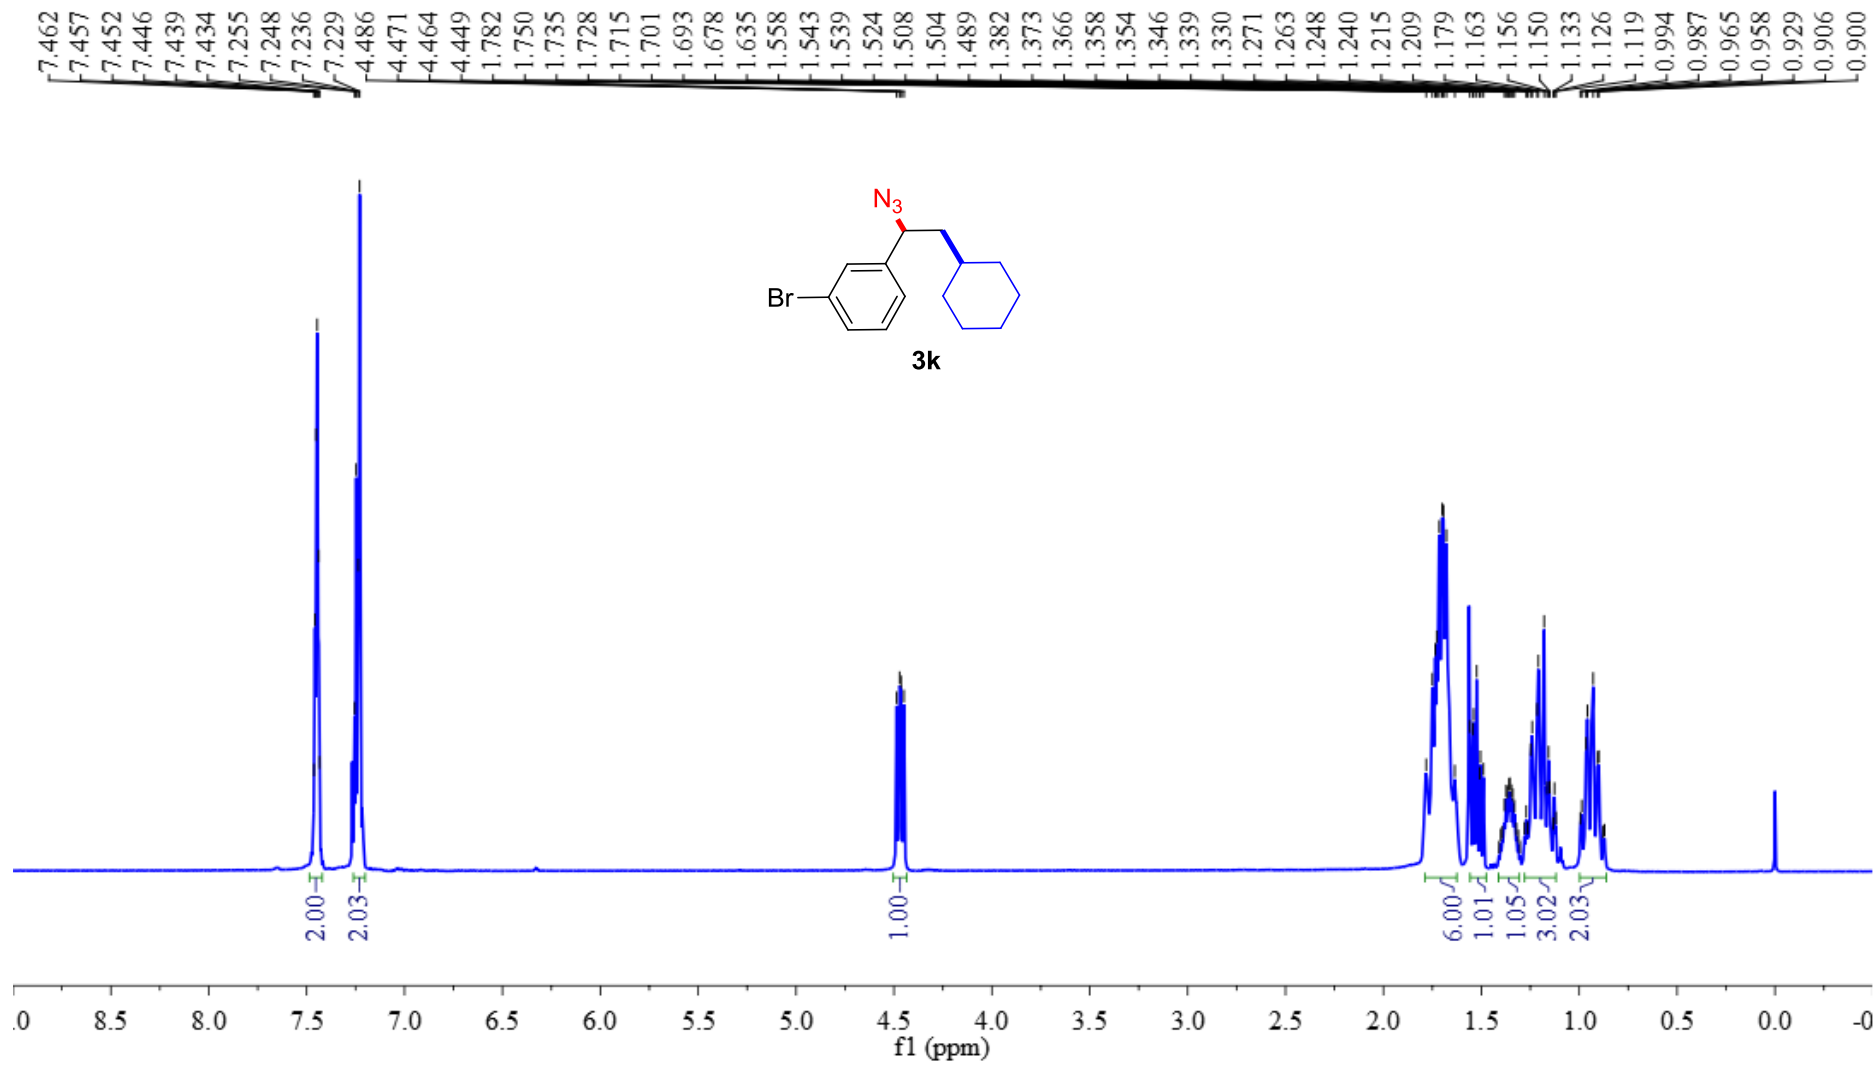

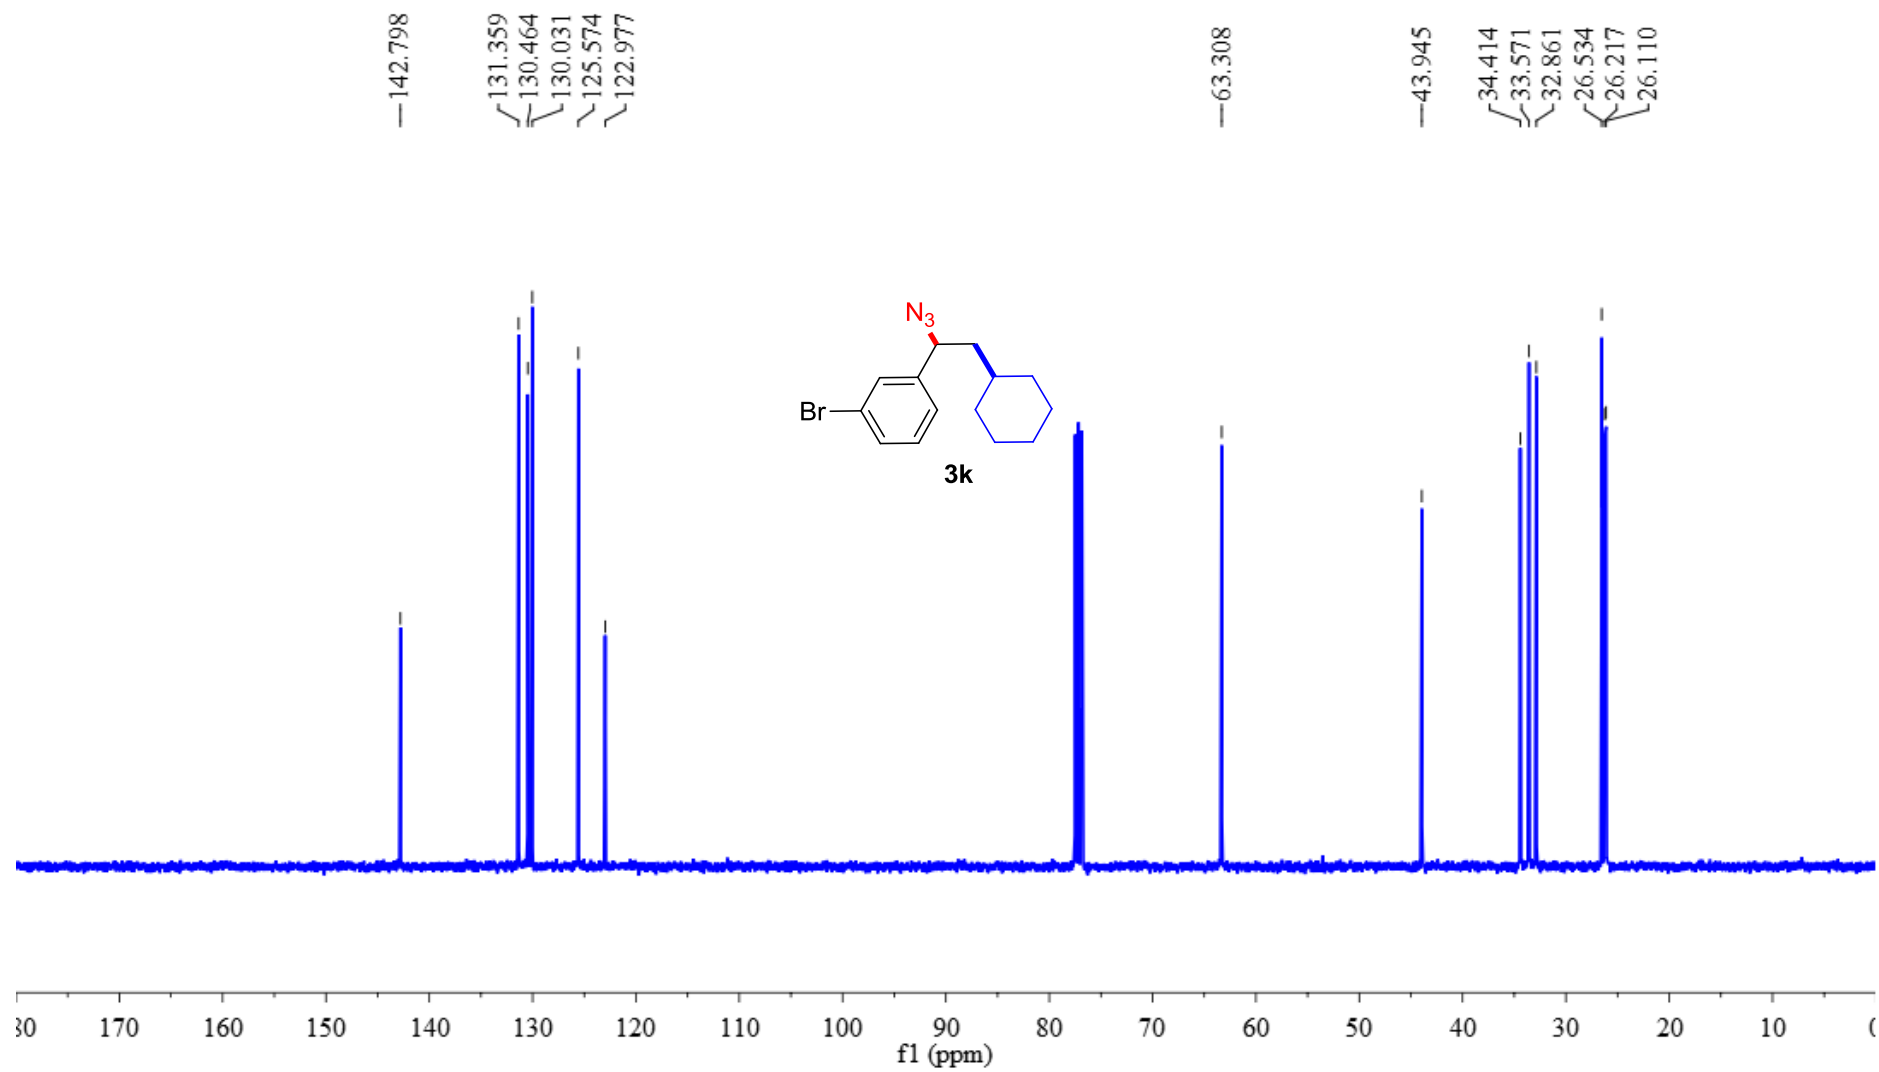

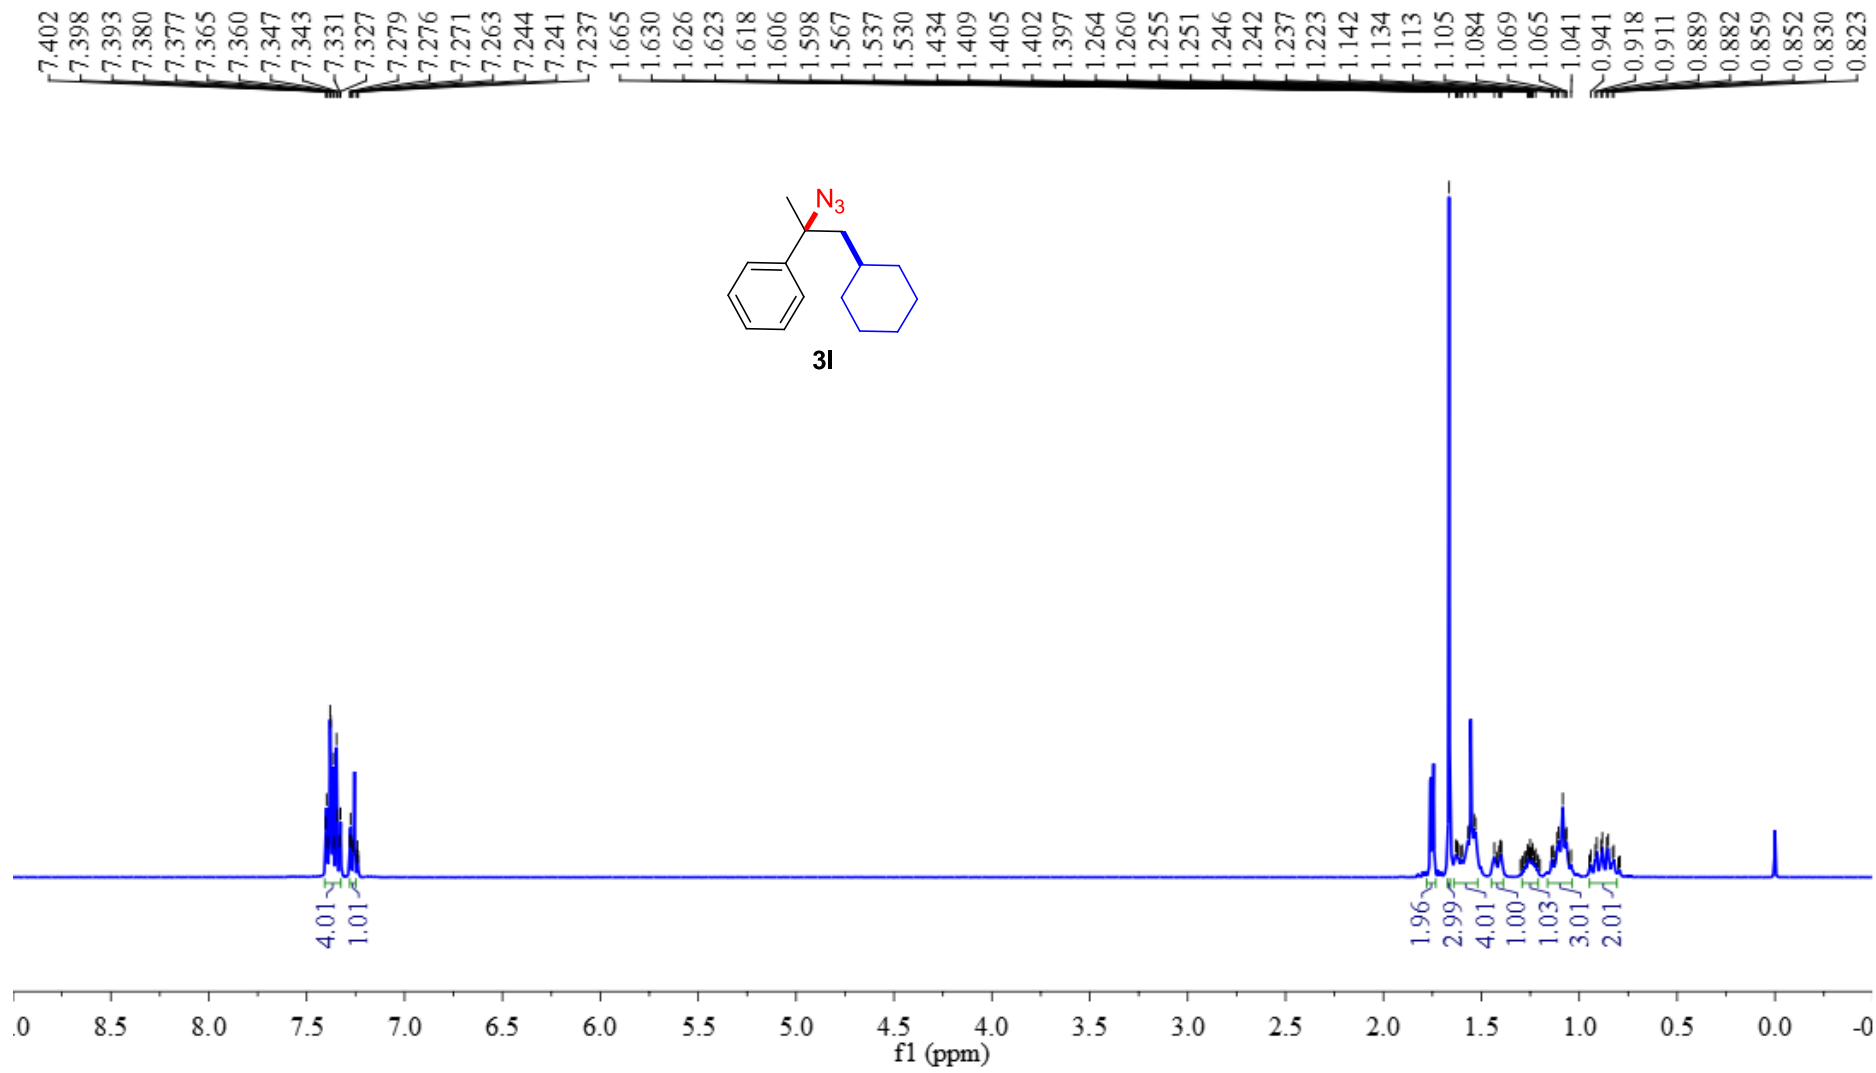

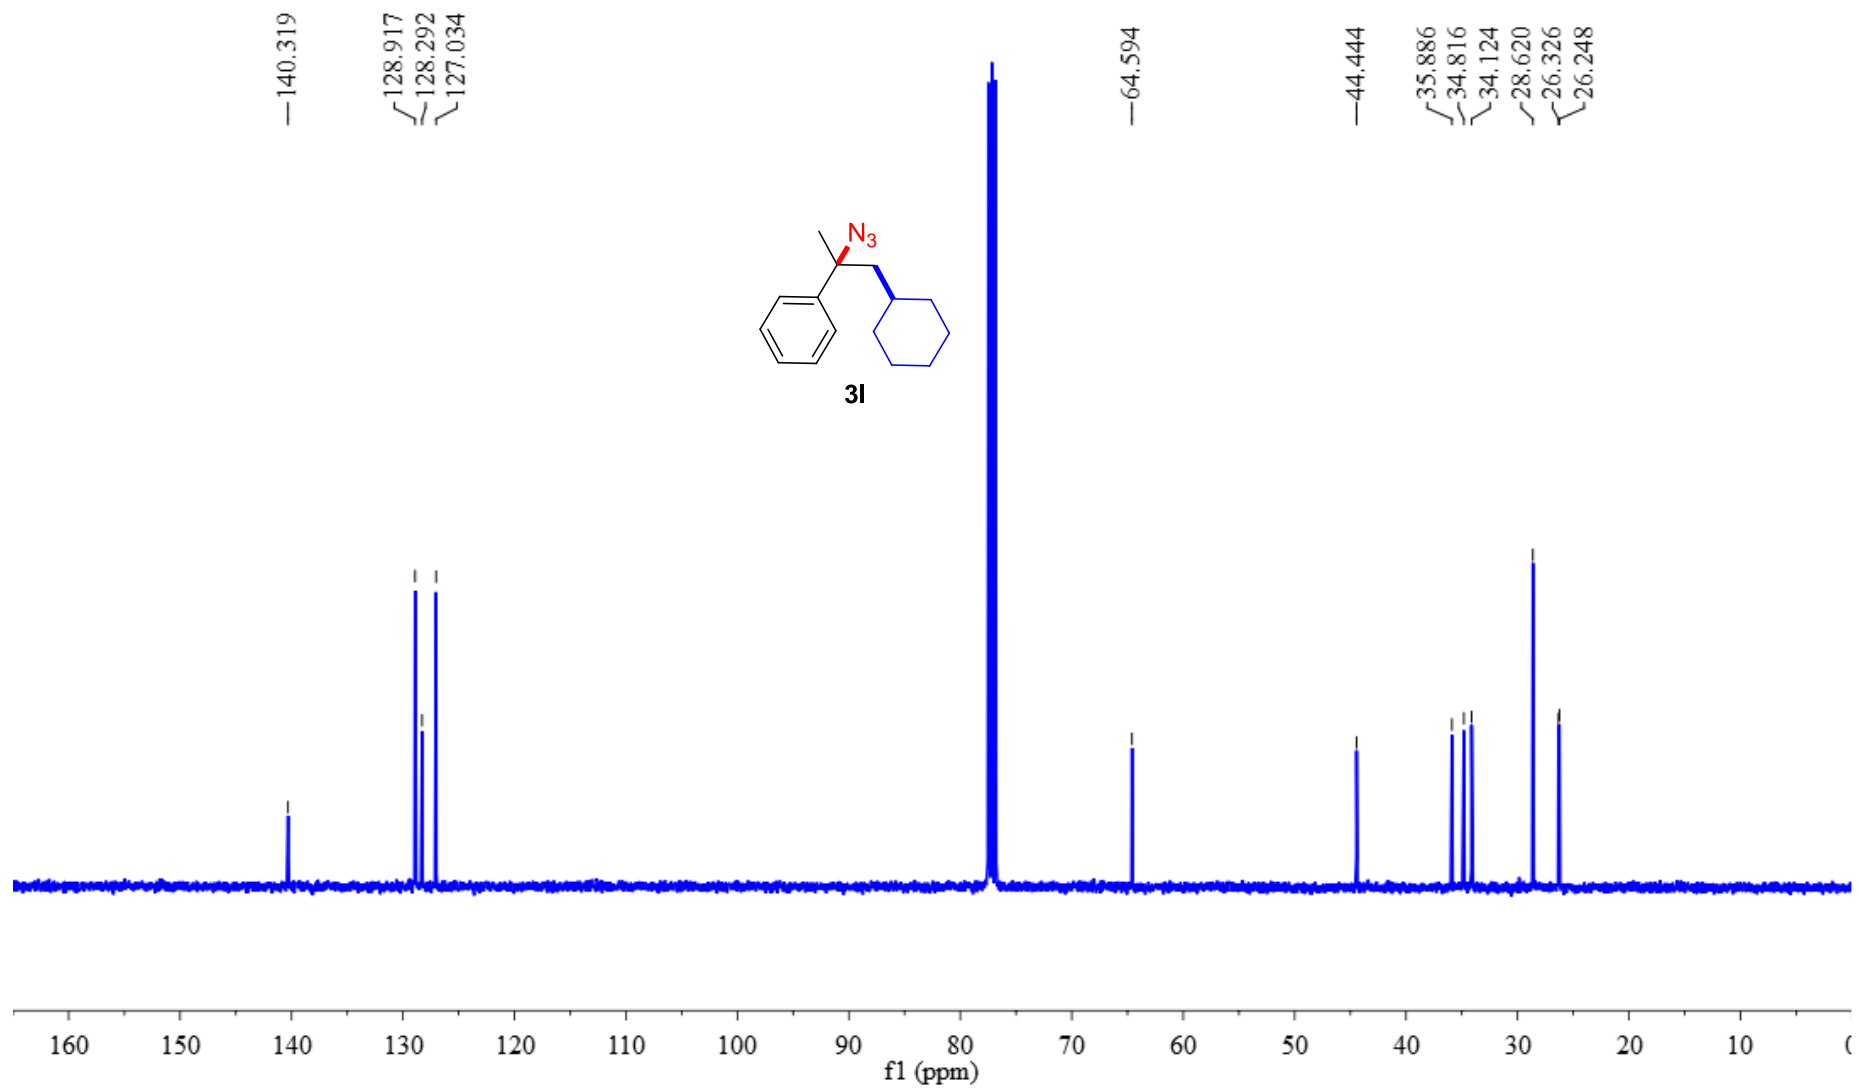

S44

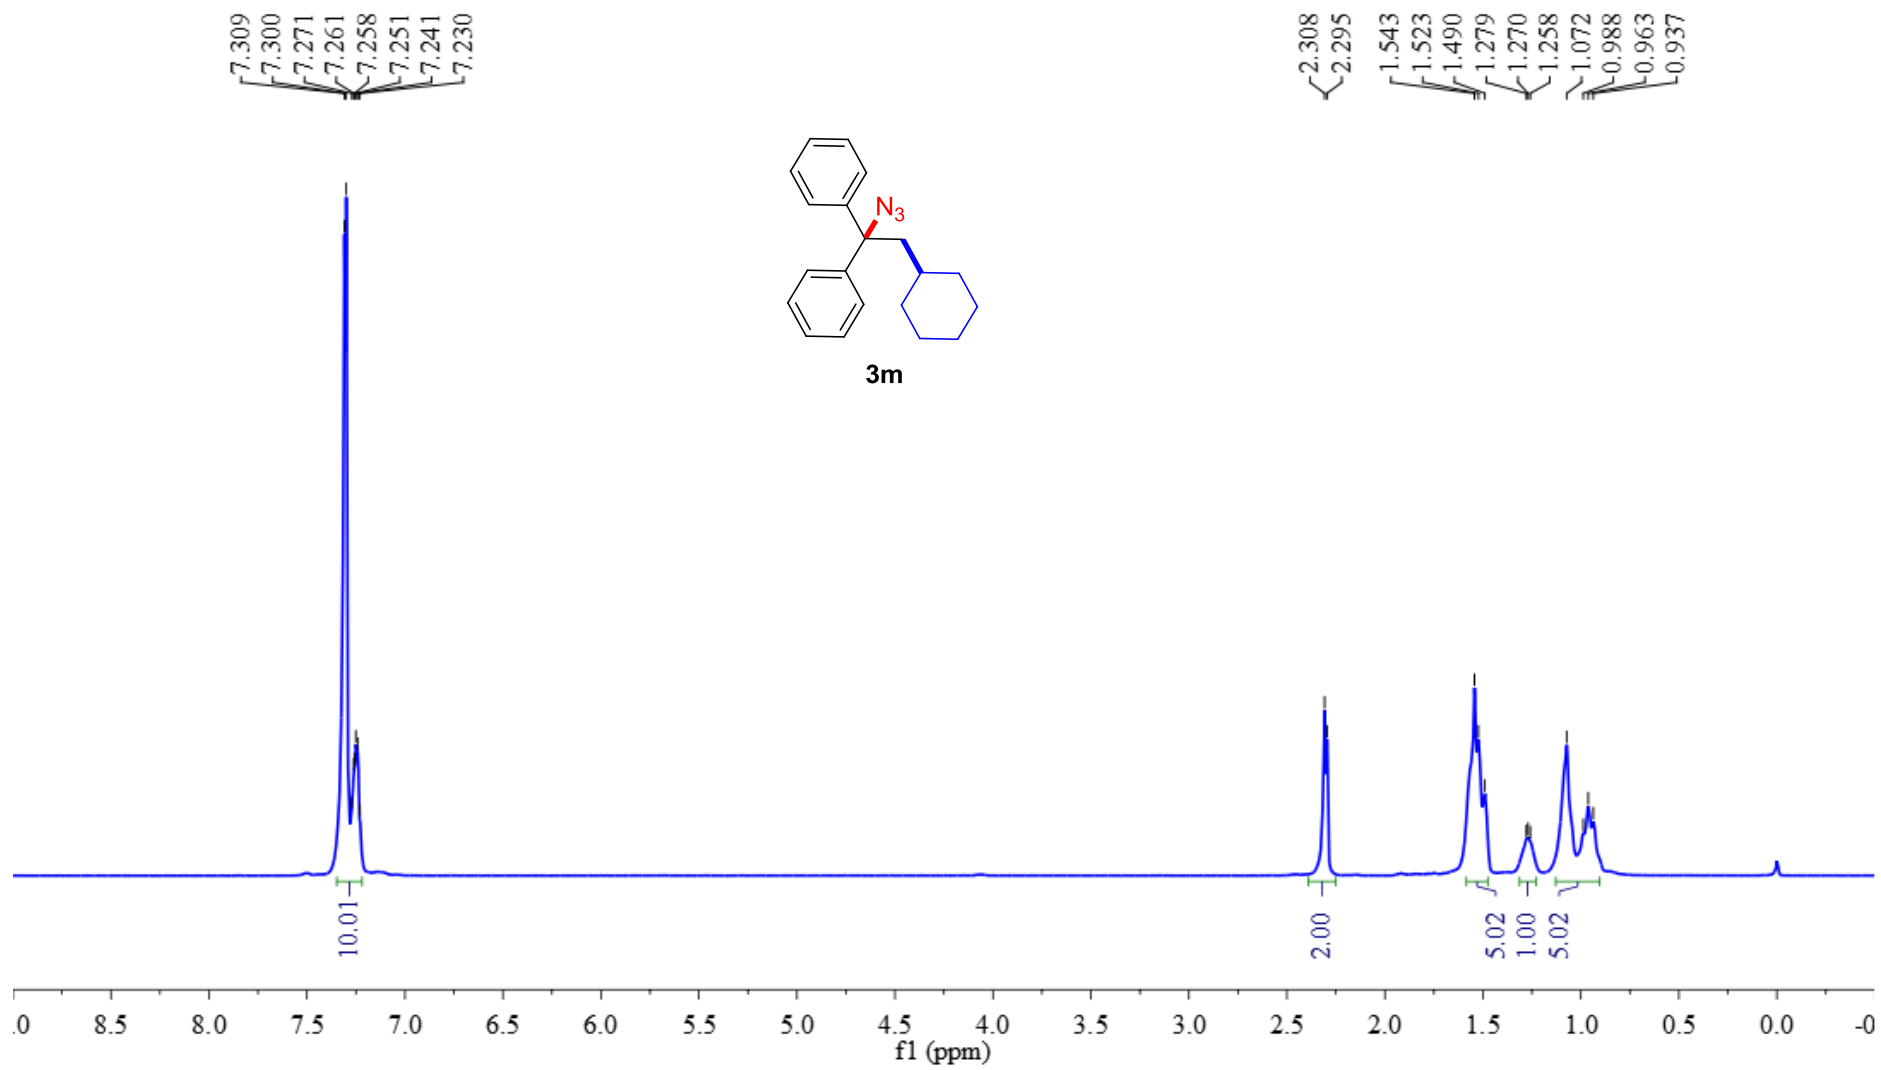

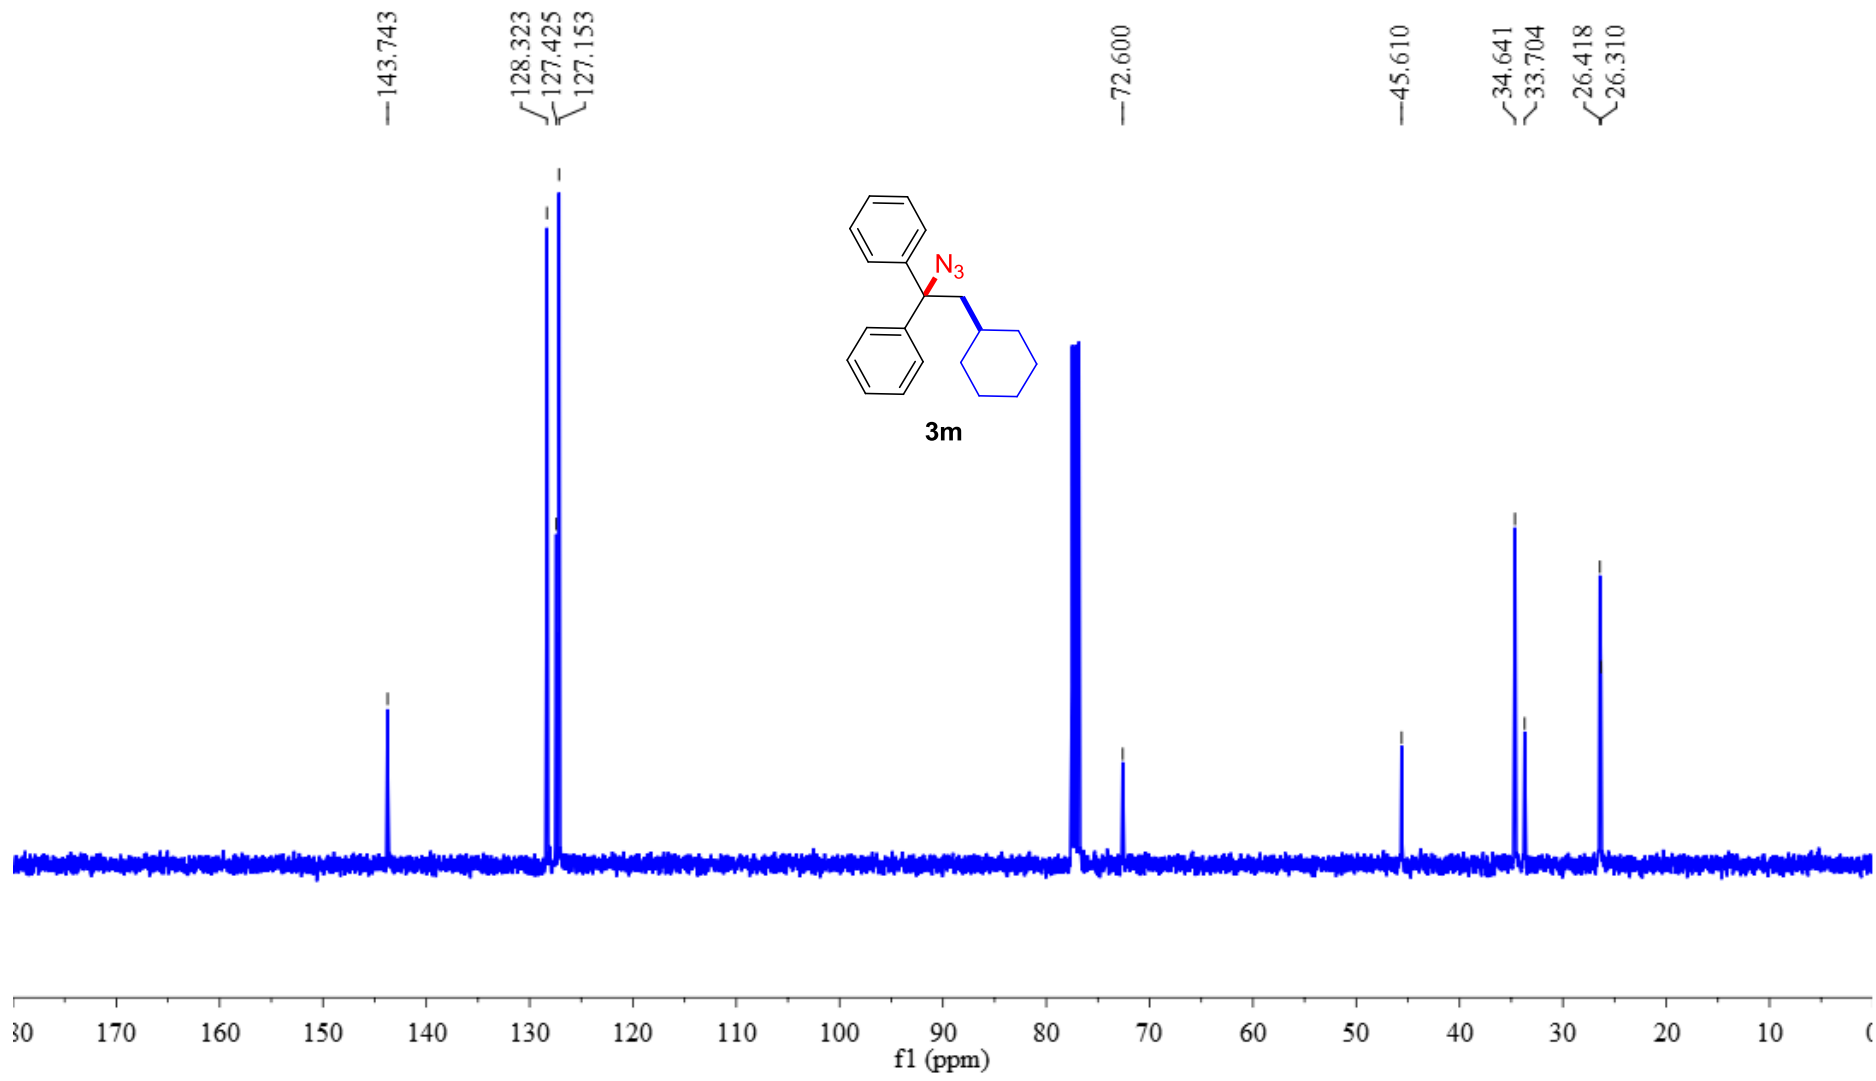

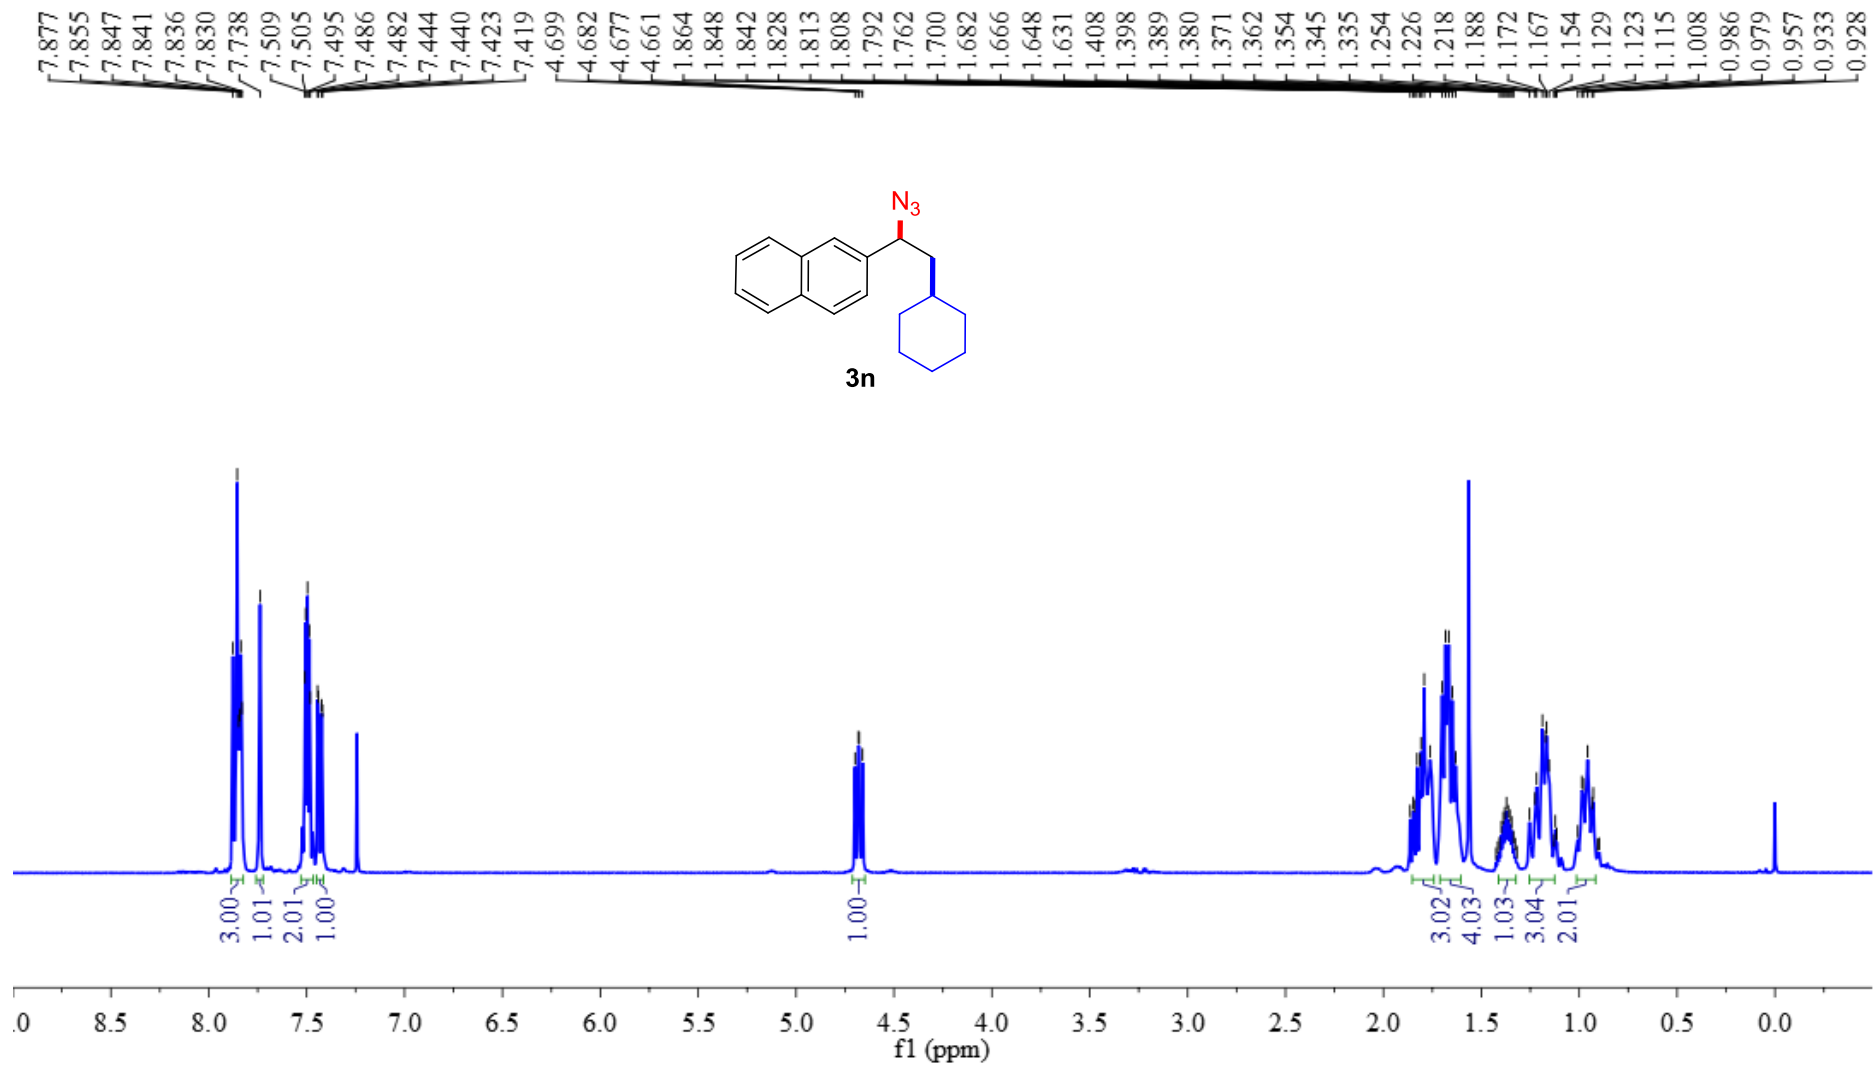



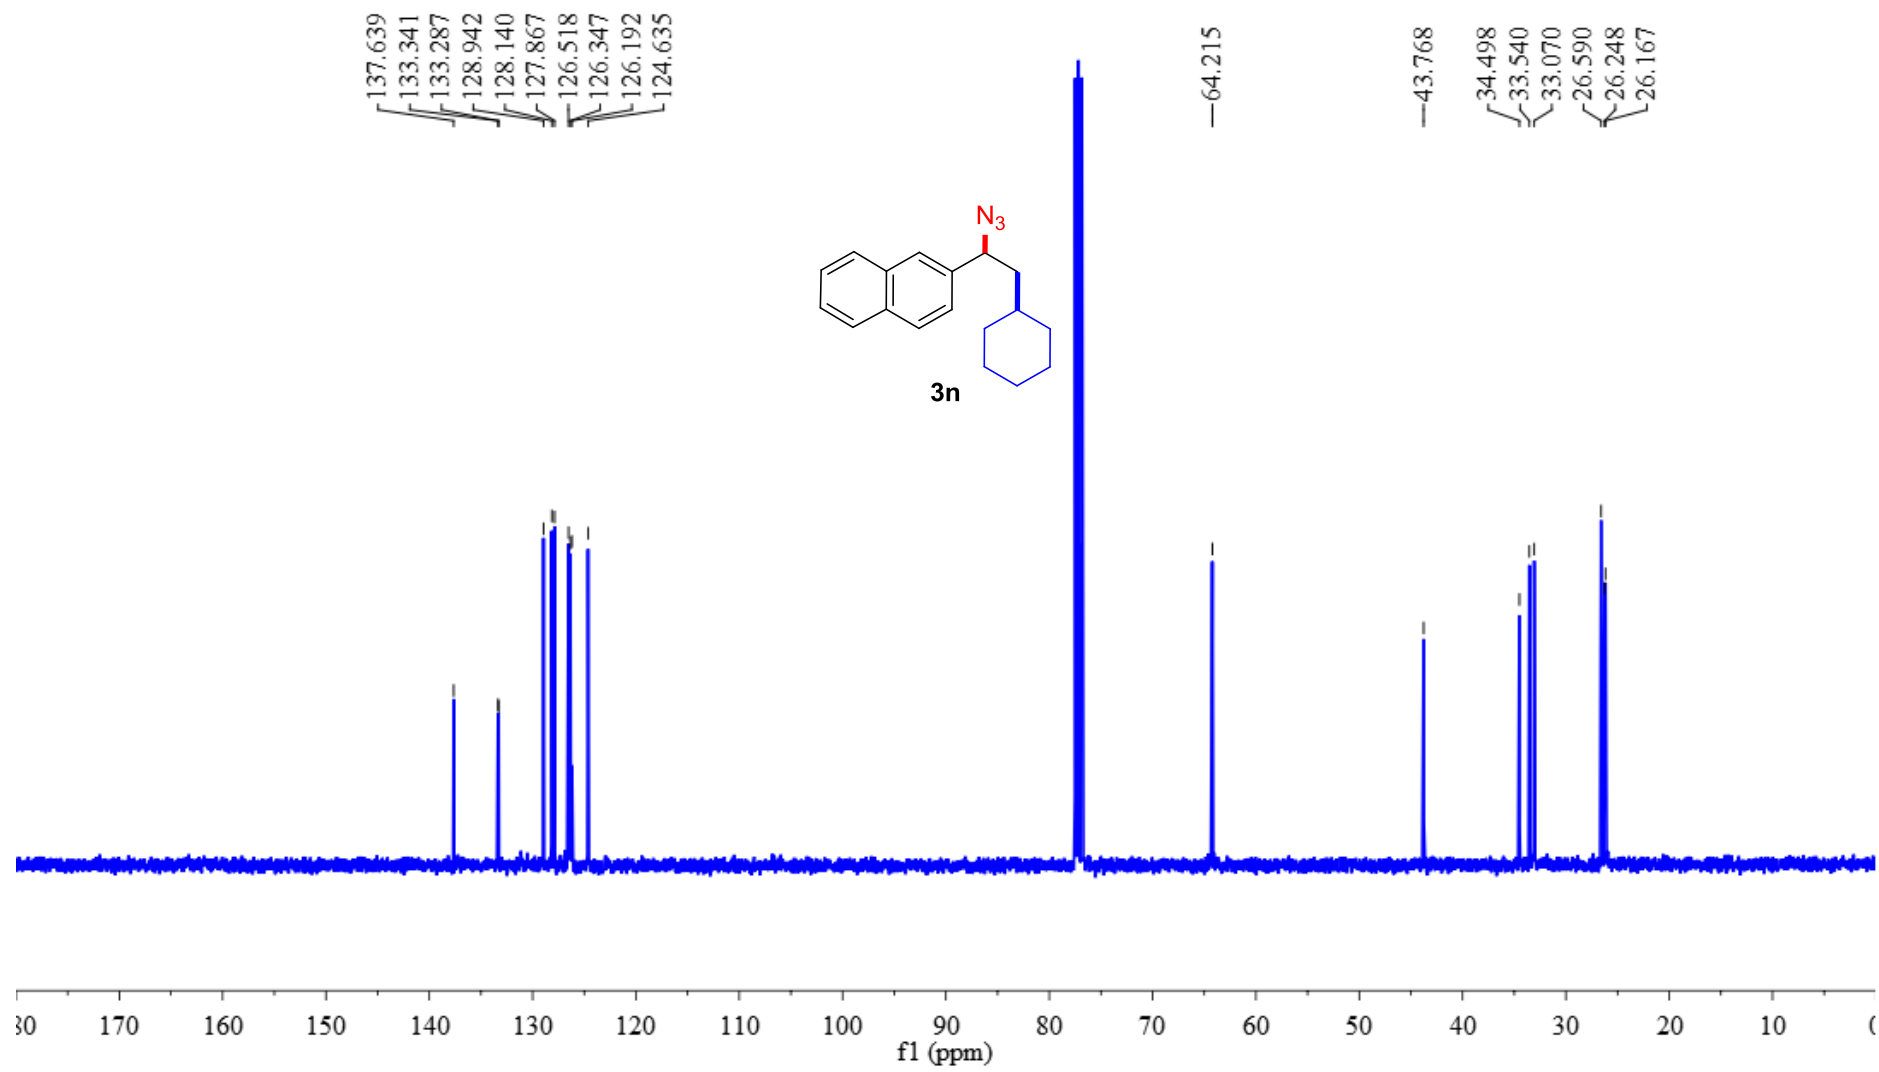

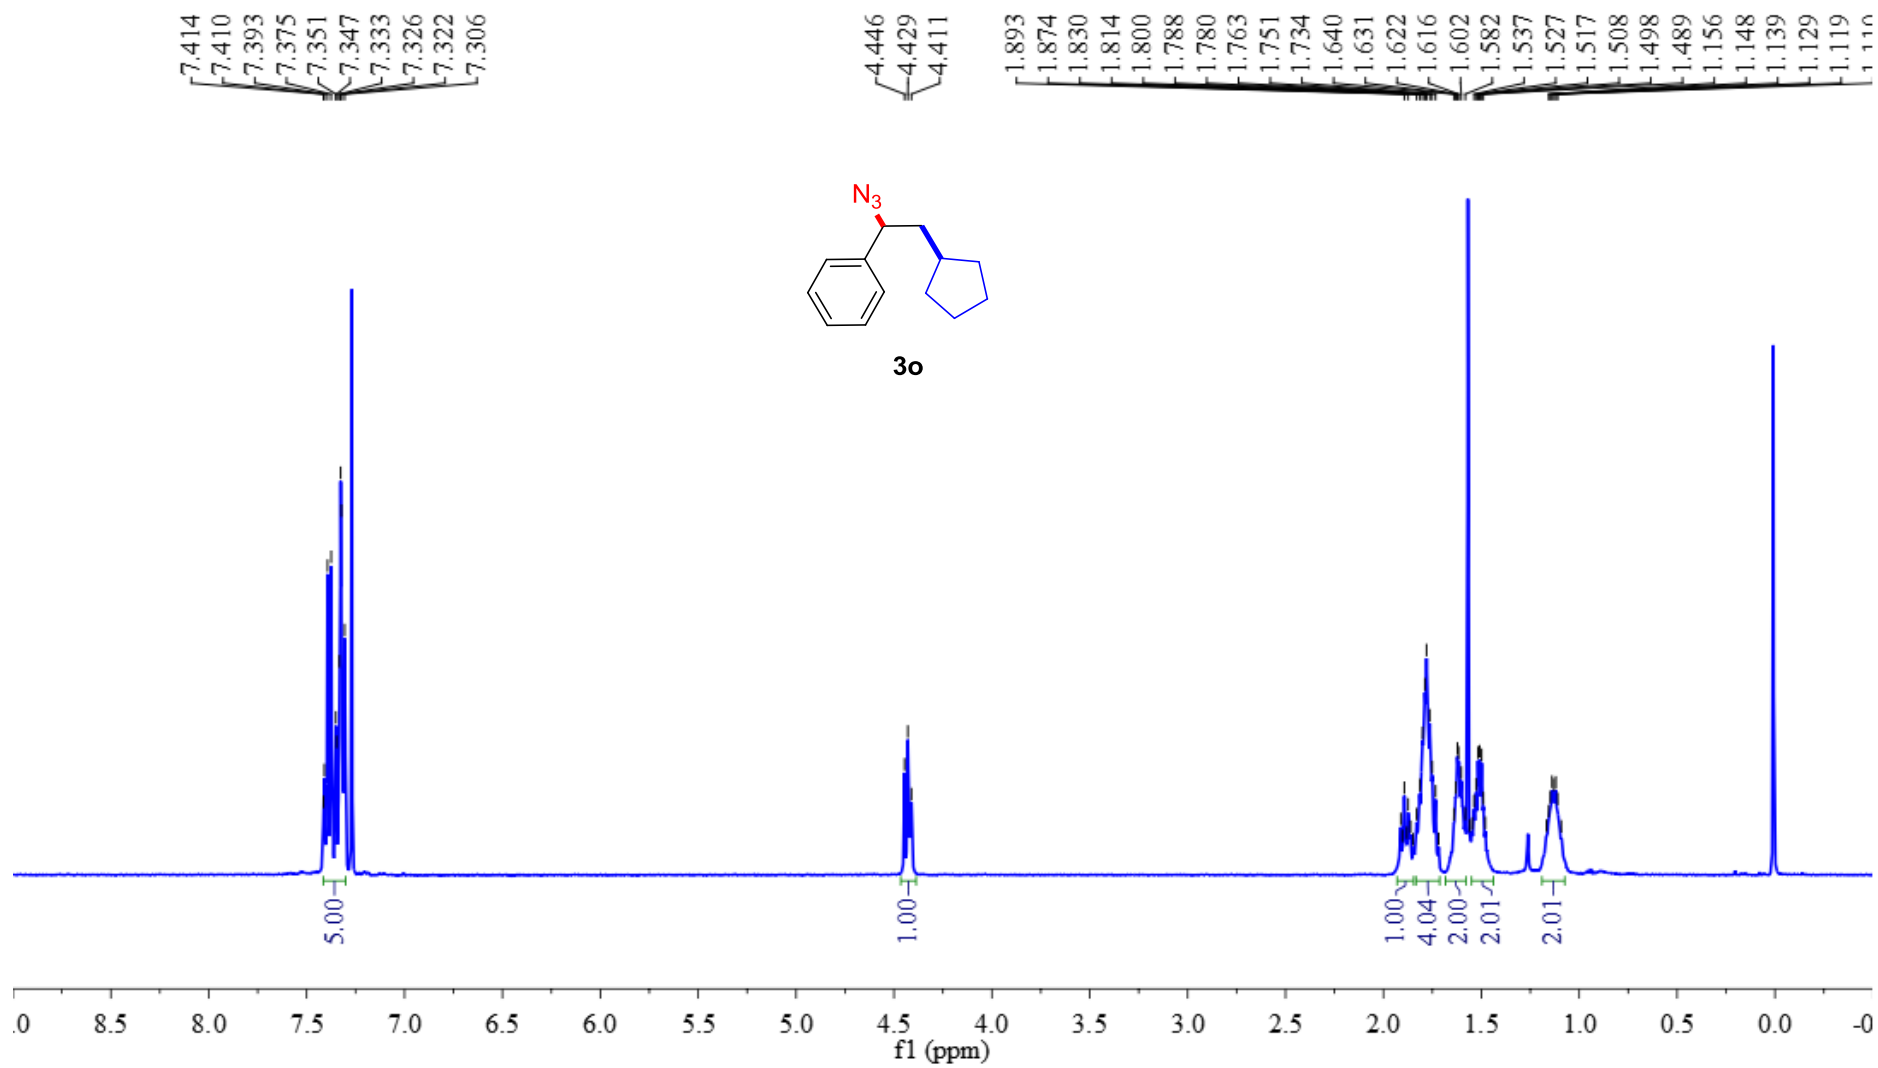

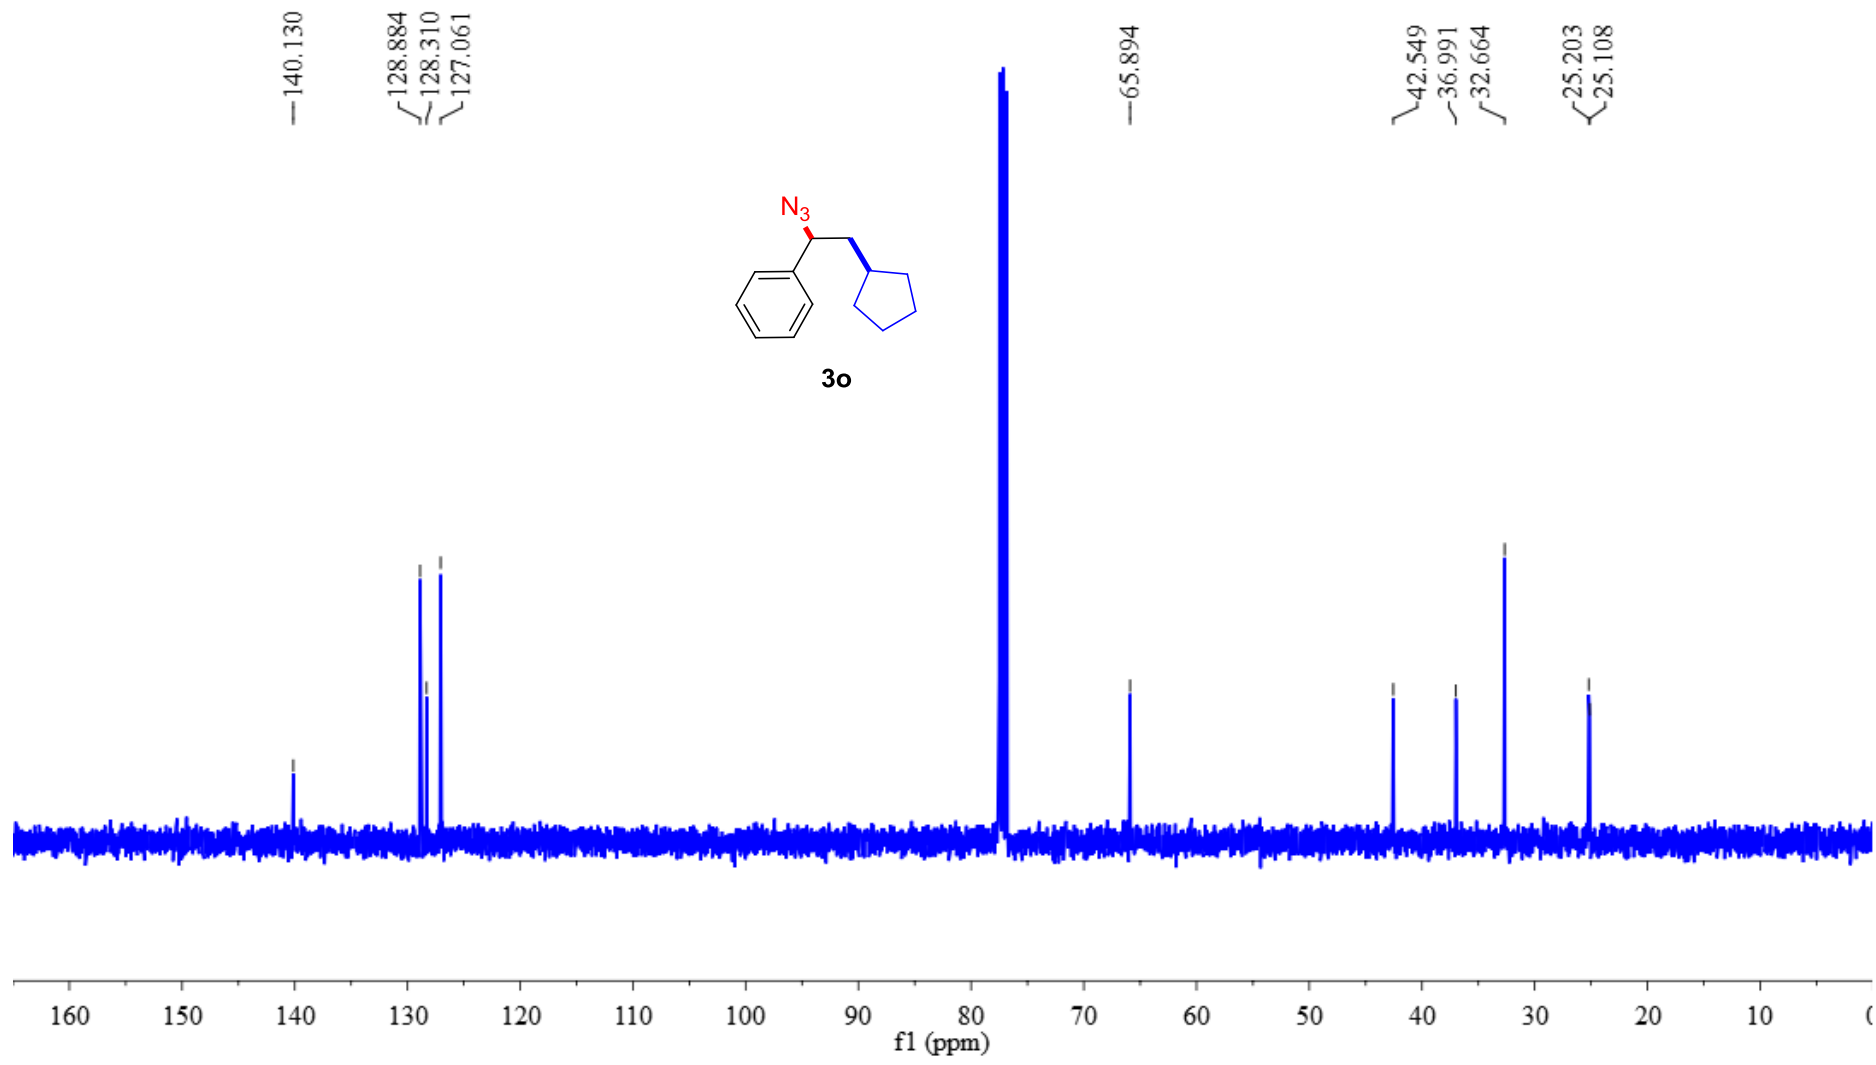

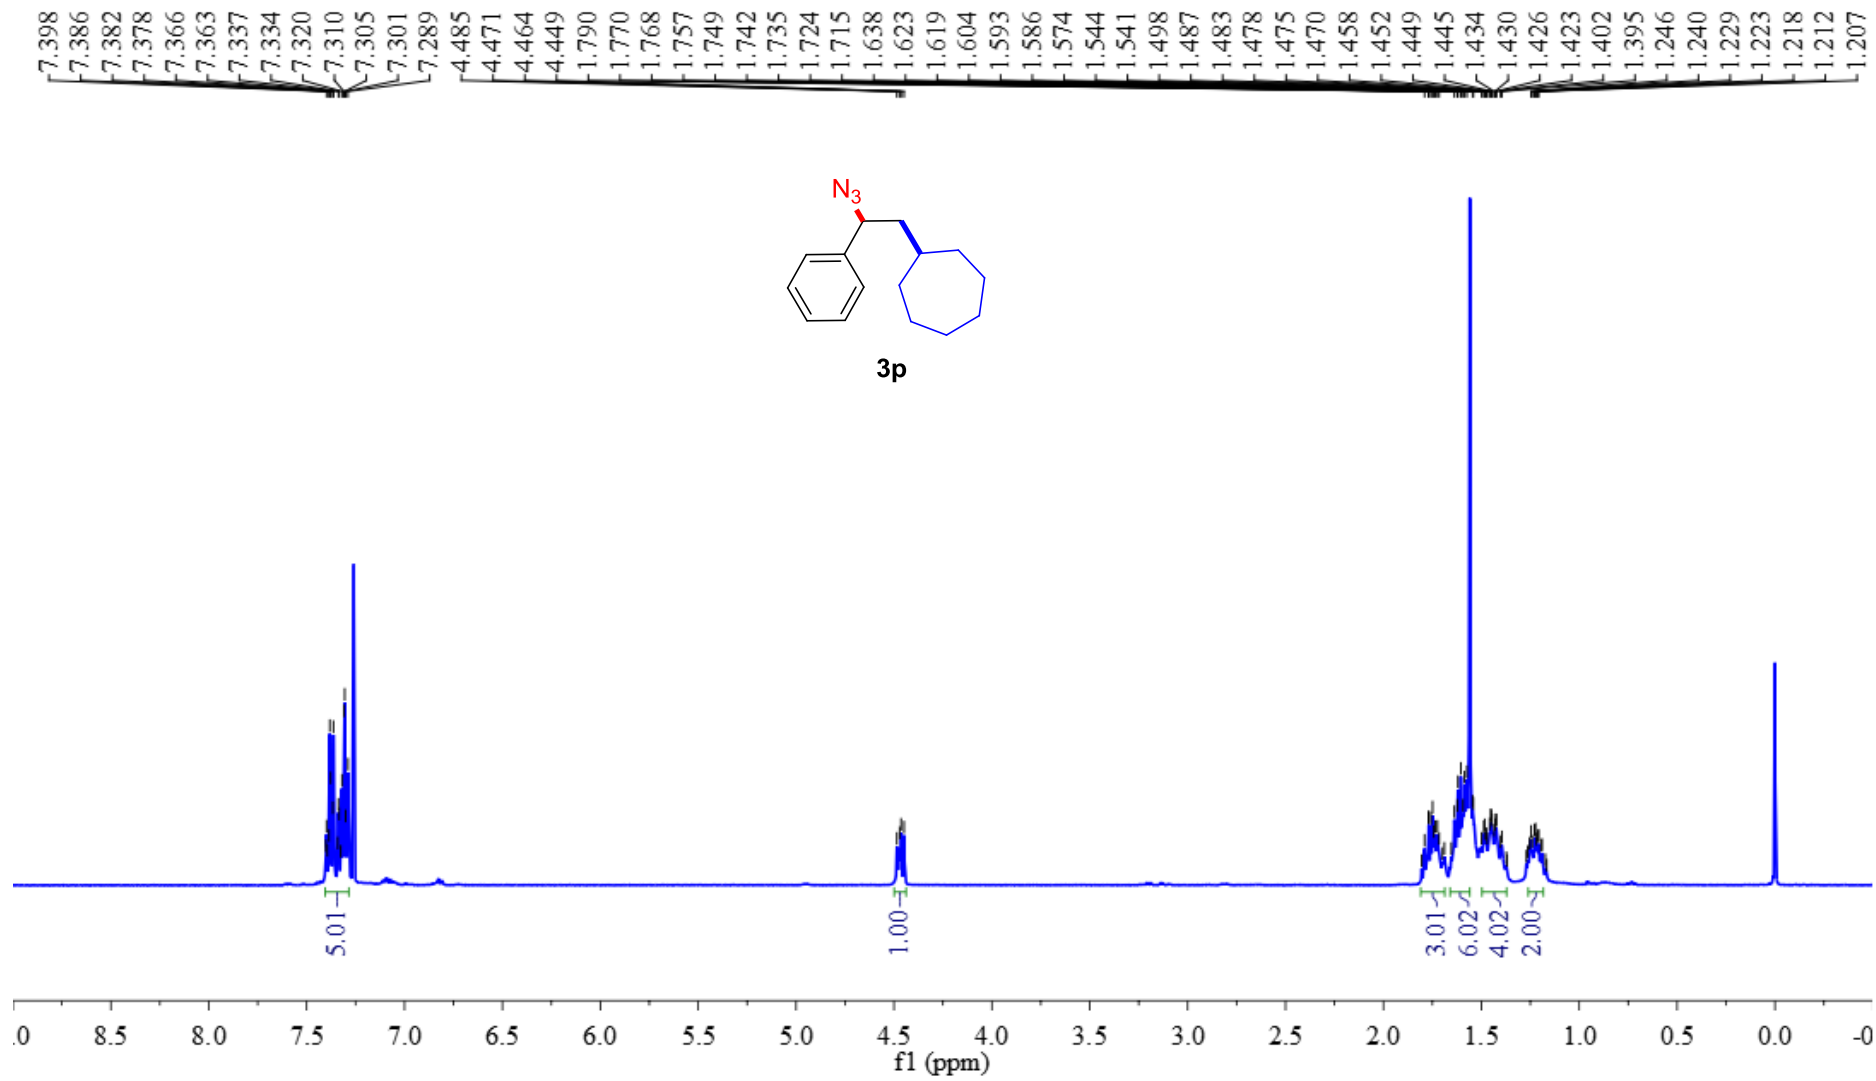

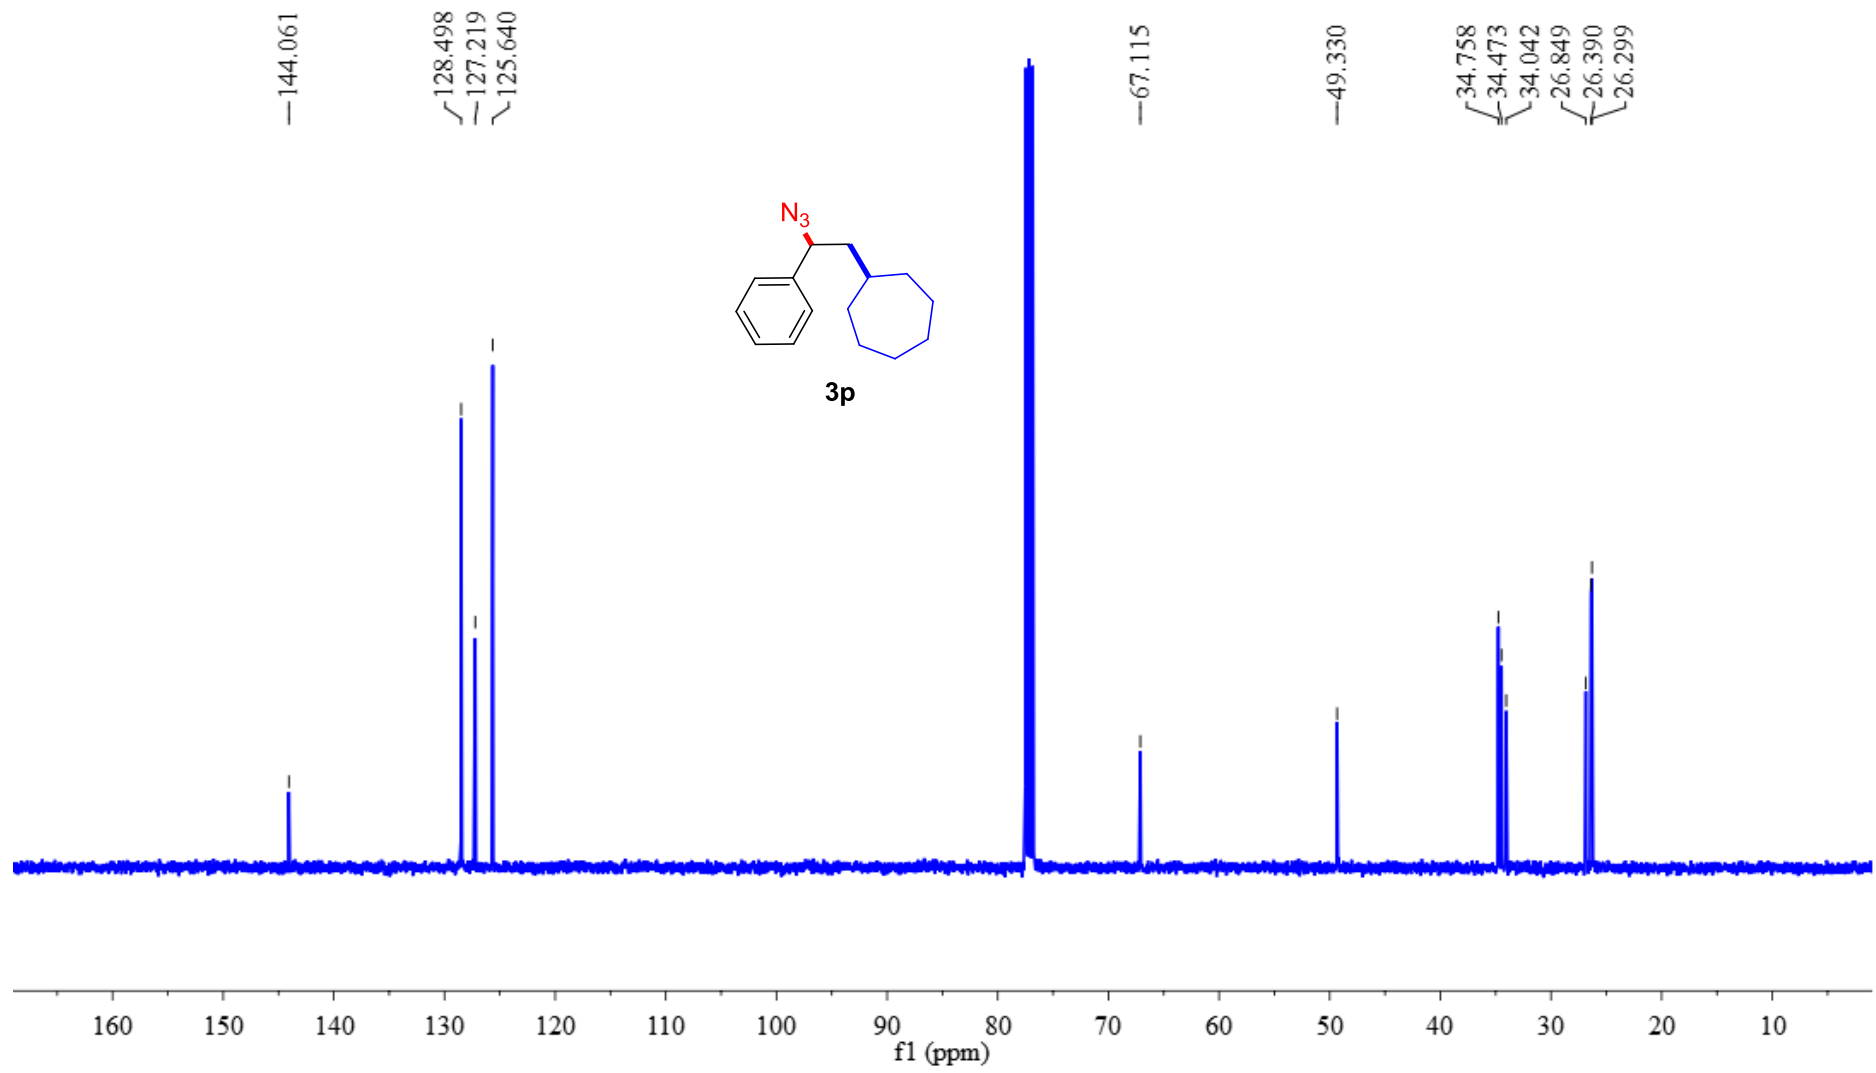

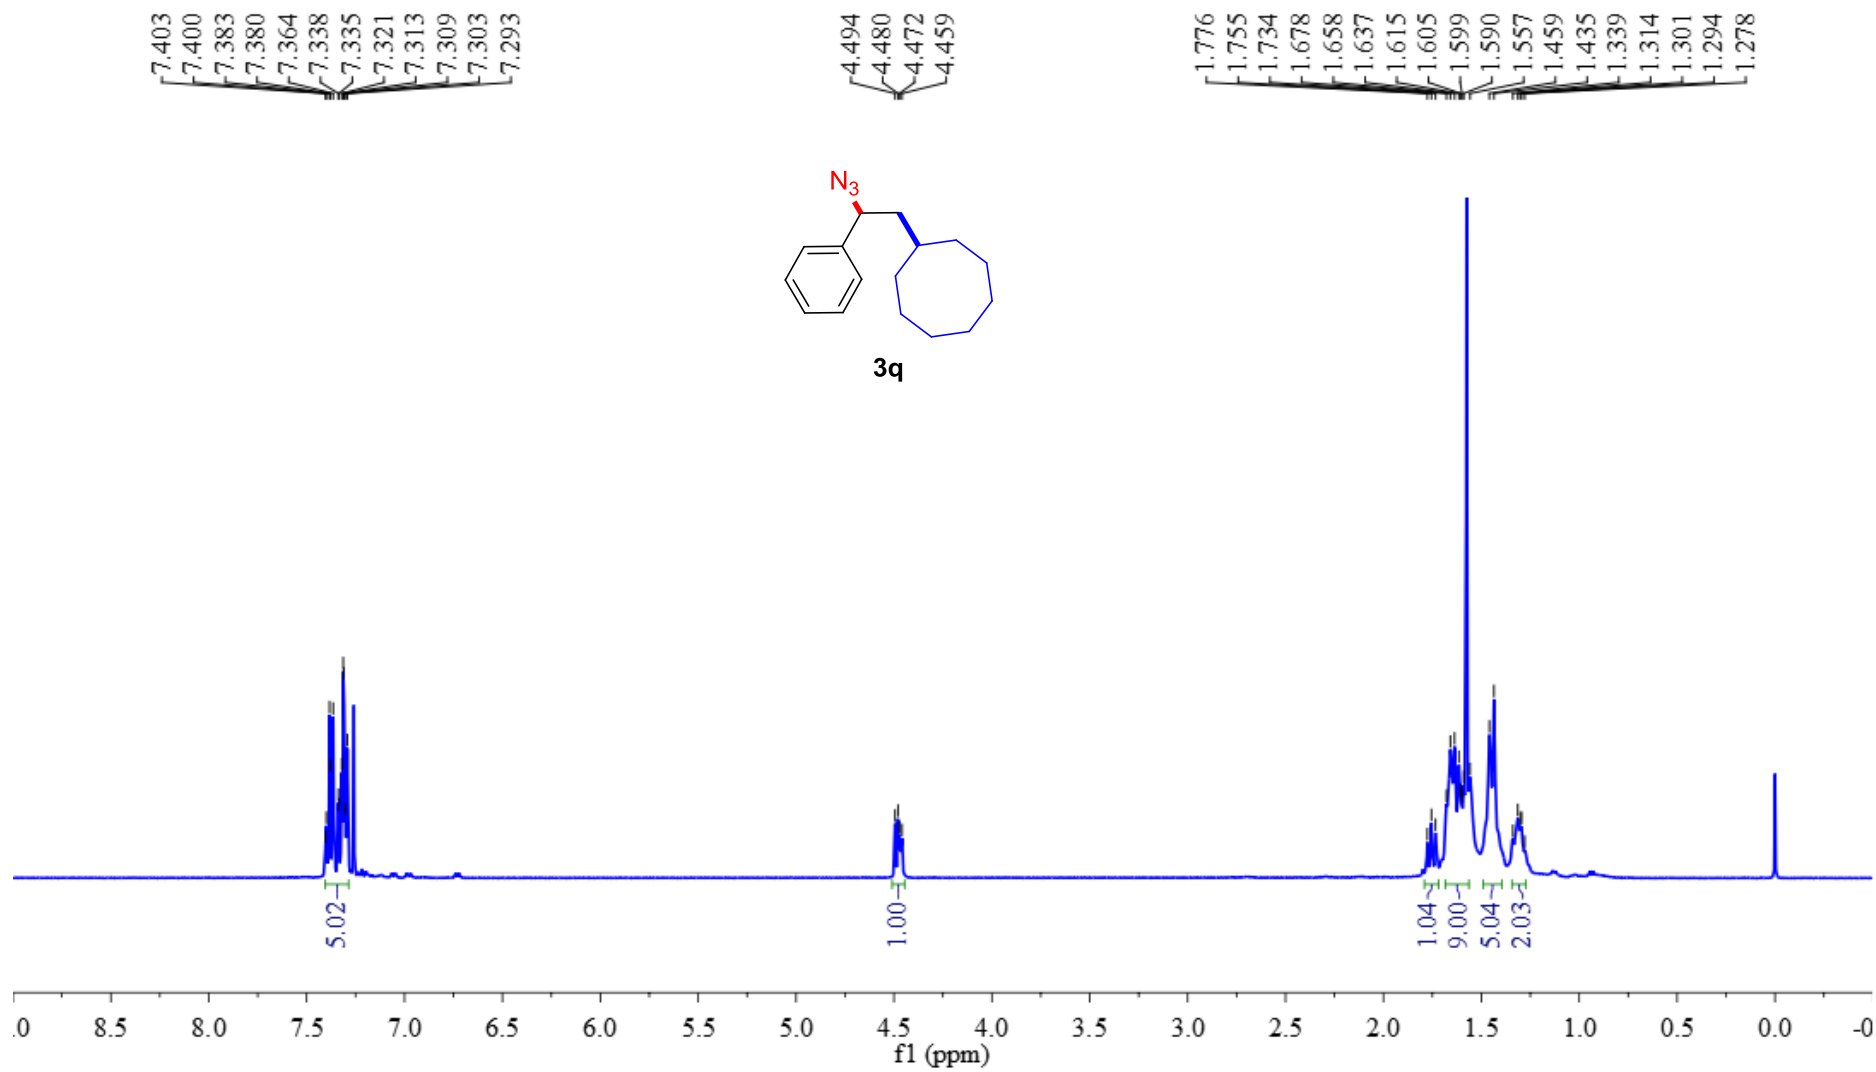

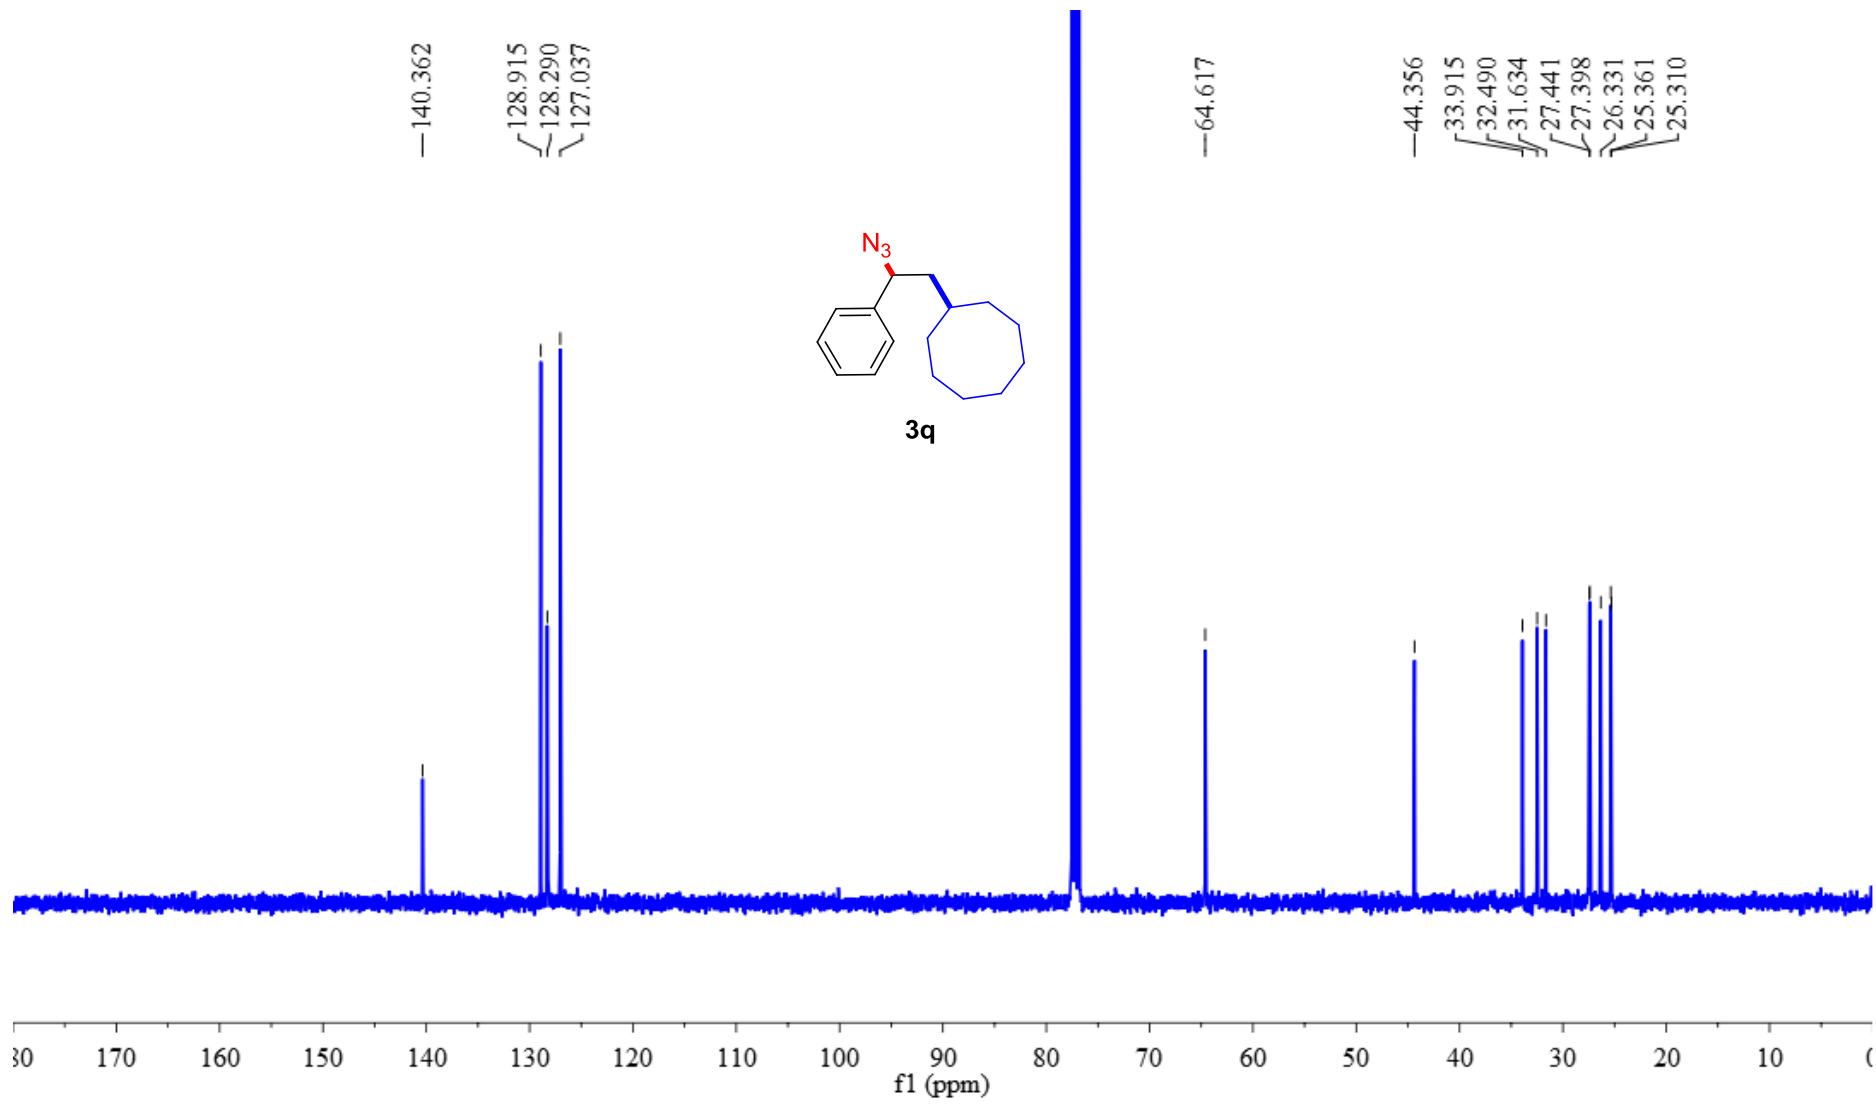

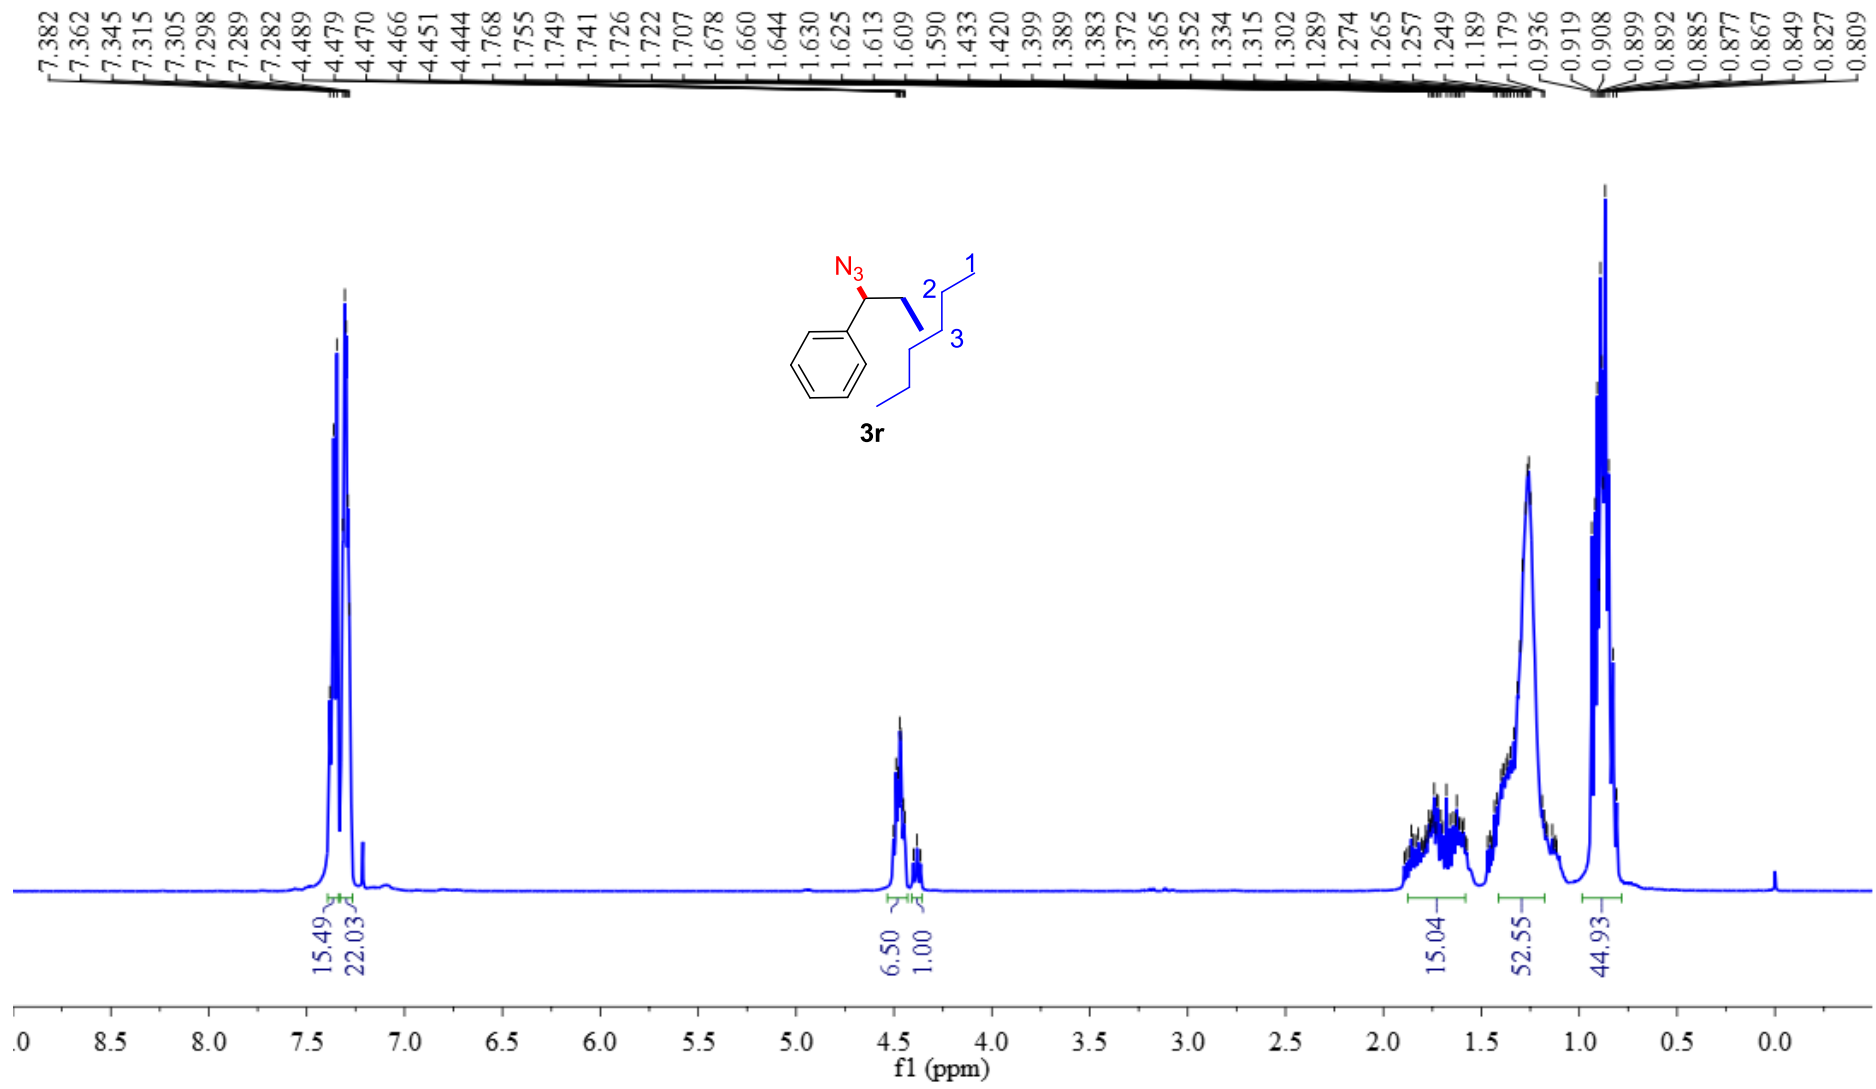



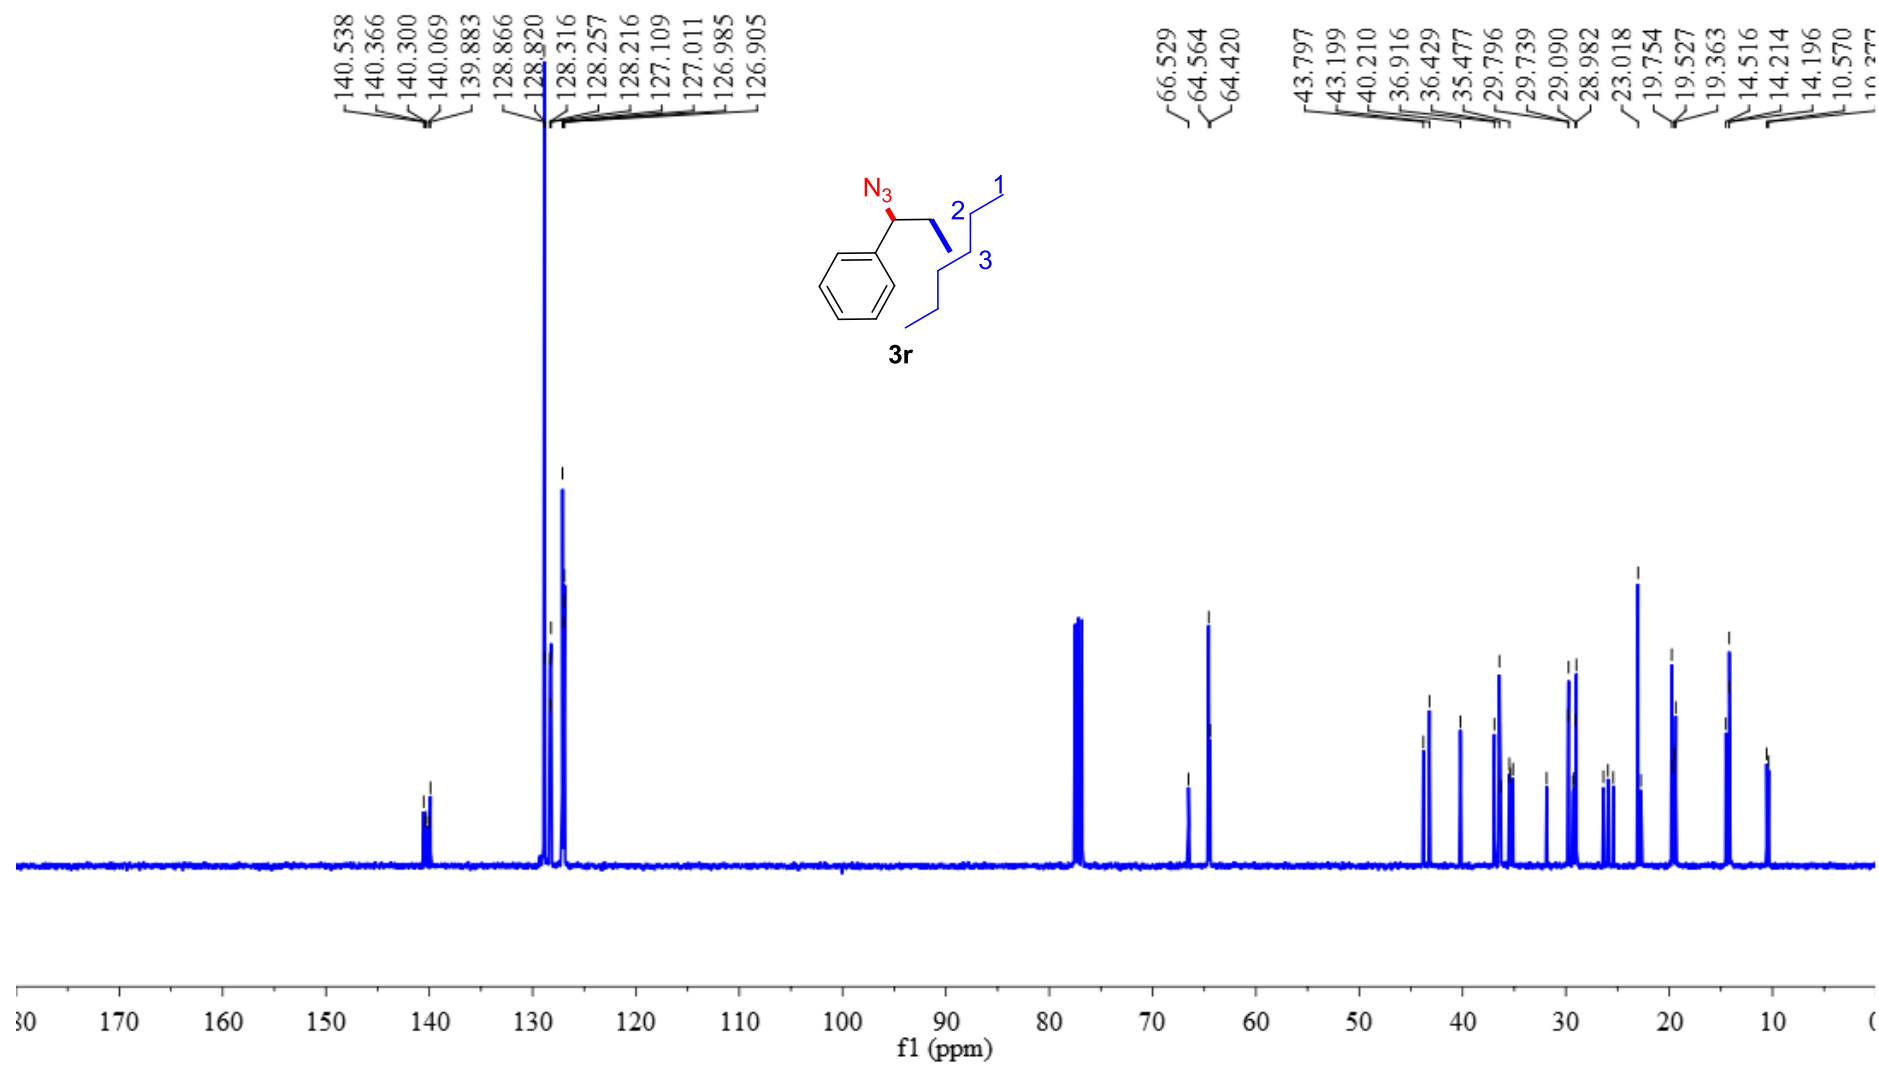

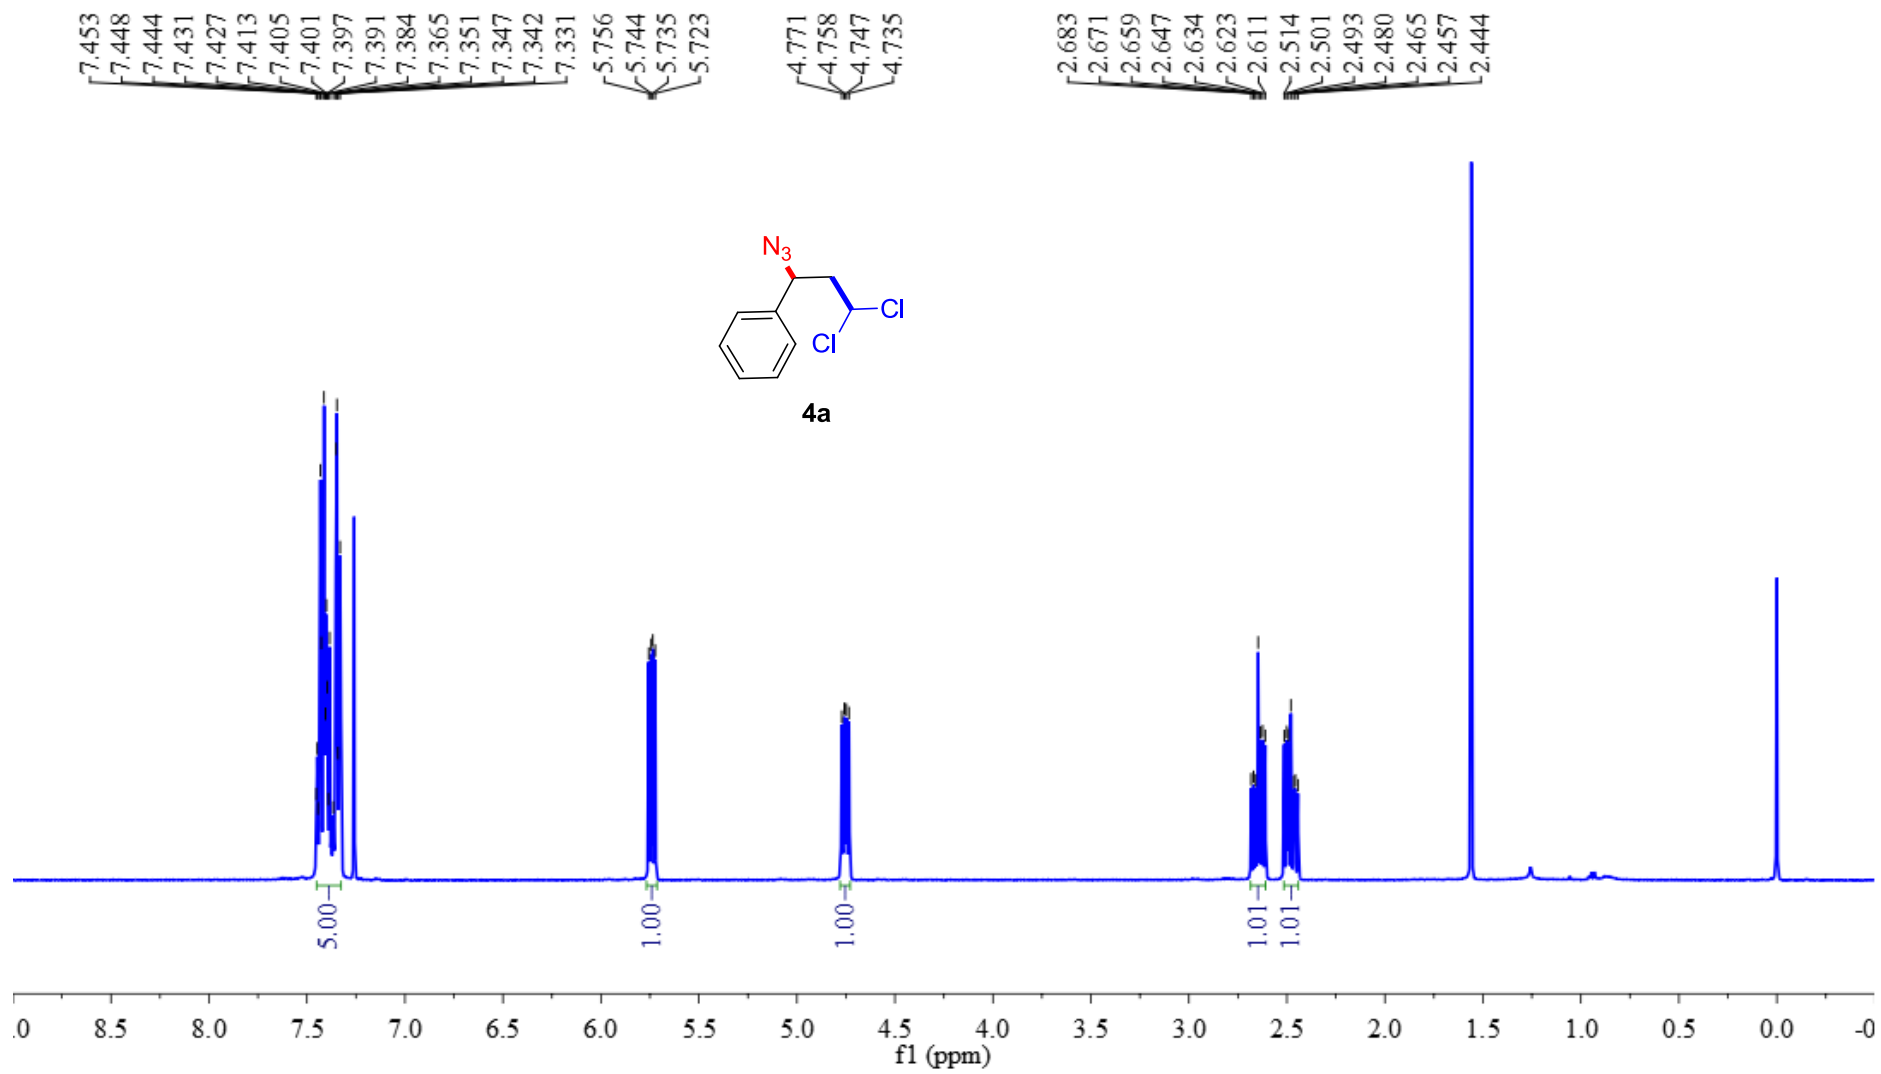

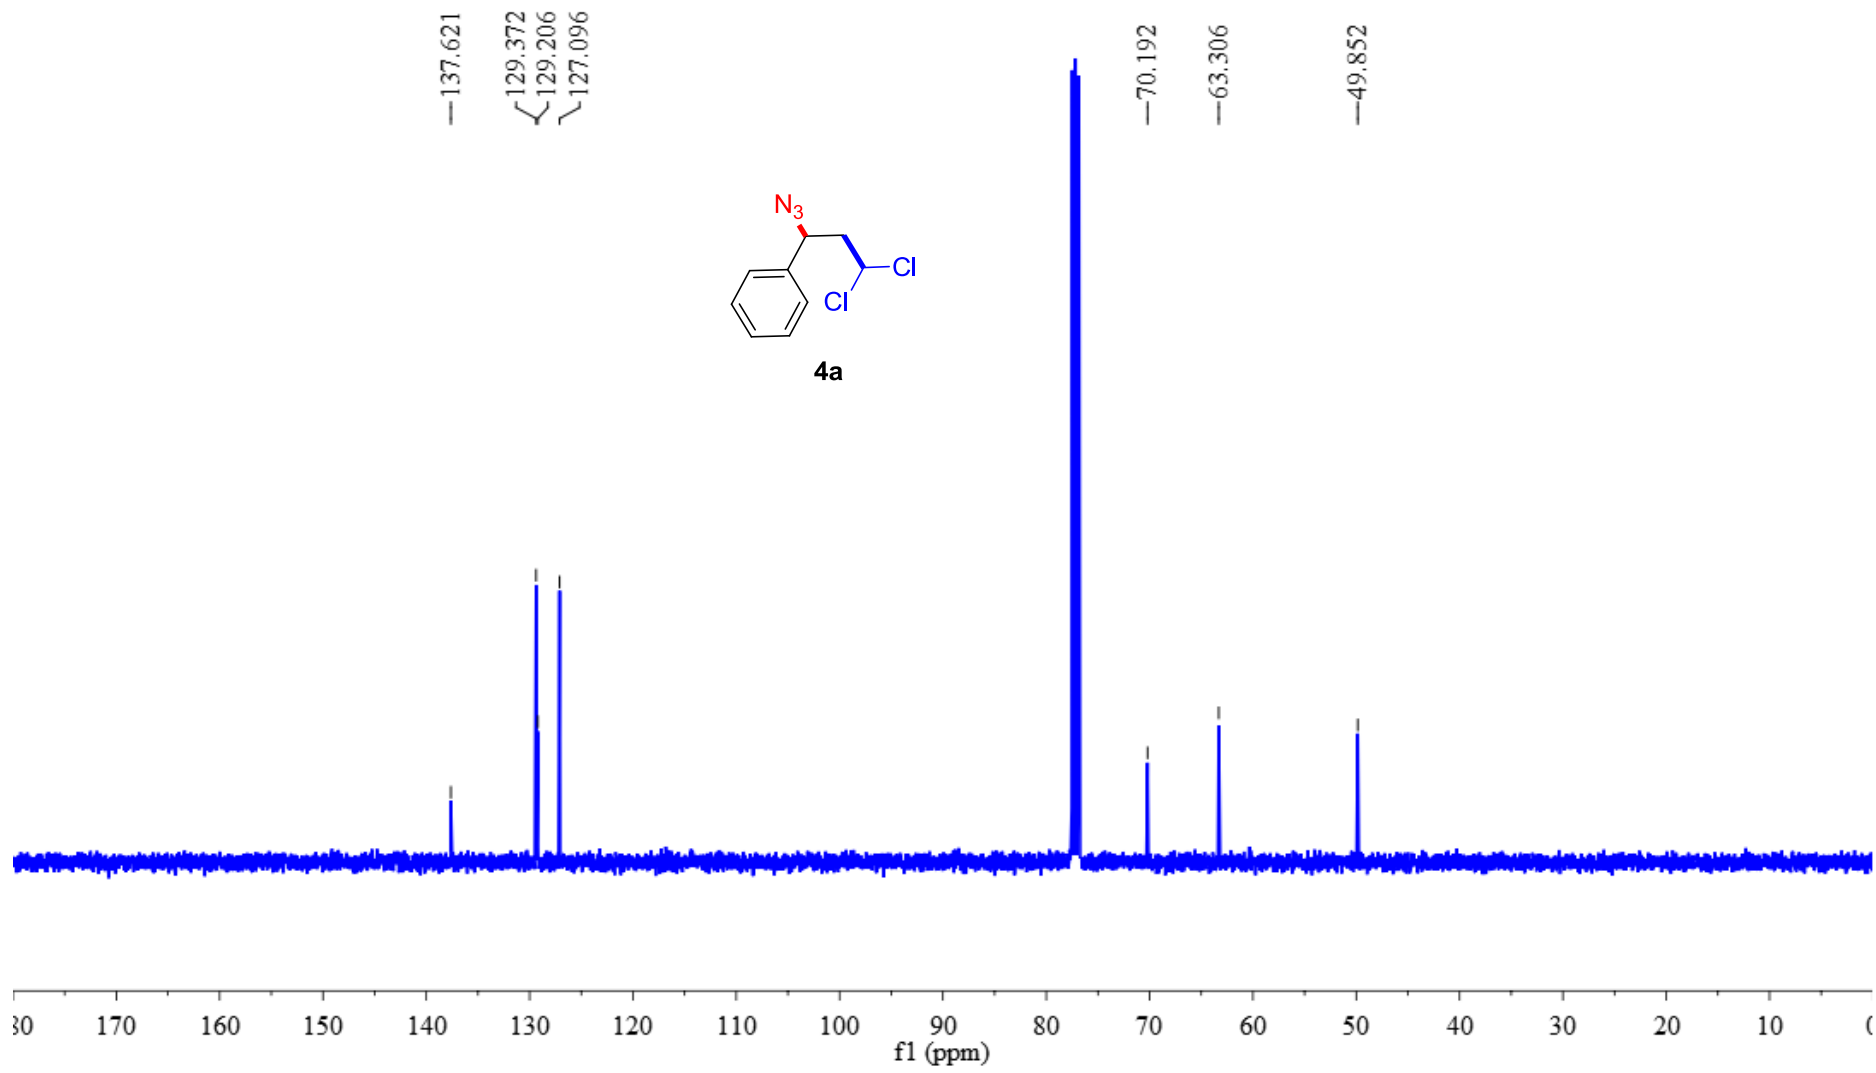

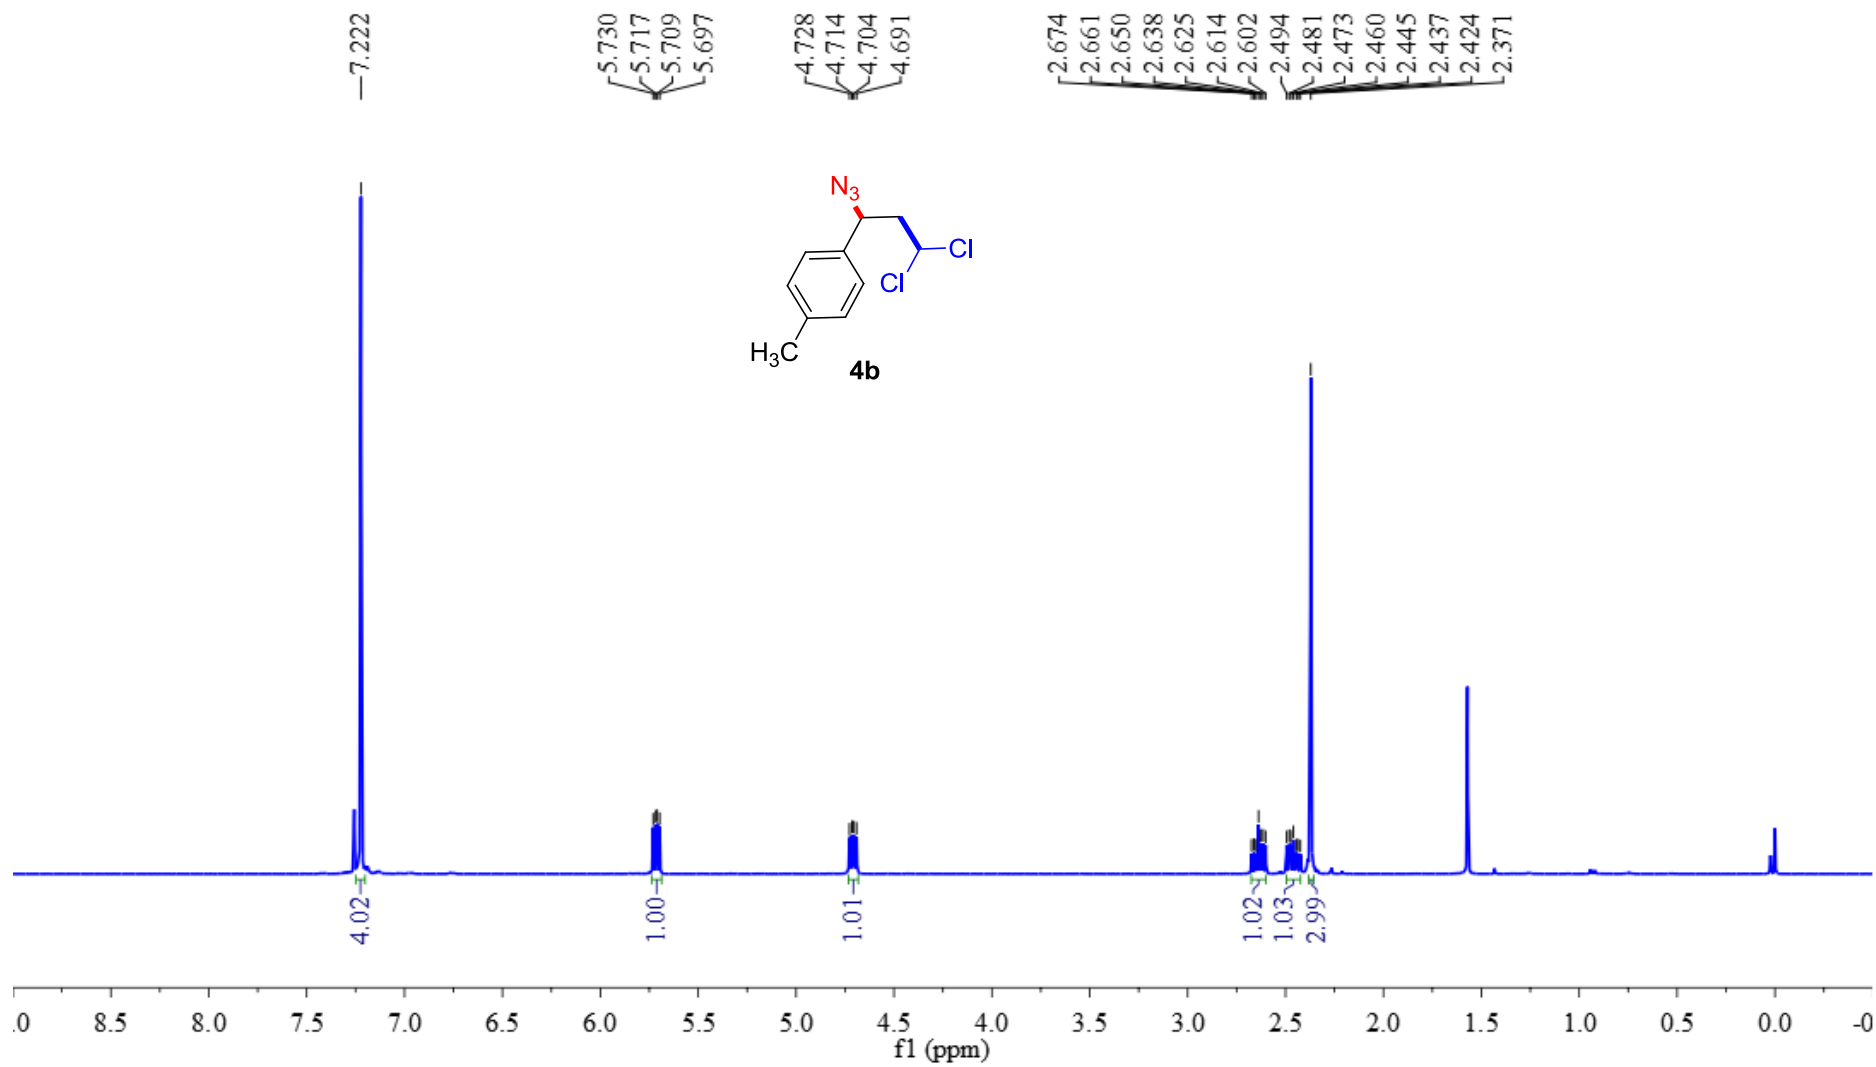

139.135  
134.494  
130.010  
127.048

70.264

63.087

49.789

21.322

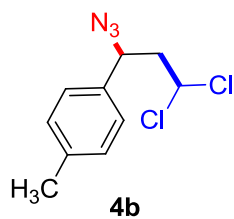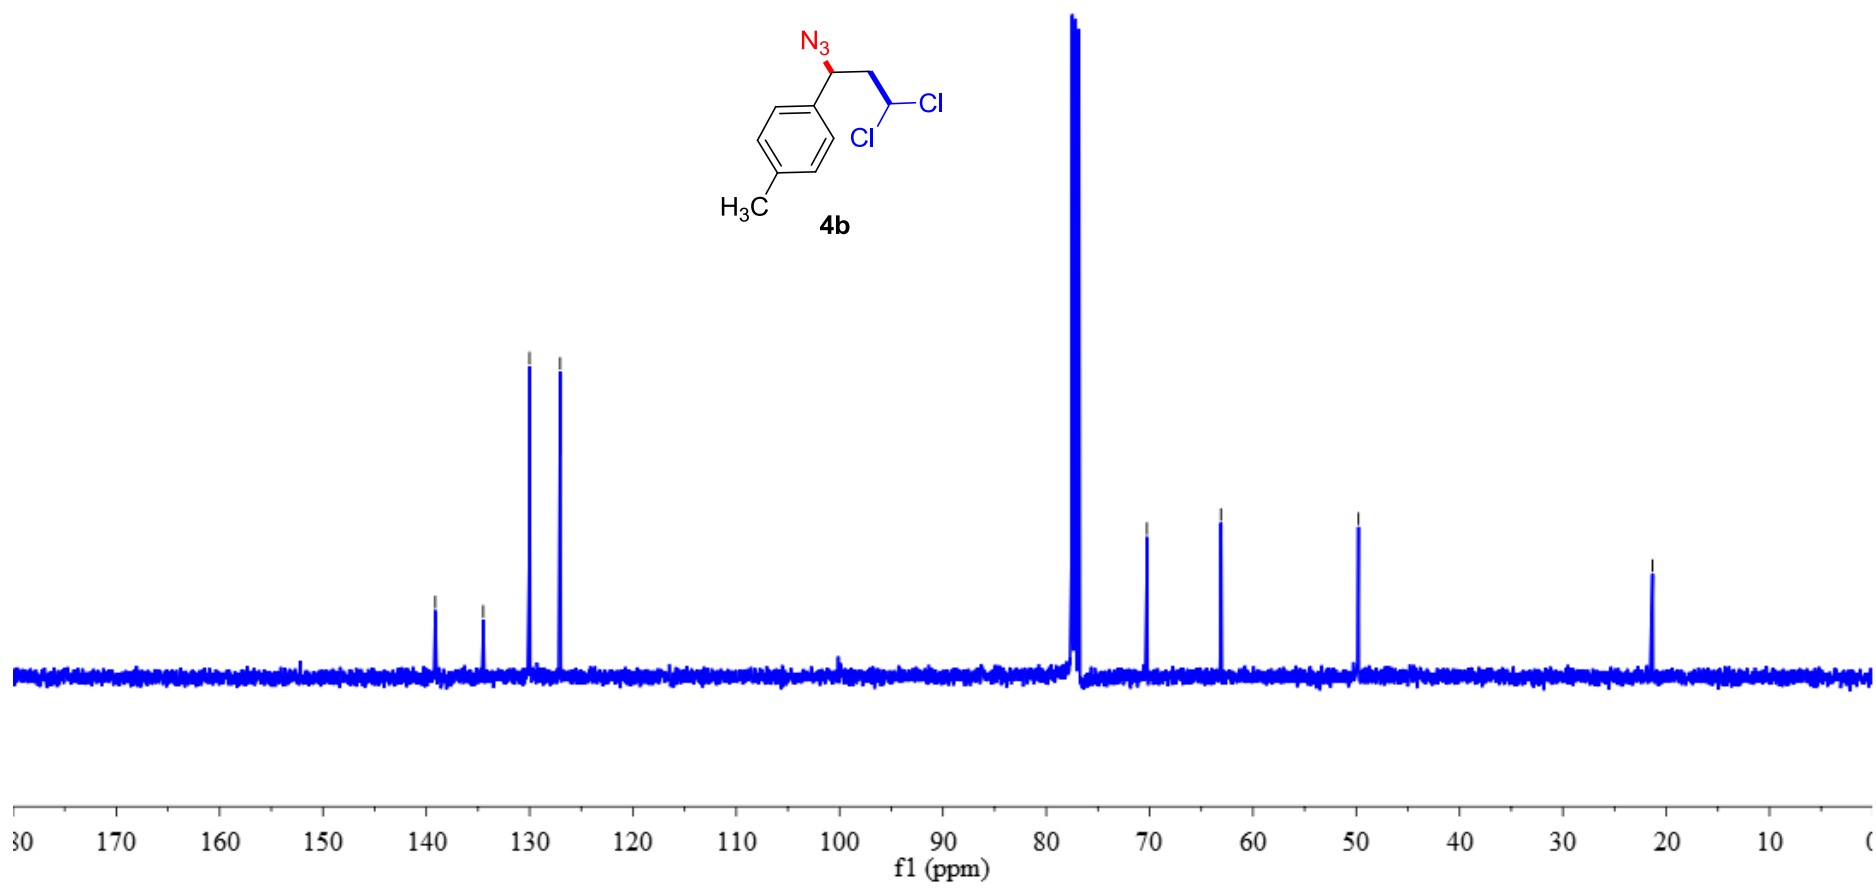

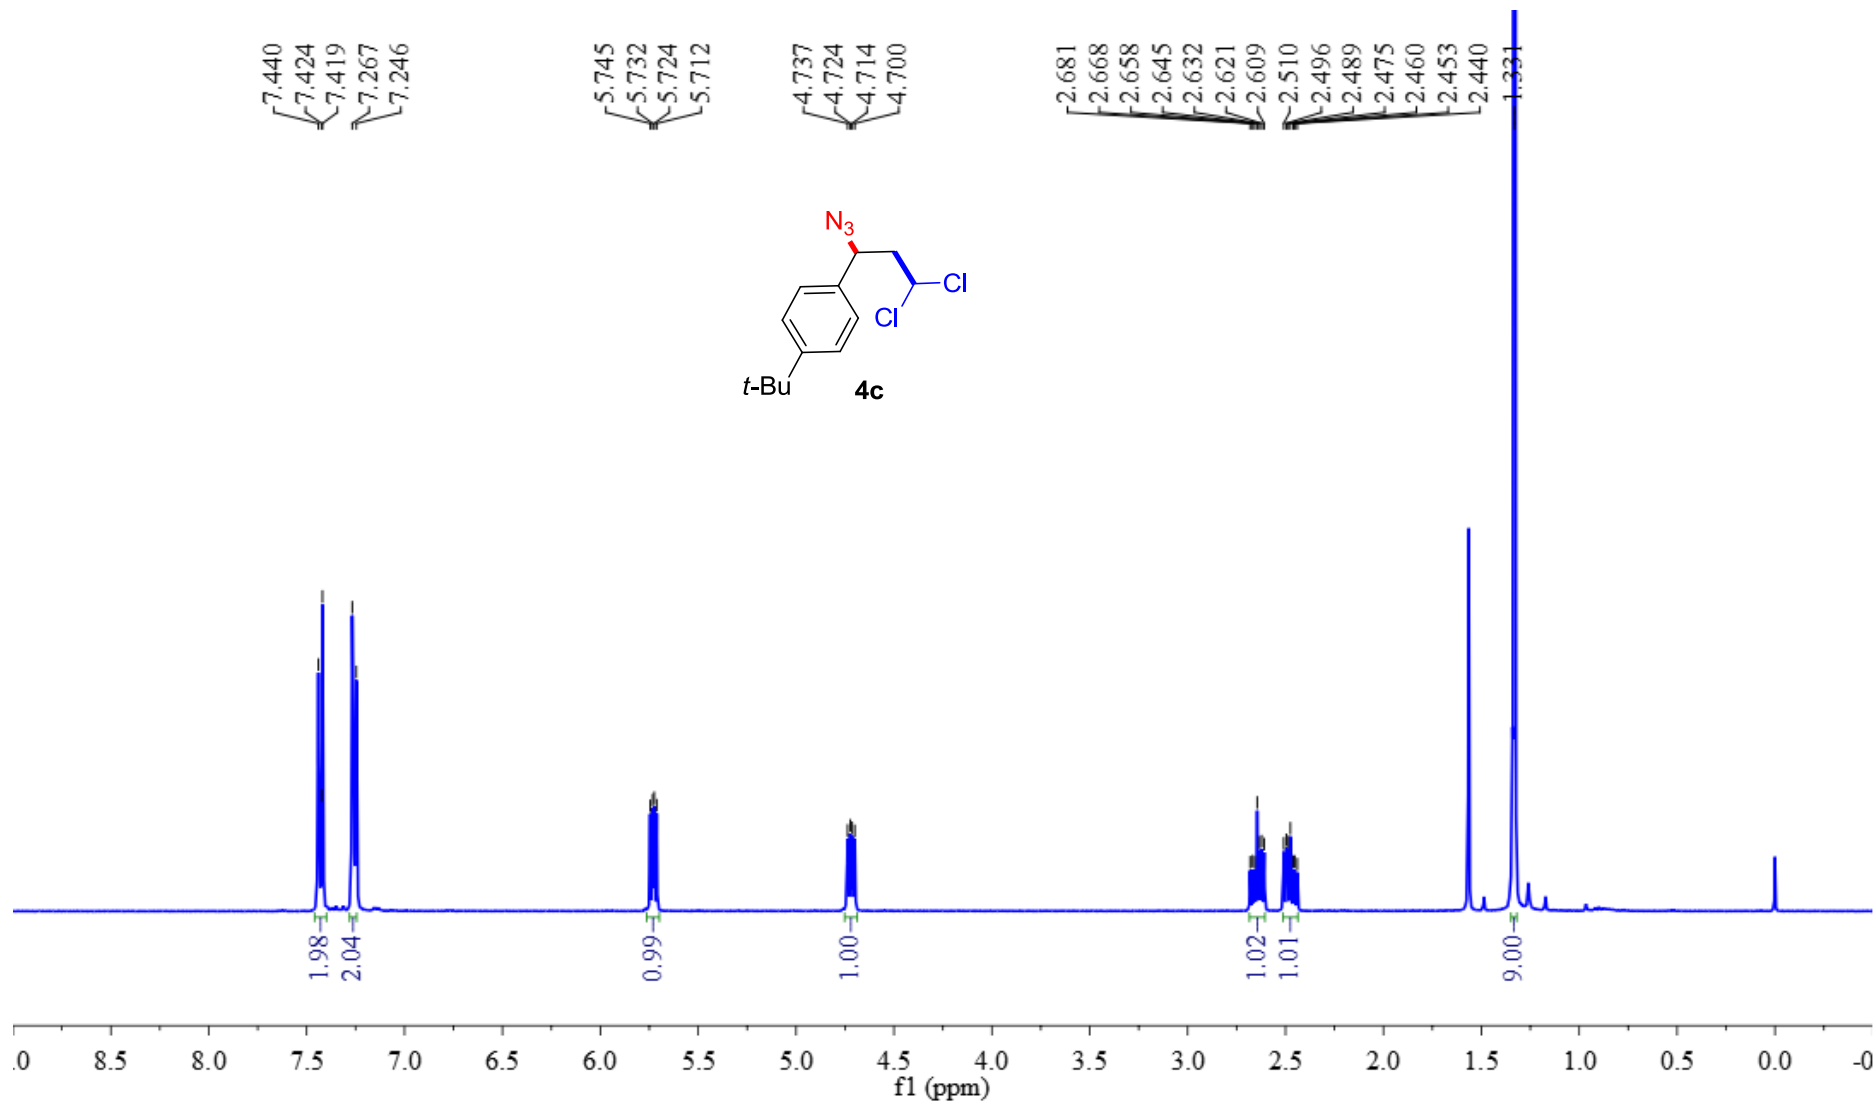



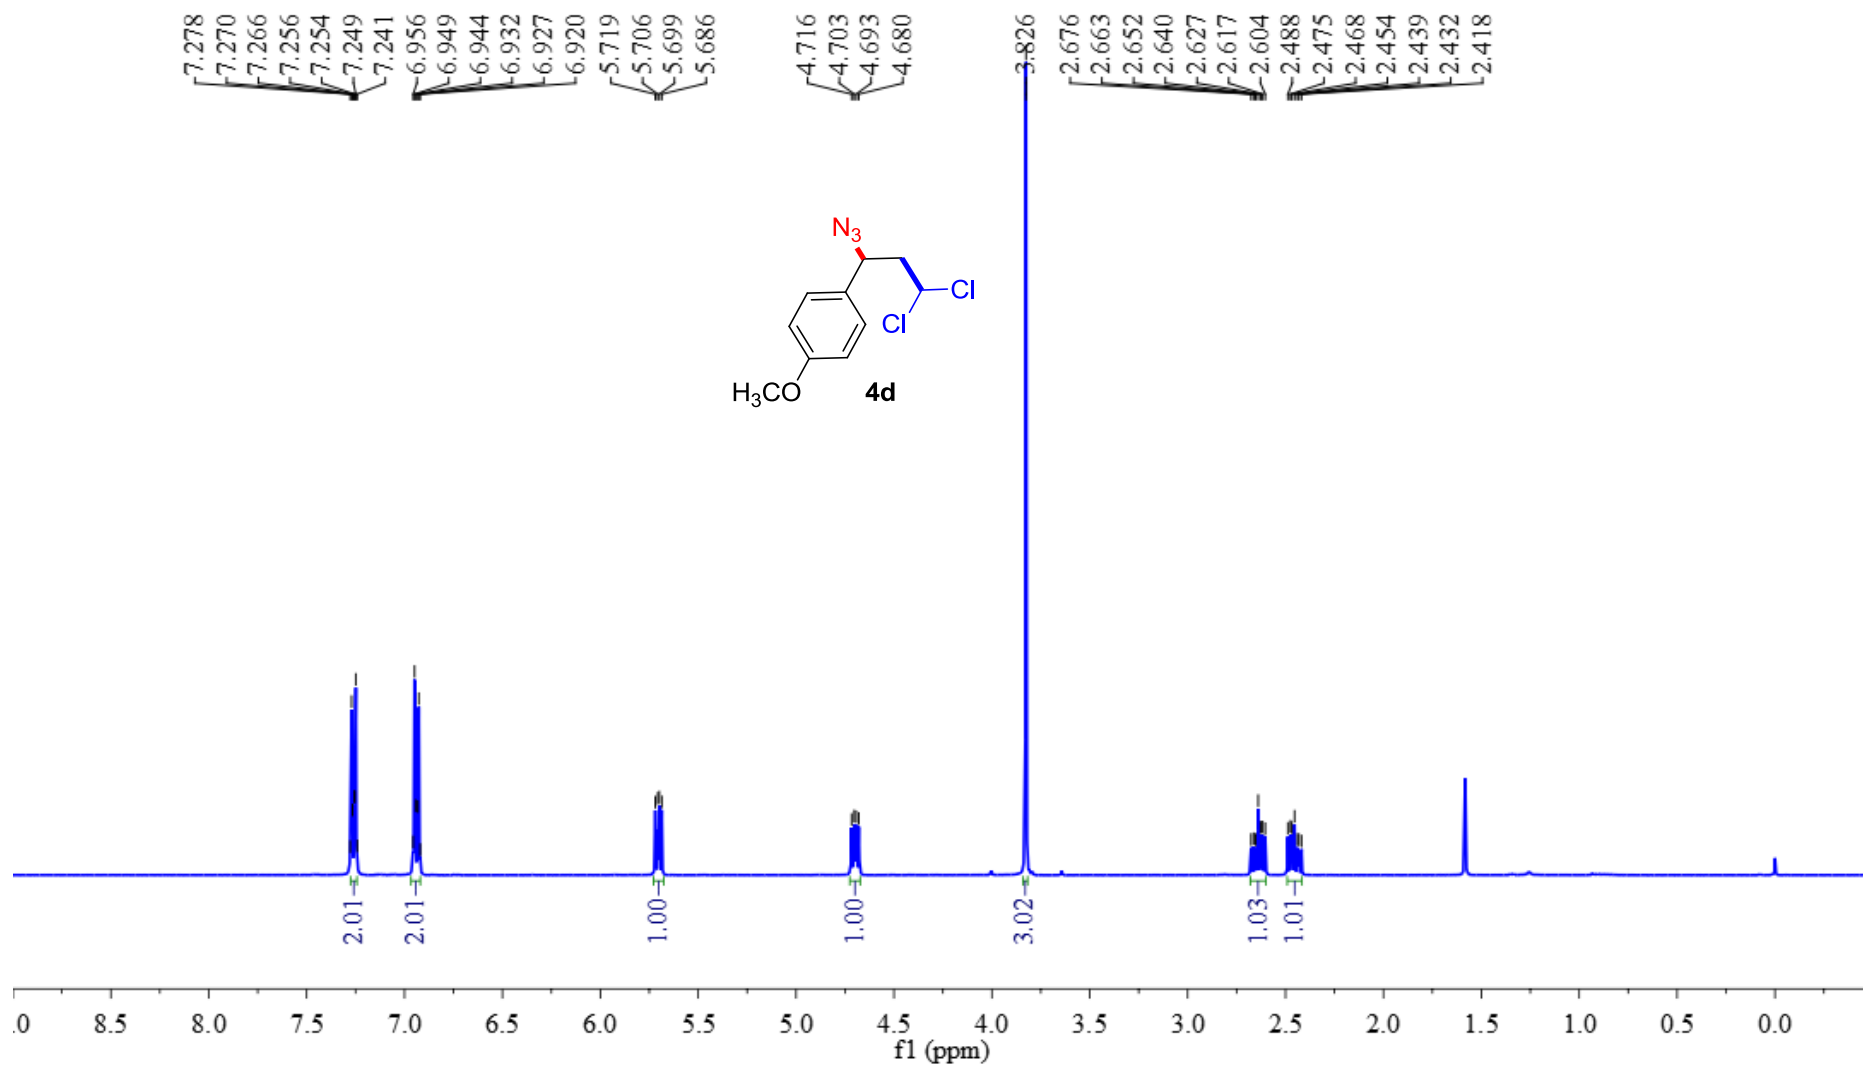



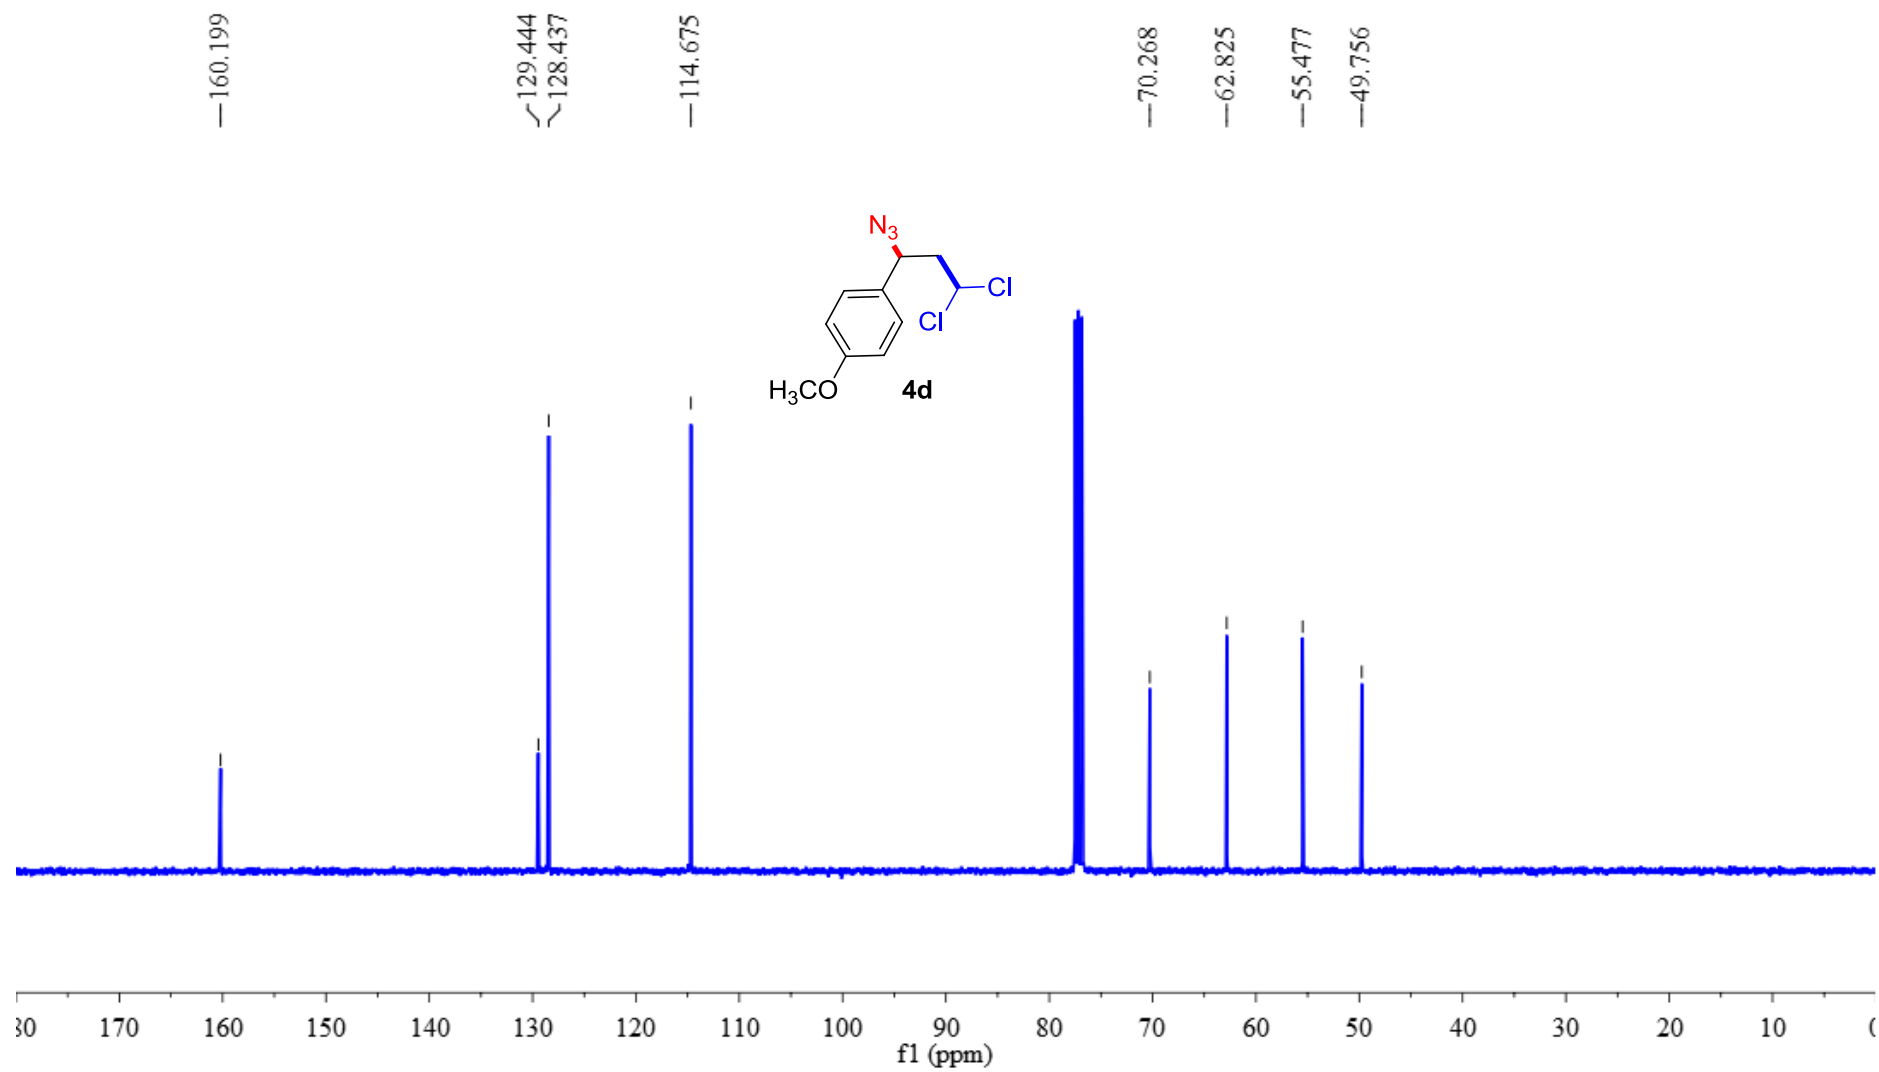

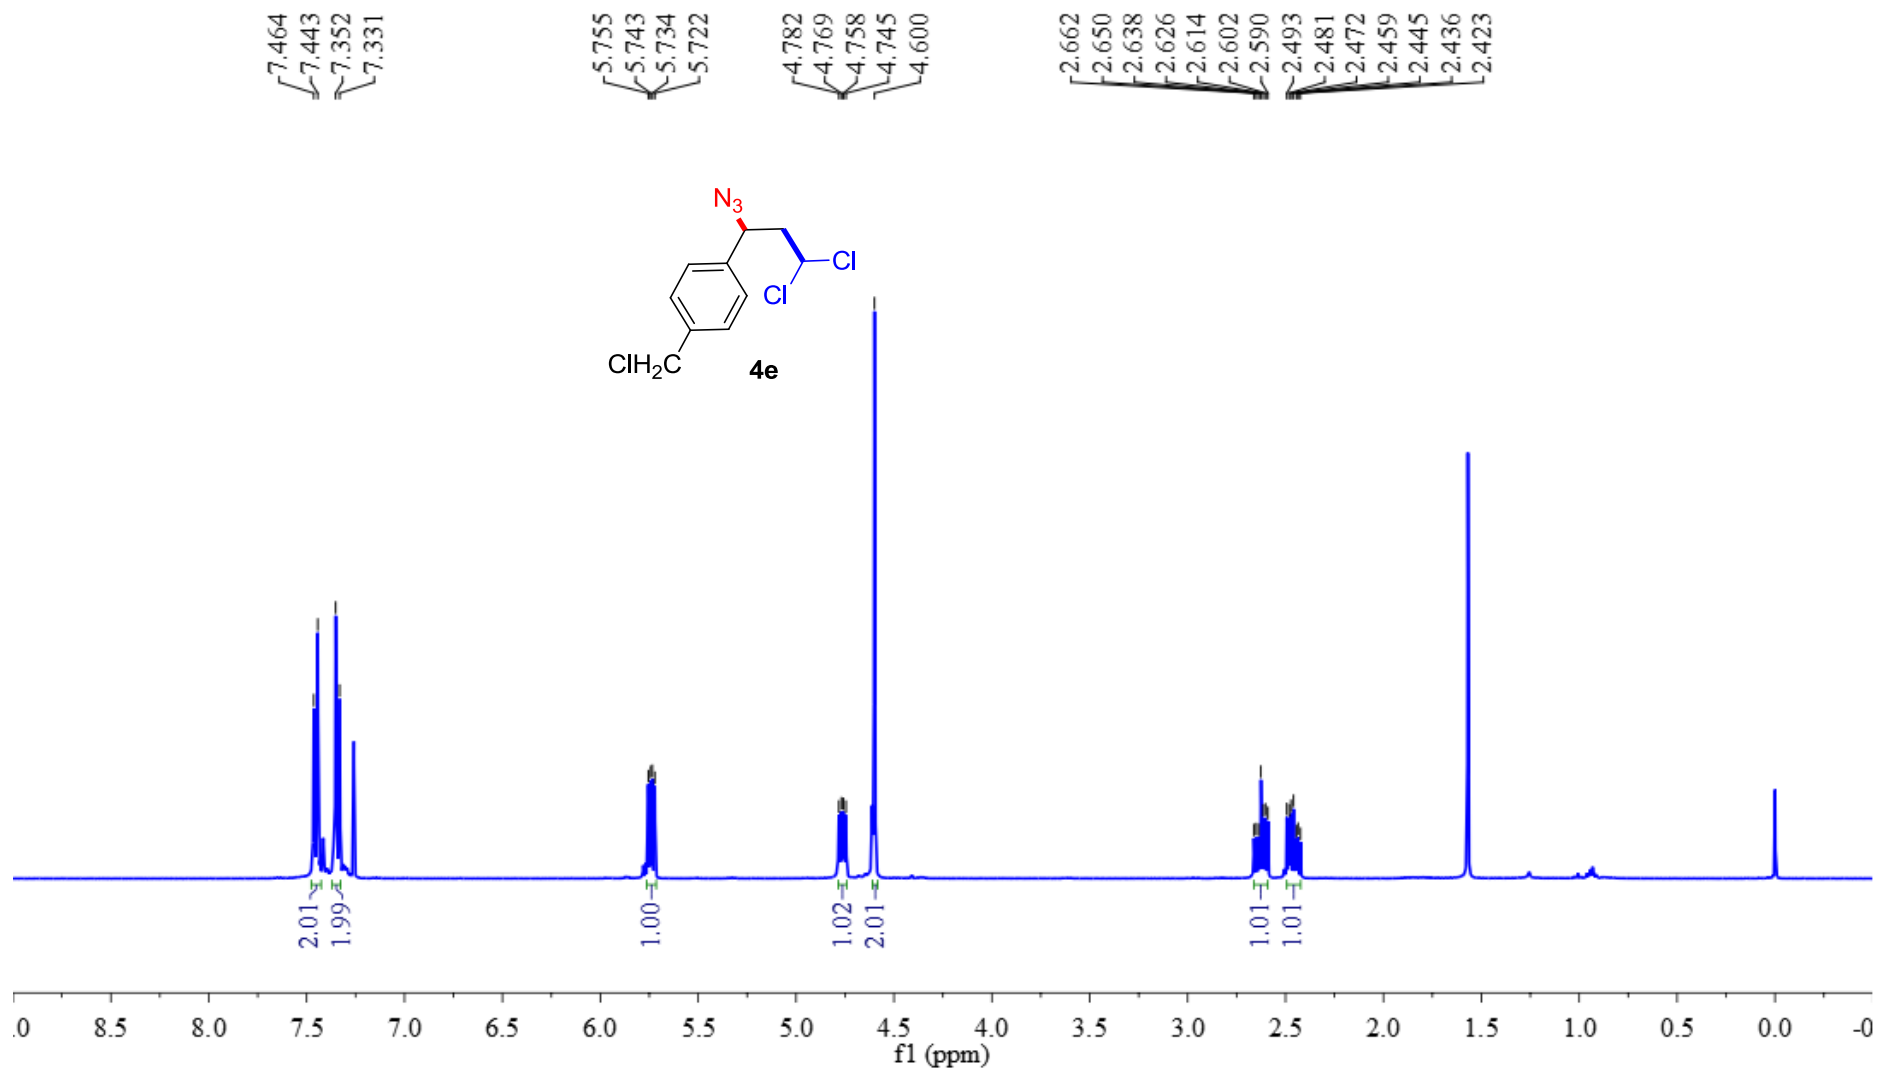

138.505  
137.916

129.549  
127.473

70.044

62.951

49.822

45.646

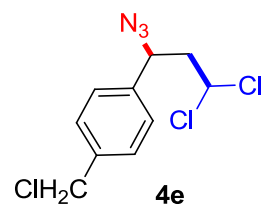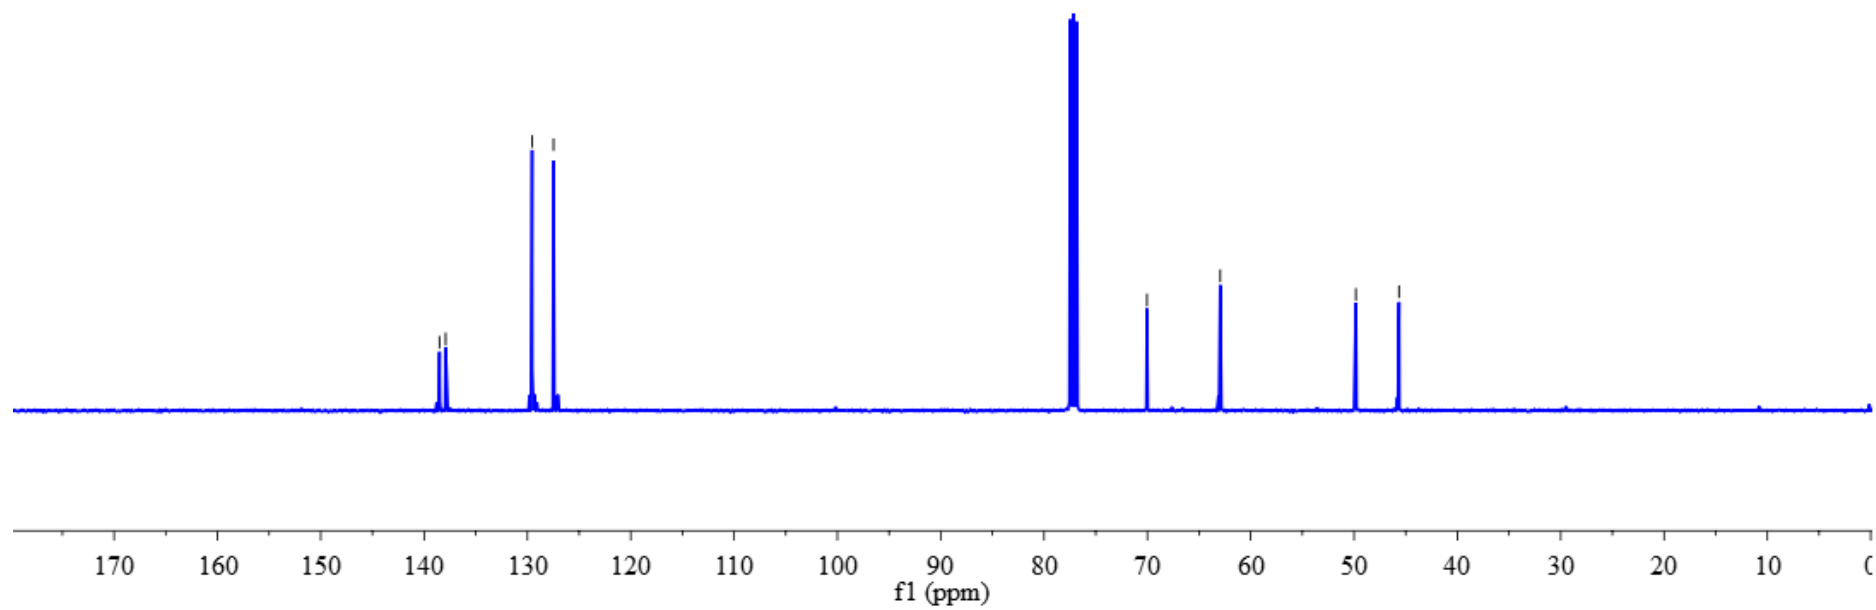

S66

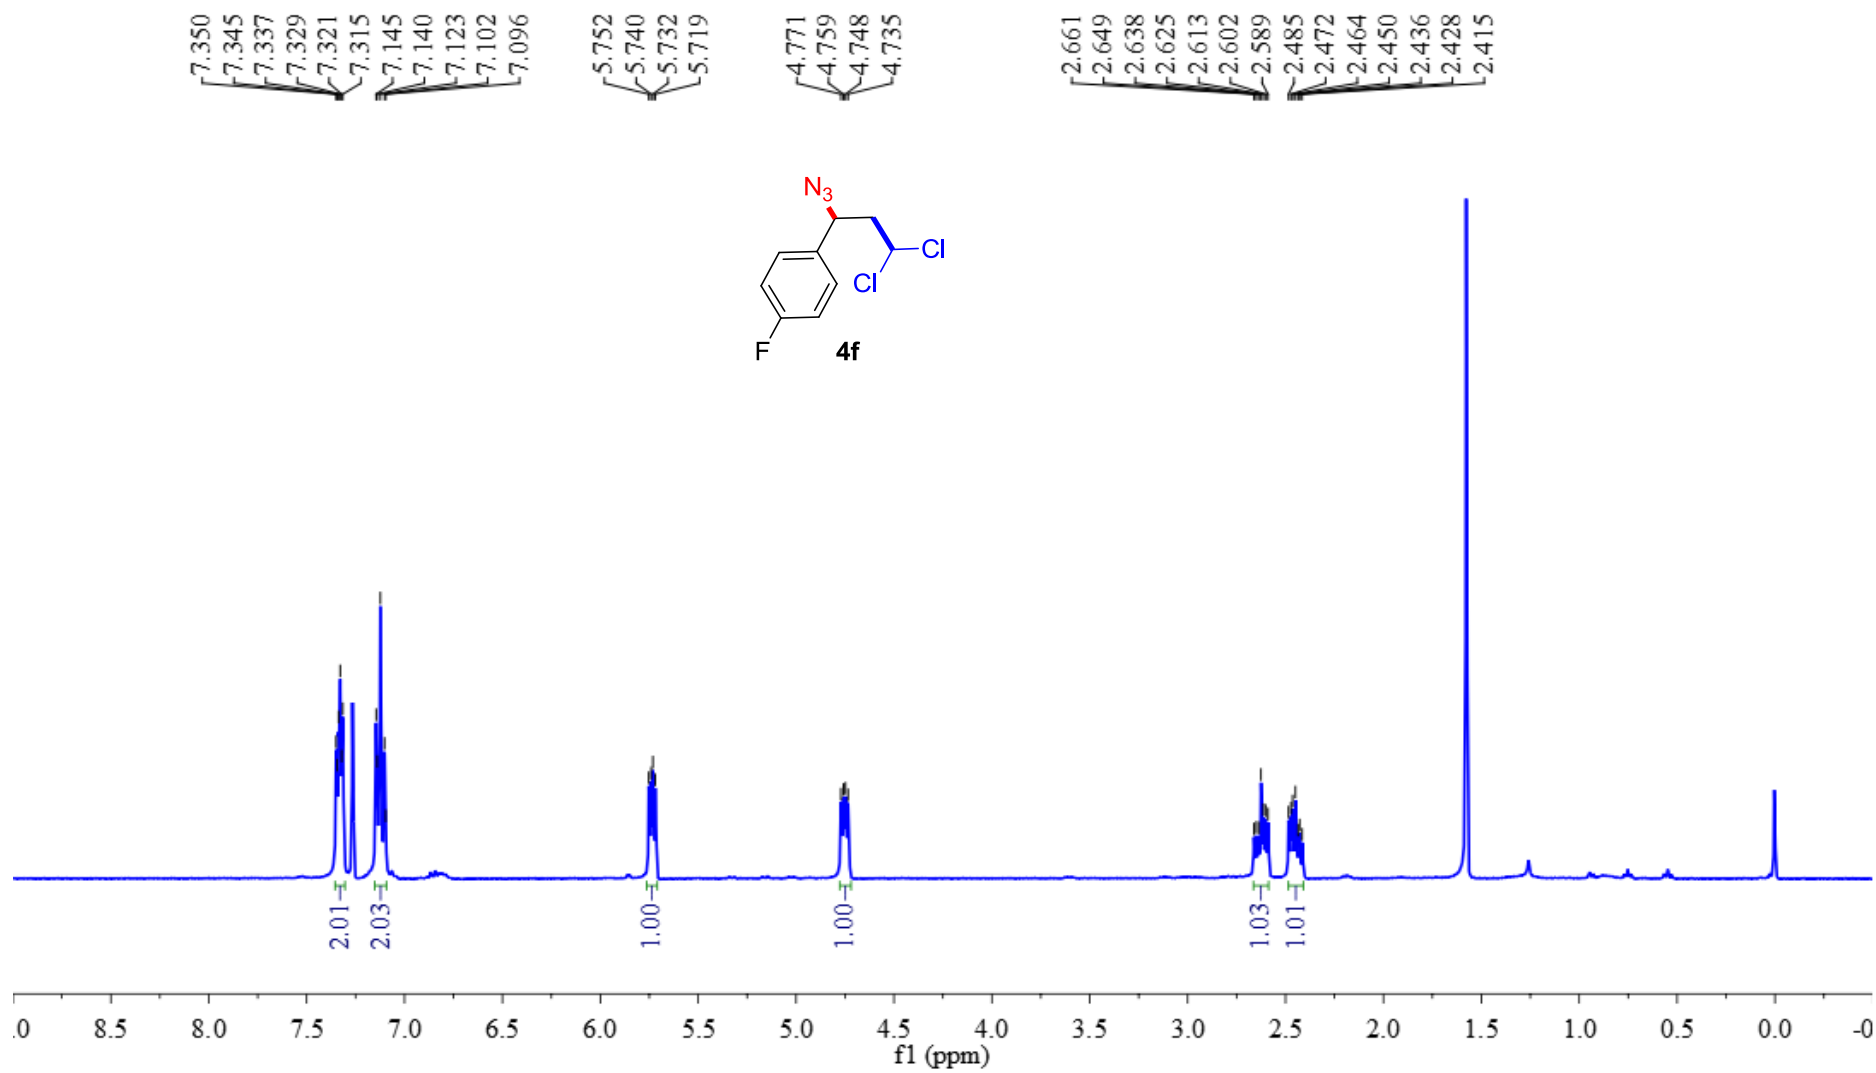

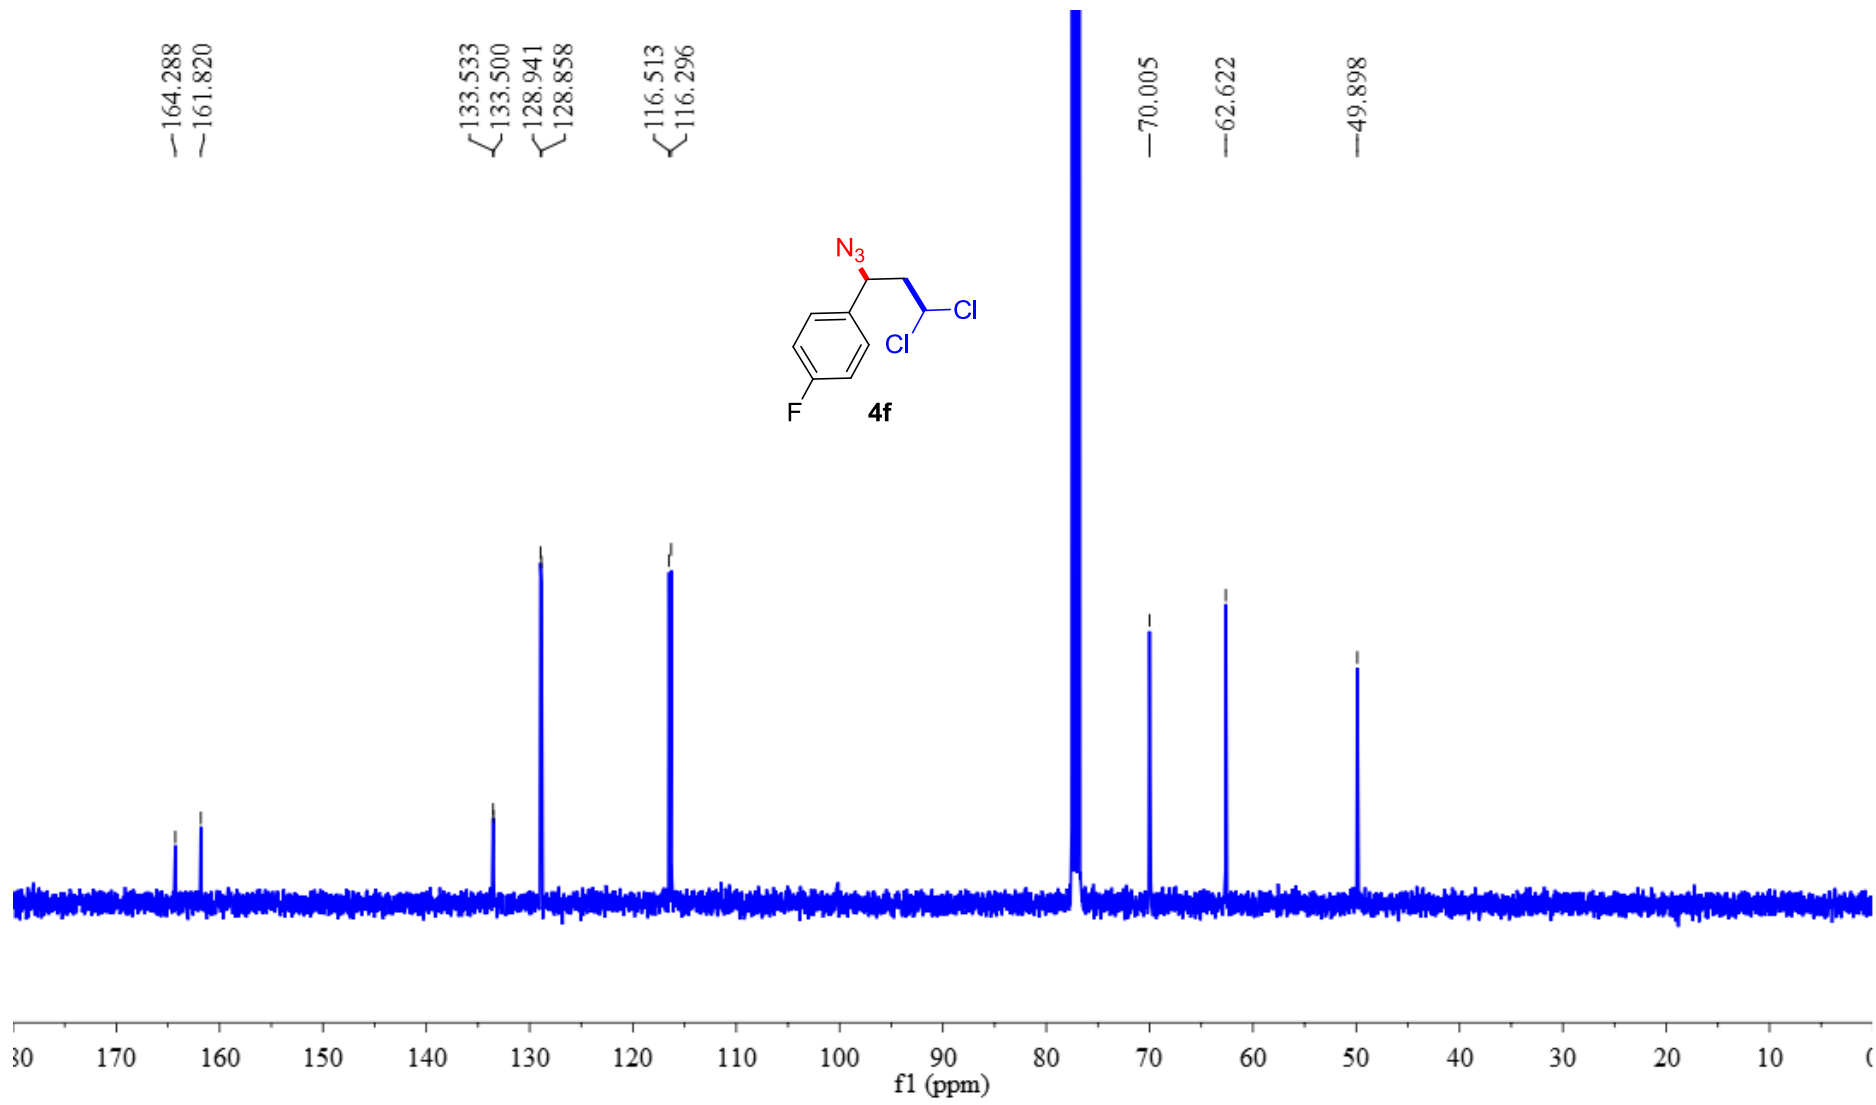

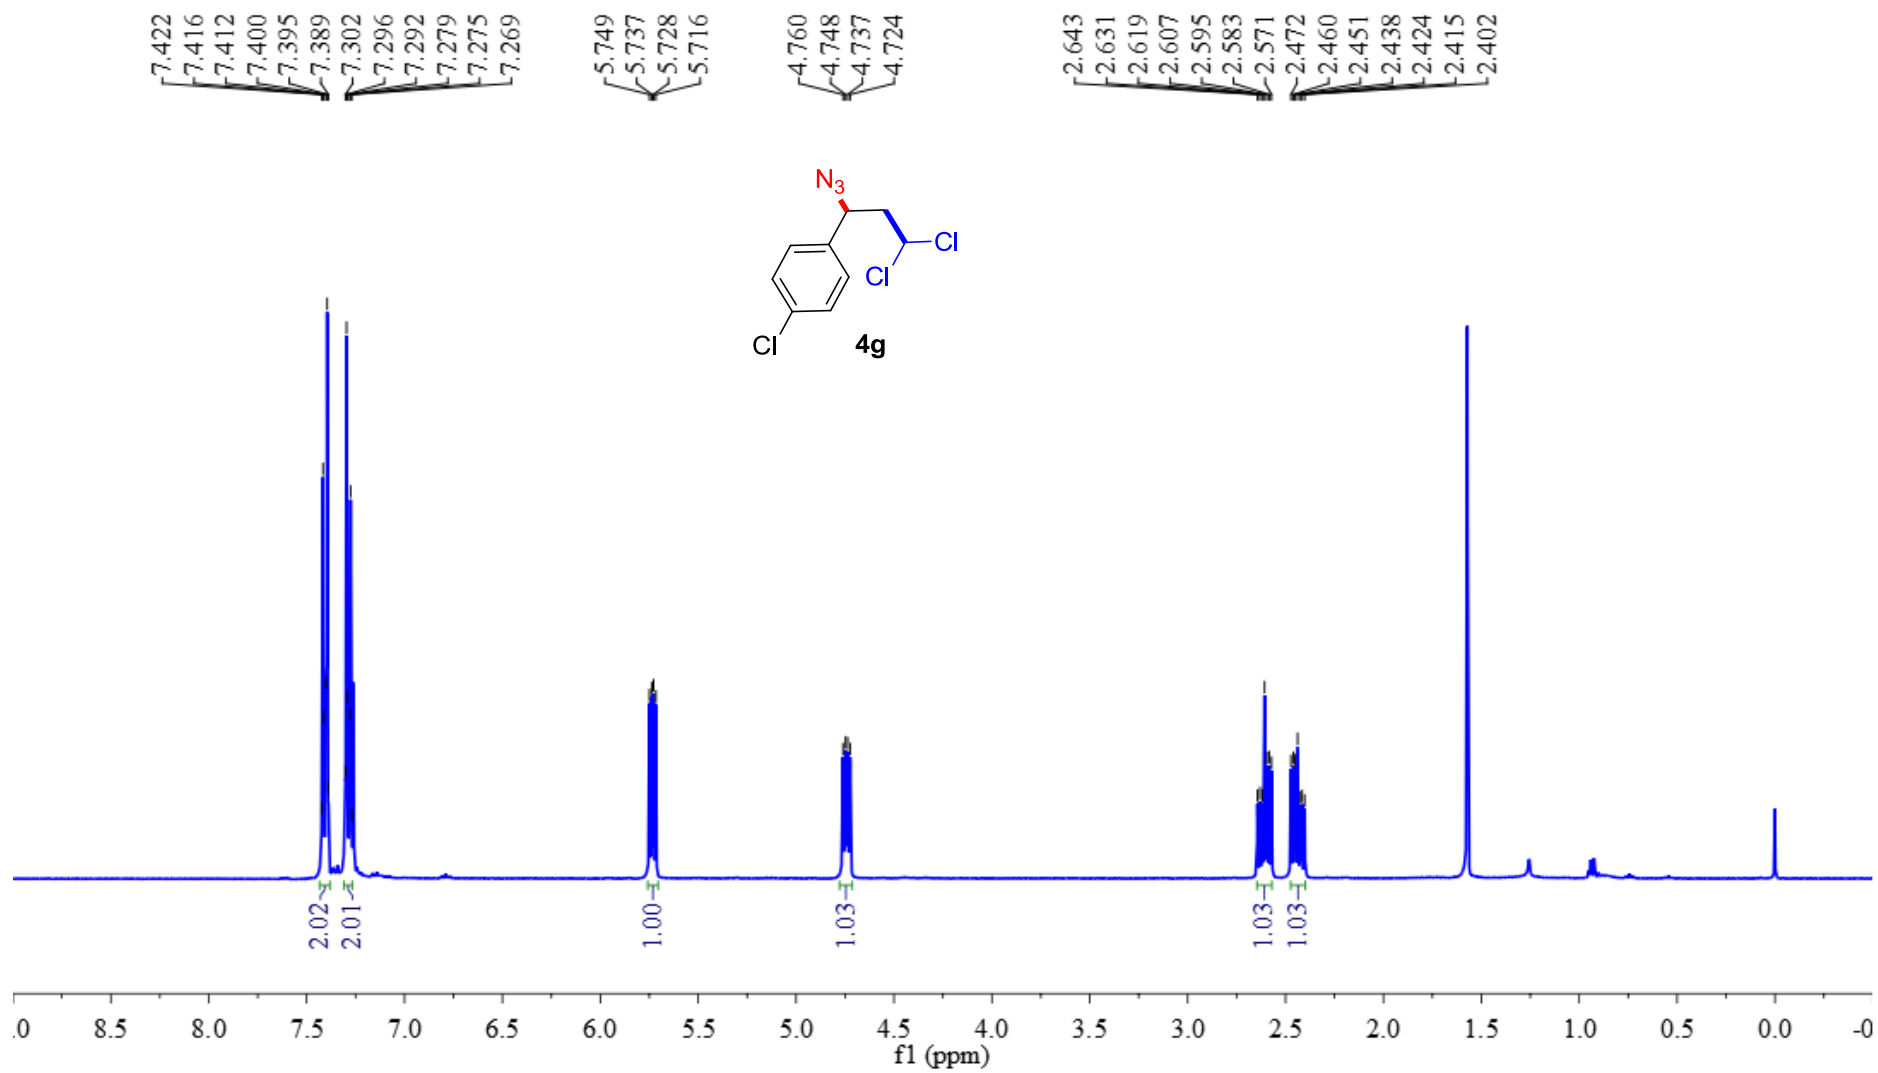

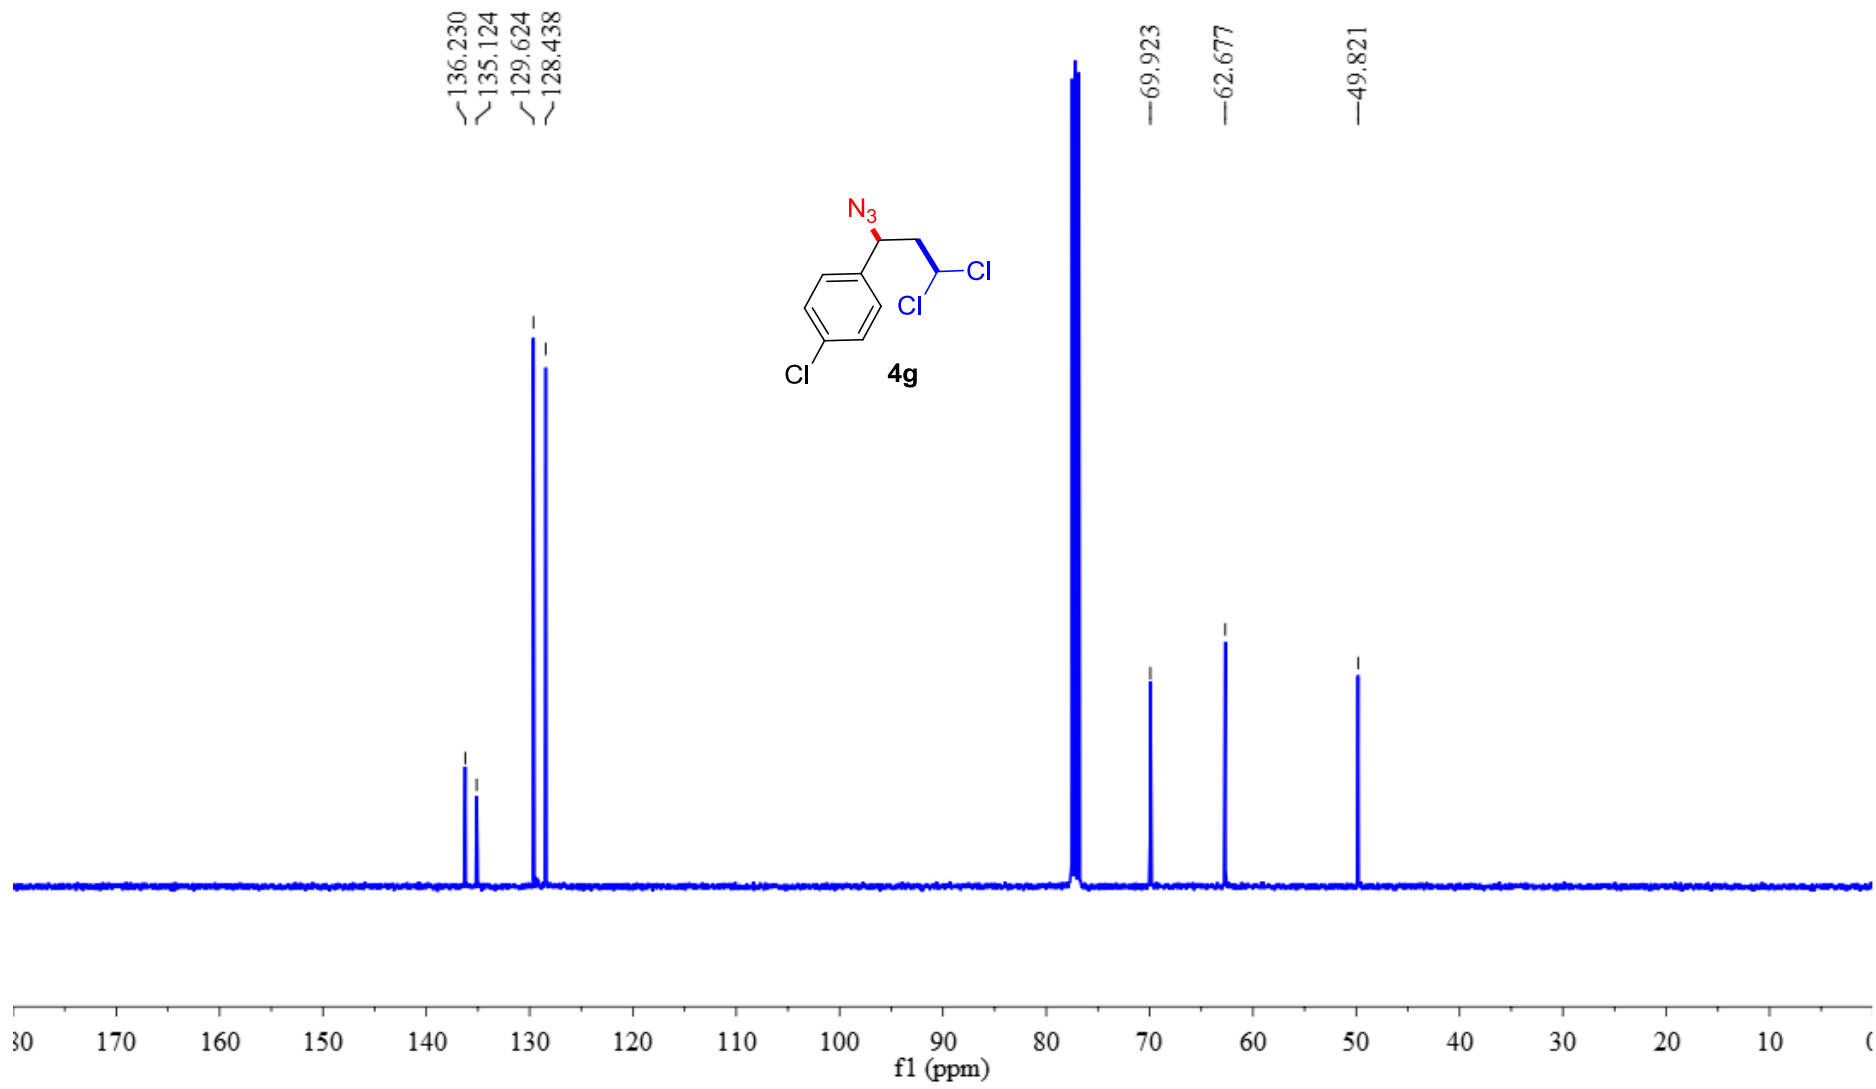

S70

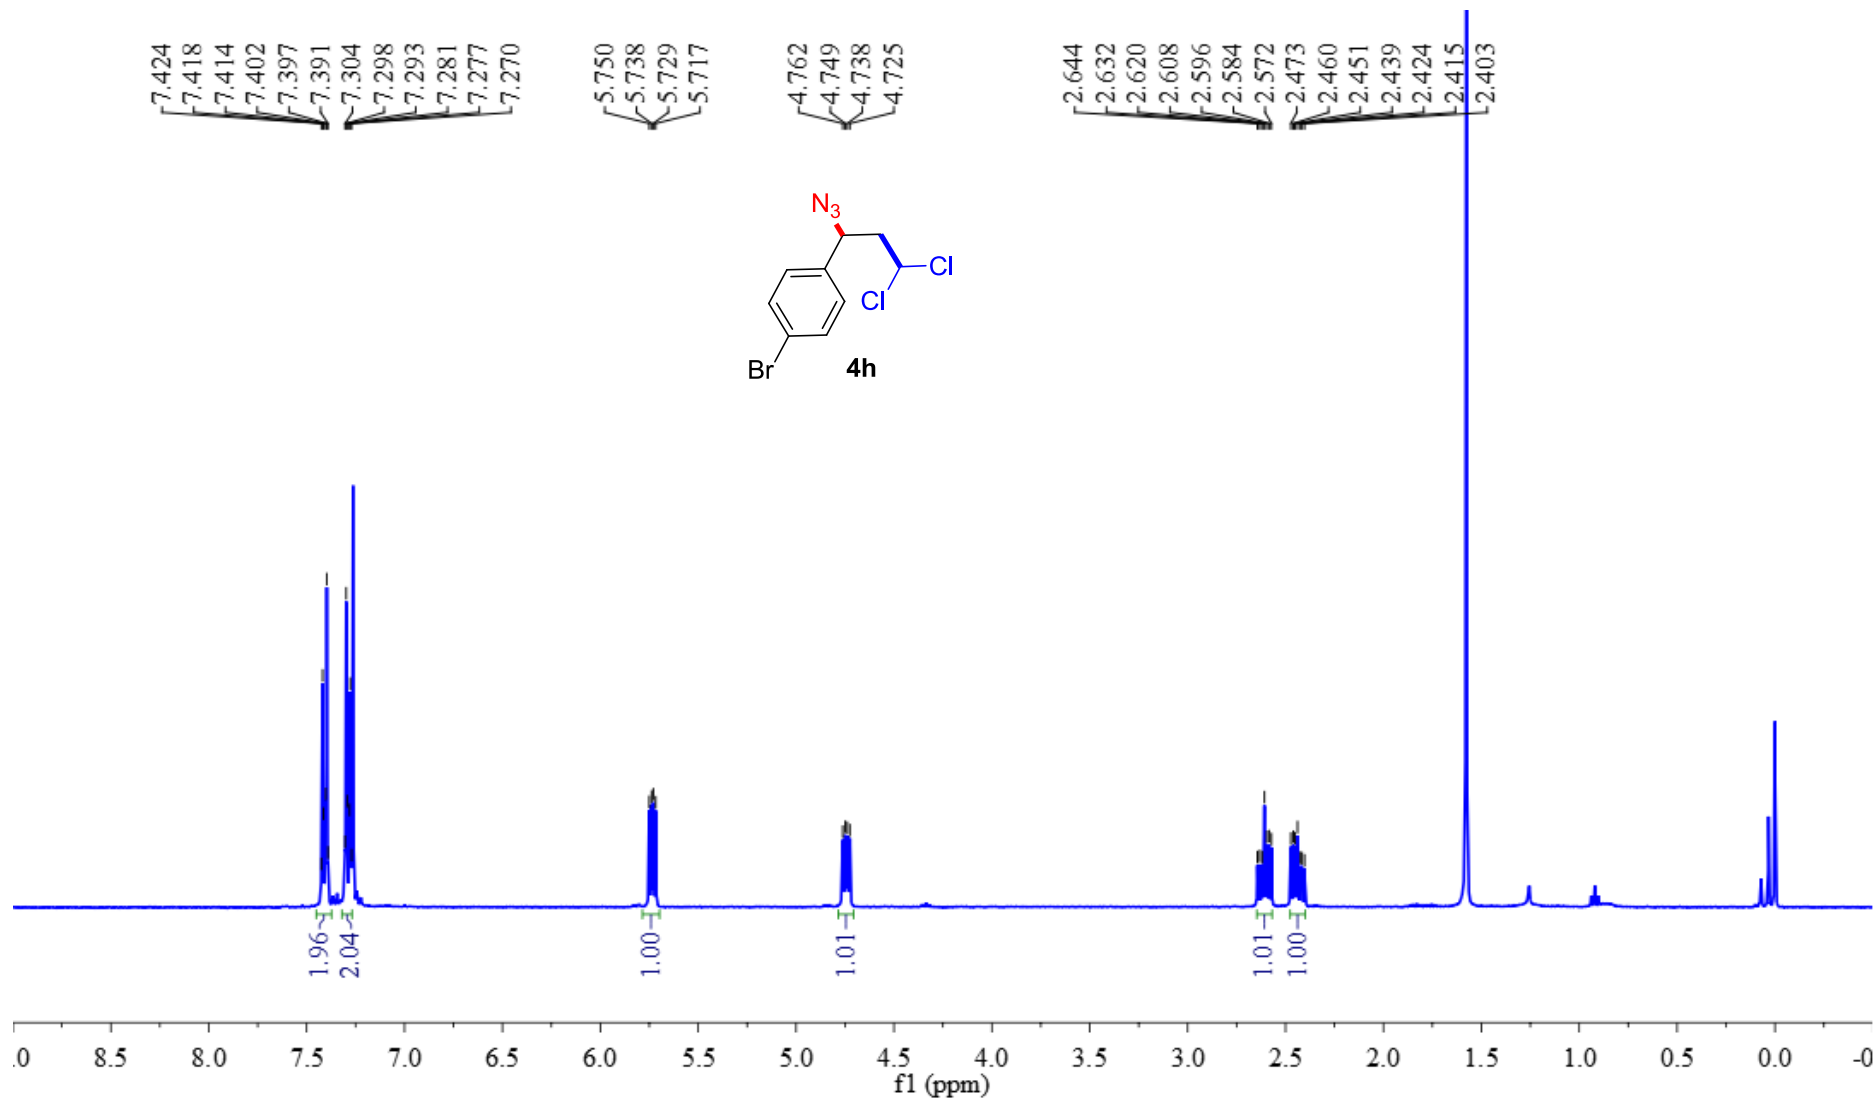



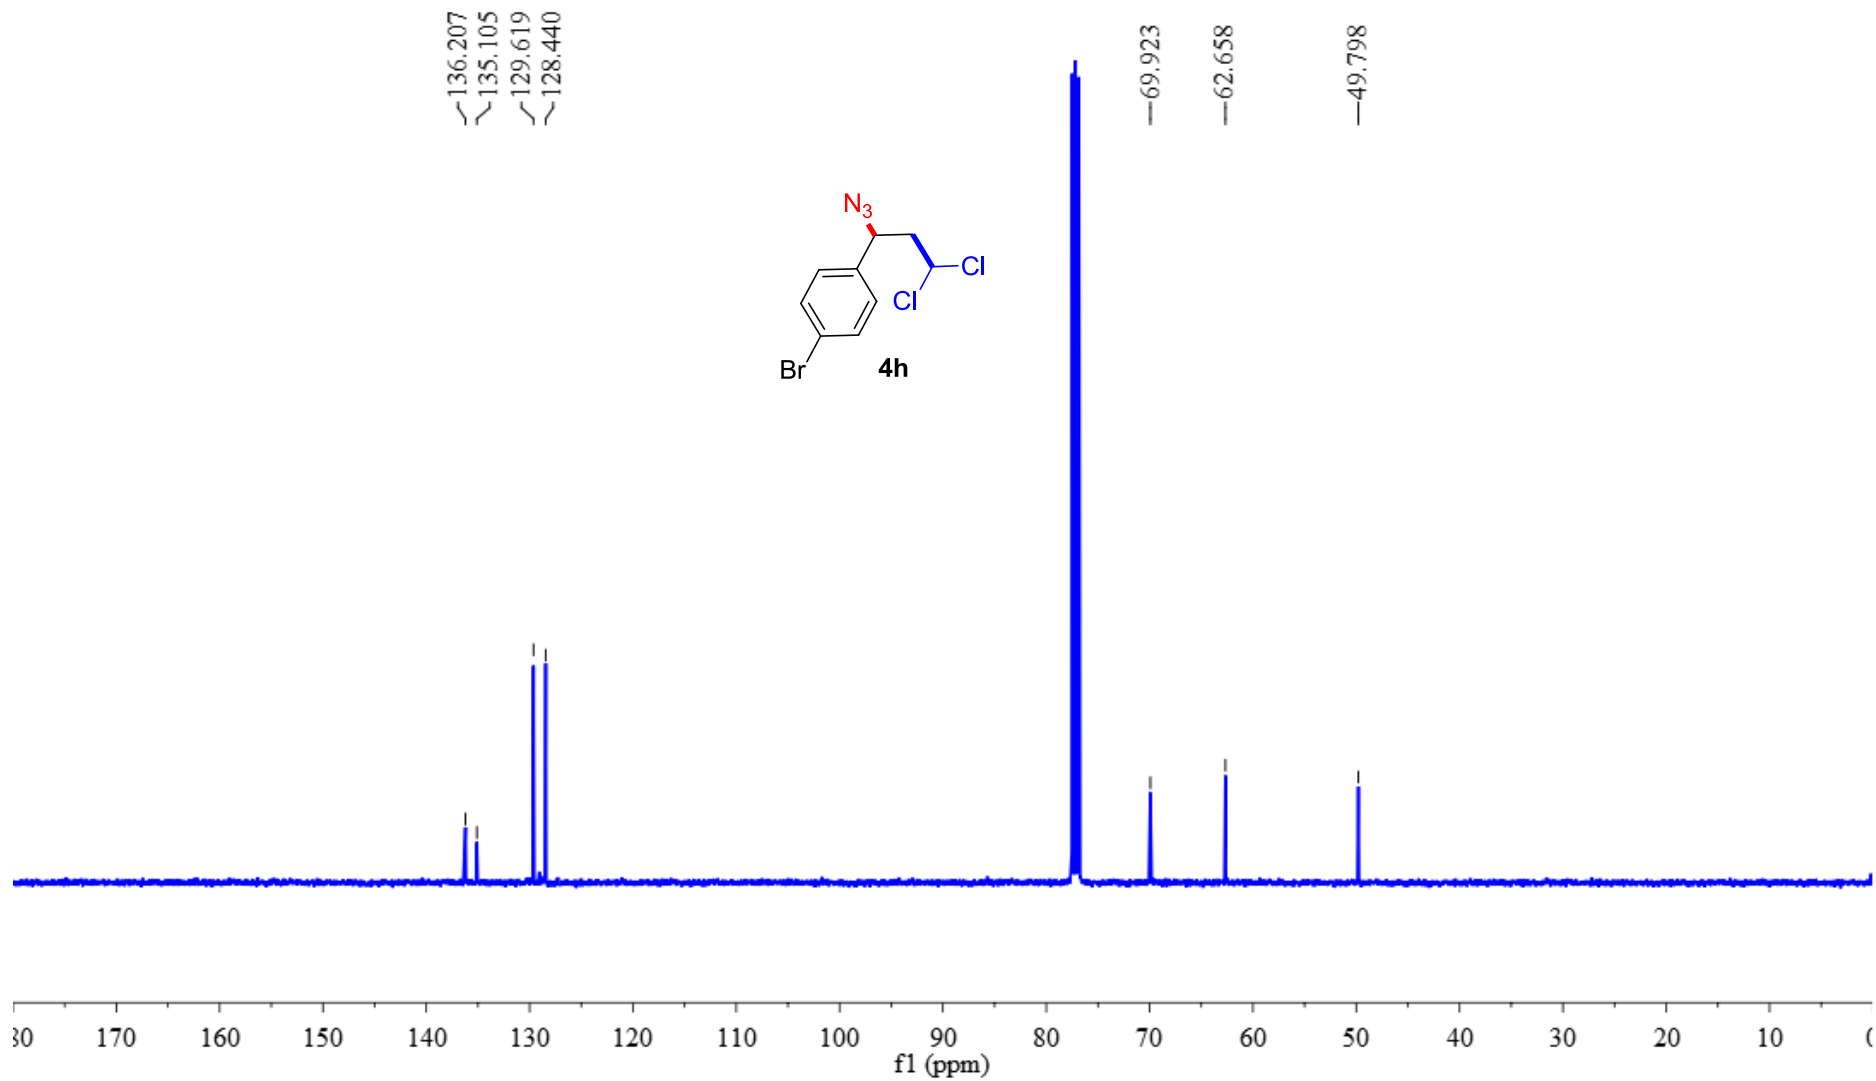

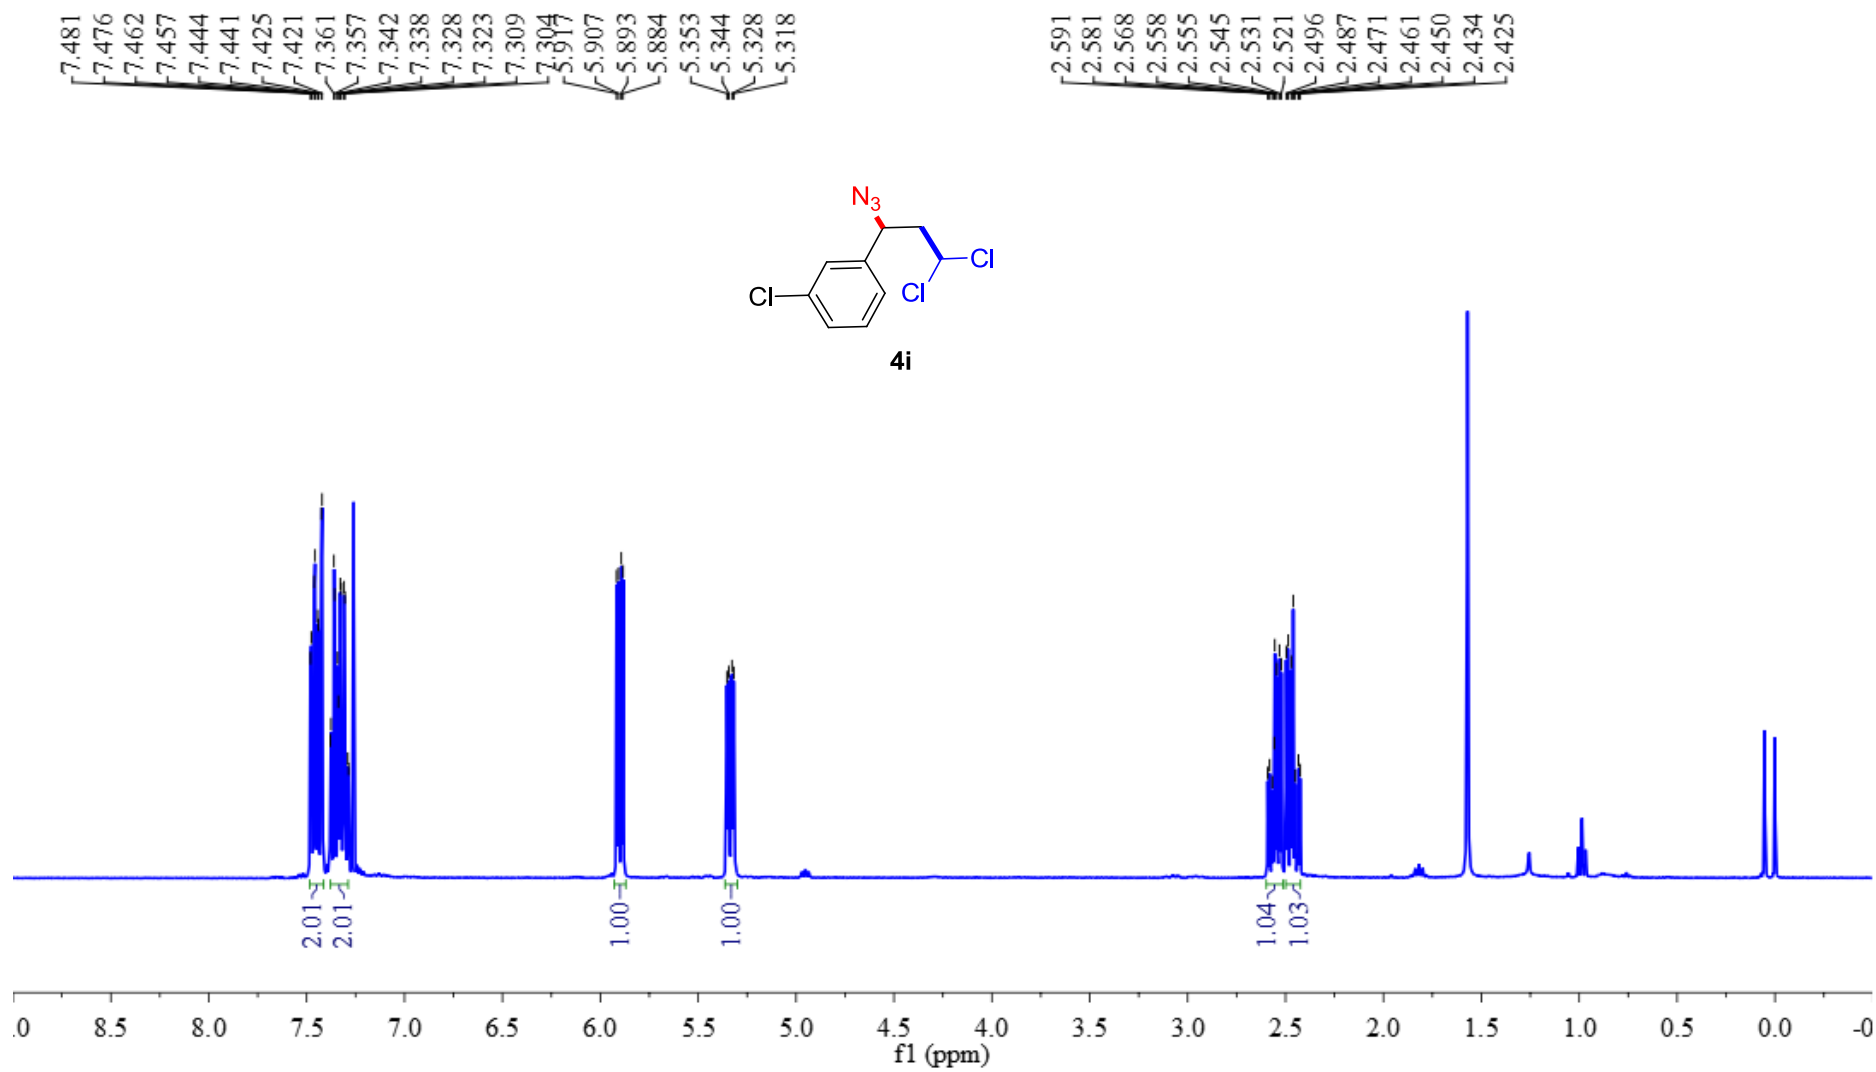

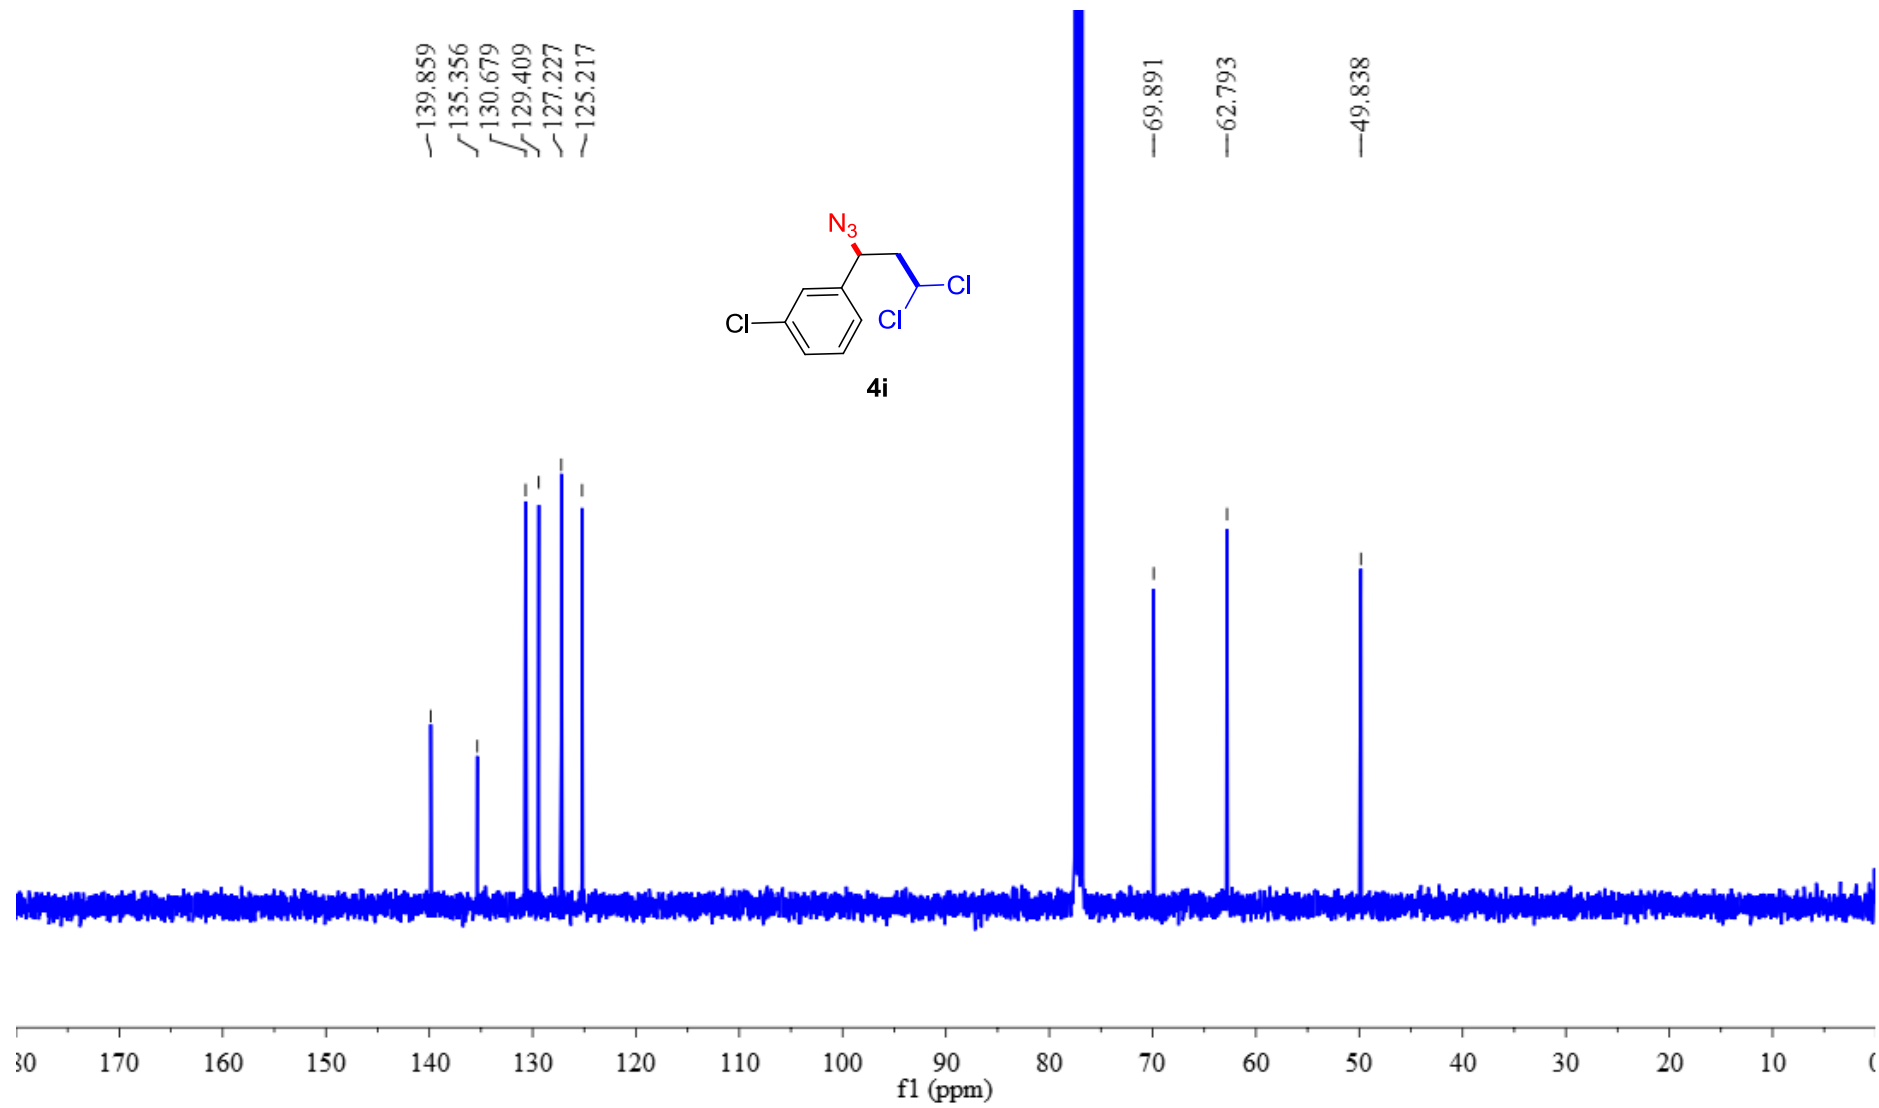

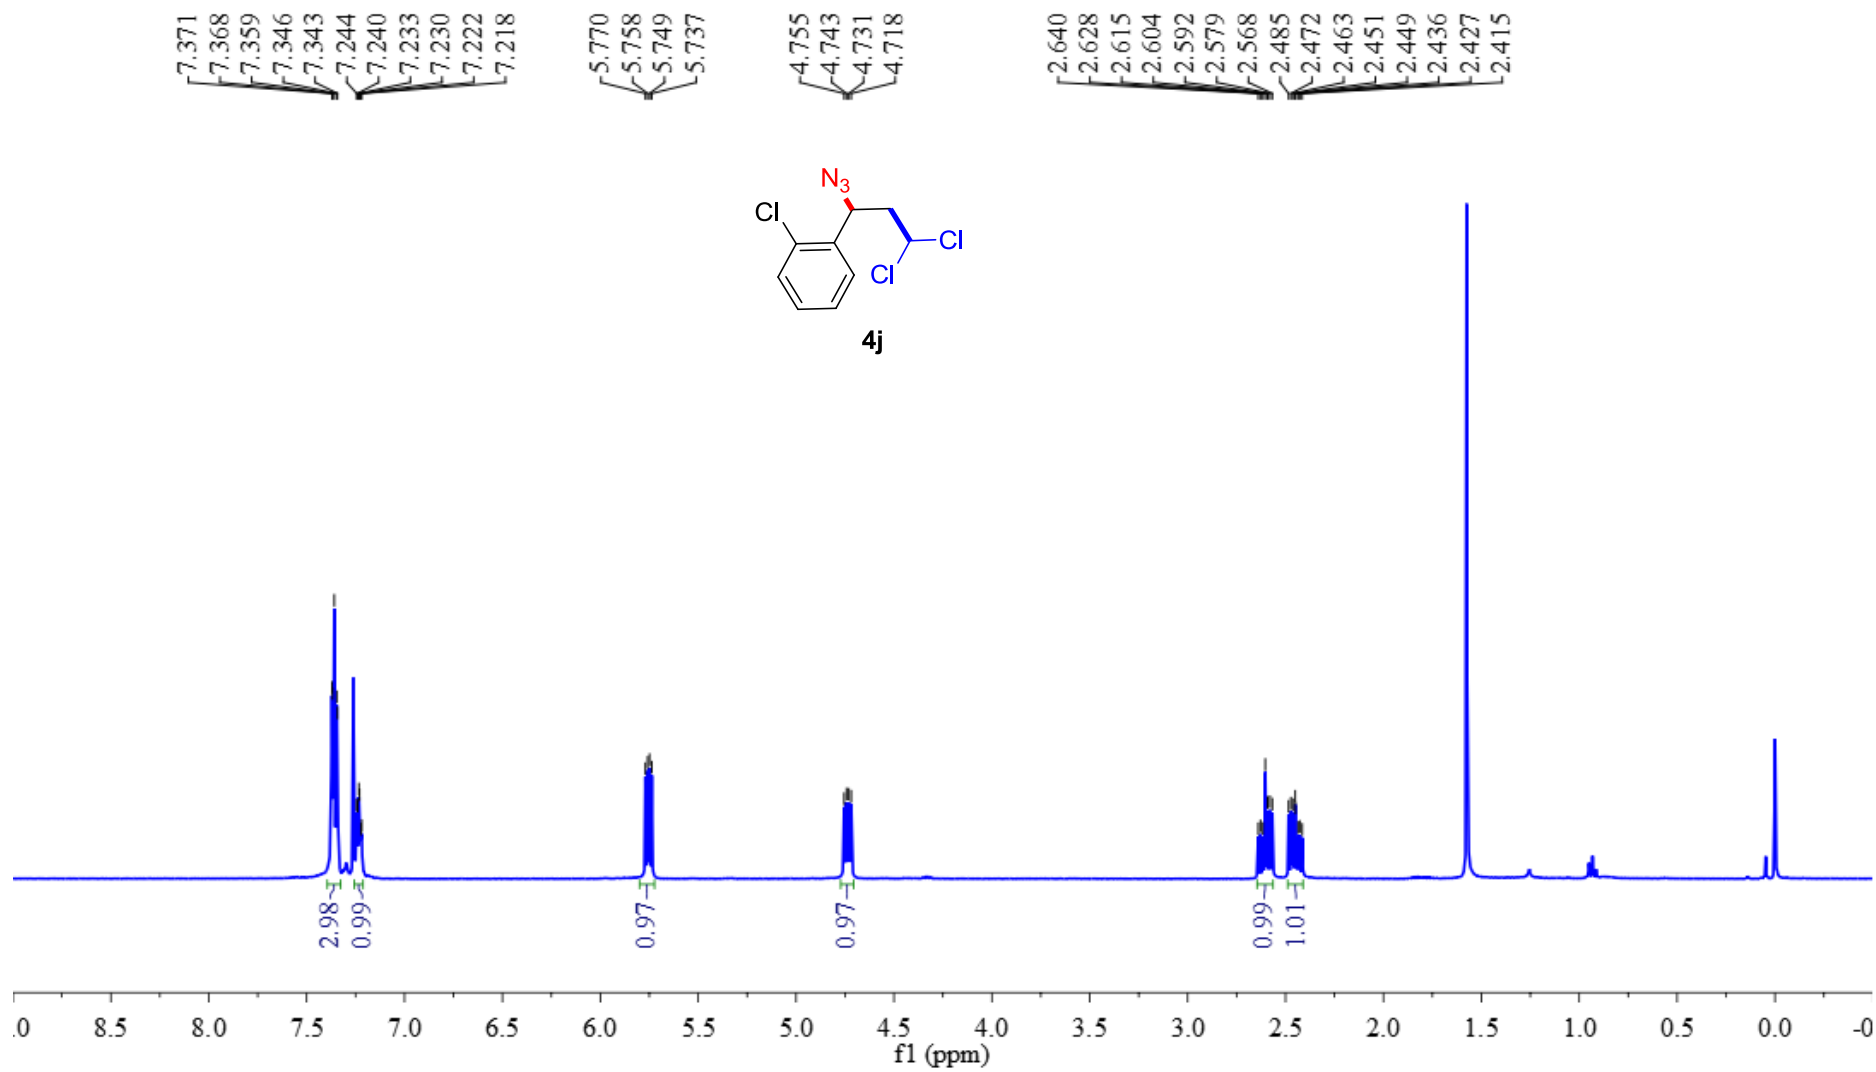

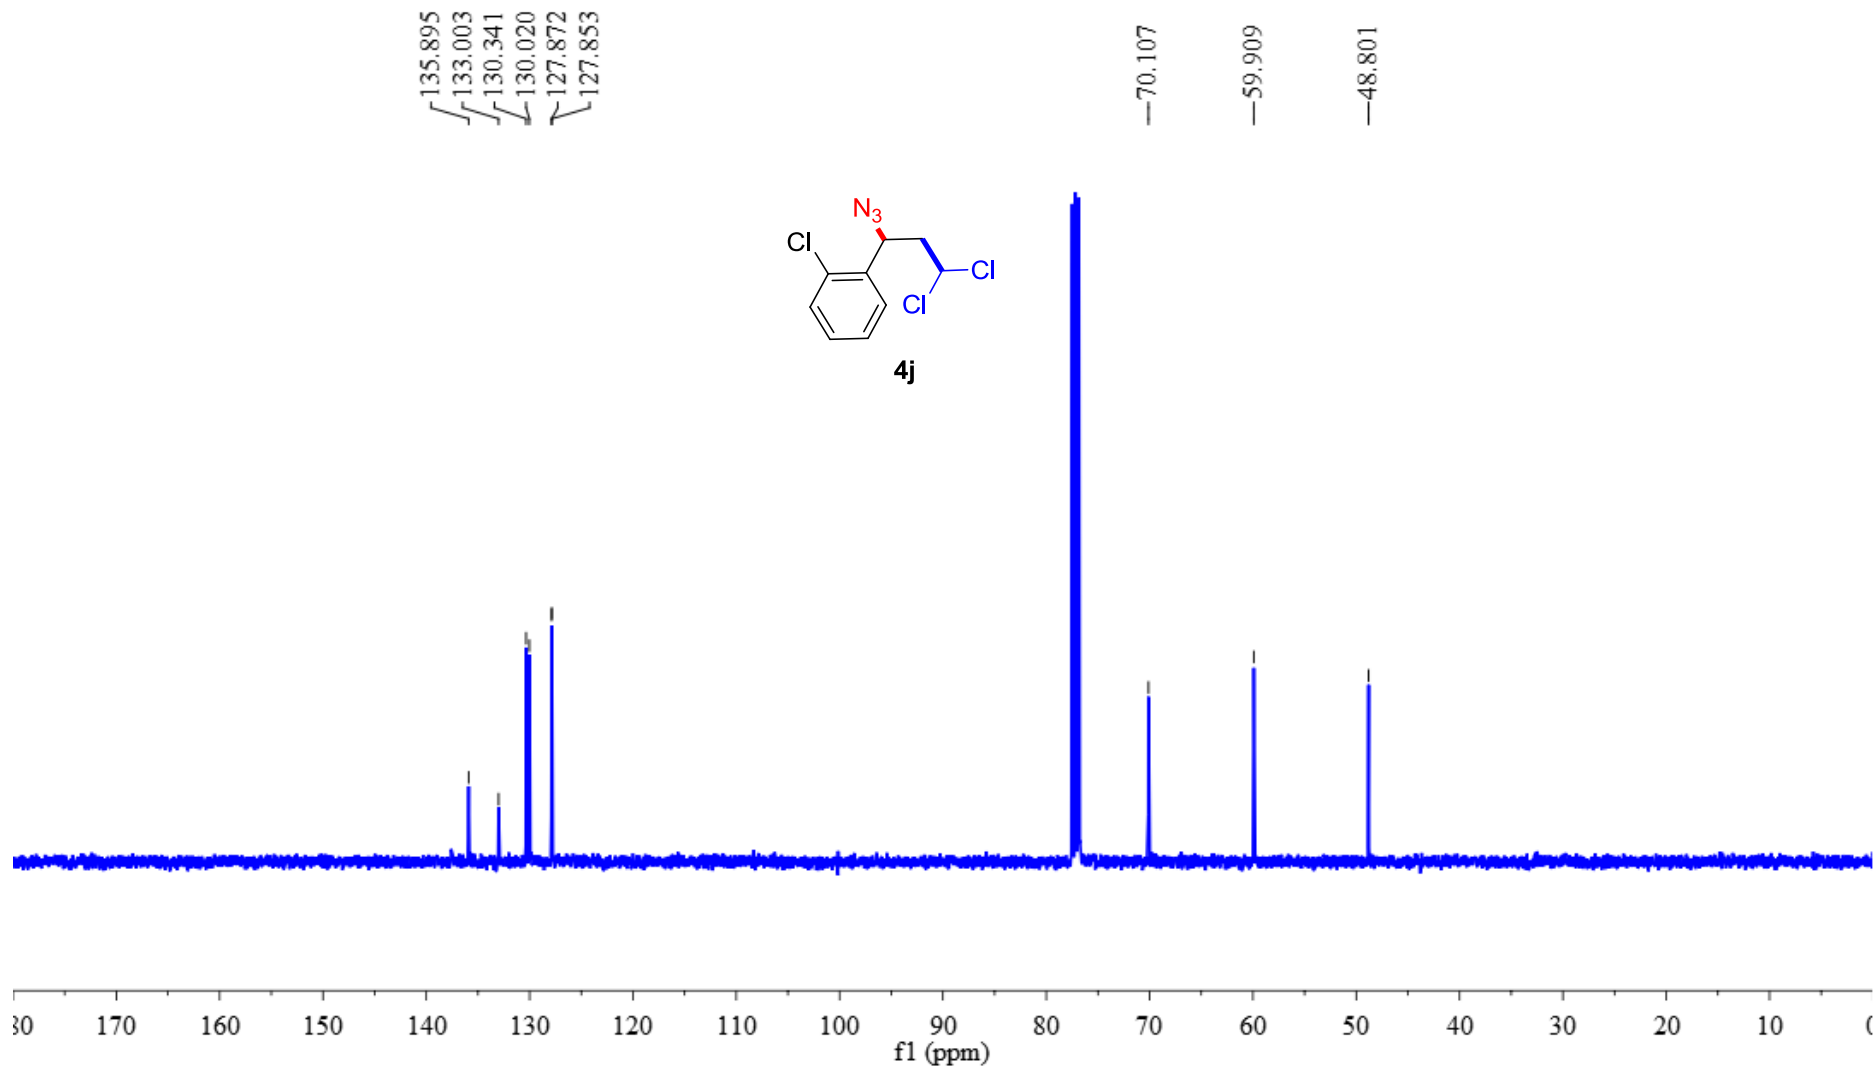

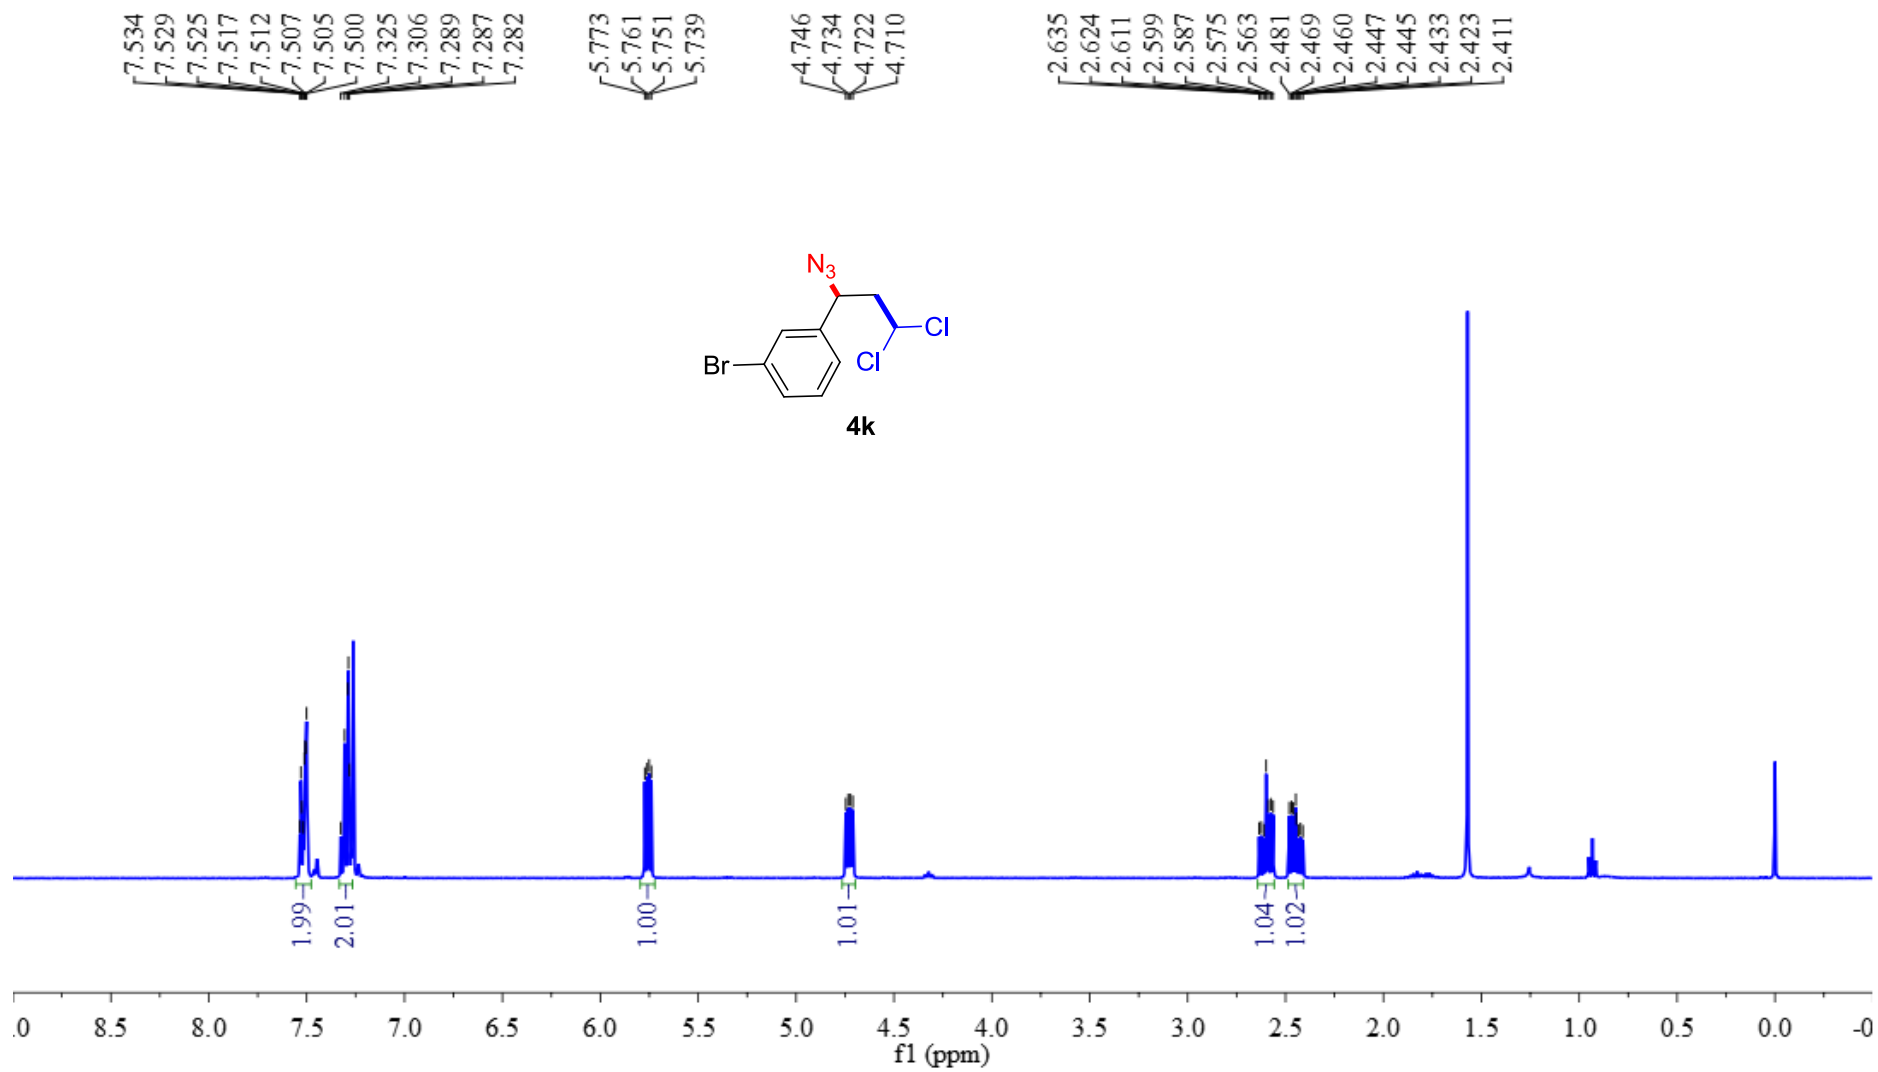

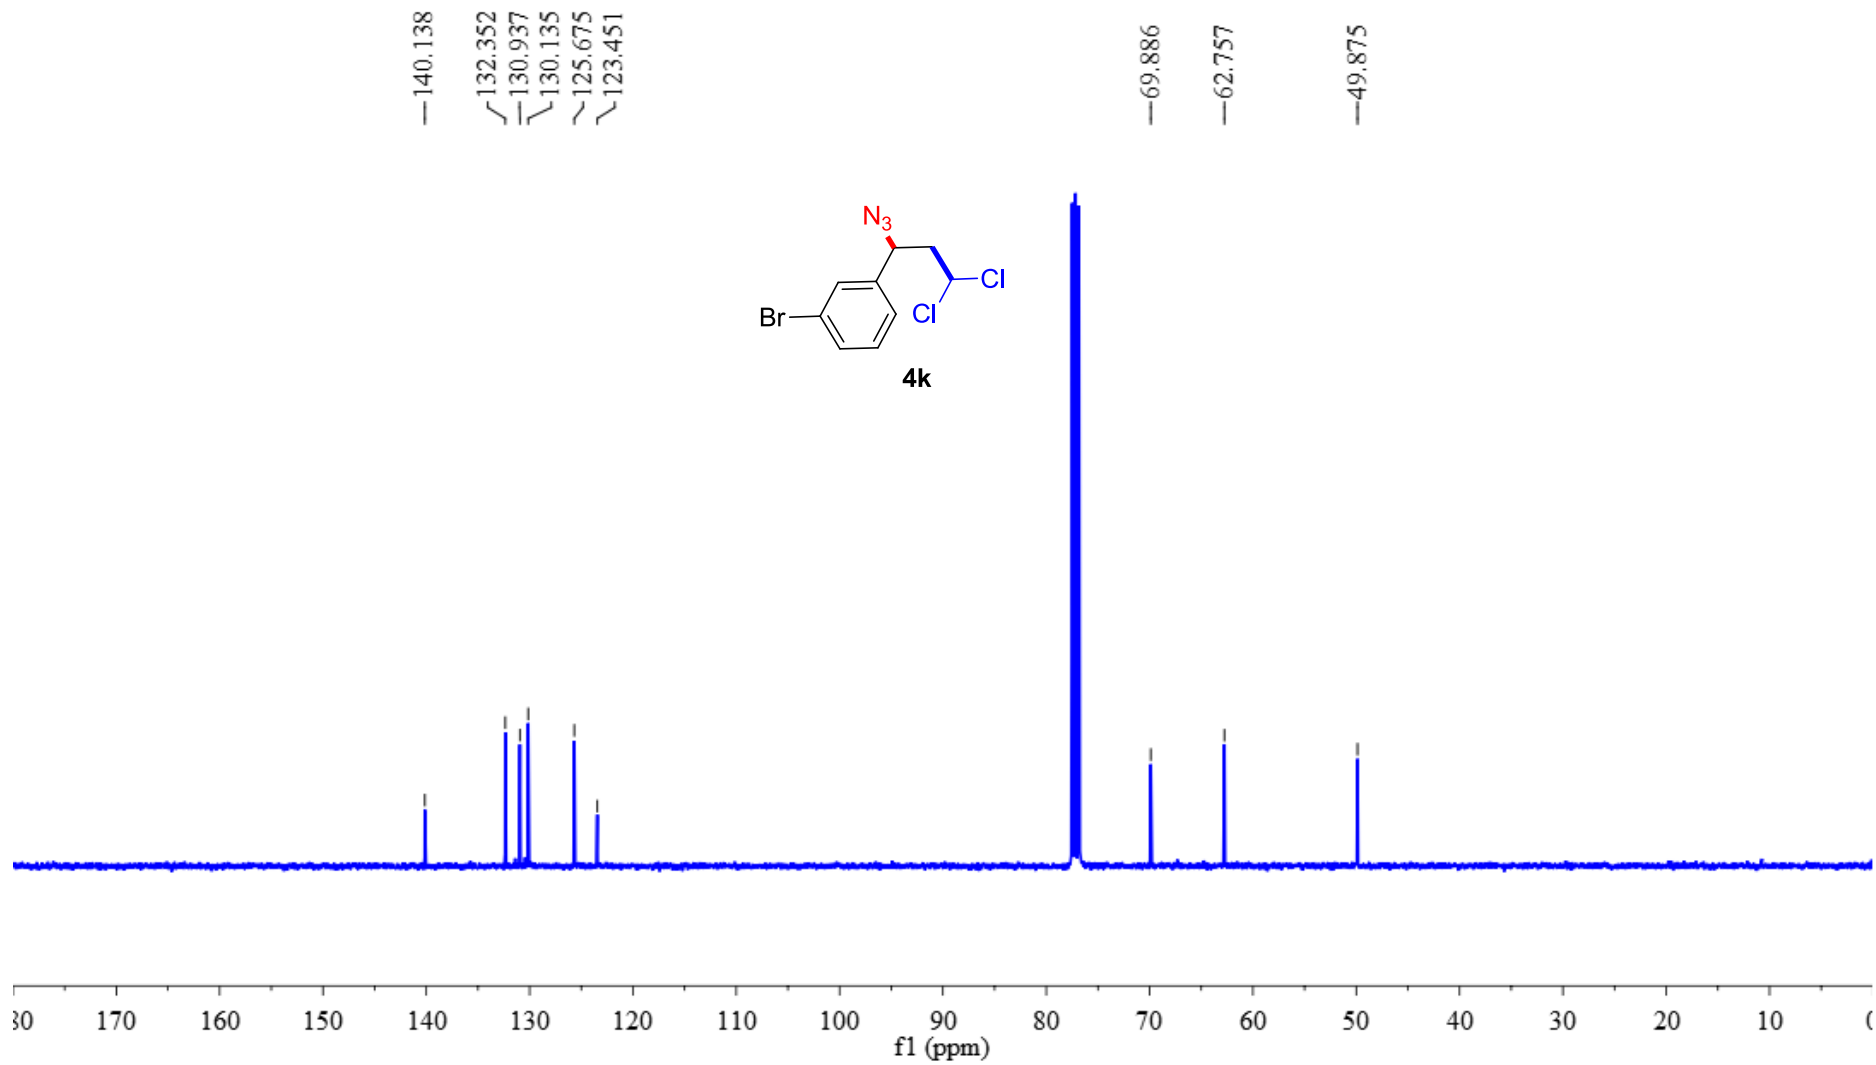

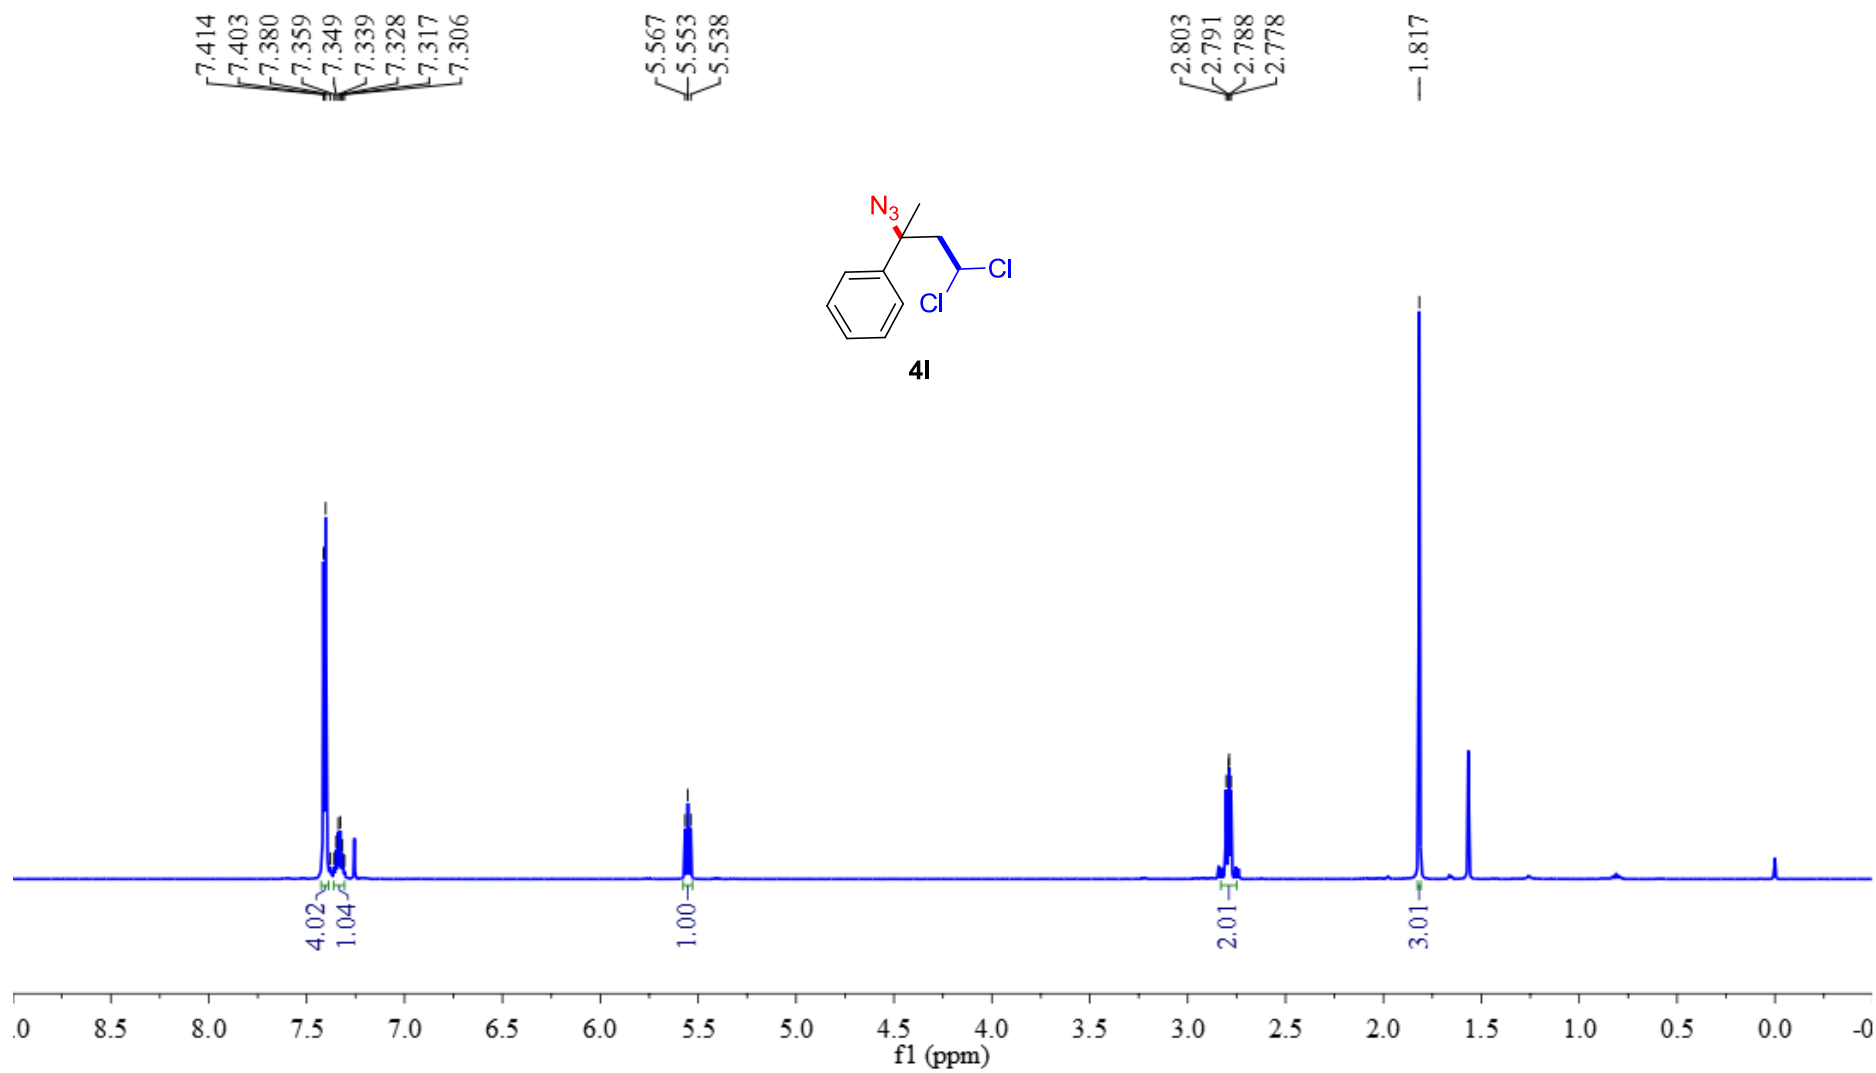



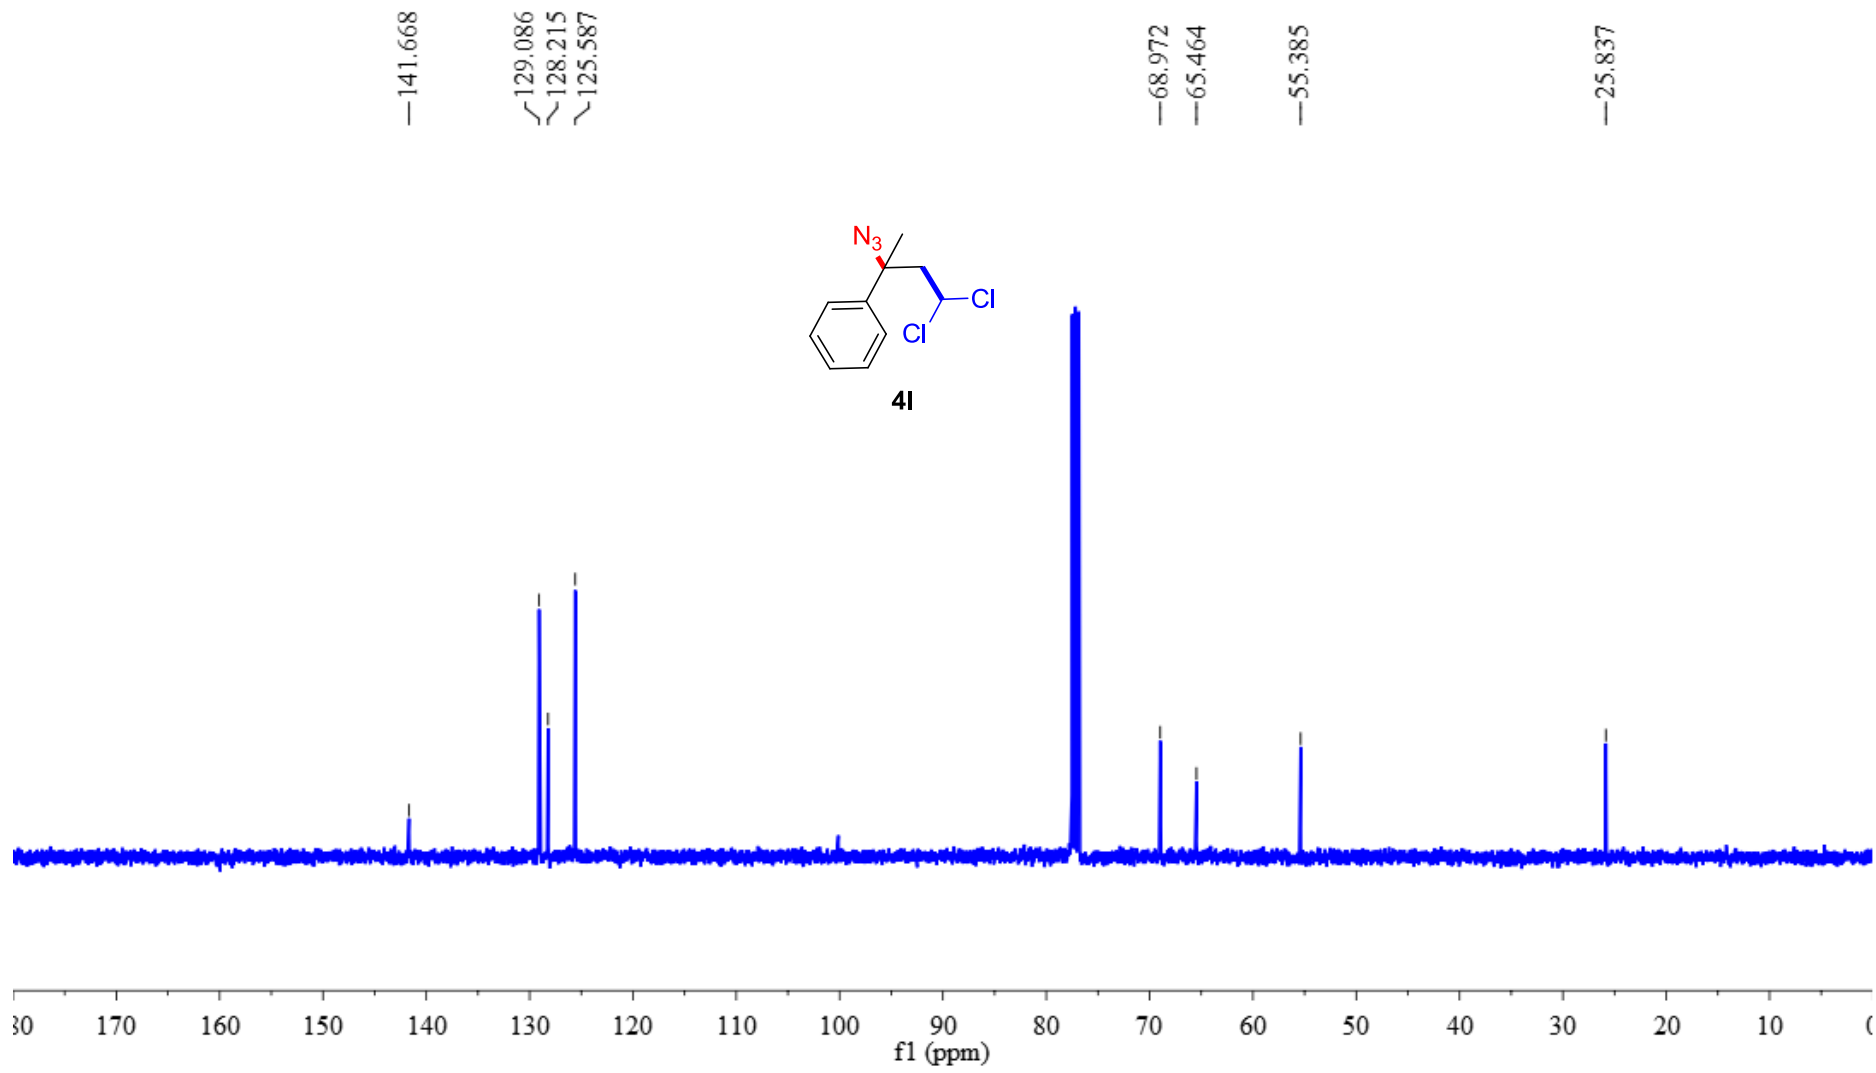

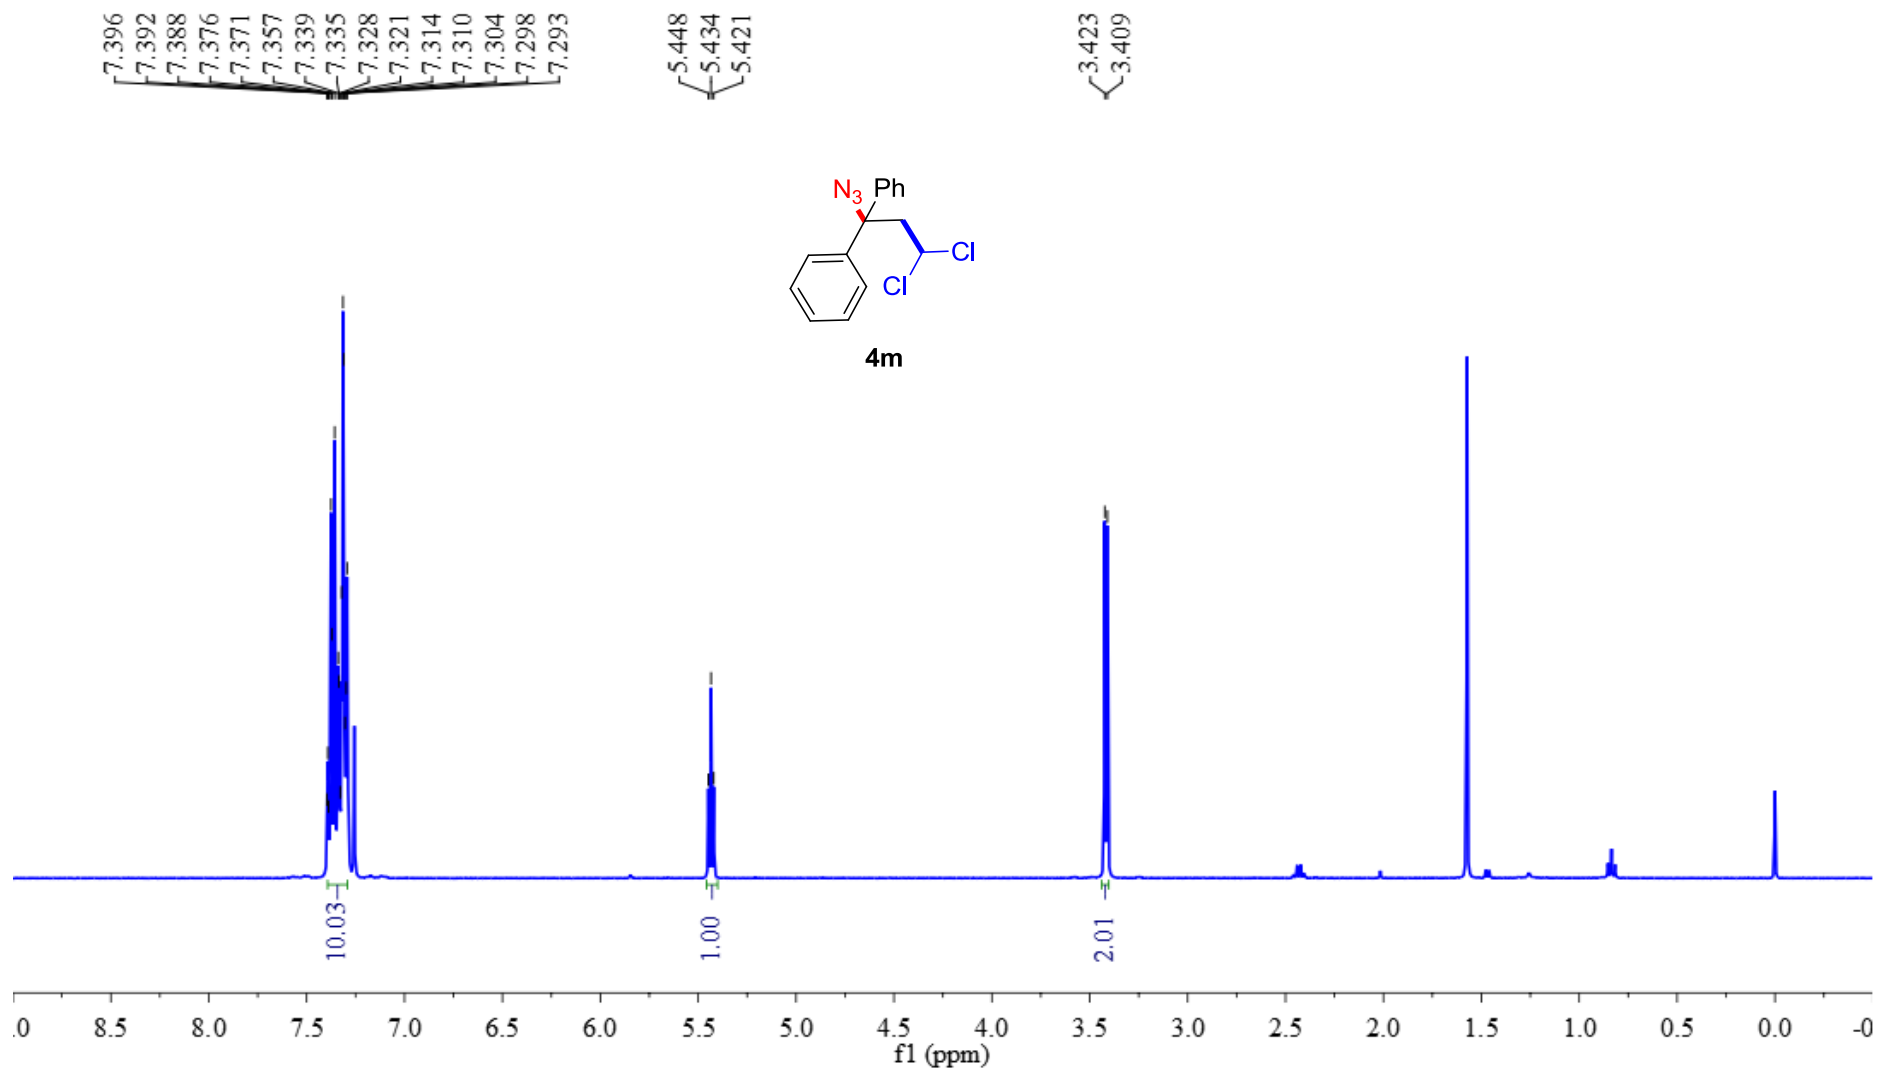

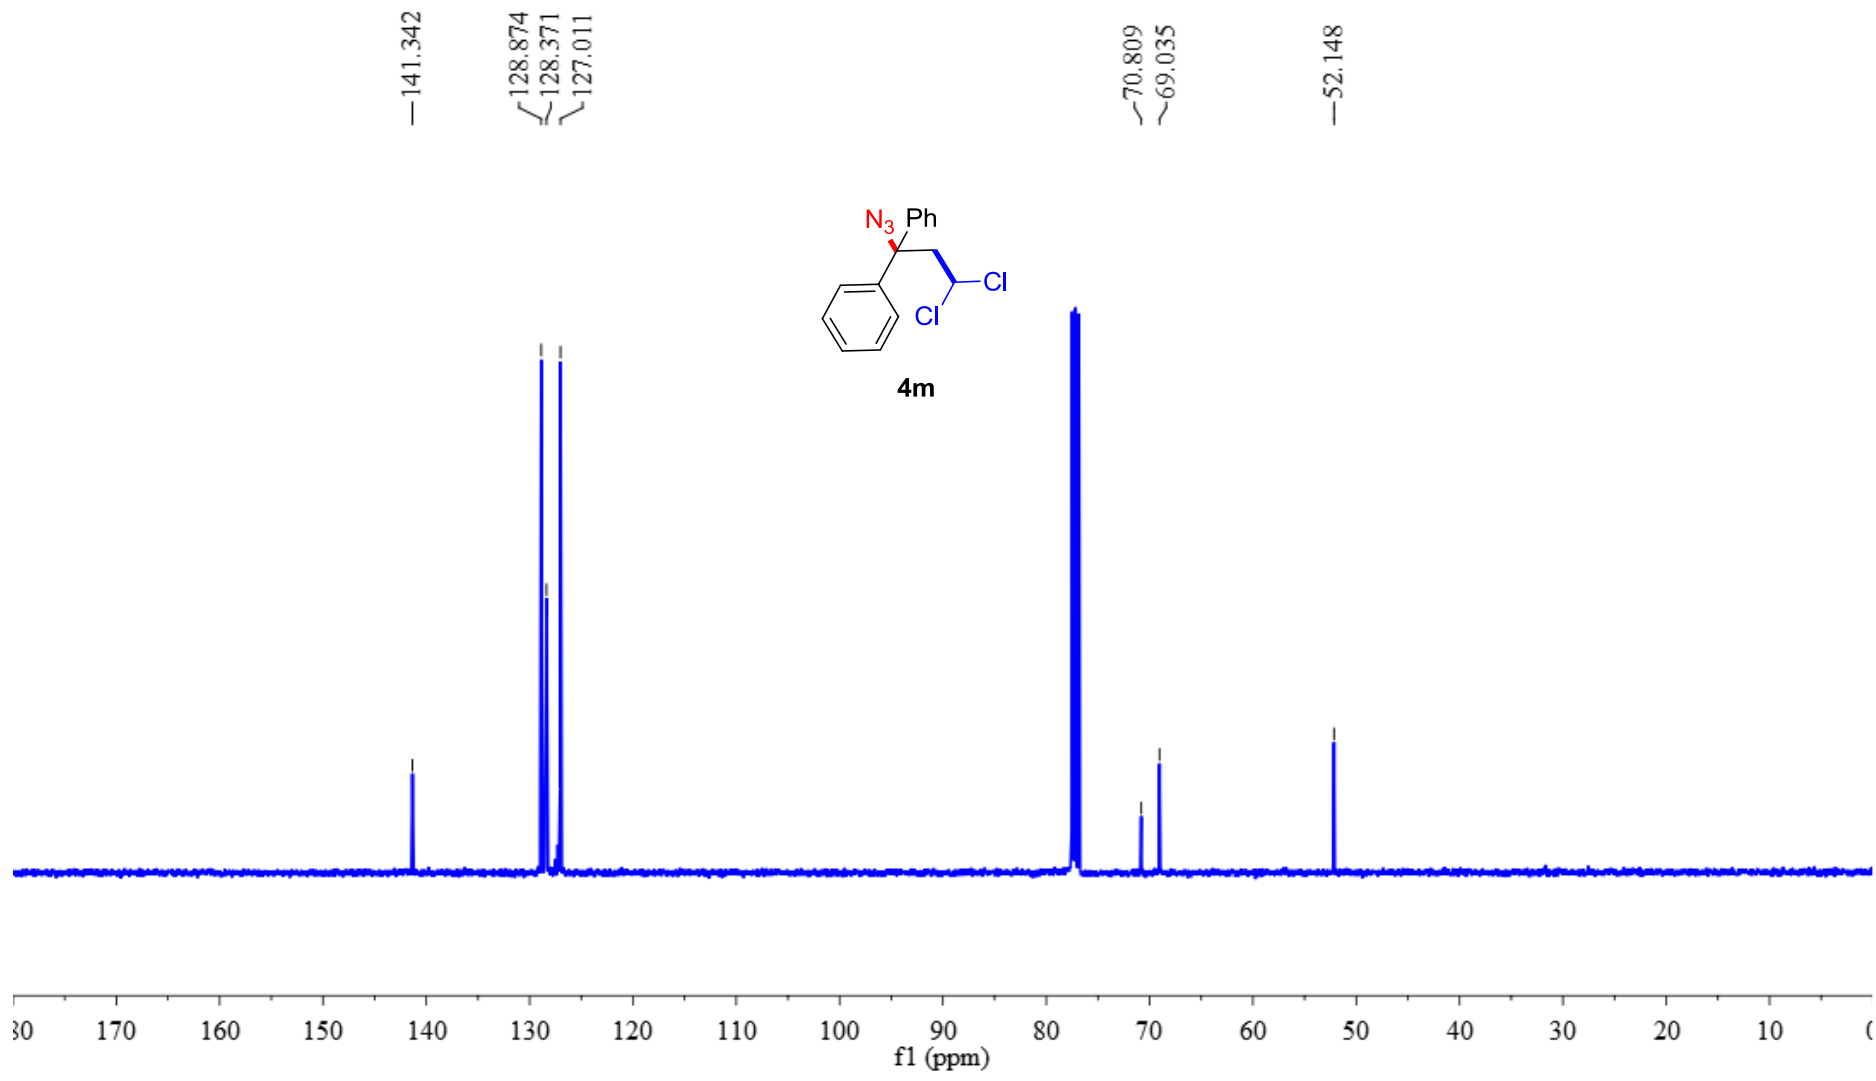

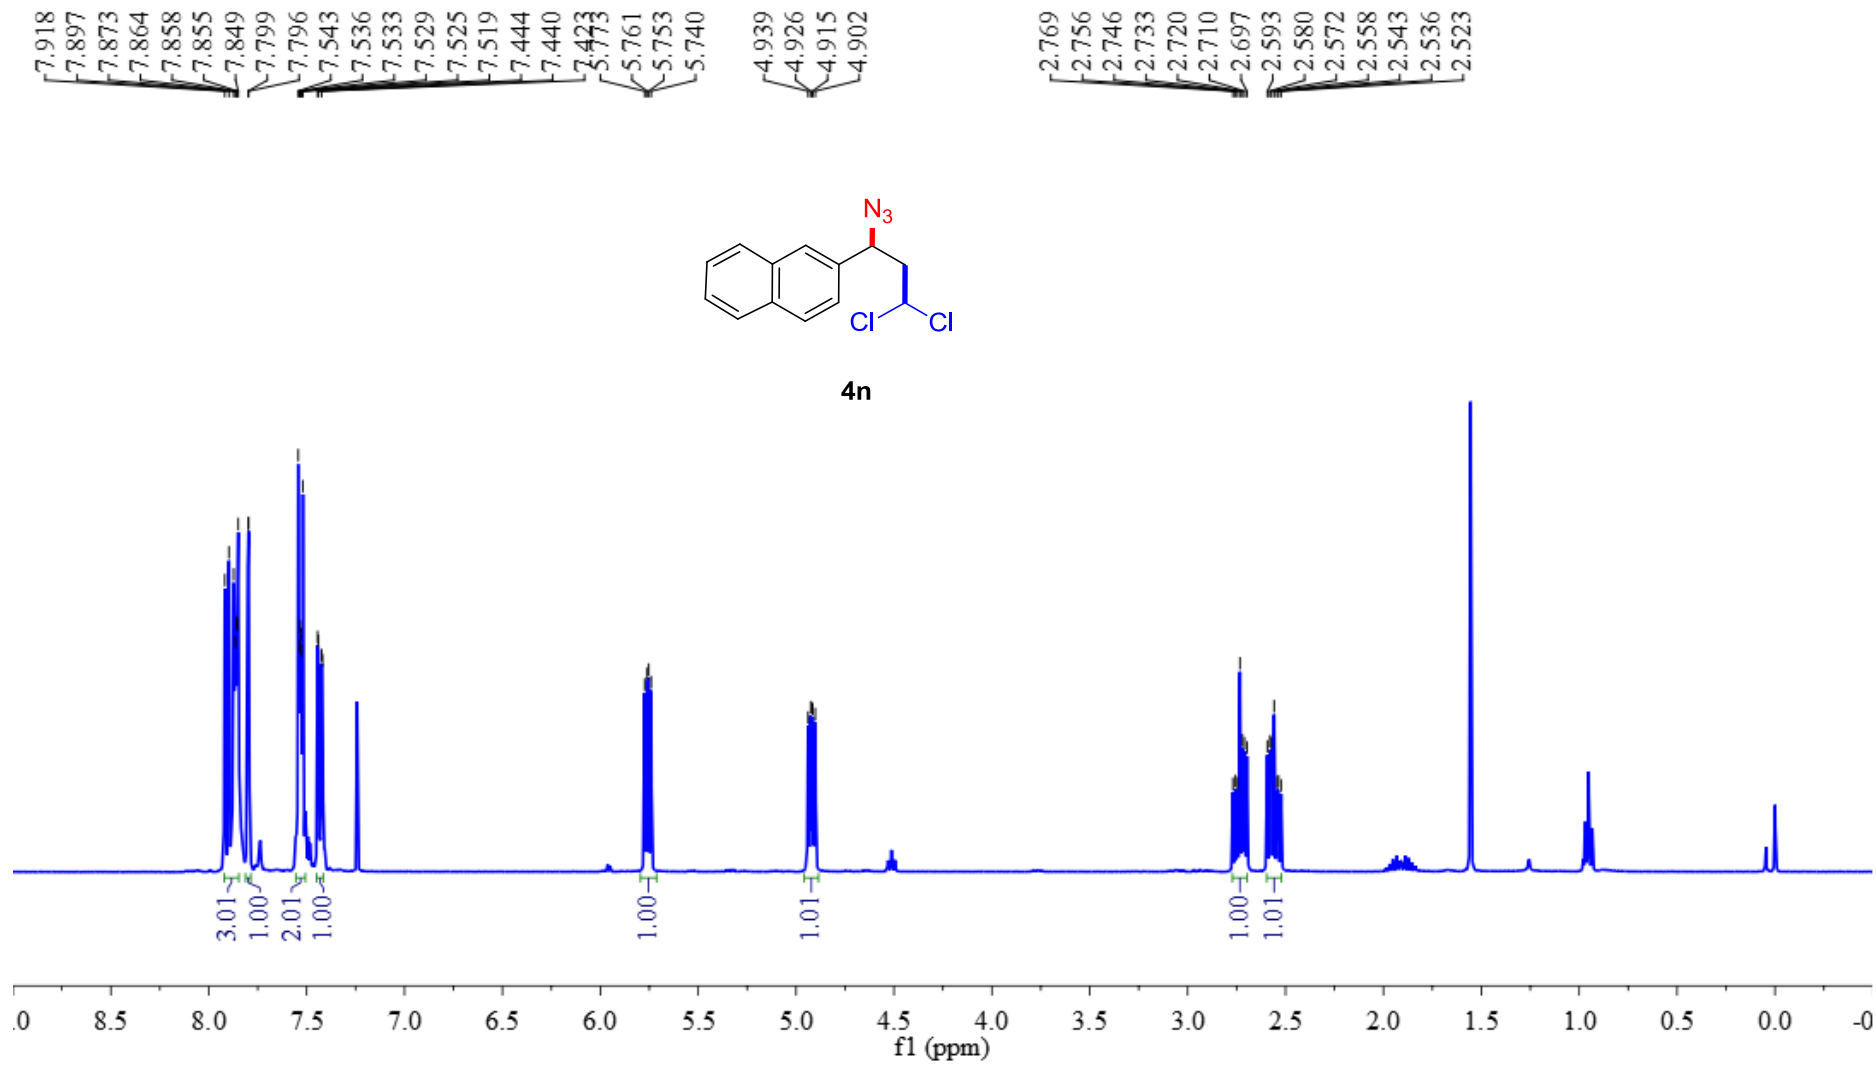

134.895  
133.604  
133.318  
129.553  
128.211  
127.955  
126.935  
126.908  
126.712  
124.060

—70.199  
—63.551  
—49.775

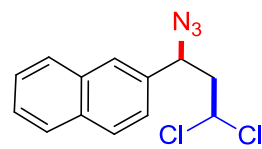

4n

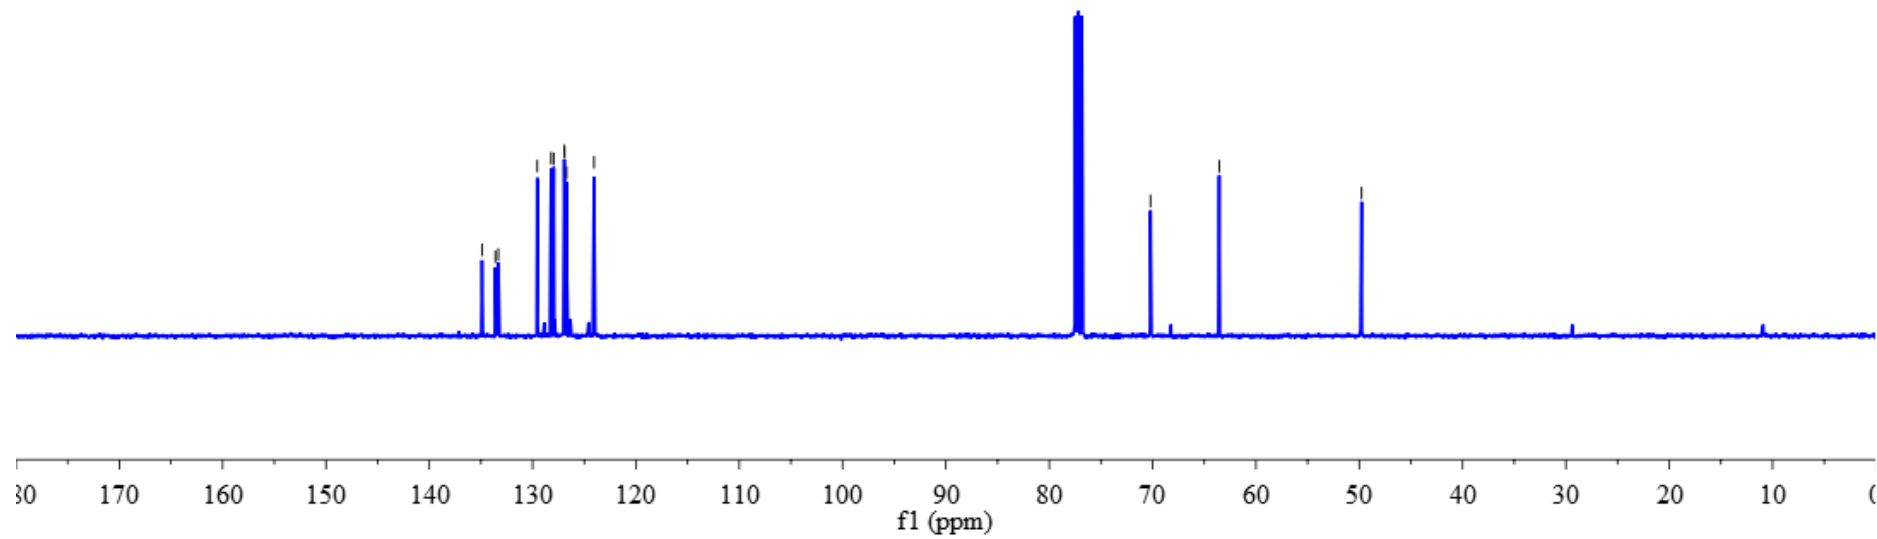

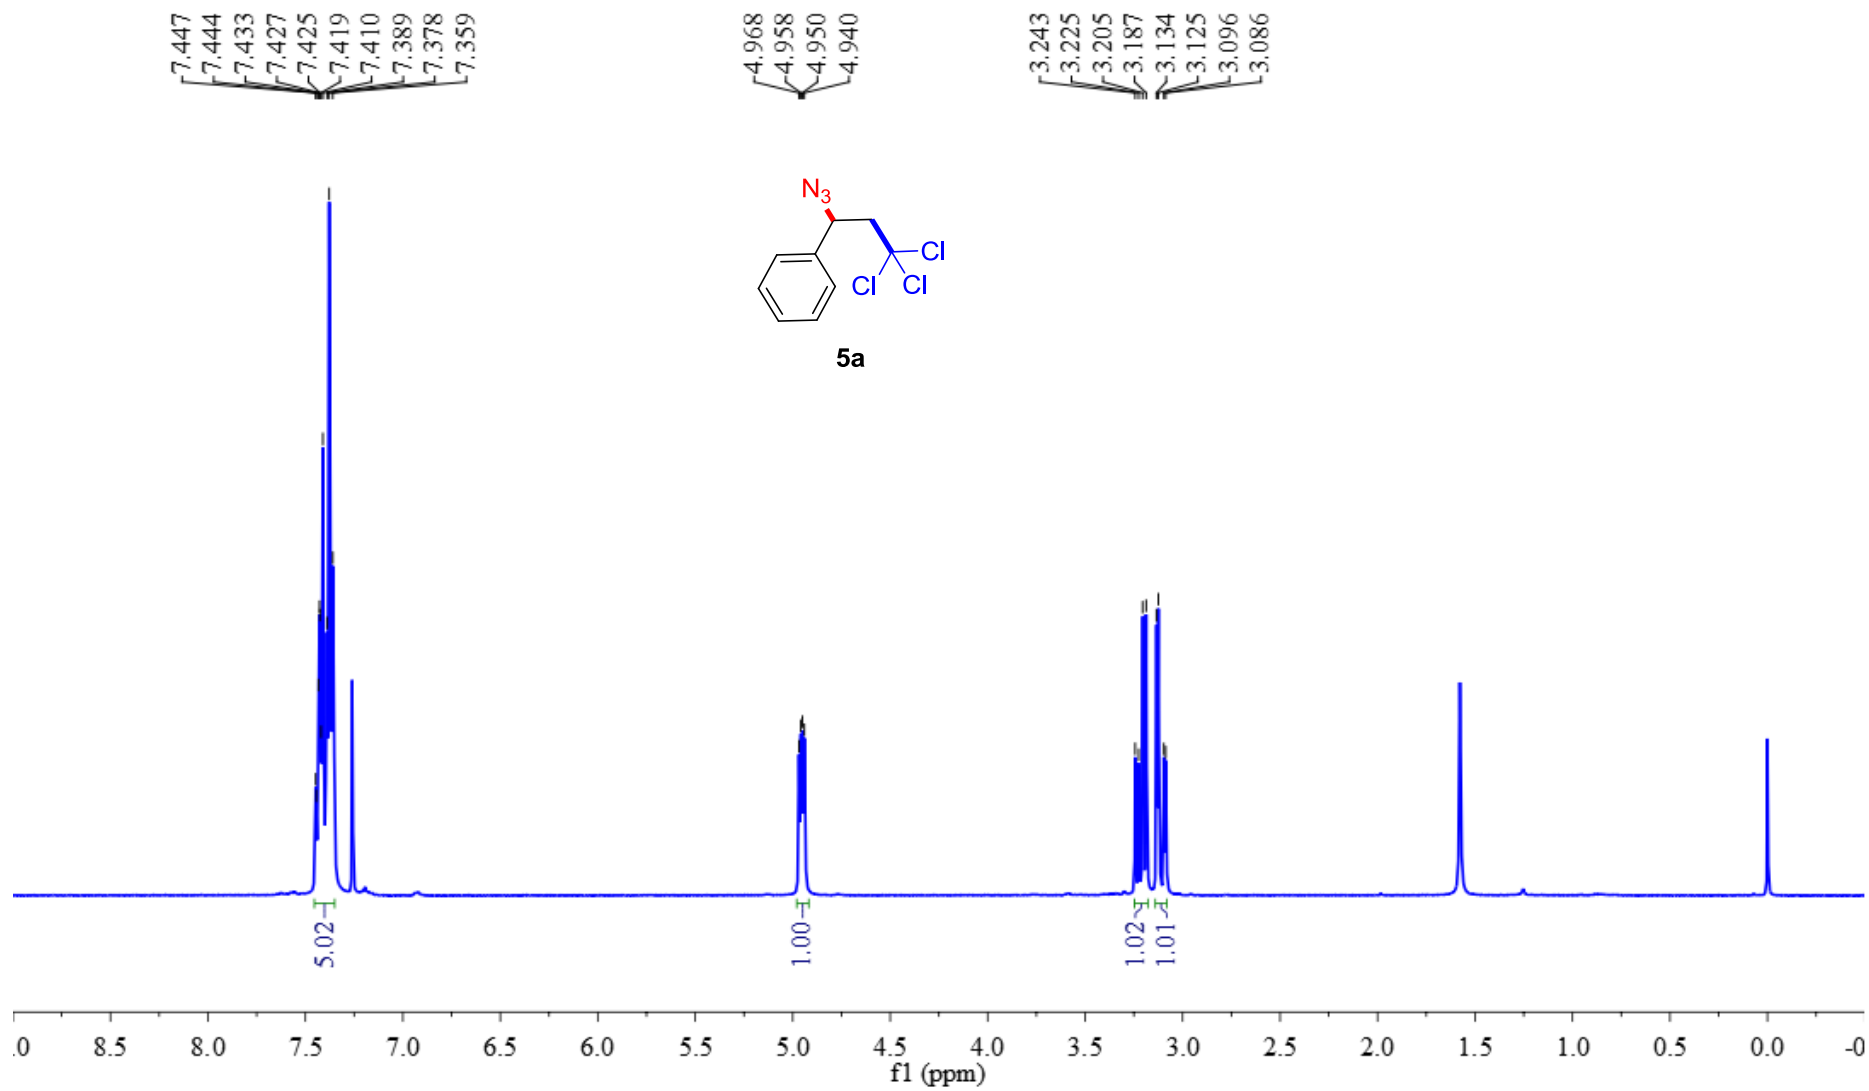

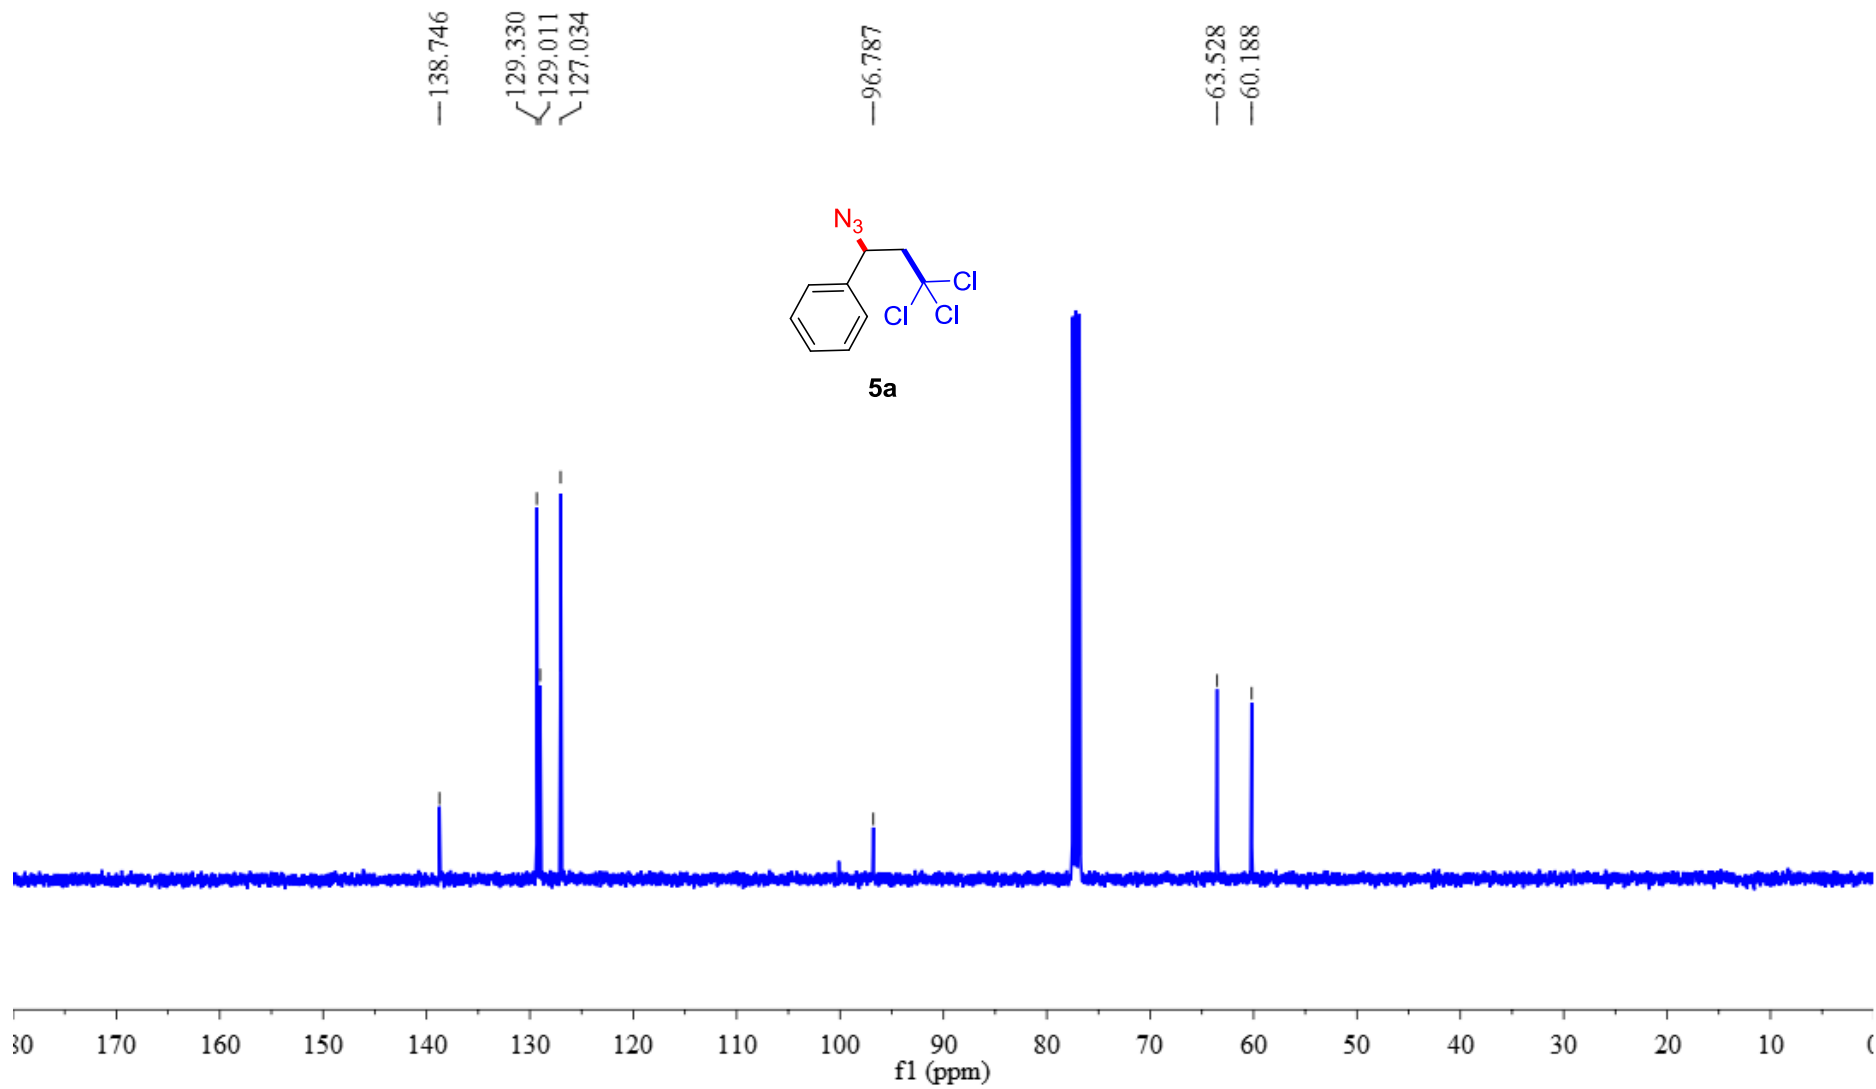

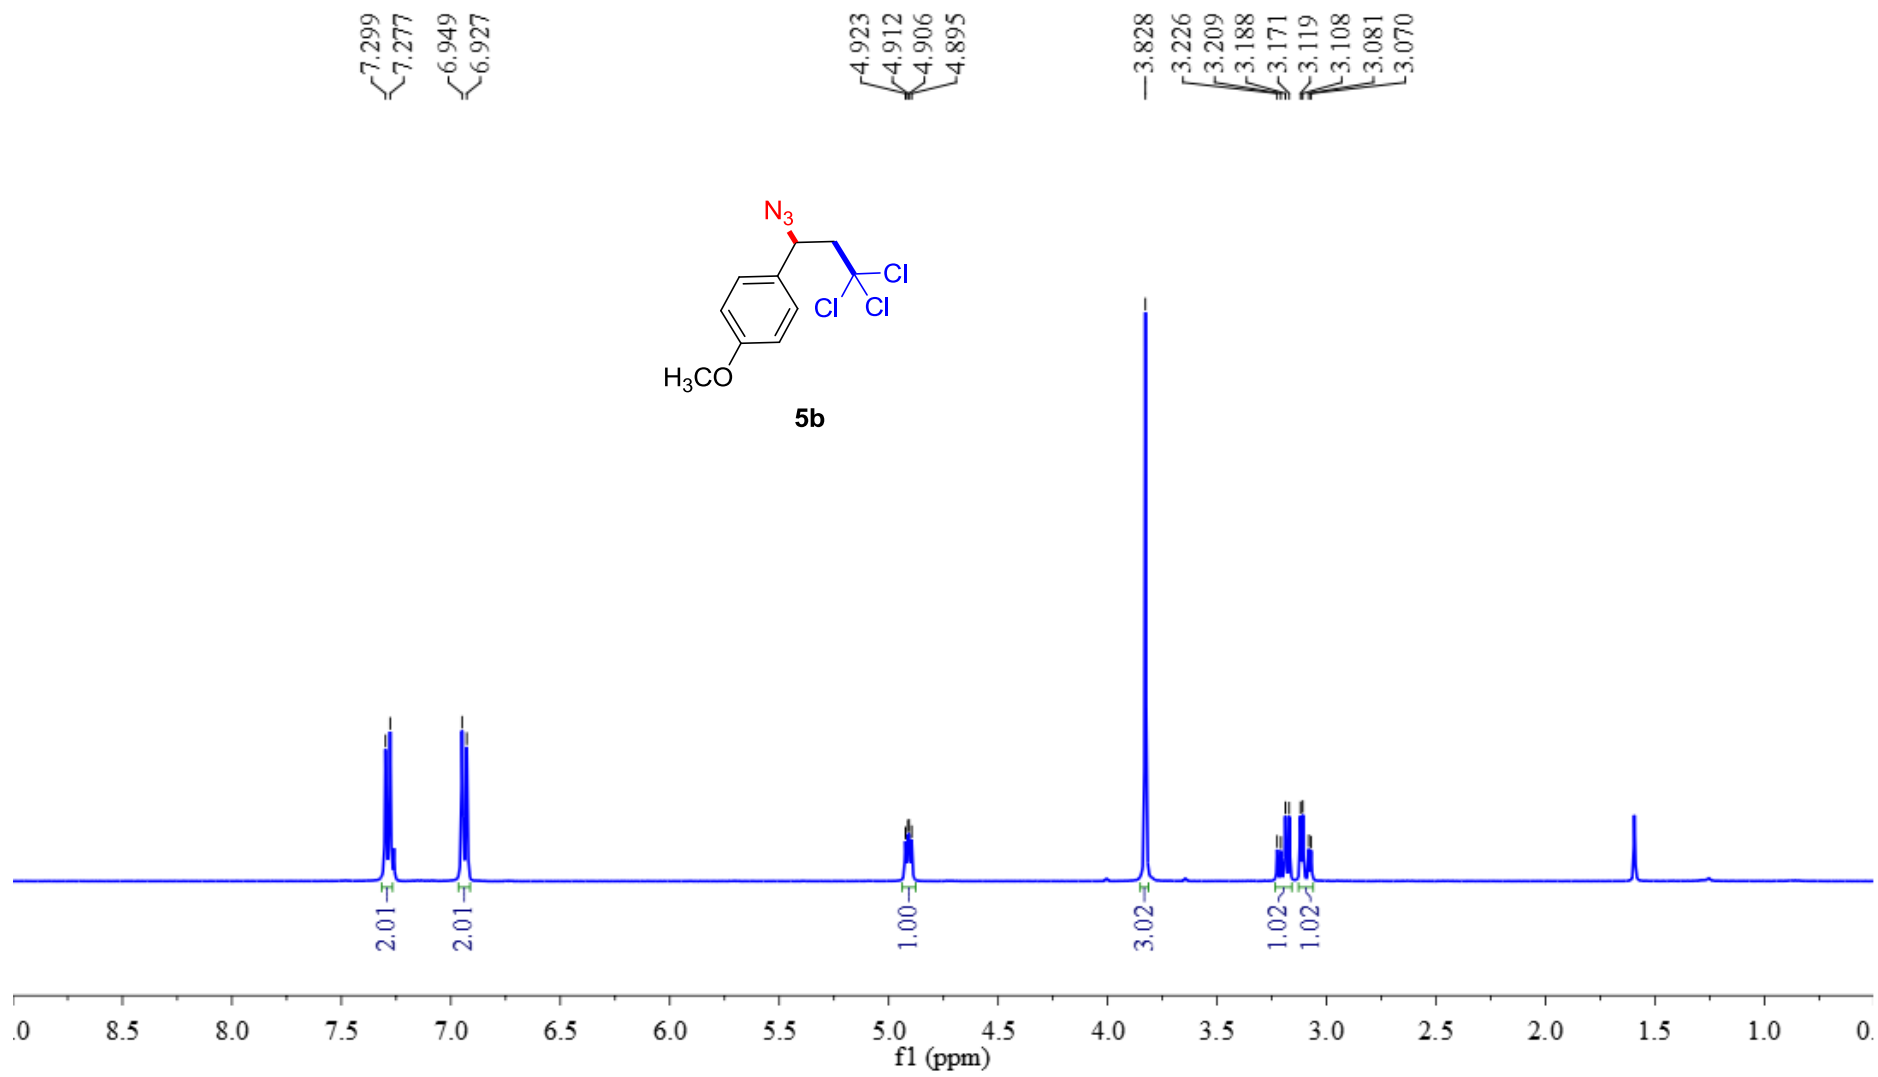



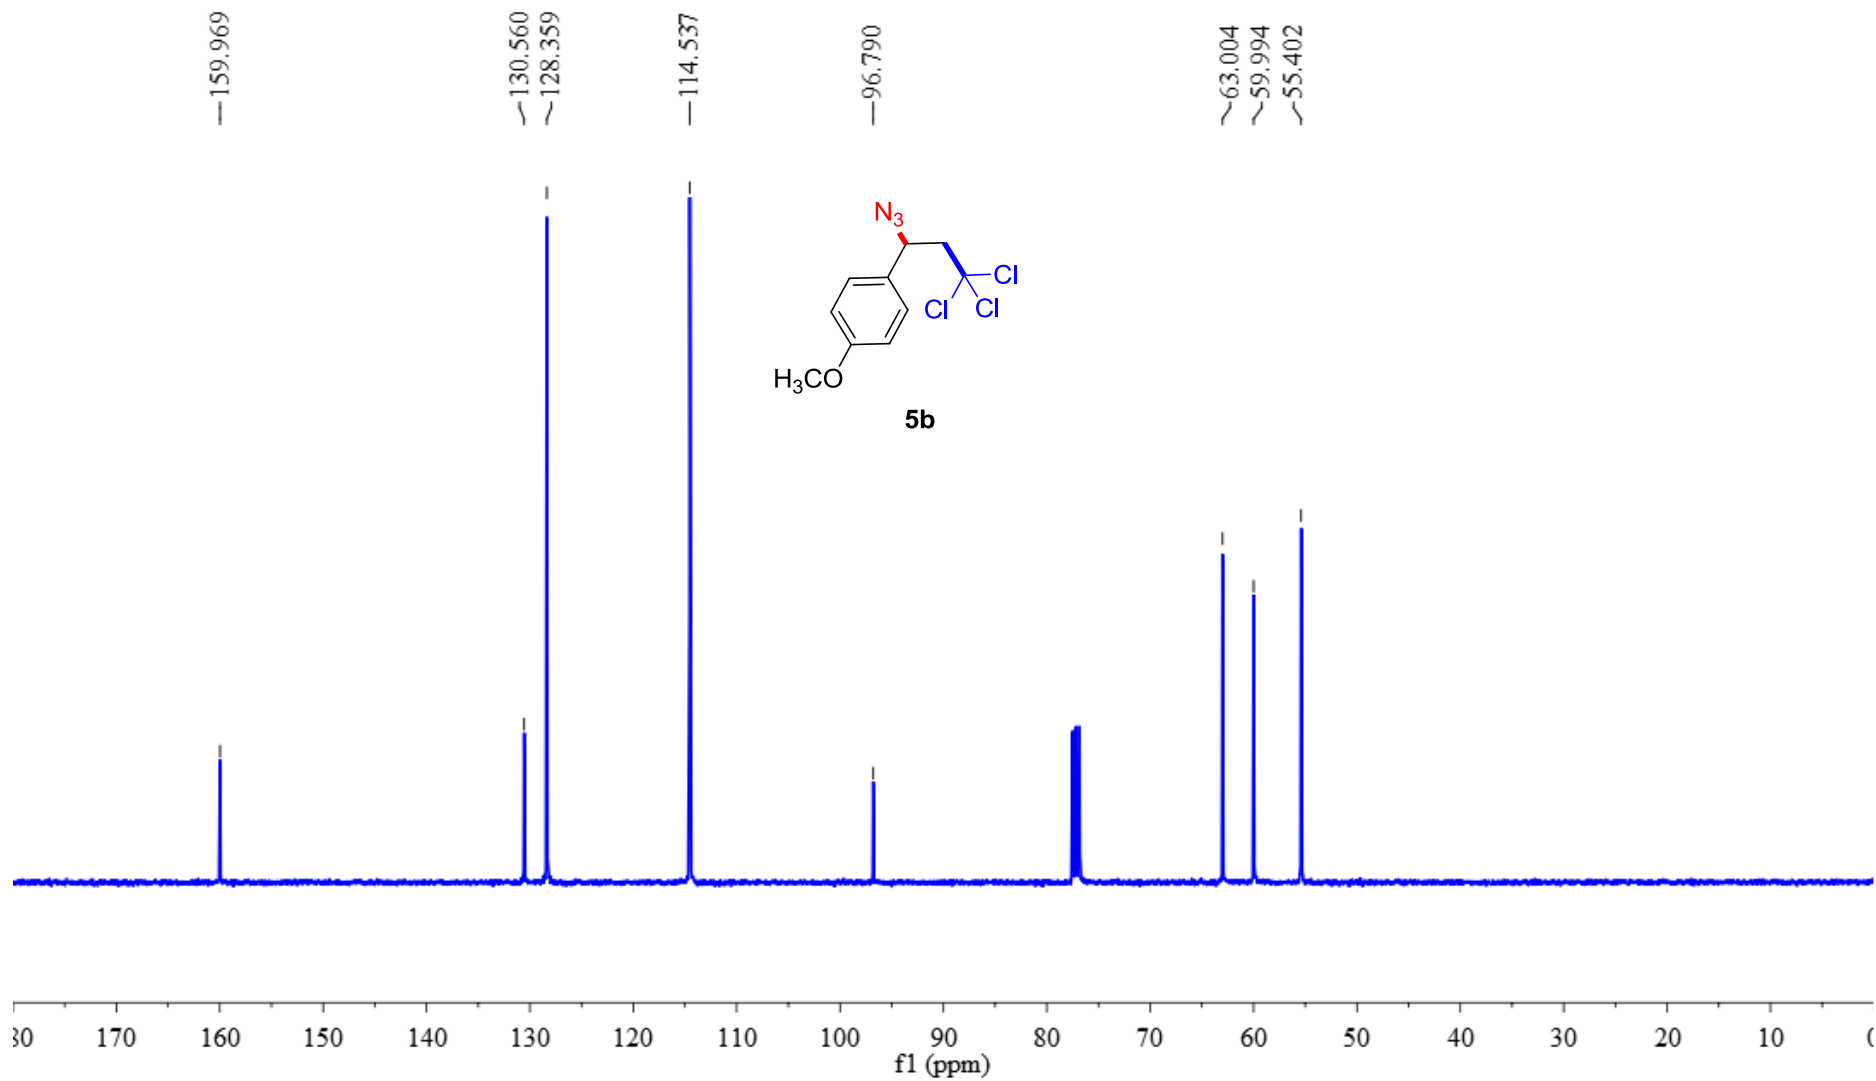

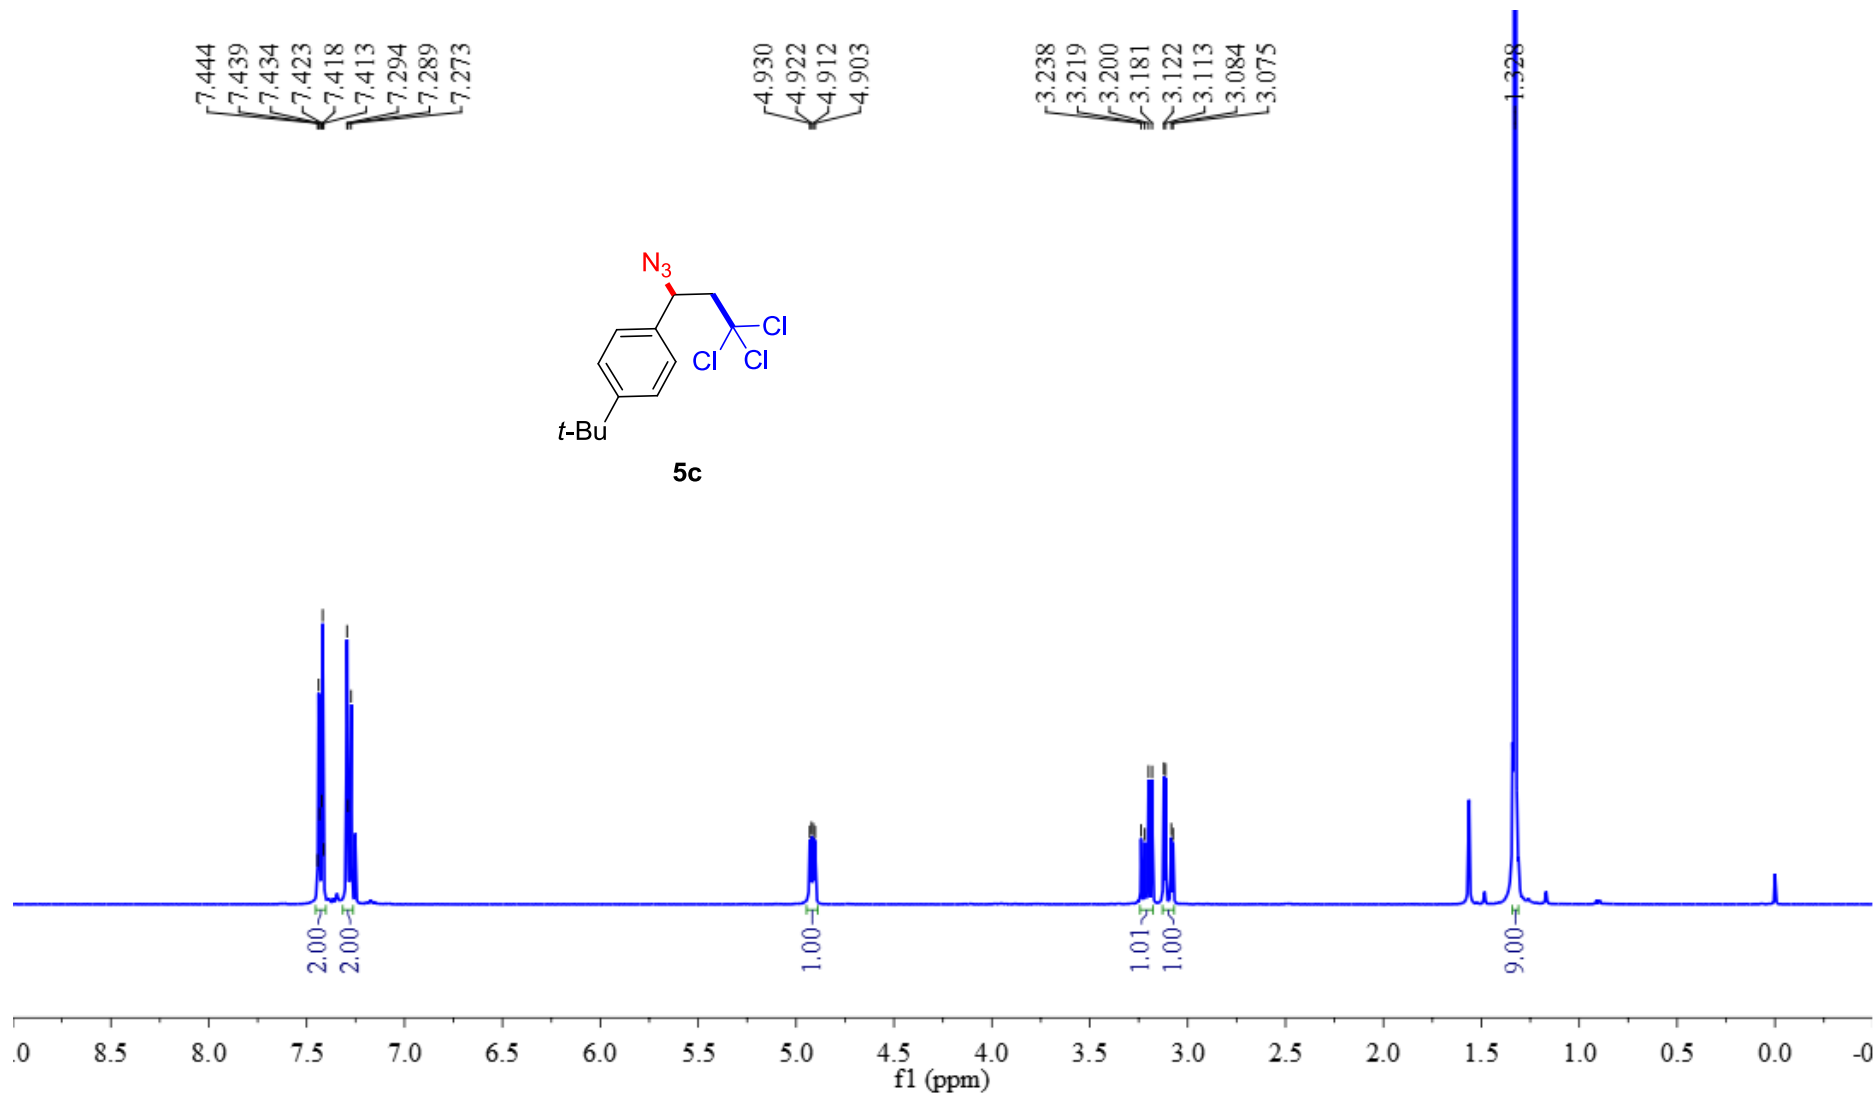

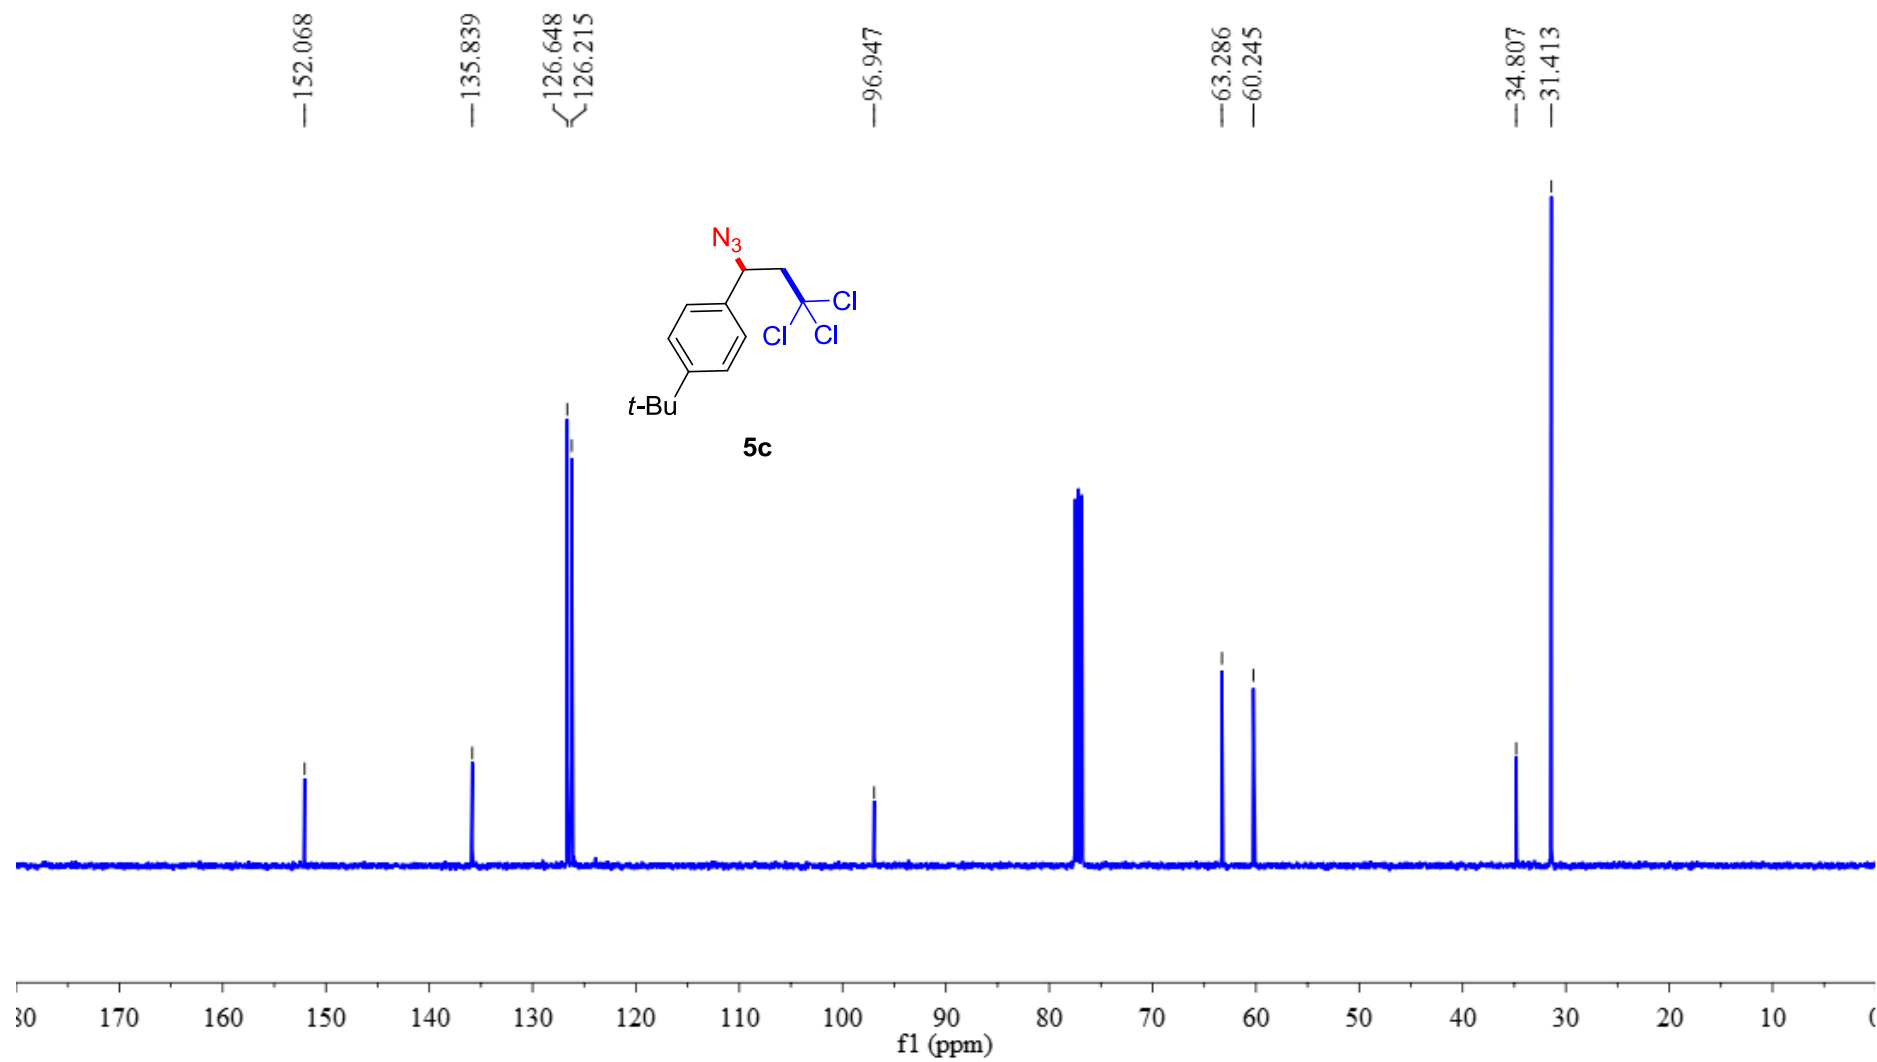

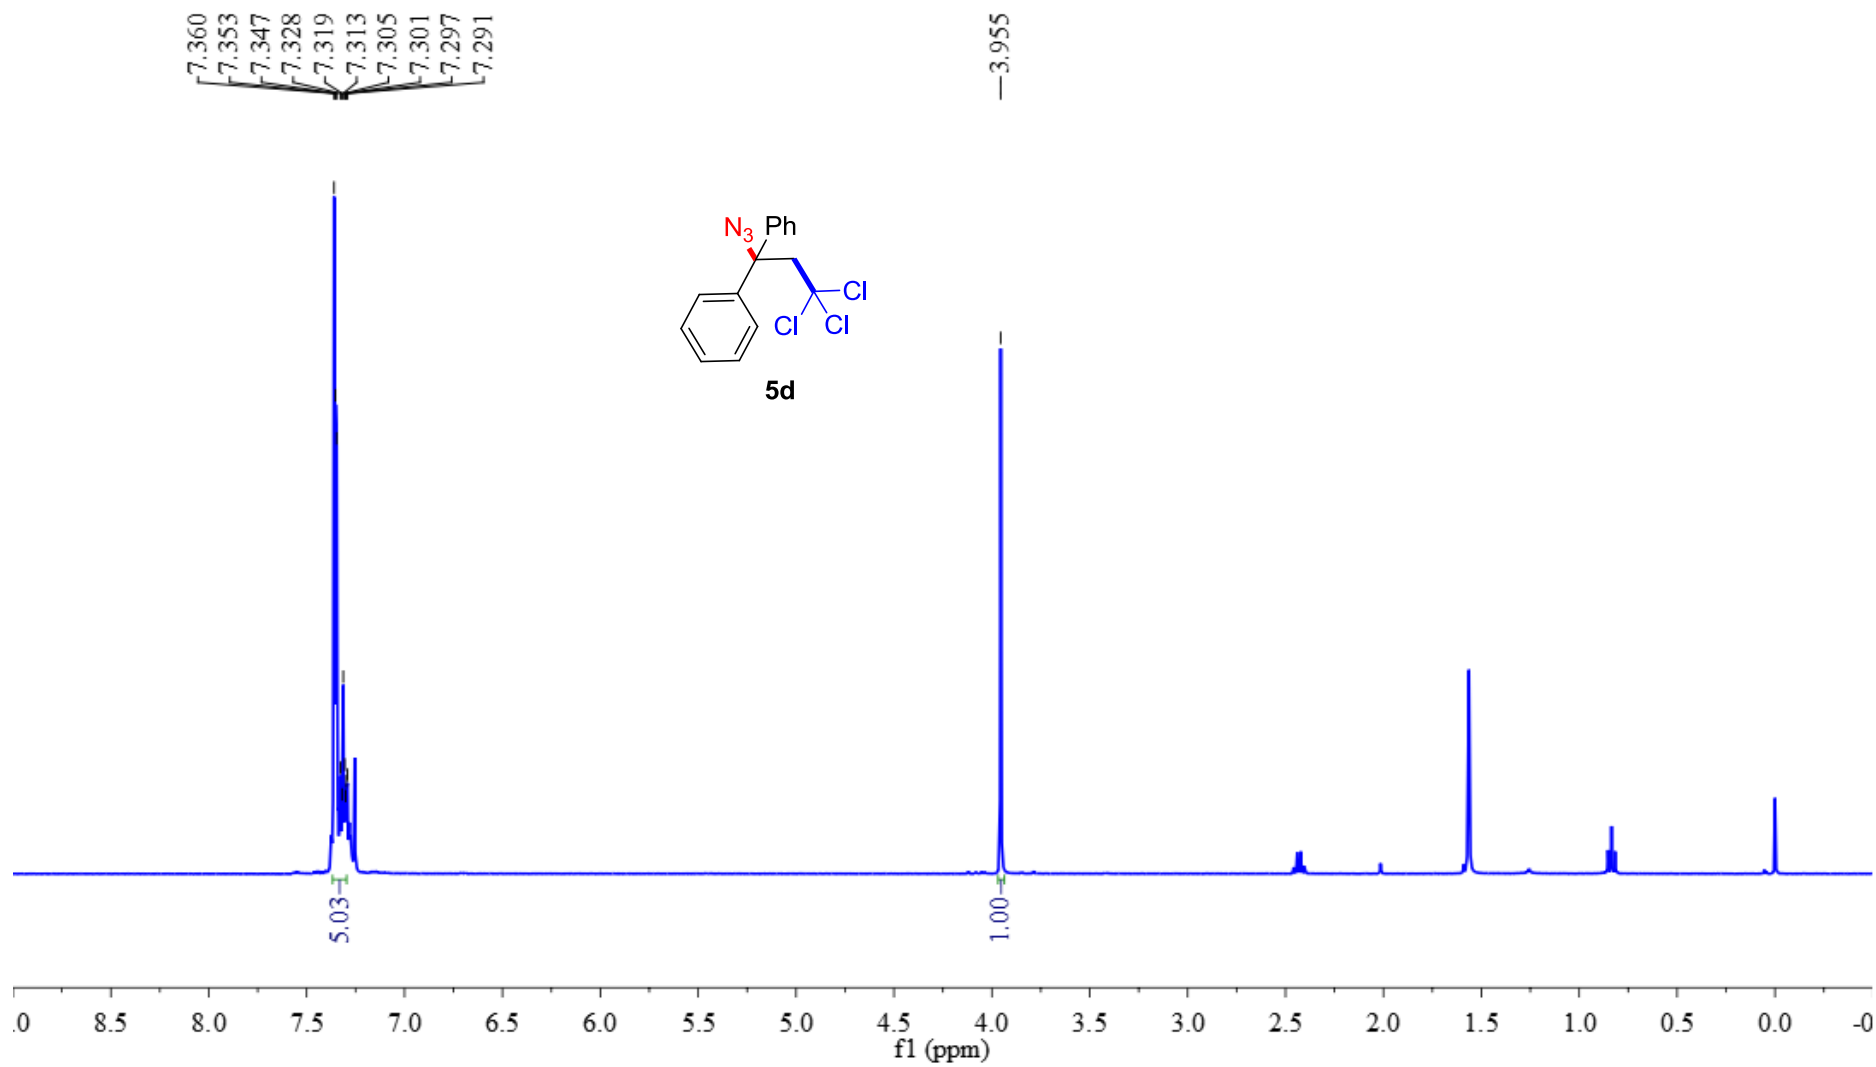

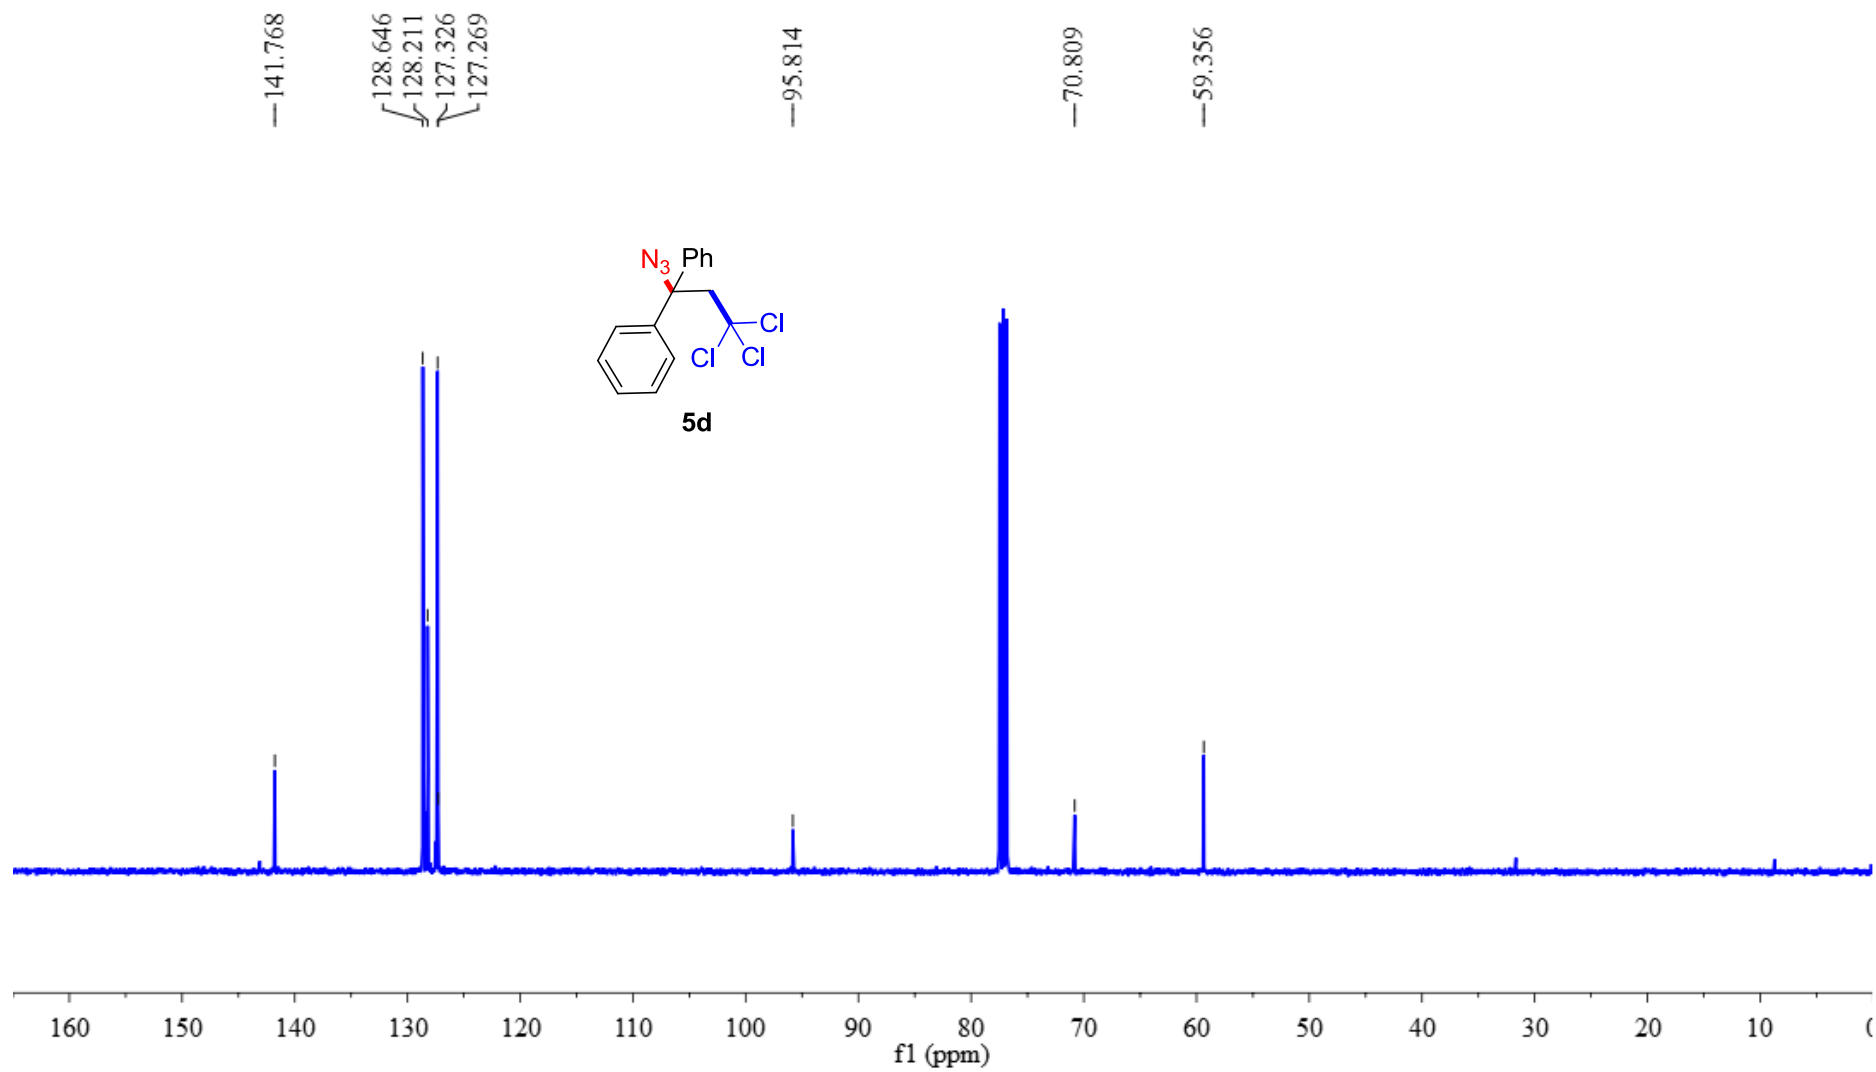

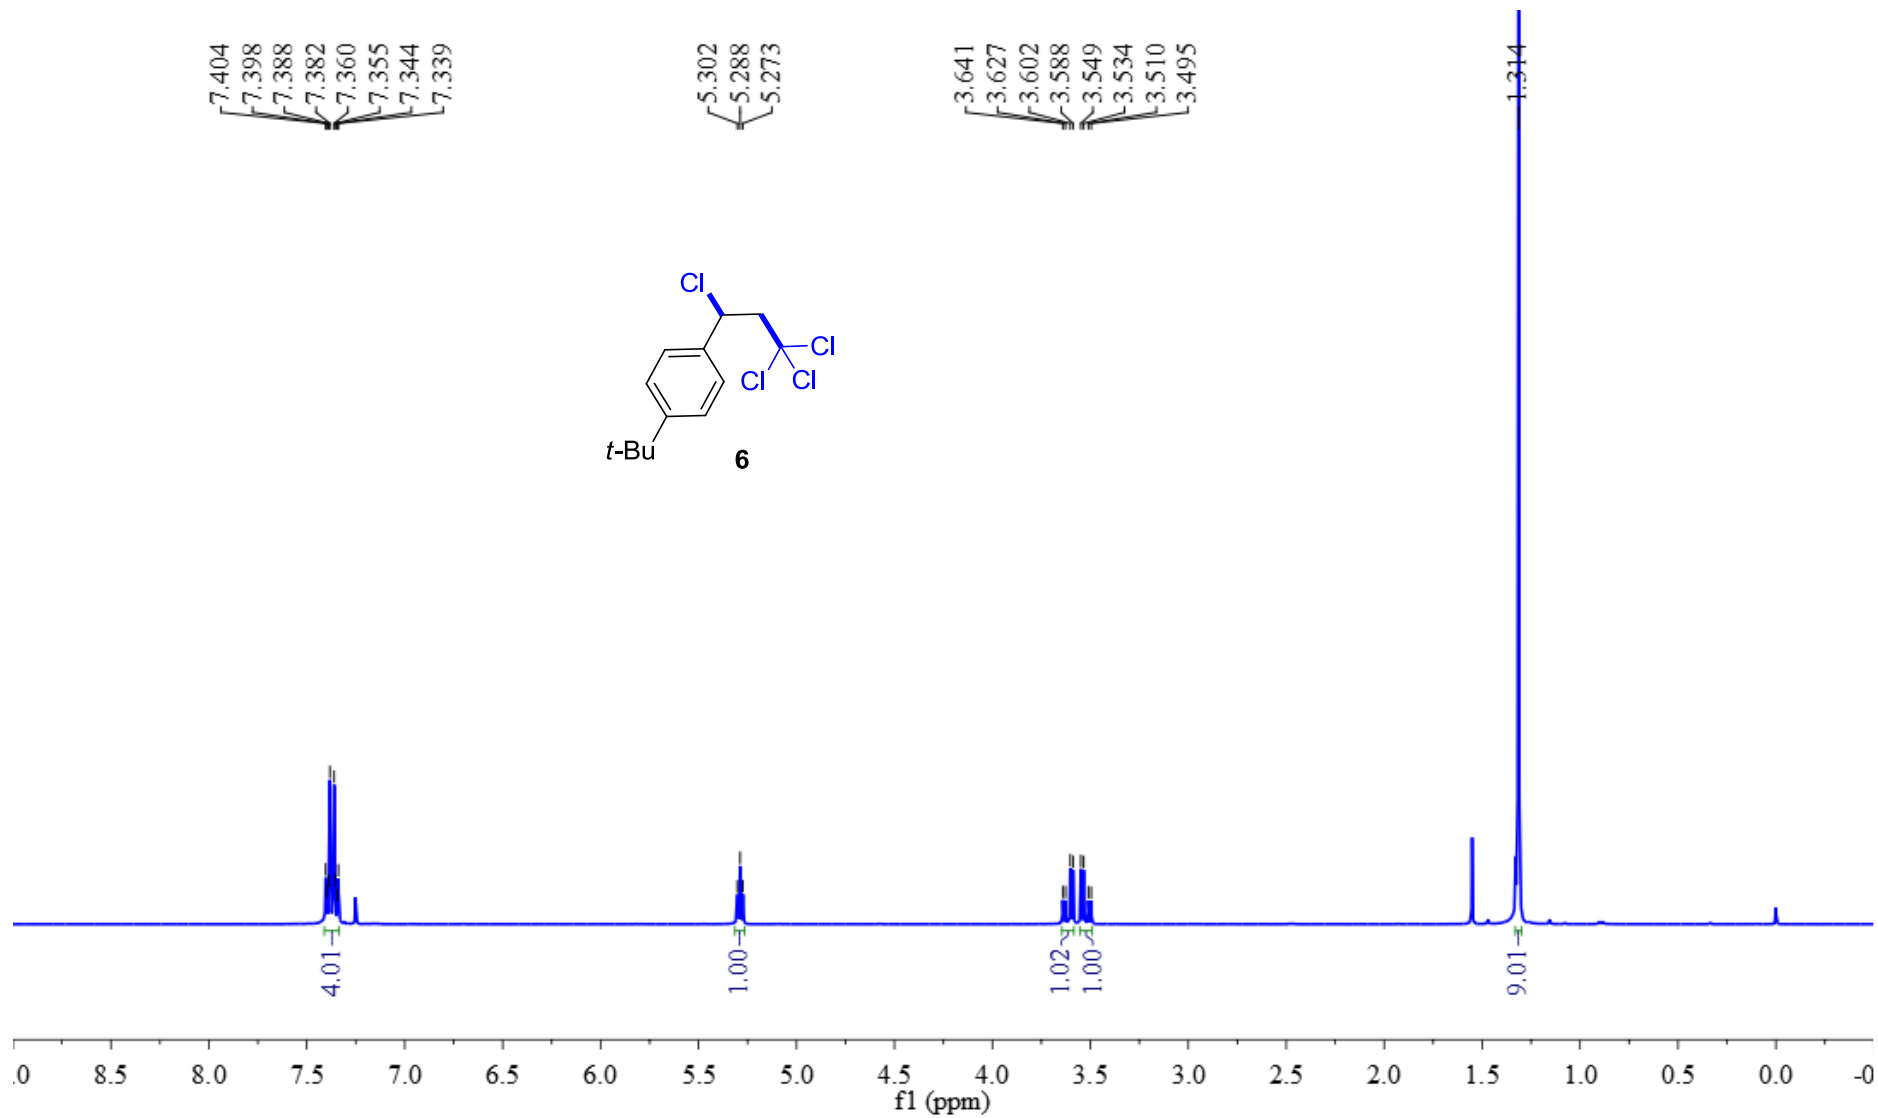

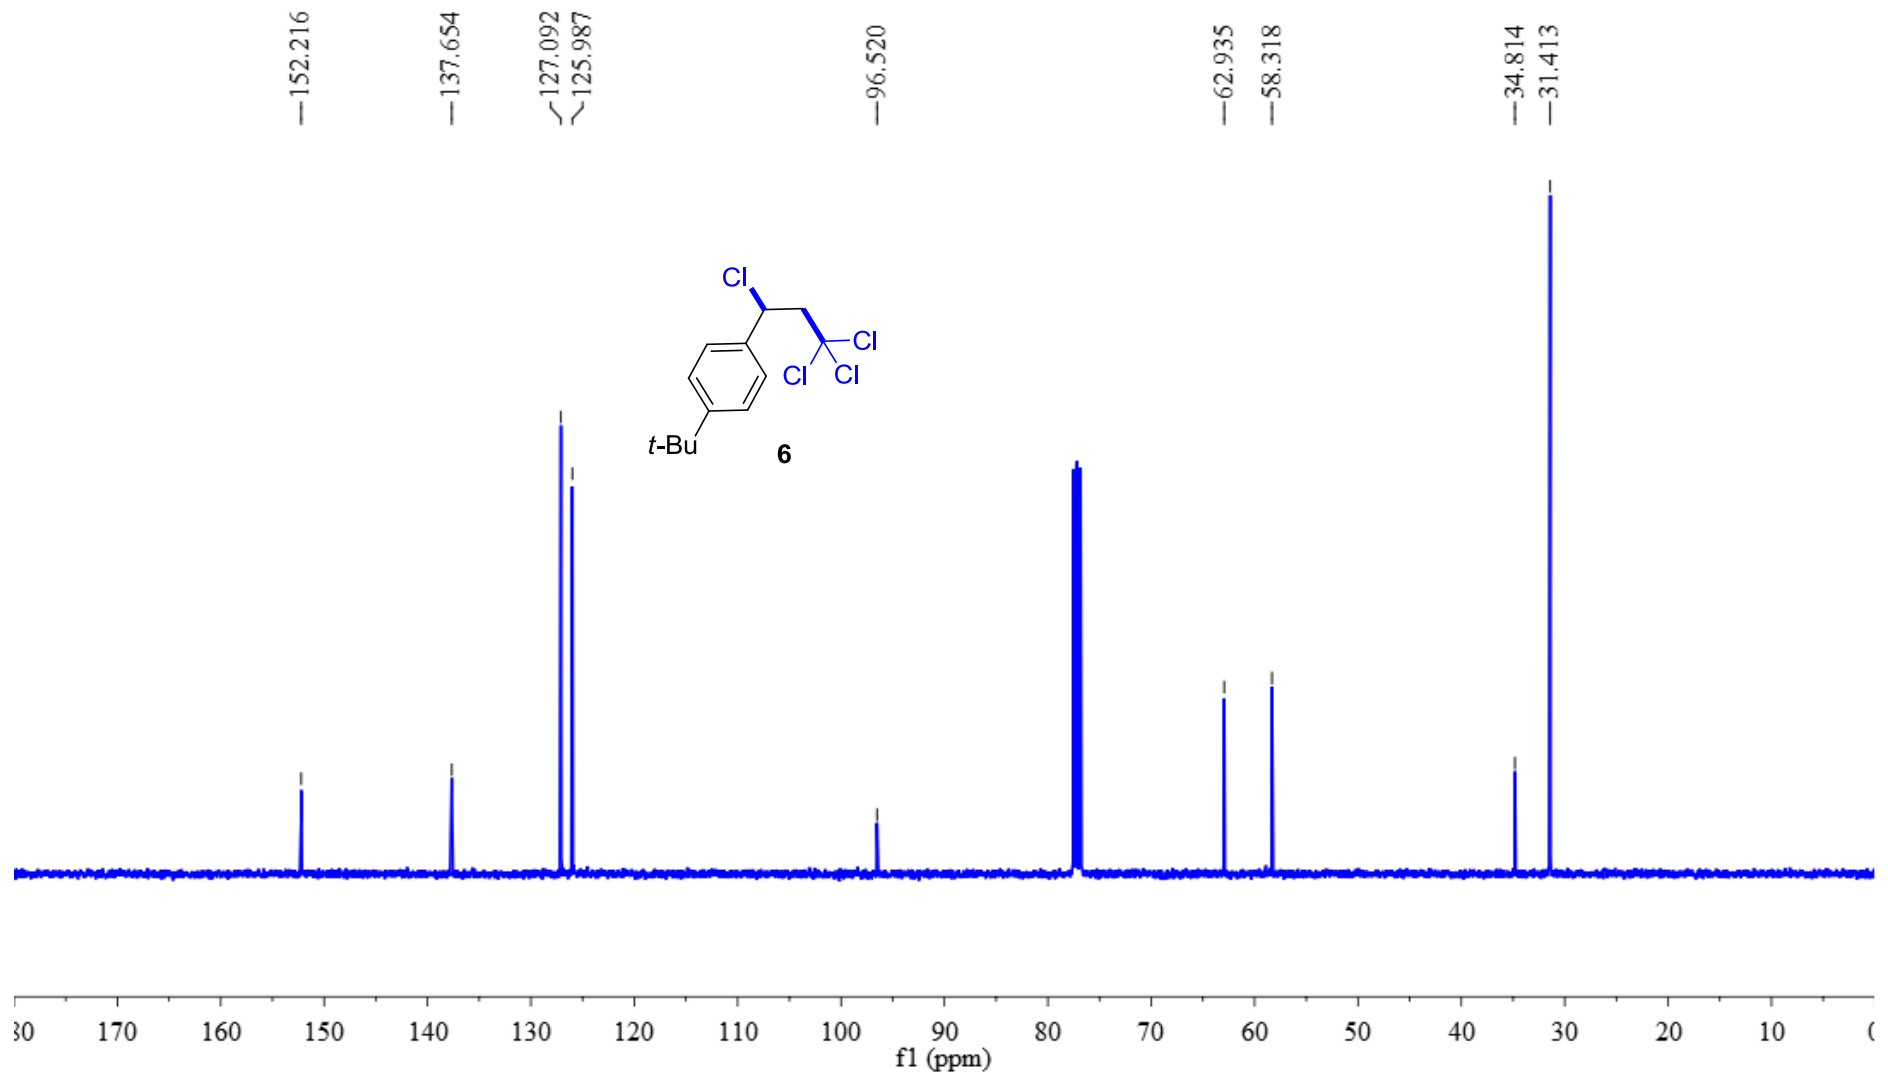

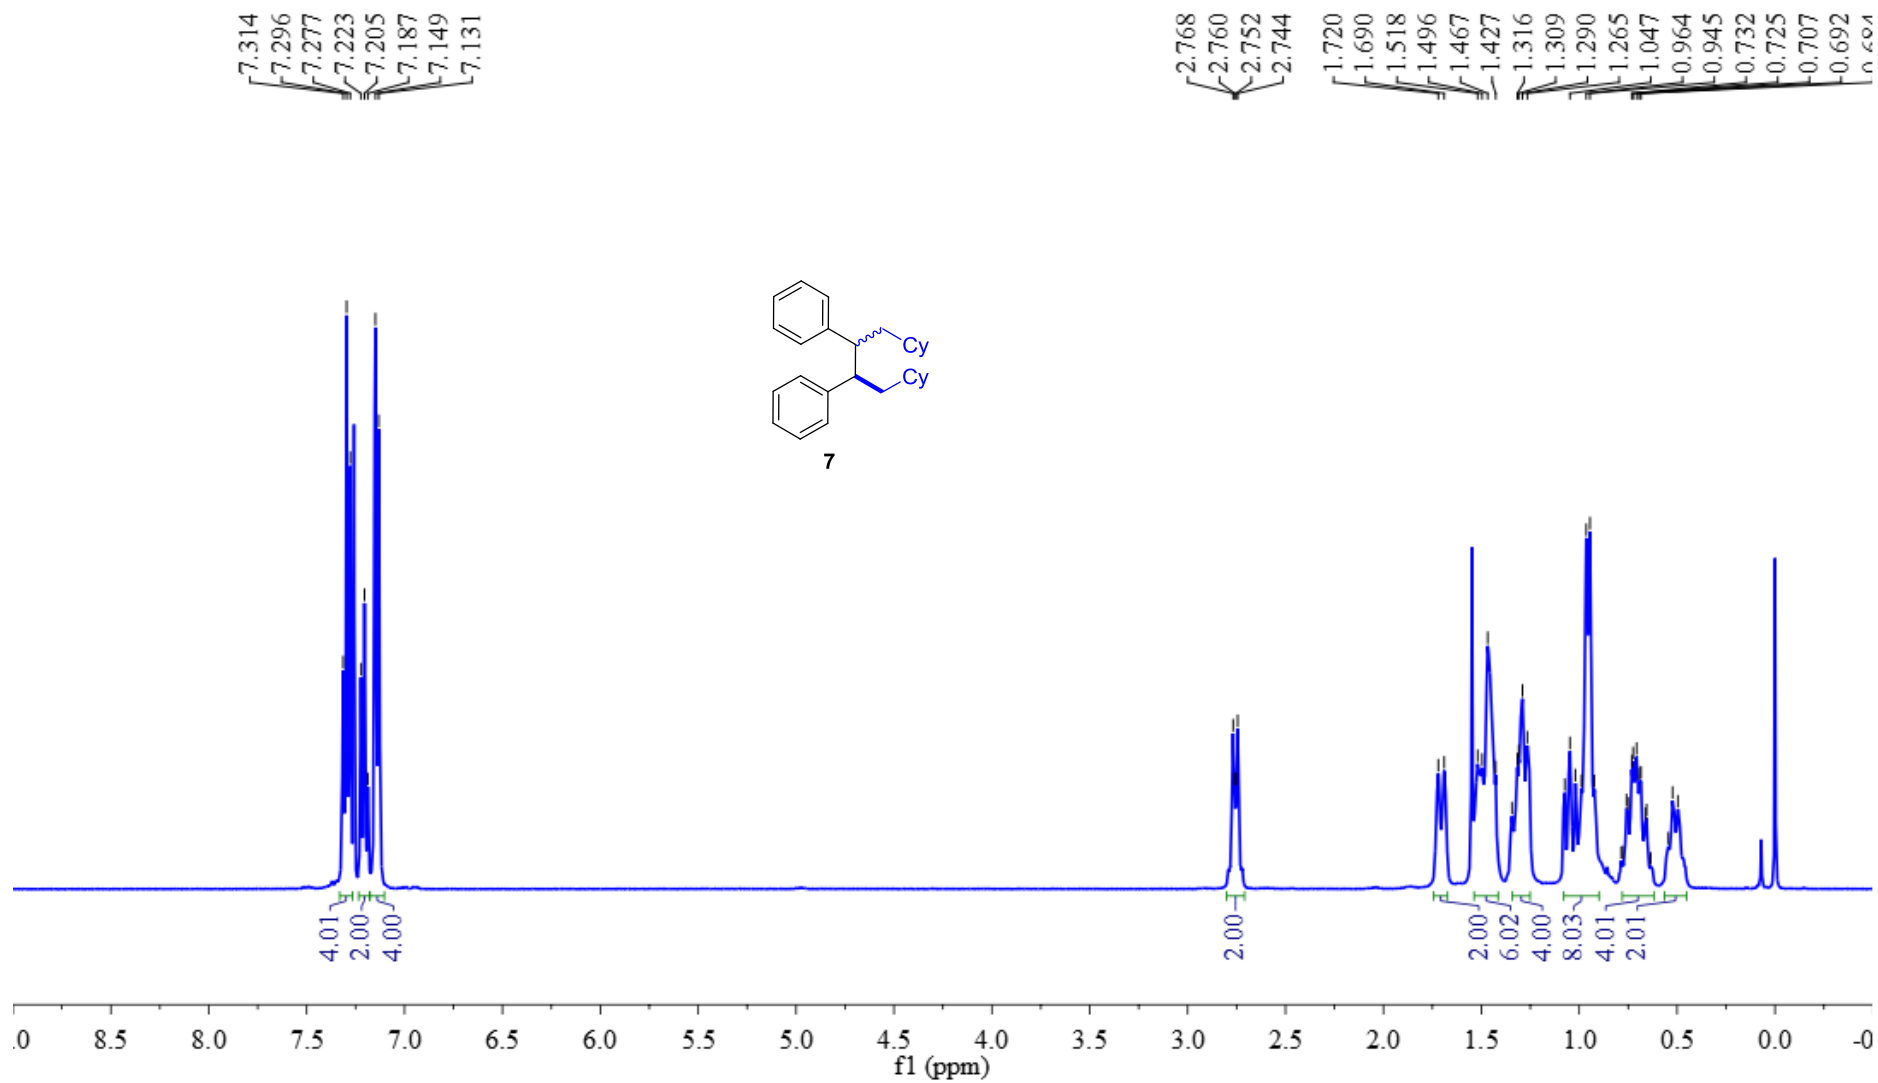



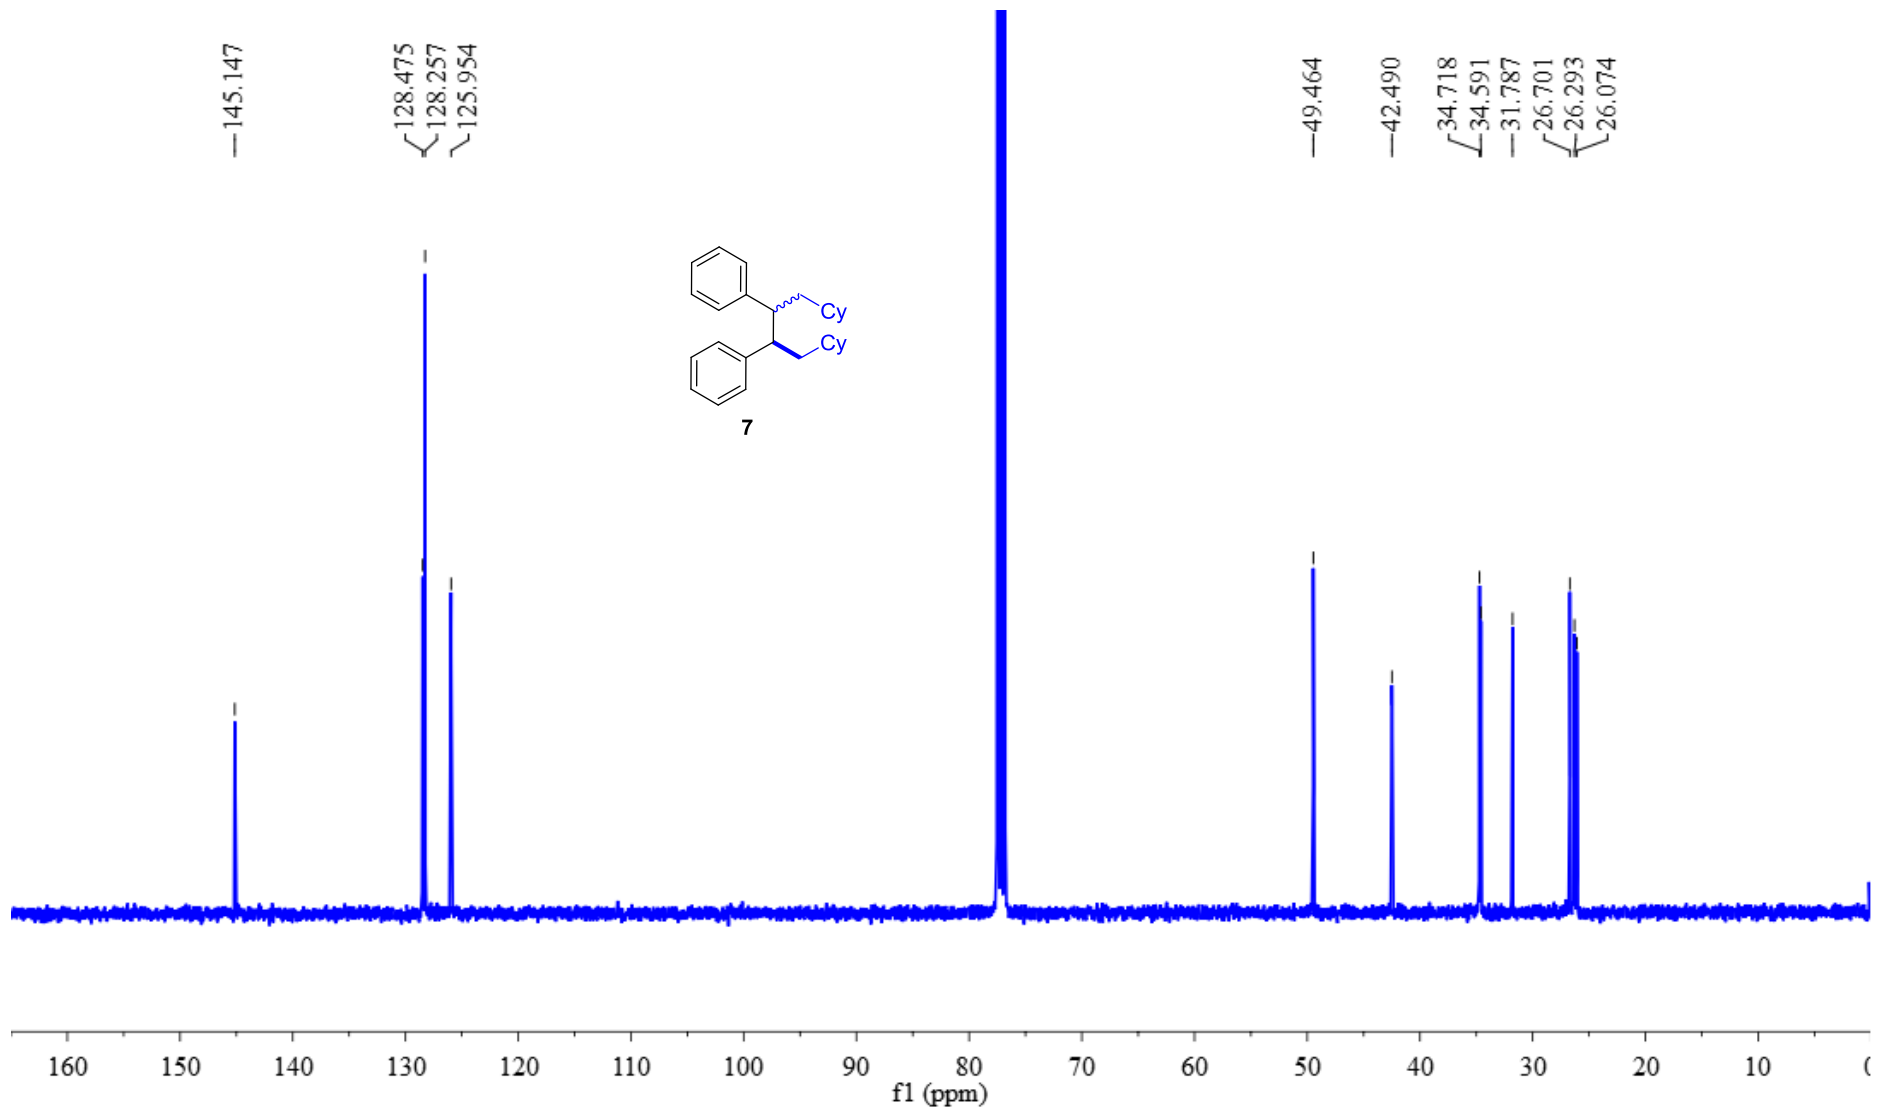

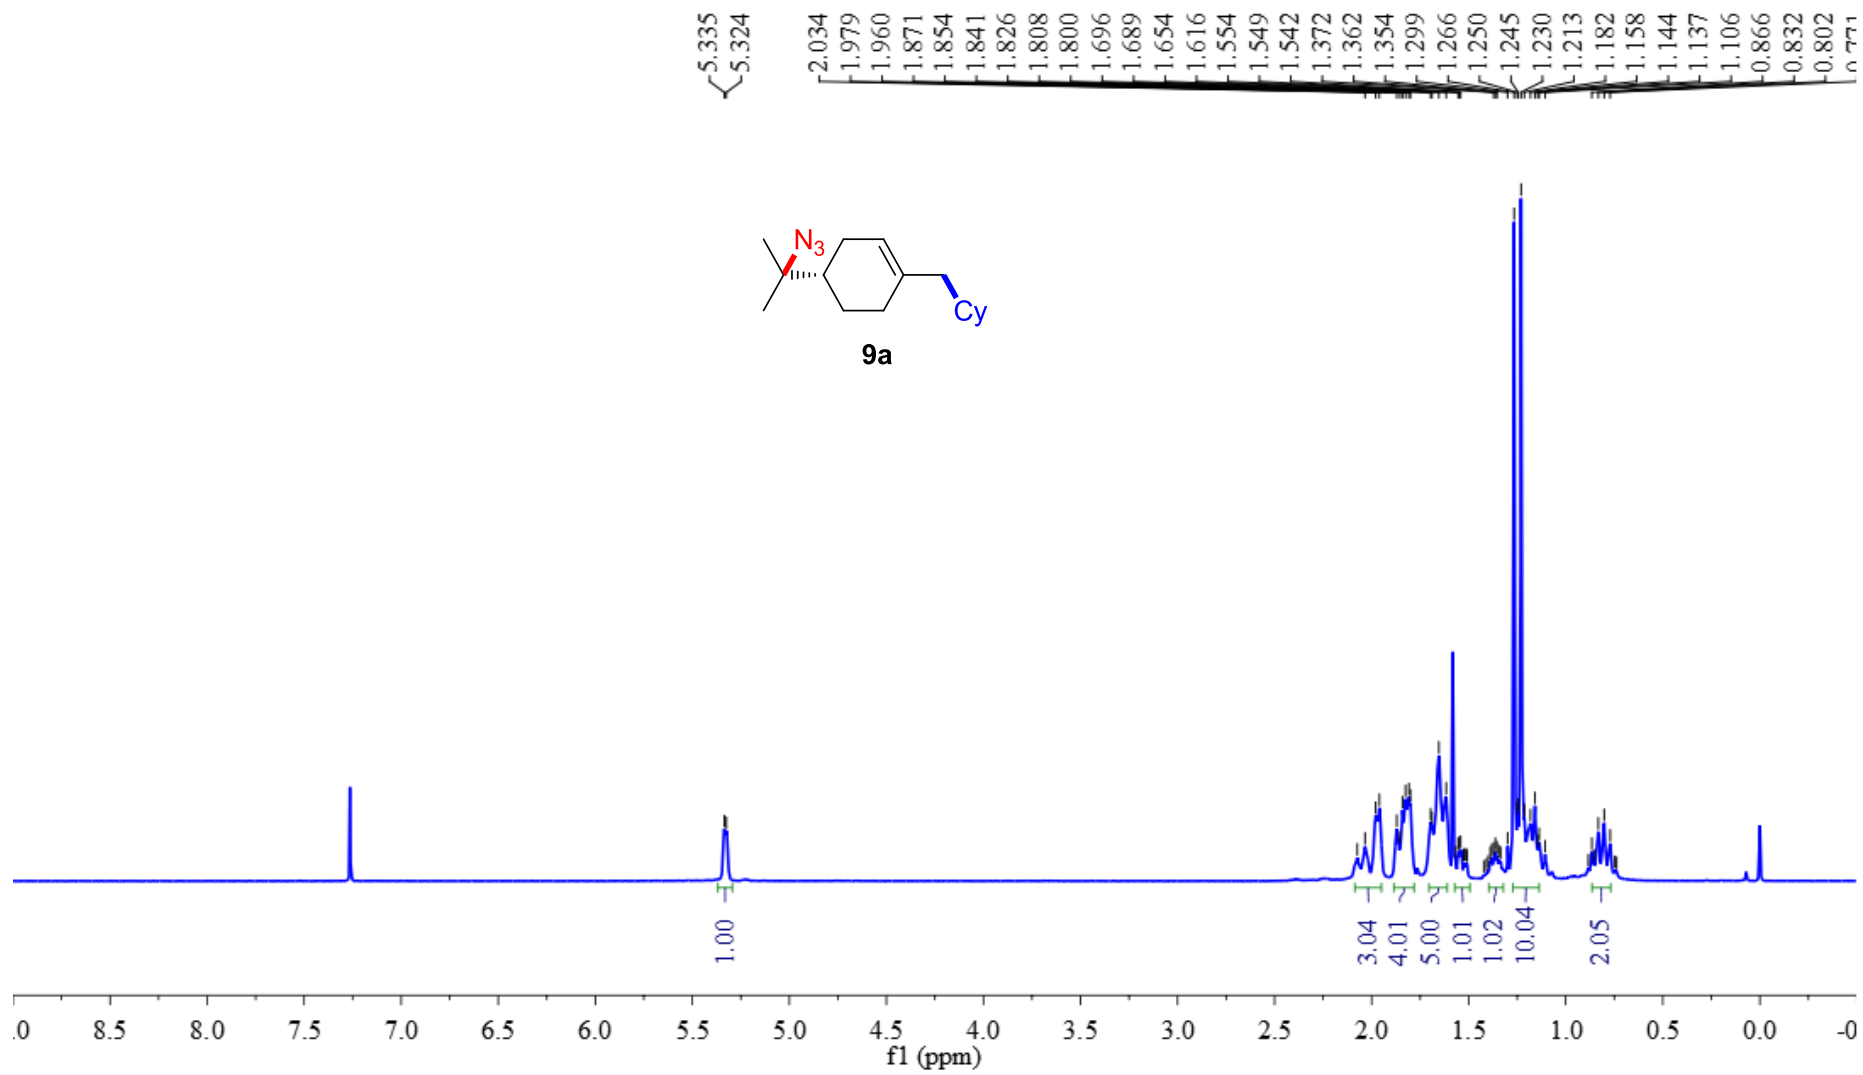

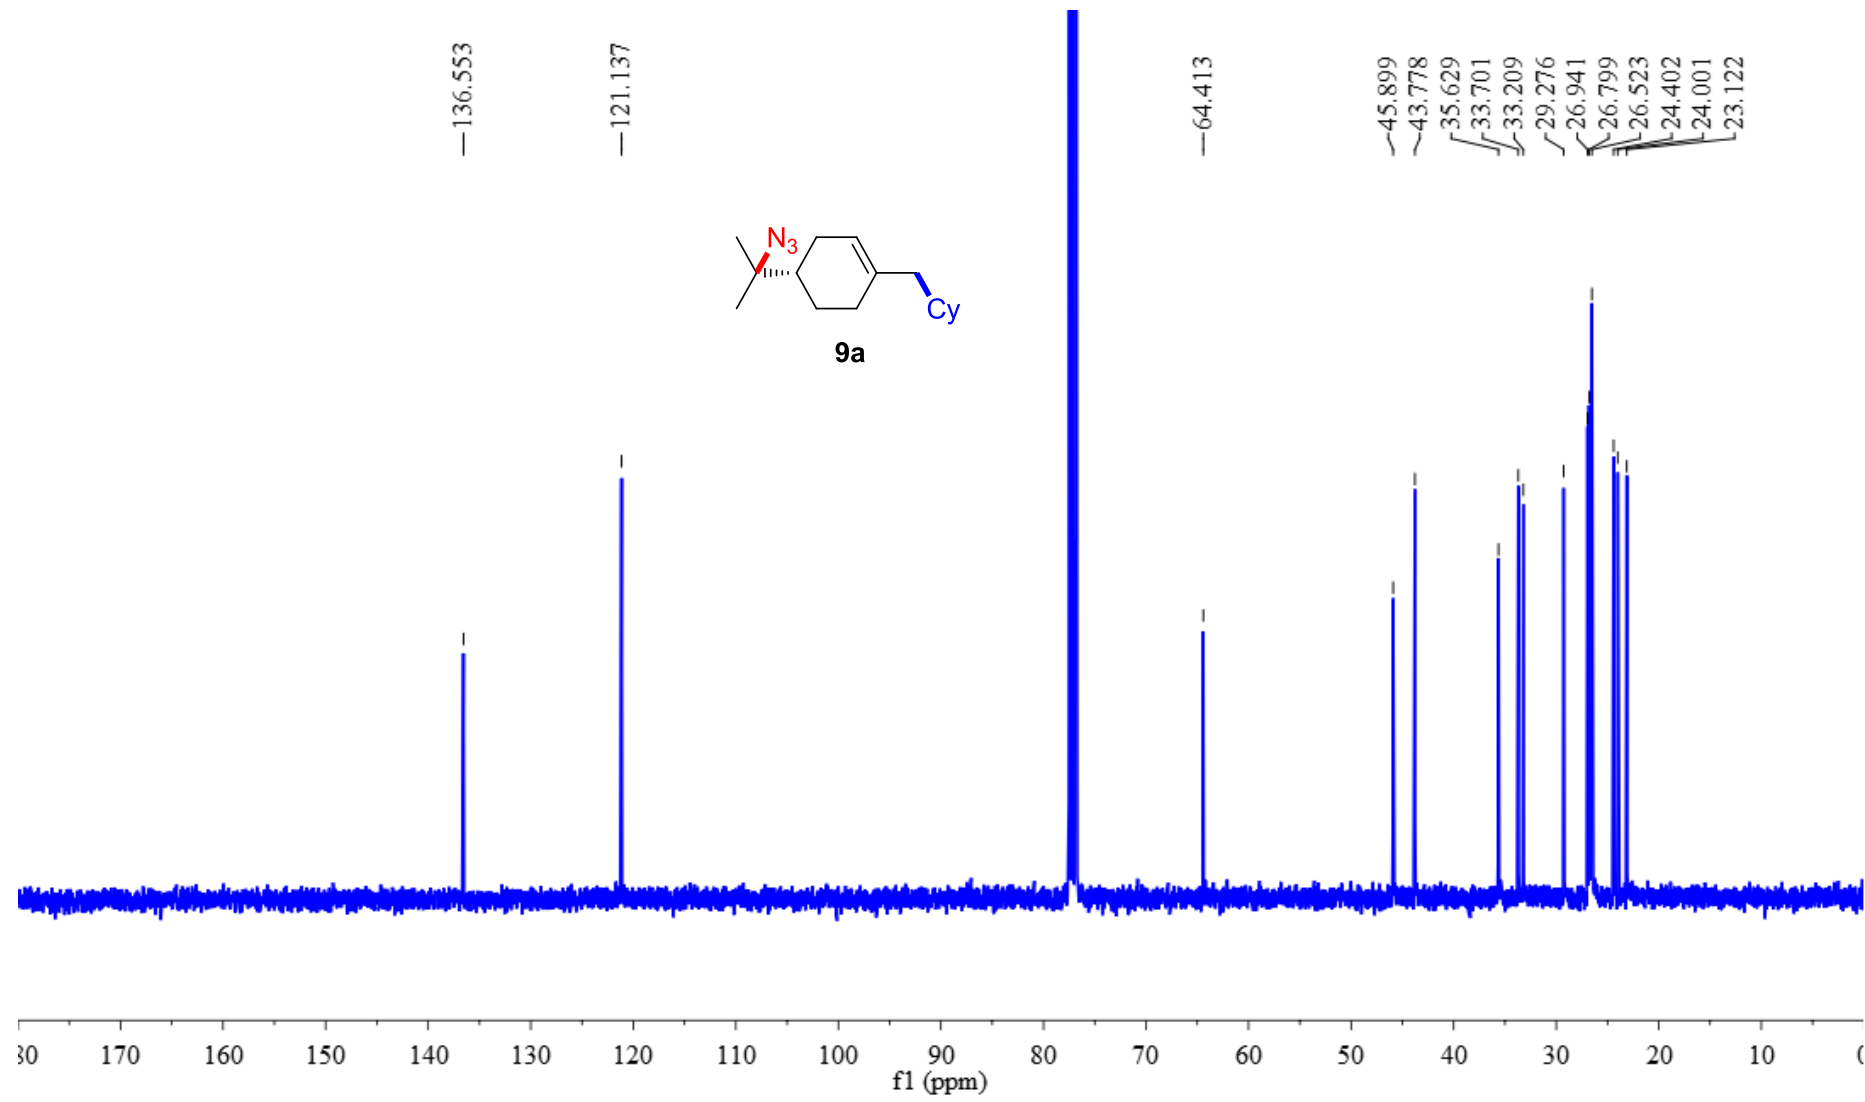



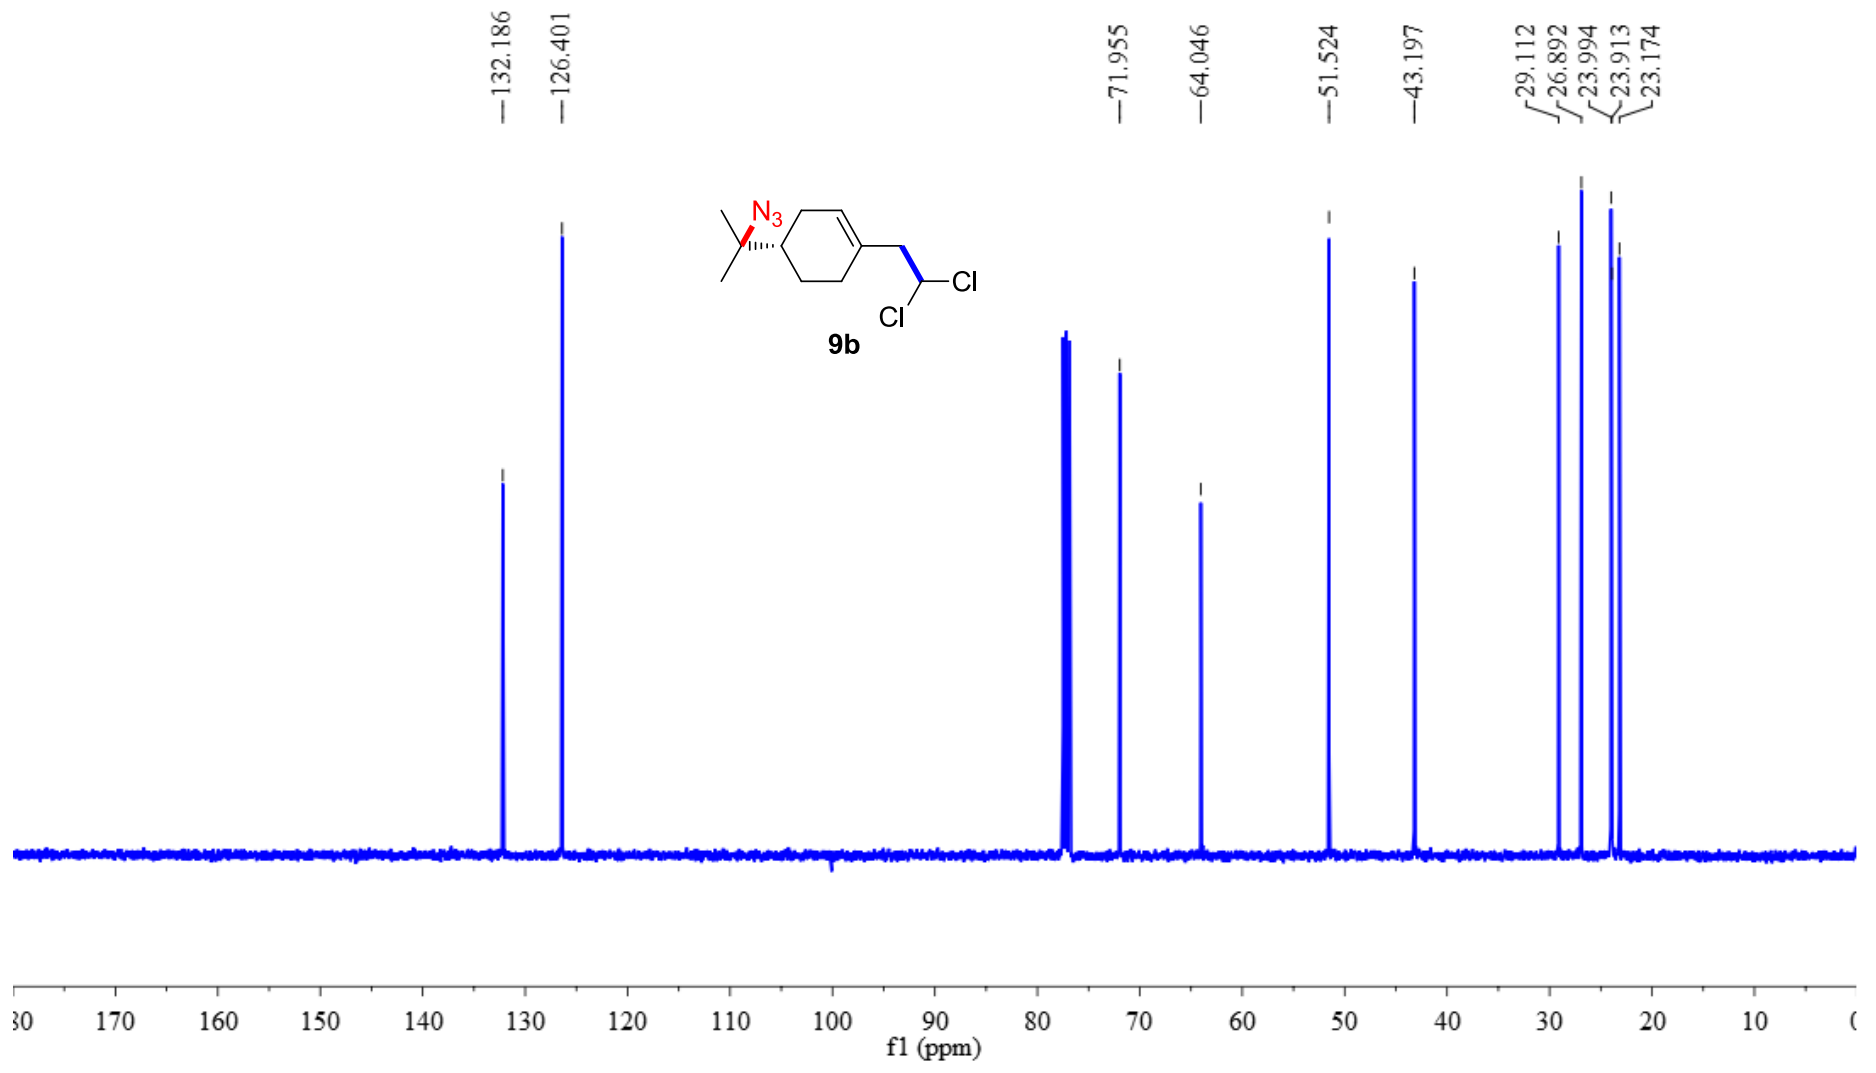

S100

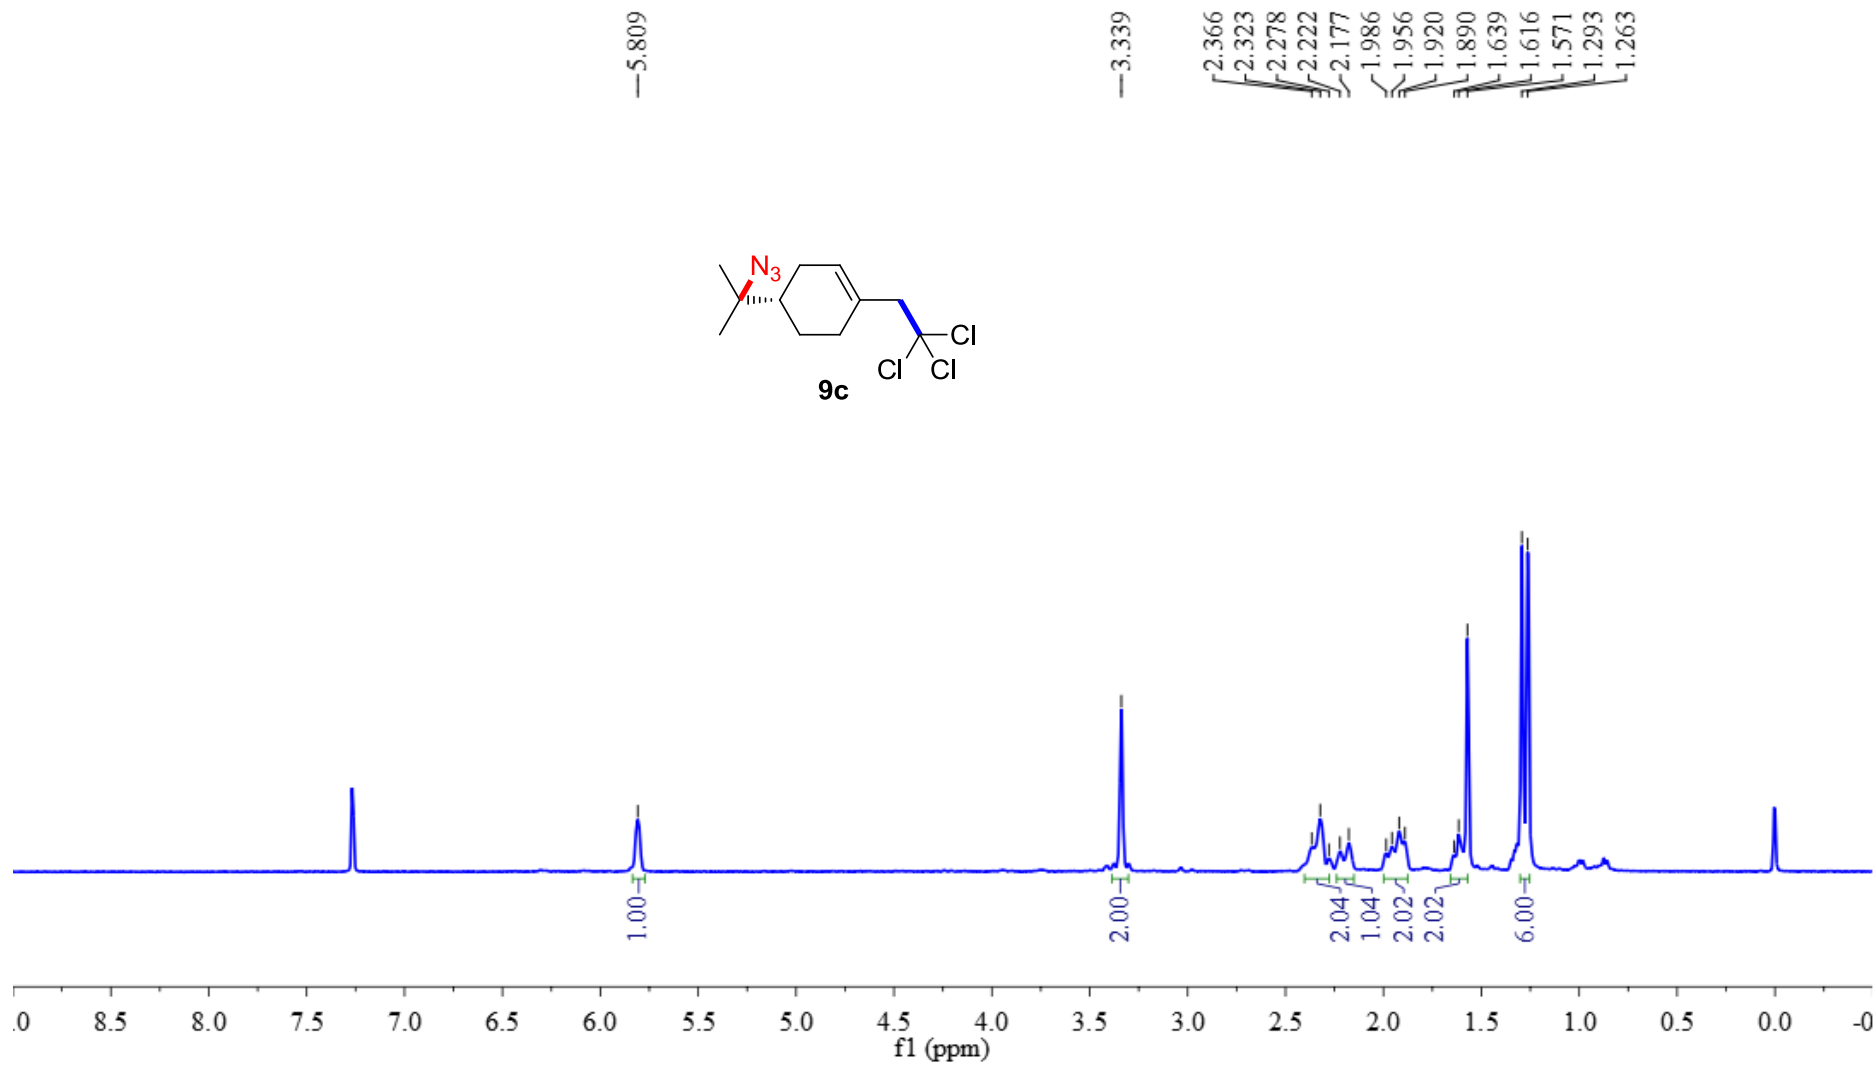

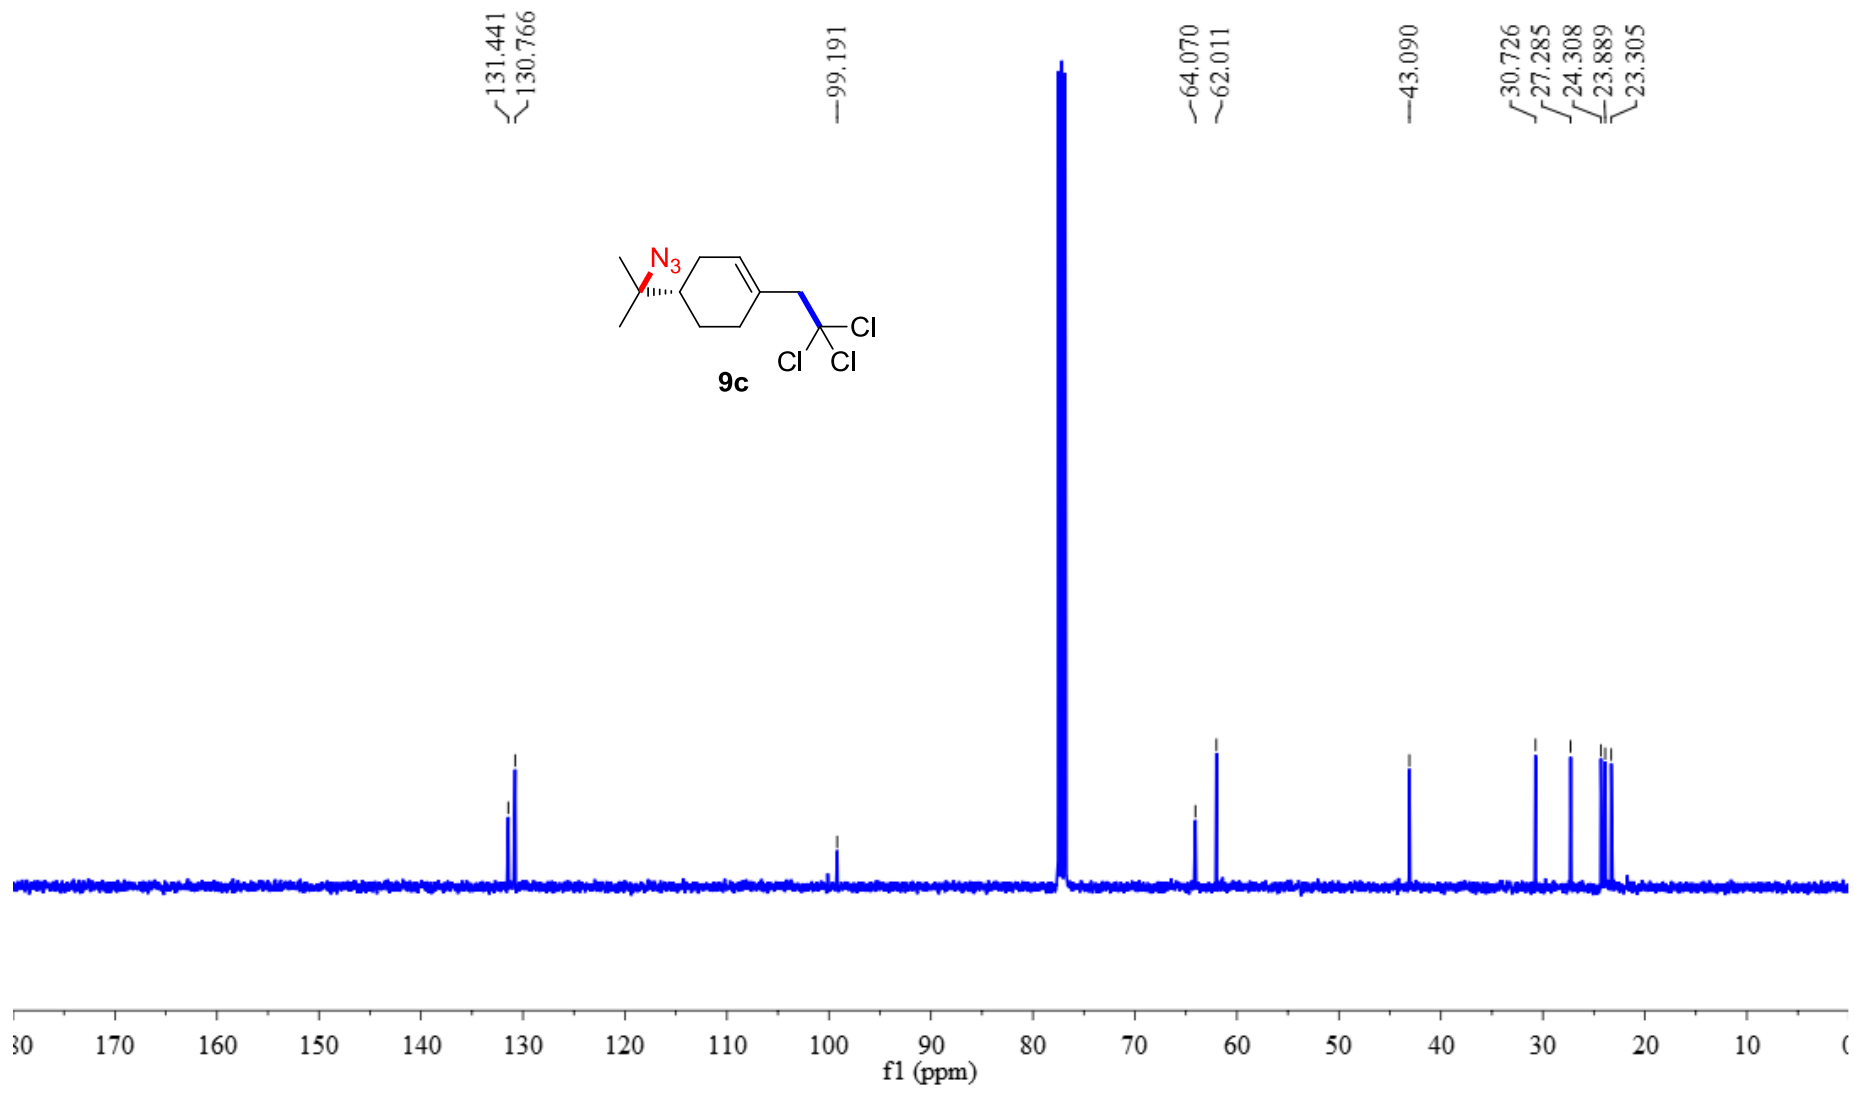

S102

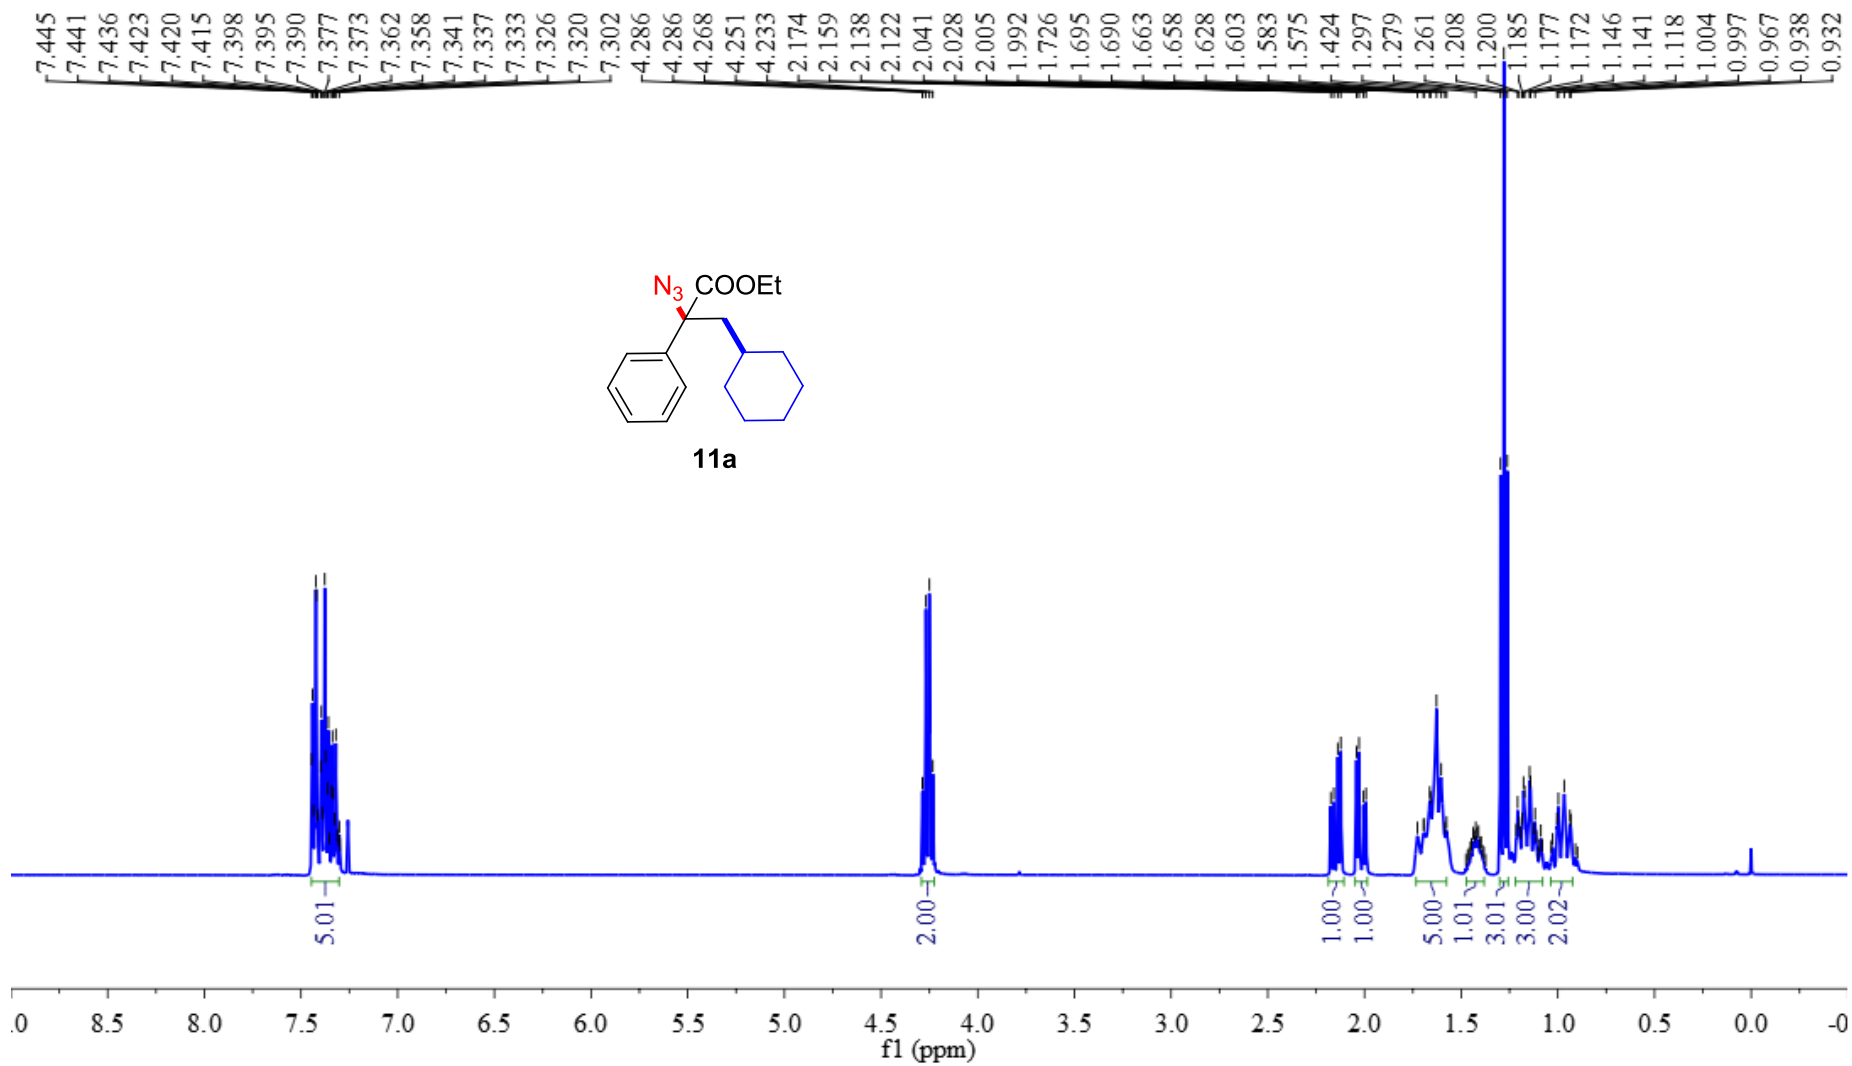

S103



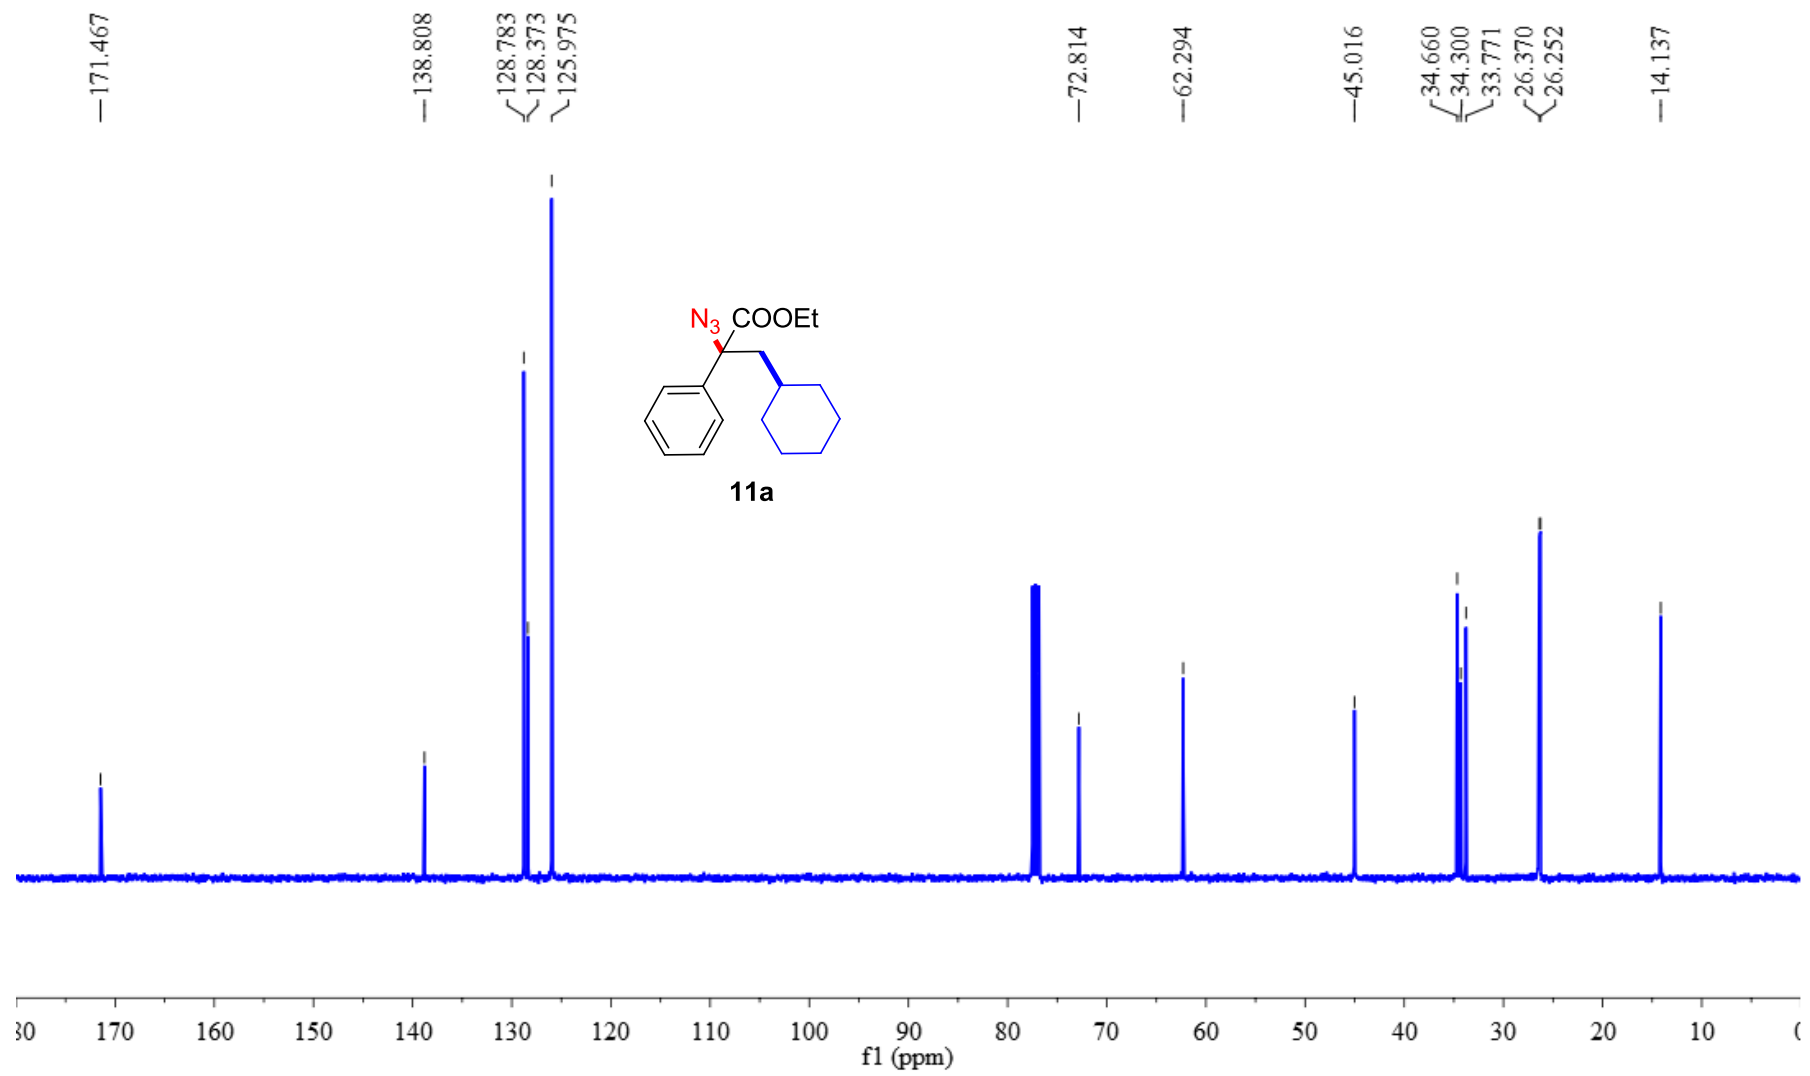

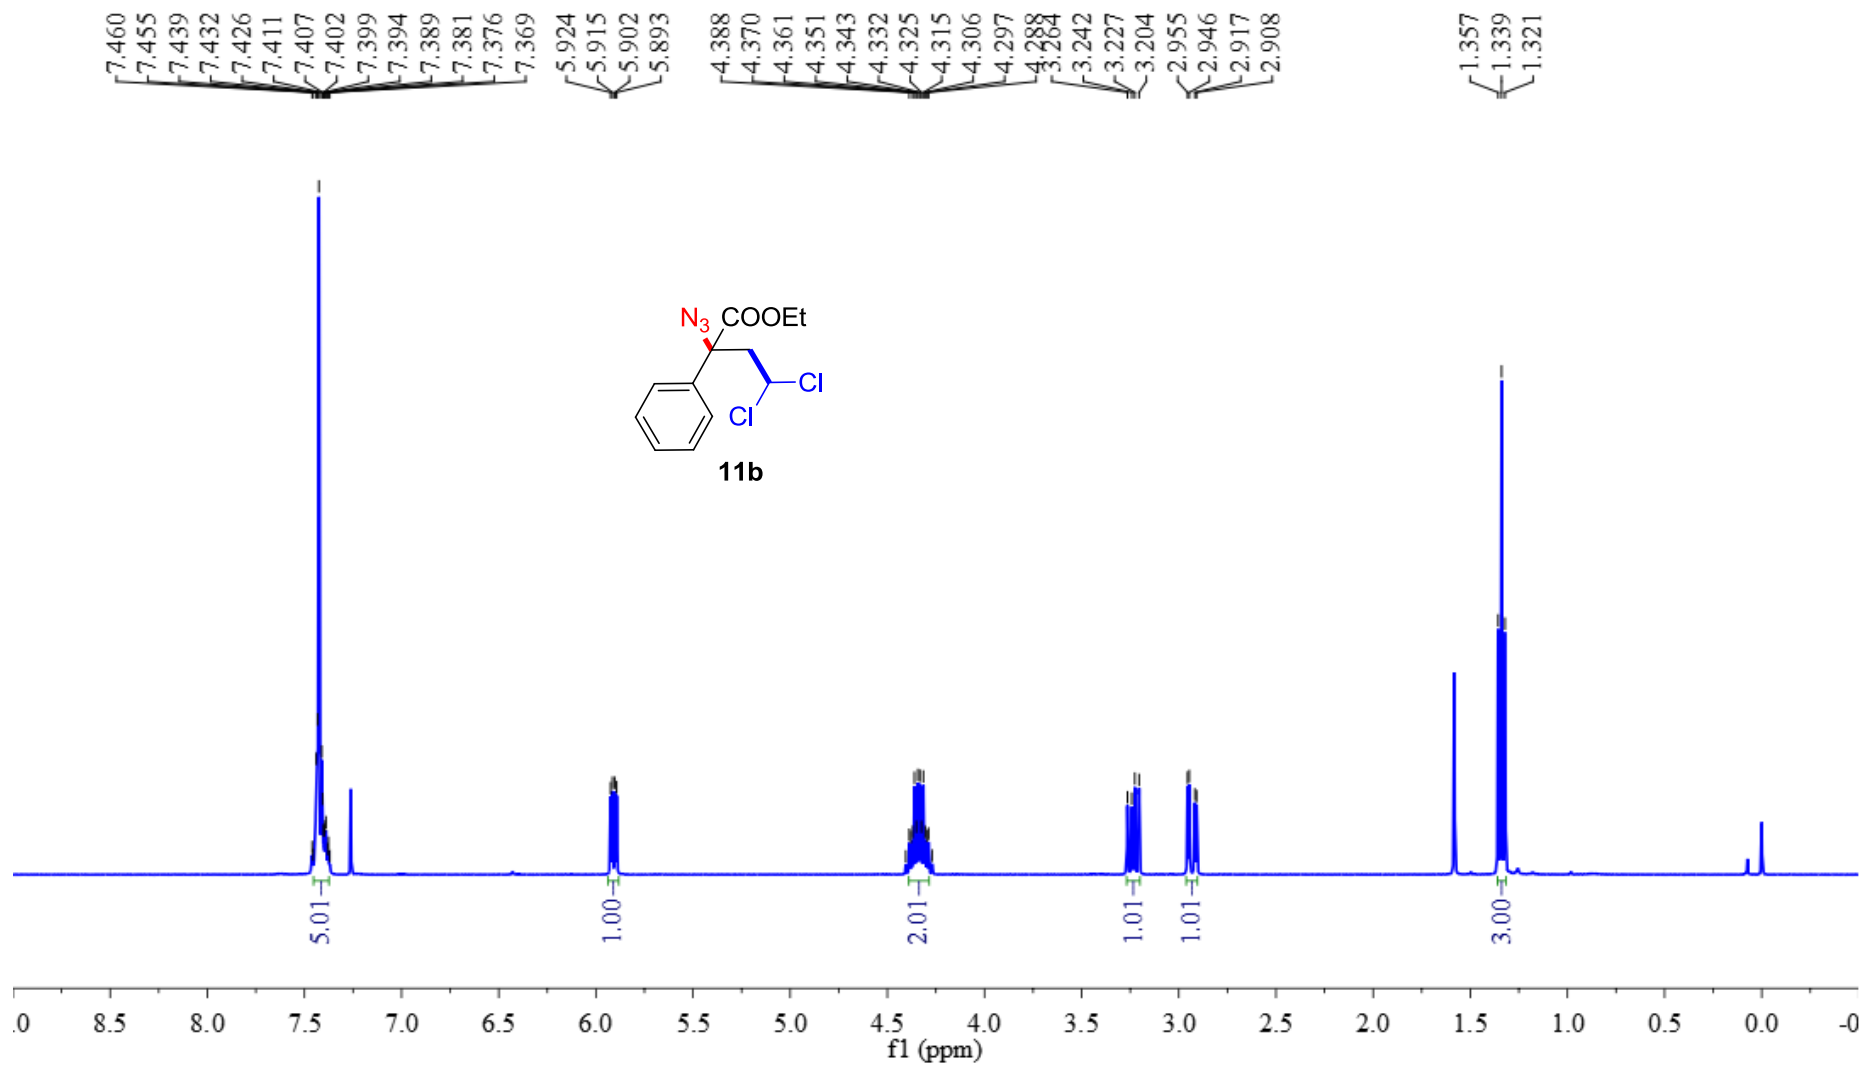

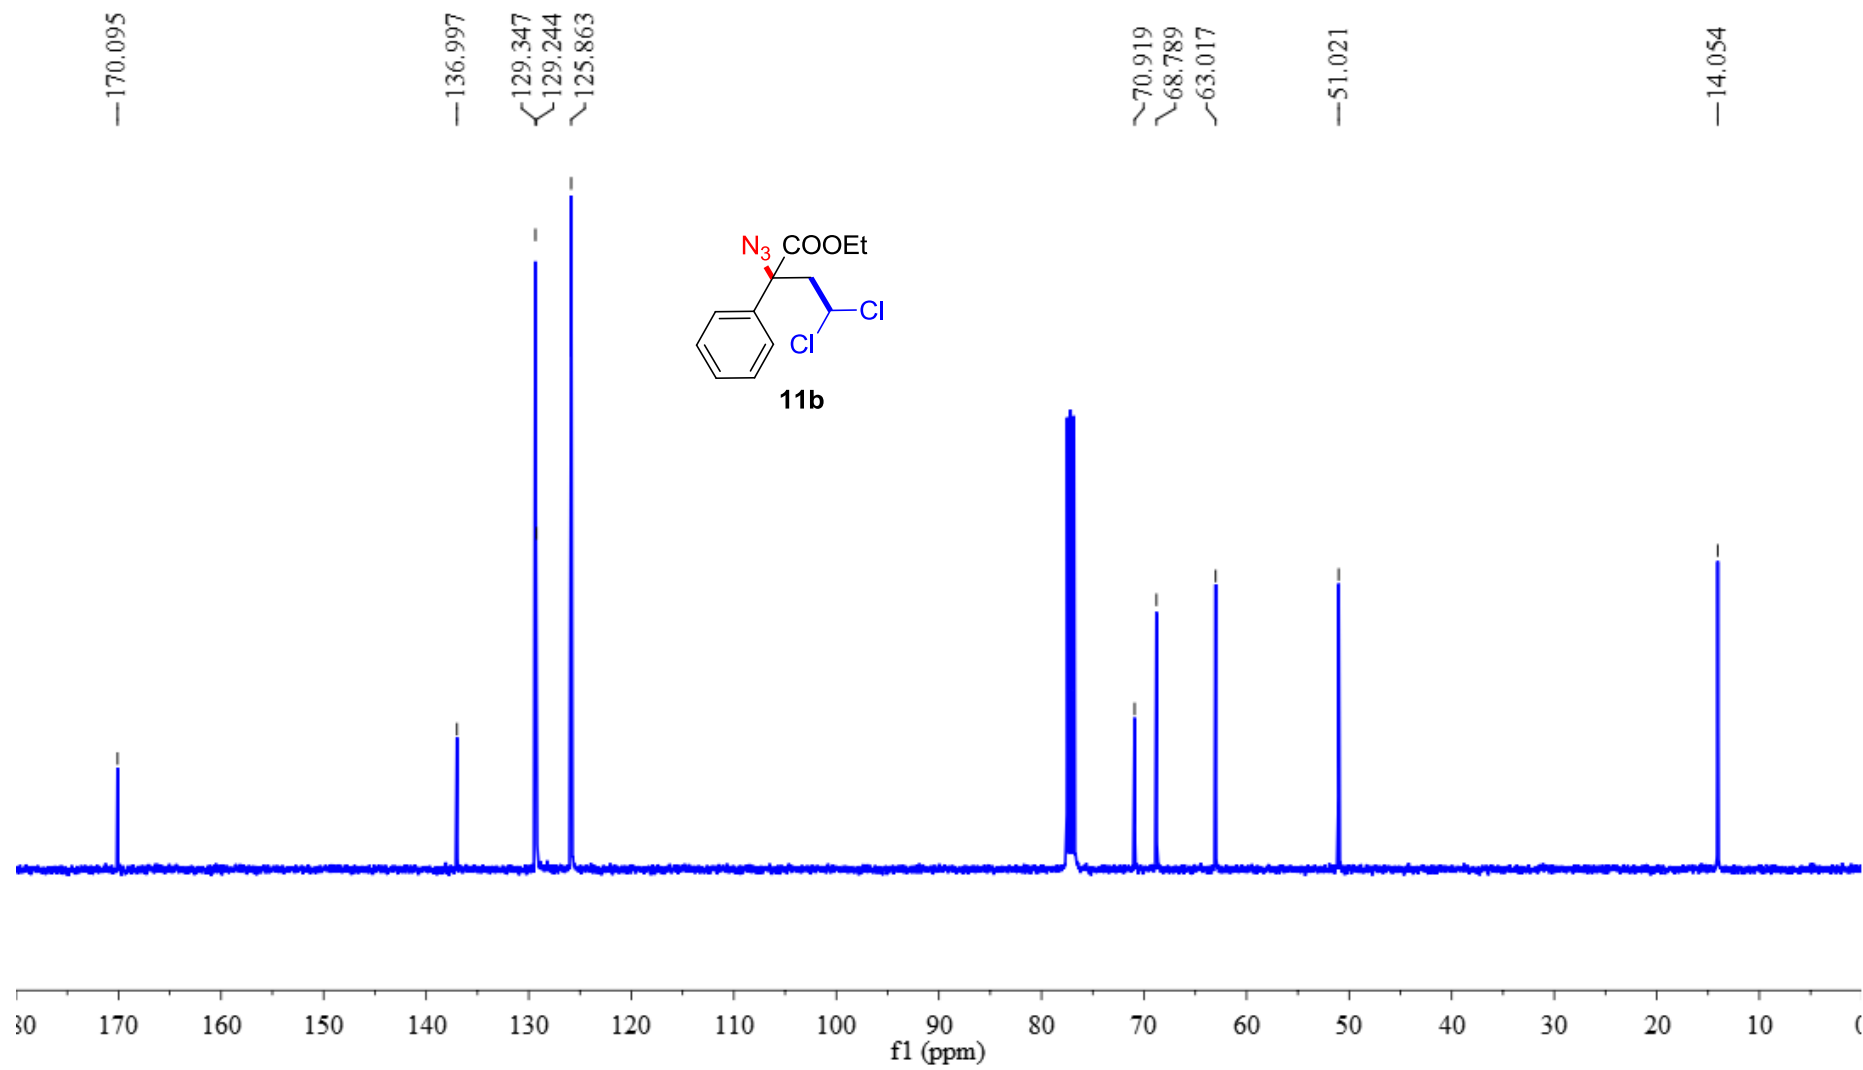

S106

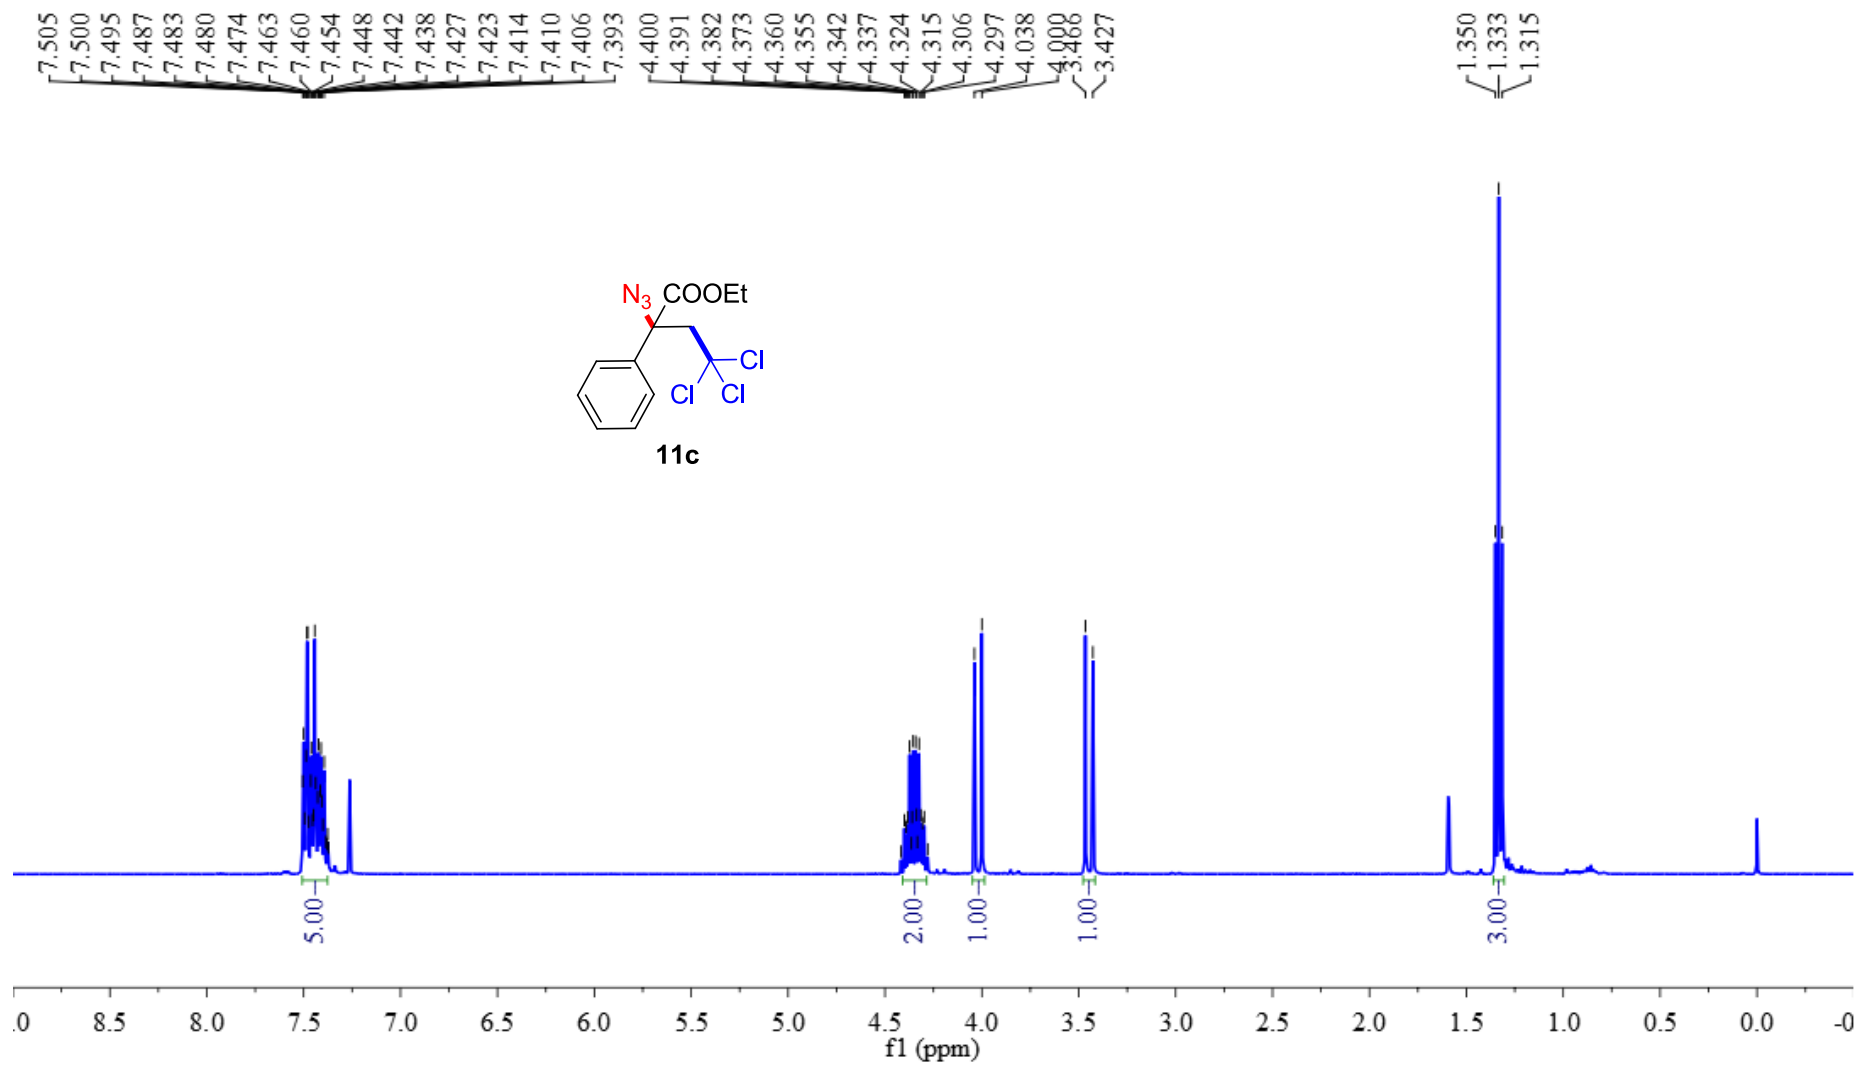

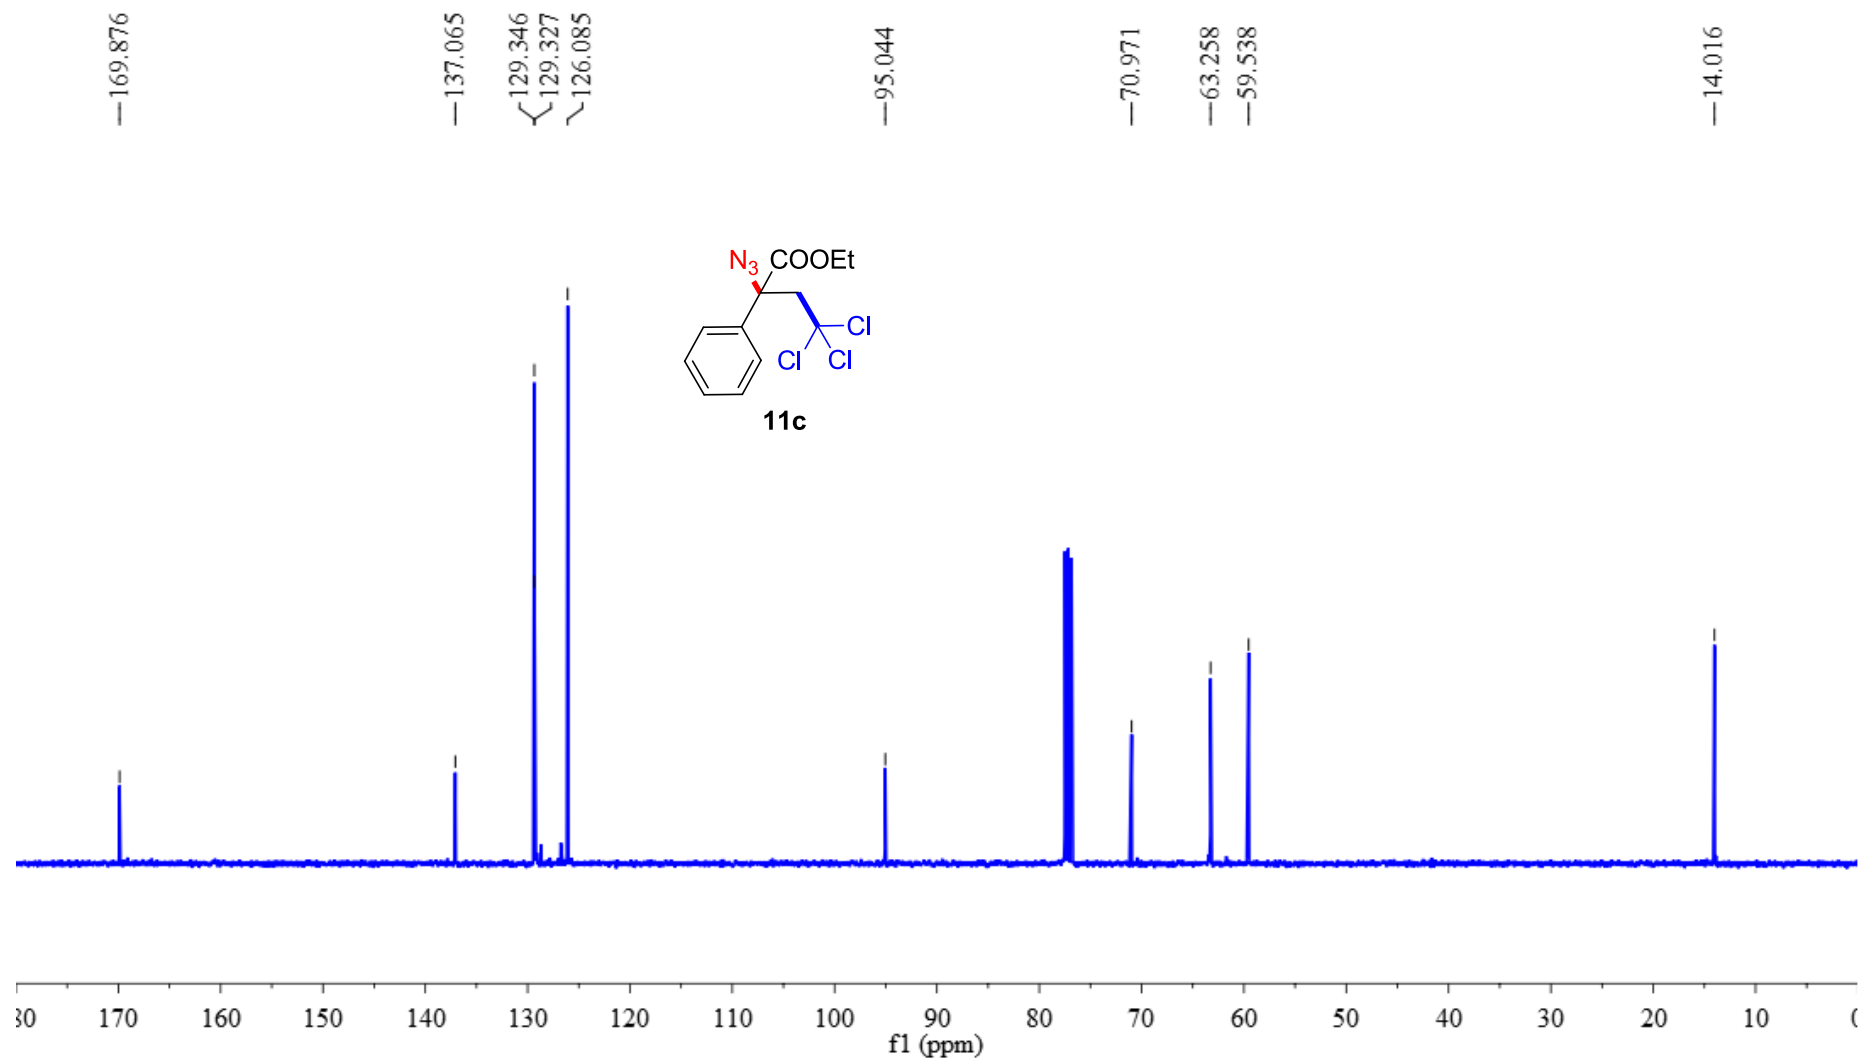

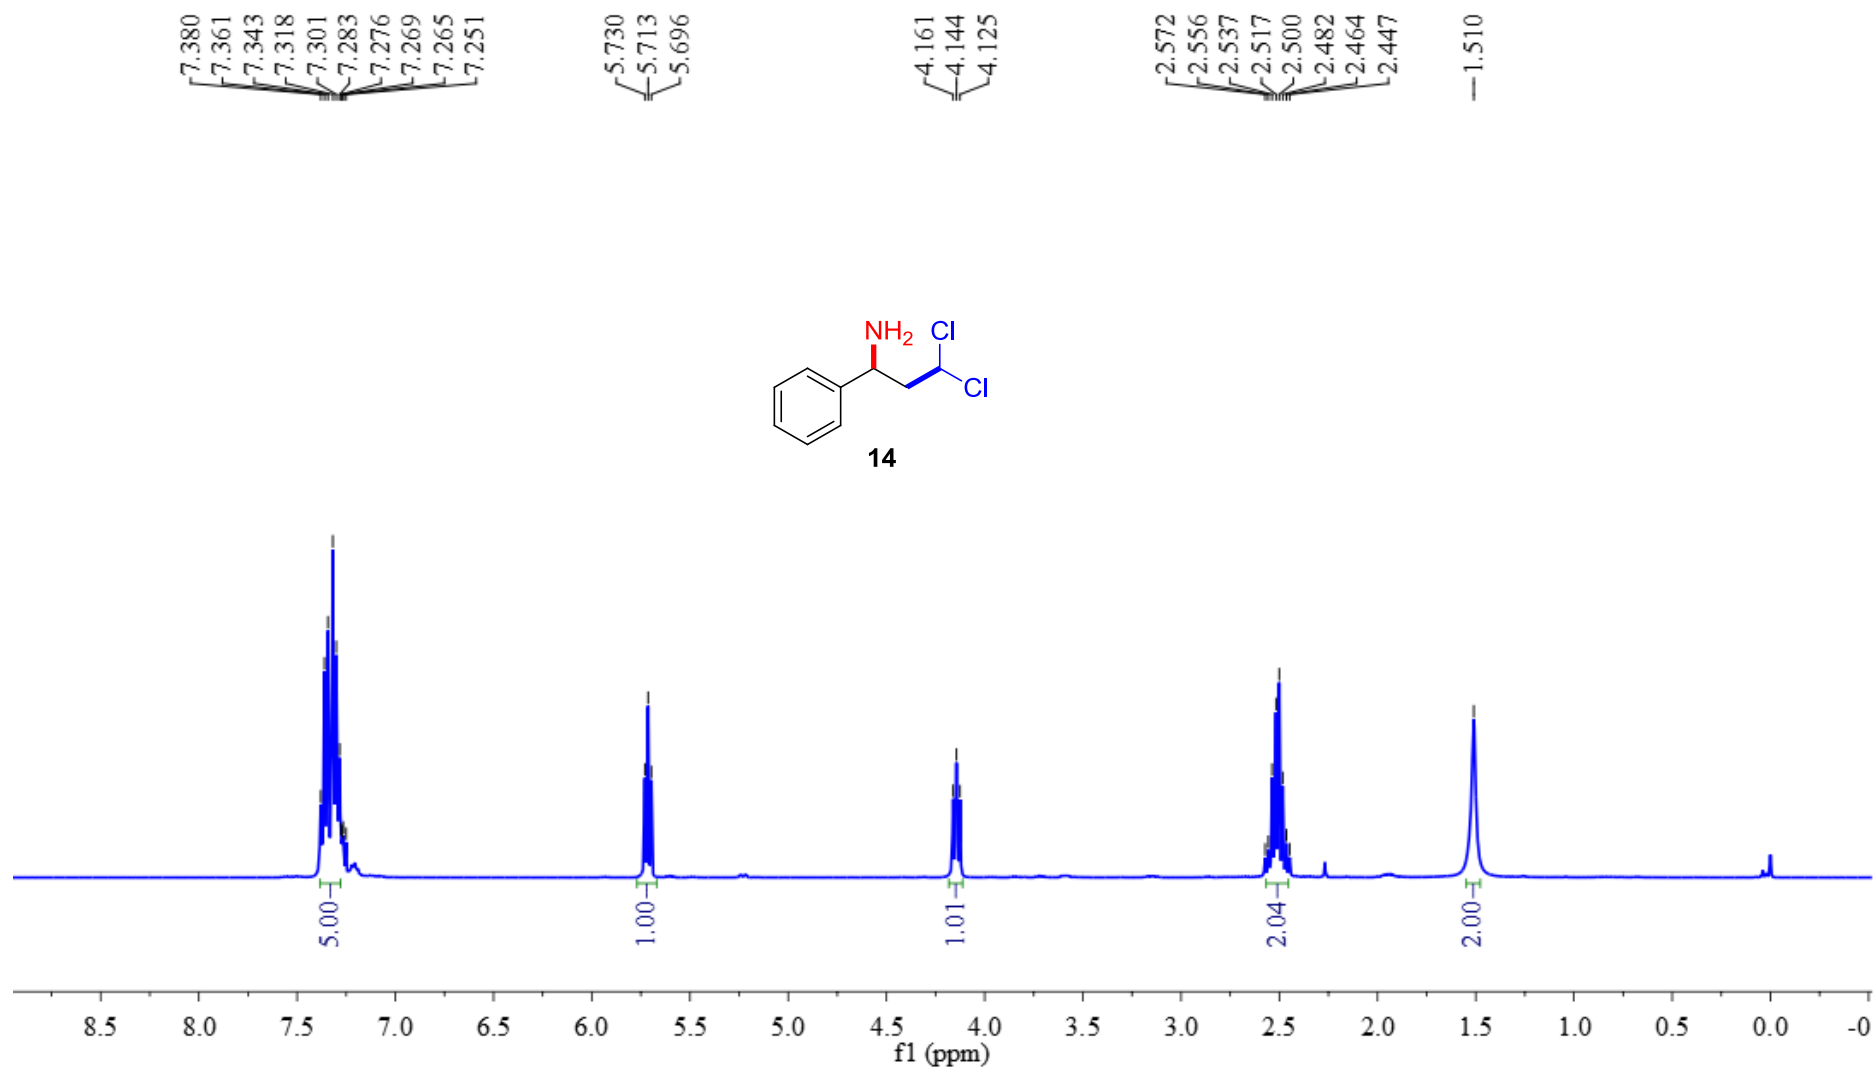

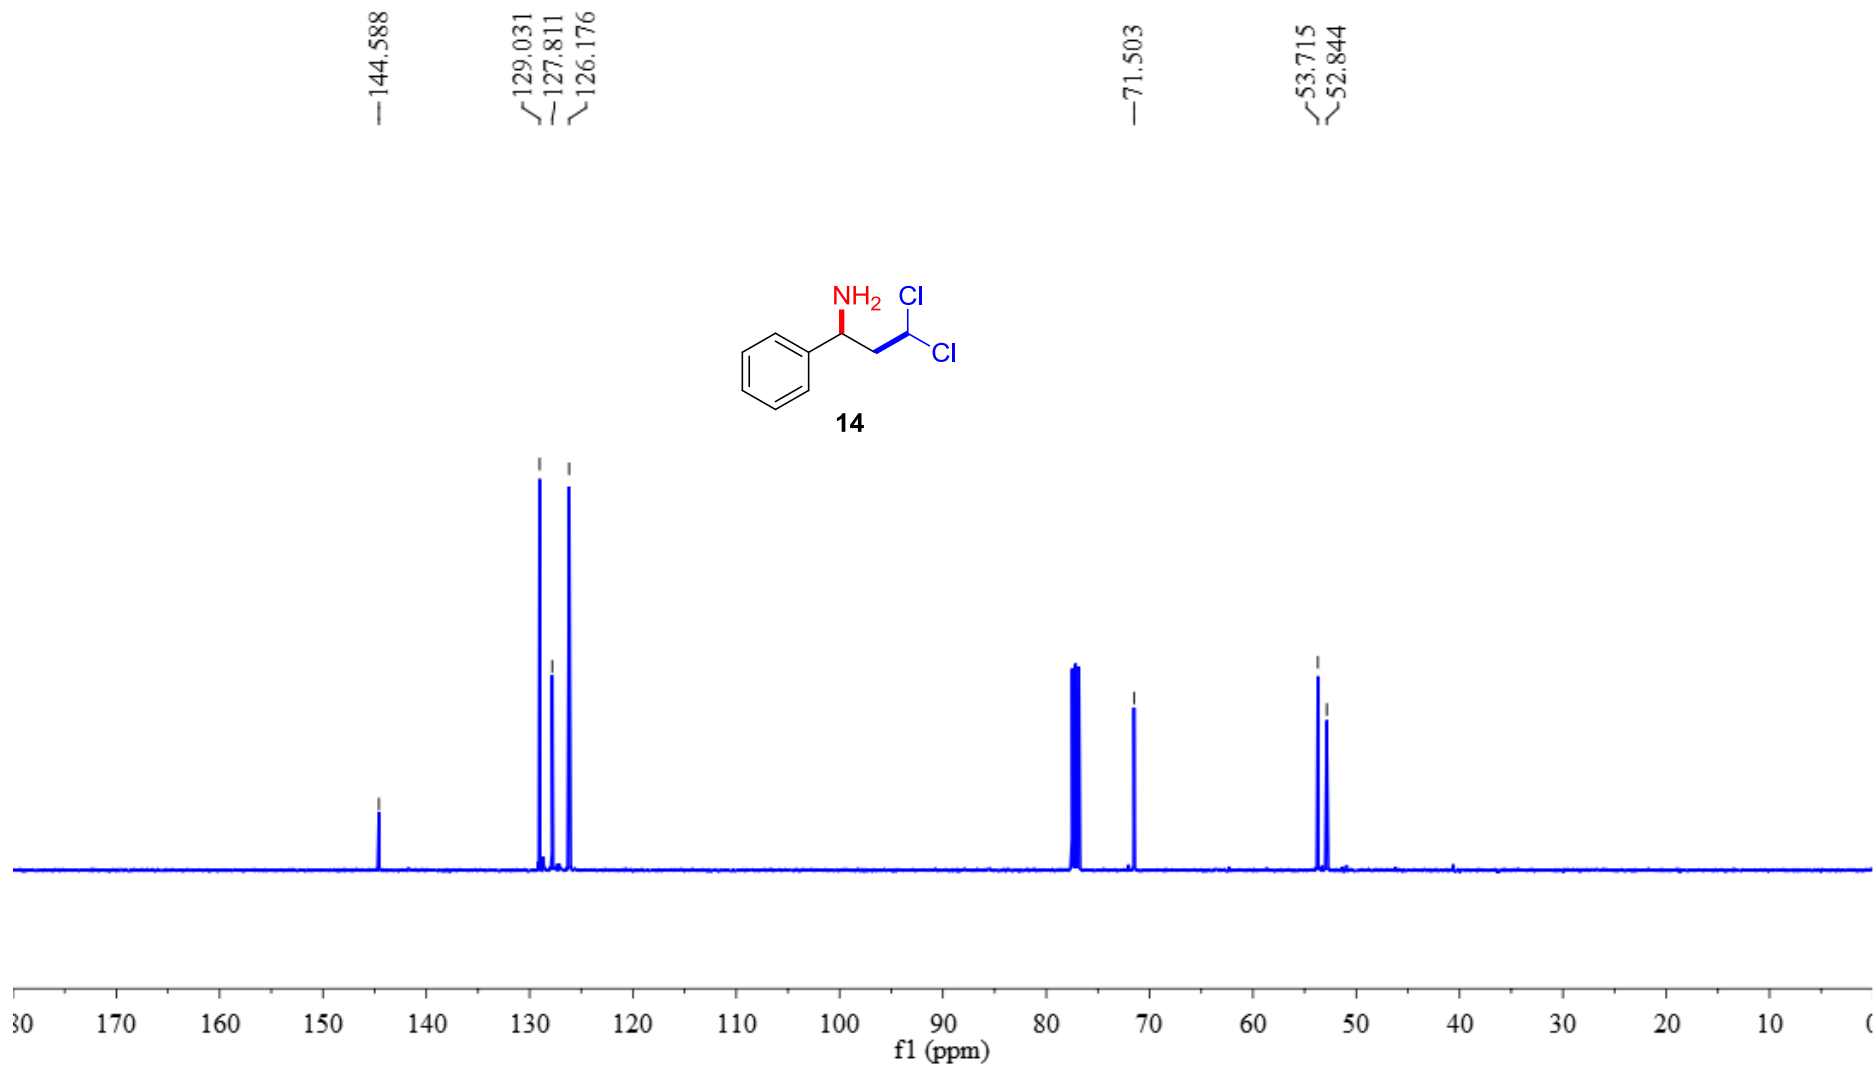

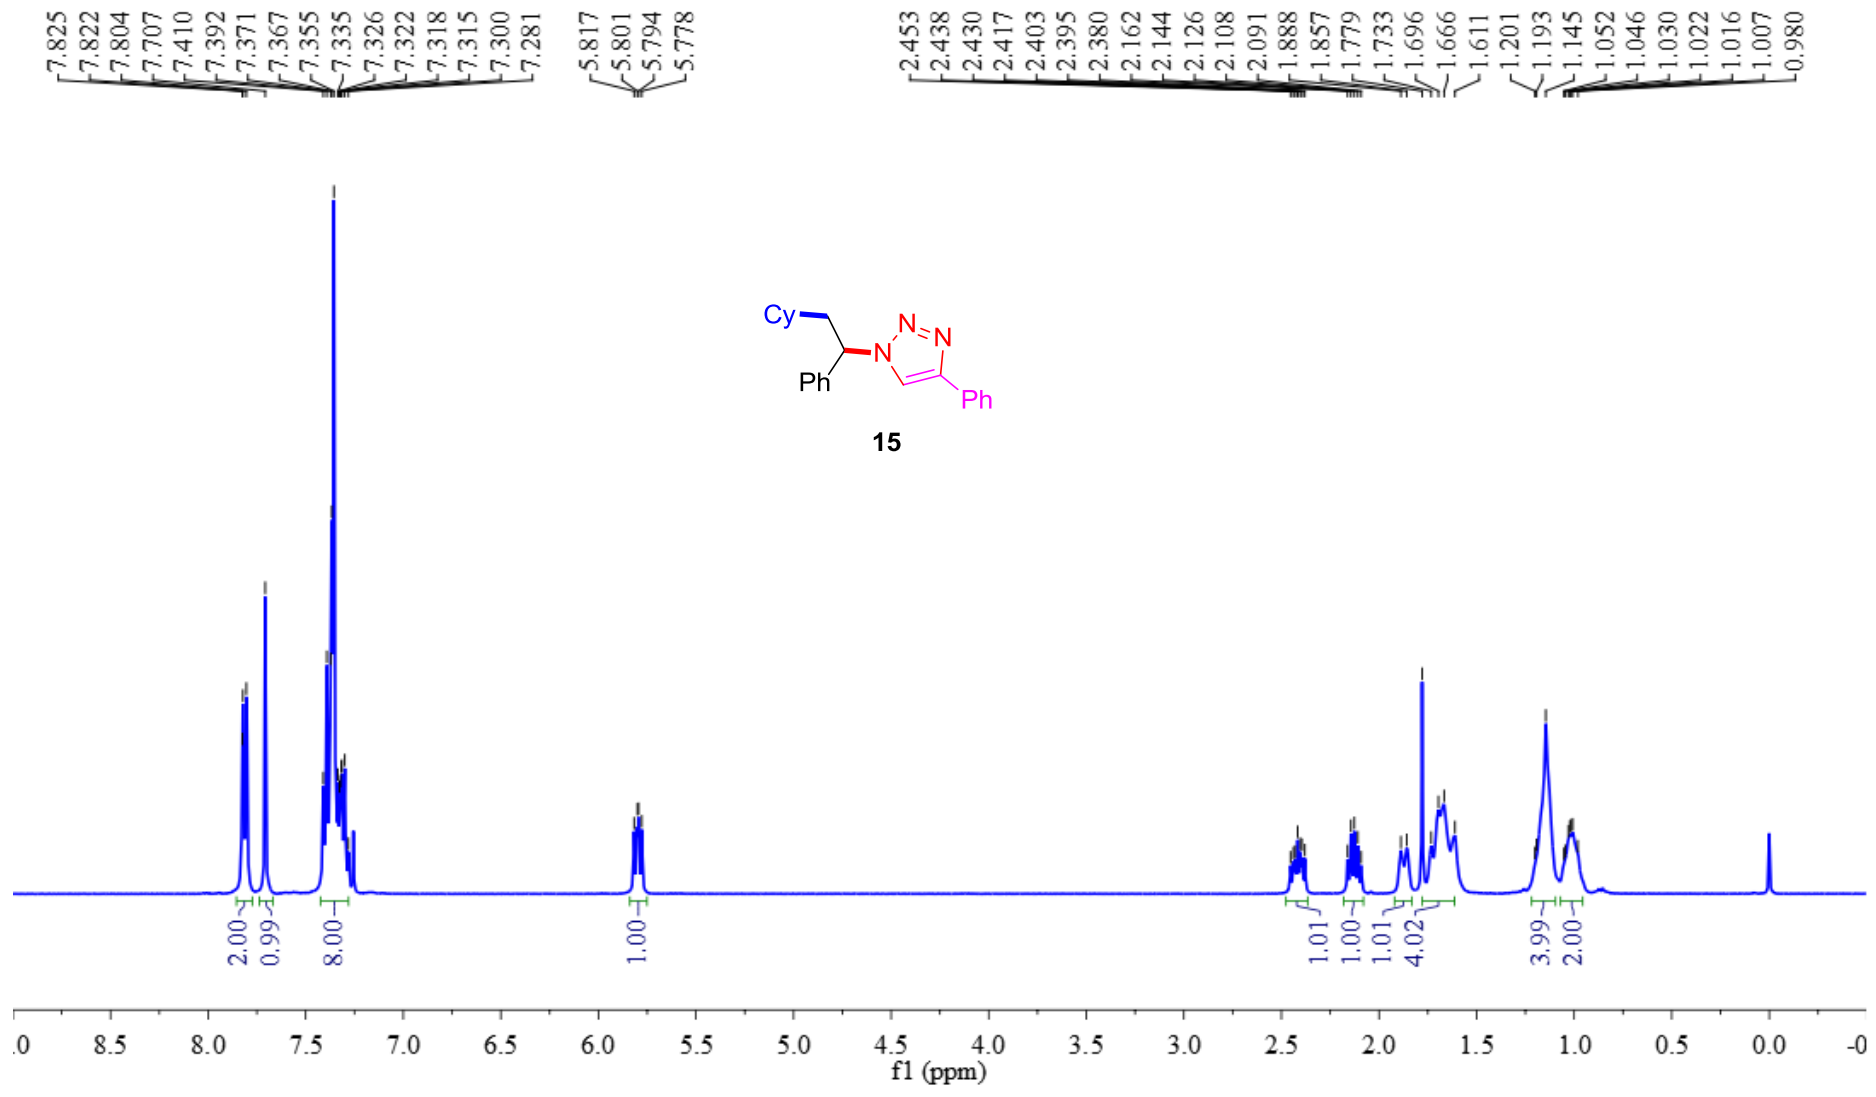



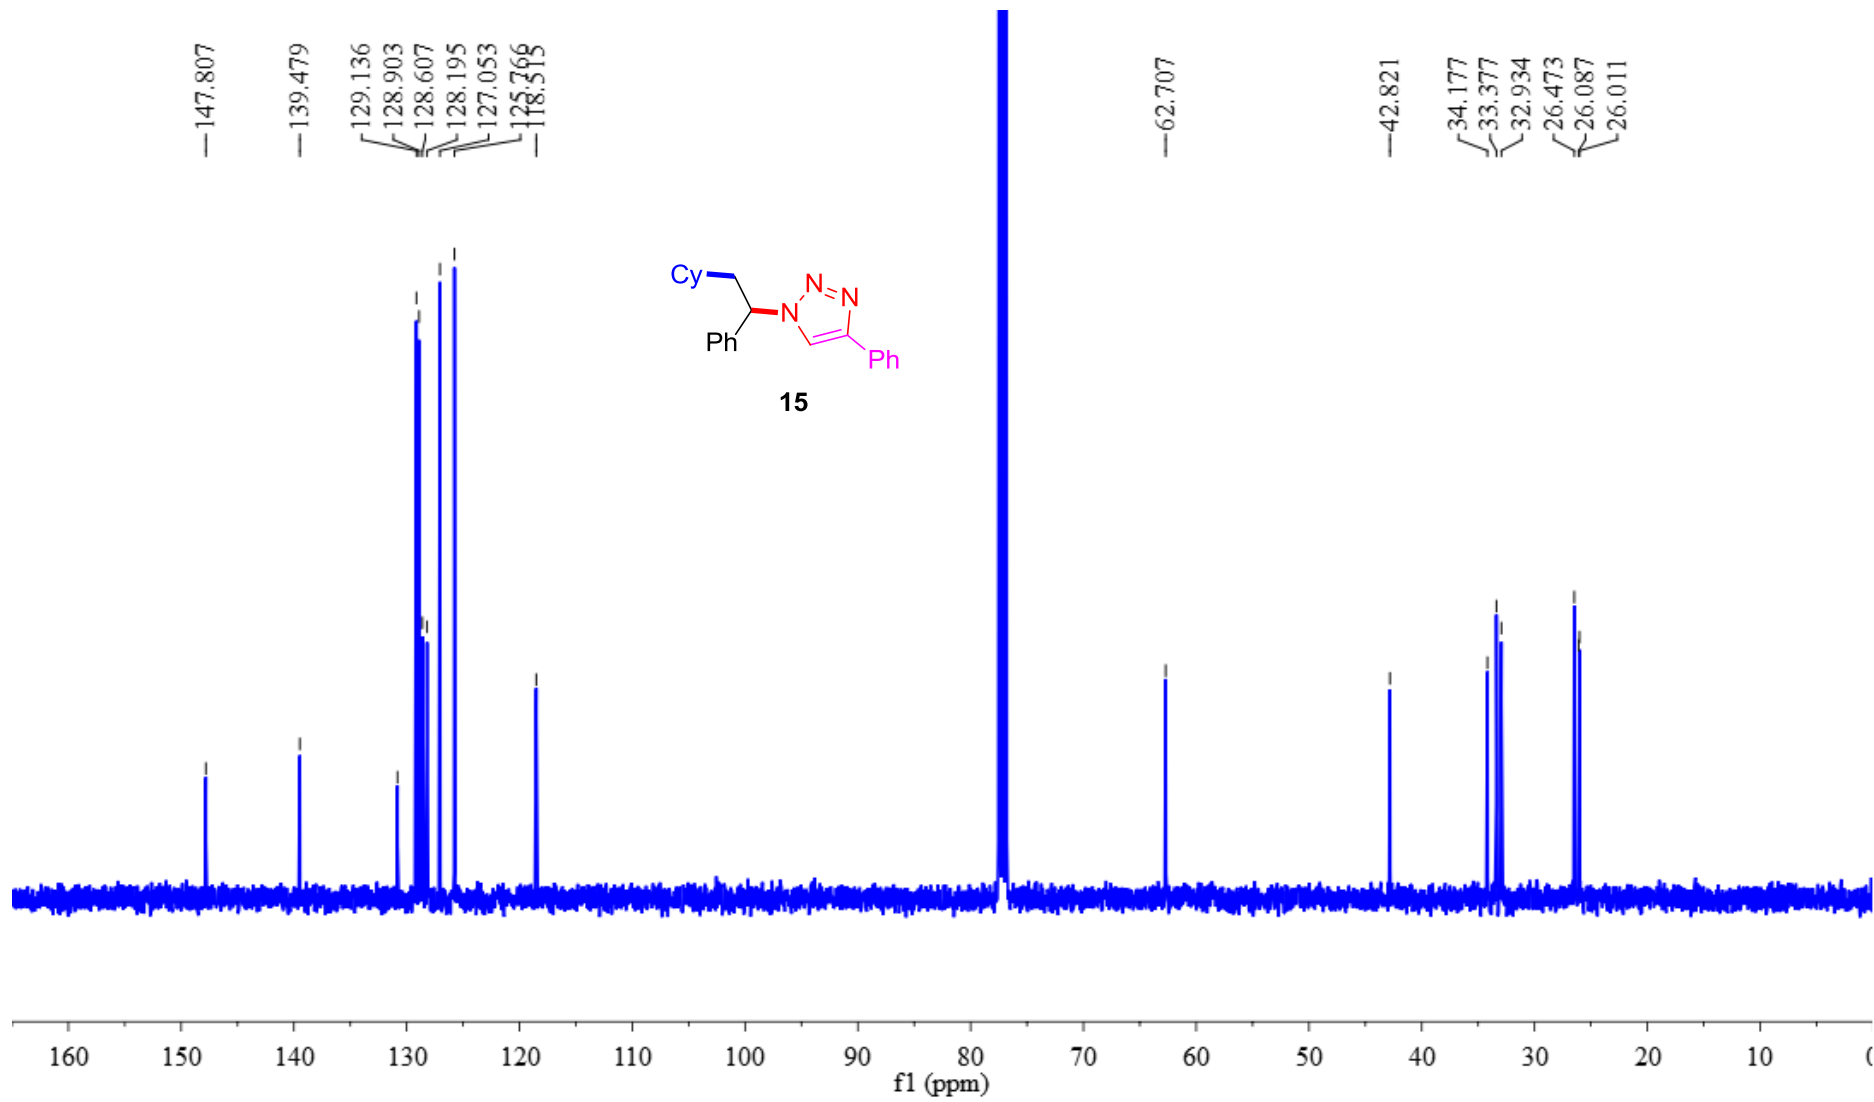

Supplement: c8cc05090b1.pdf [file c8cc05090b1.pdf]
